# Supplementary material for: A CO2-Responsive Imidazole-Functionalized Fluorescent Material Mediates Cancer Chemotherapy
Source: MDPI journal article supplement (doi:10.3390/pharmaceutics15020354), 2023-01-20
Supplement: s1 [file s1]

## Supporting Information

# **A CO<sub>2</sub>-Responsive Imidazole-Functionalized Fluorescent Material Mediates Cancer Chemotherapy**

Vo Thuy Thien Ngan <sup>1</sup>, Po-Yen Chiou <sup>1</sup>, Fasih Bintang Ilhami <sup>1</sup>, Enyew Alemayehu Bayle <sup>1</sup>,  
Yeong-Tarng Shieh <sup>2</sup>, Wei-Tsung Chuang <sup>3</sup>, Jem-Kun Chen <sup>4</sup>, Juin-Yih Lai <sup>1,5,6,7</sup> and Chih-Chia  
Cheng <sup>1,5,\*</sup>

<sup>1</sup> Graduate Institute of Applied Science and Technology, National Taiwan University of Science and Technology, Taipei 10607, Taiwan. E-mail: cccheng@mail.ntust.edu.tw.

<sup>2</sup> Department of Chemical and Materials Engineering, National University of Kaohsiung, Kaohsiung 81148, Taiwan.

<sup>3</sup> National Synchrotron Radiation Research Center, Hsinchu 30076, Taiwan.

<sup>4</sup> Department of Materials Science and Engineering, National Taiwan University of Science and Technology, Taipei 10607, Taiwan.

<sup>5</sup> Advanced Membrane Materials Research Center, National Taiwan University of Science and Technology, Taipei 10607, Taiwan.

<sup>6</sup> R&D Center for Membrane Technology, Chung Yuan Christian University, Chungli, Taoyuan 32023, Taiwan.

<sup>7</sup> Department of Chemical Engineering and Materials Science, Yuan Ze University, Chungli, Taoyuan 32003, Taiwan.

\* Corresponding Author

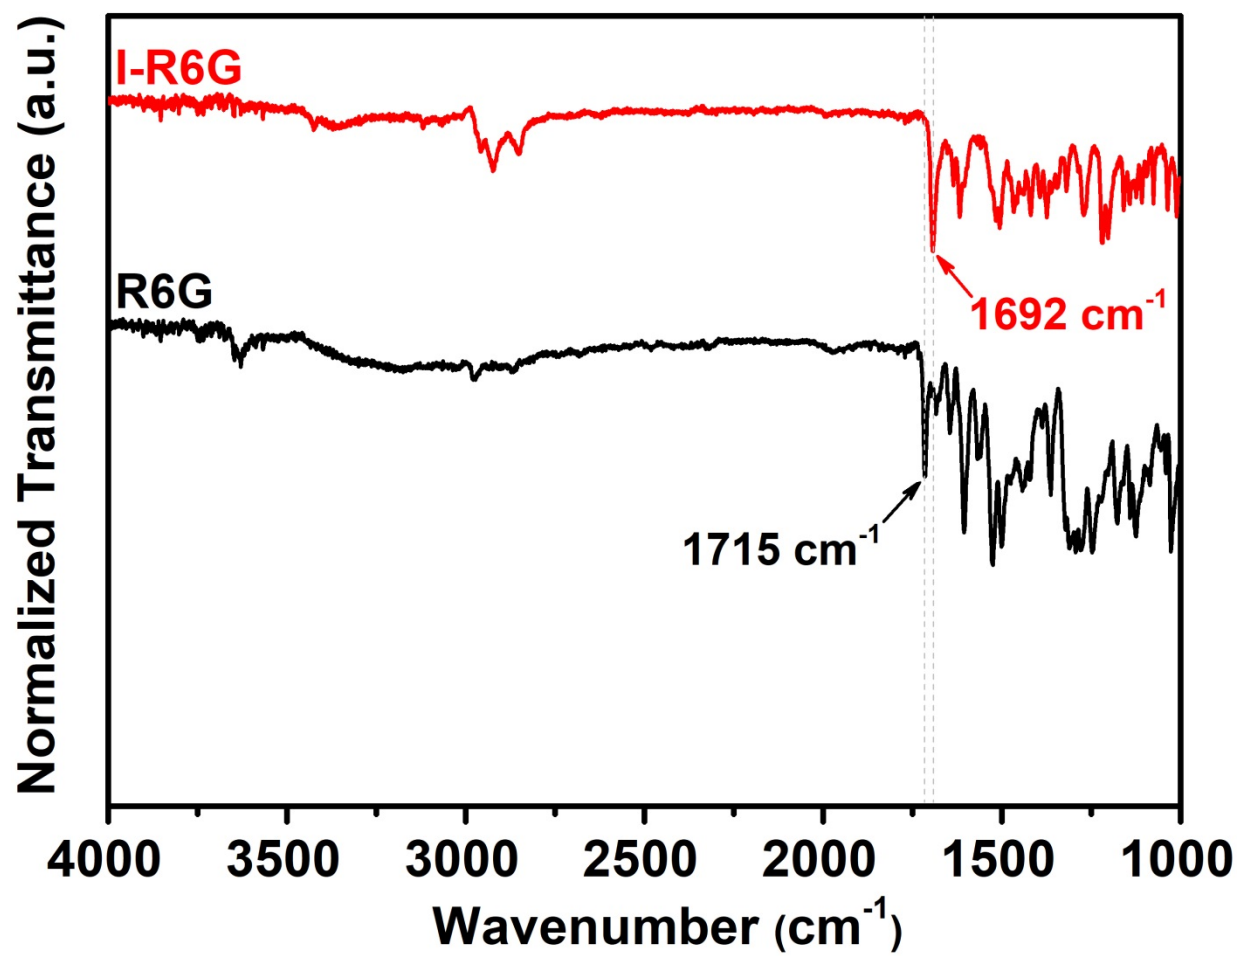

Figure S1: FTIR spectra of R6G and I-R6G at 25 °C.

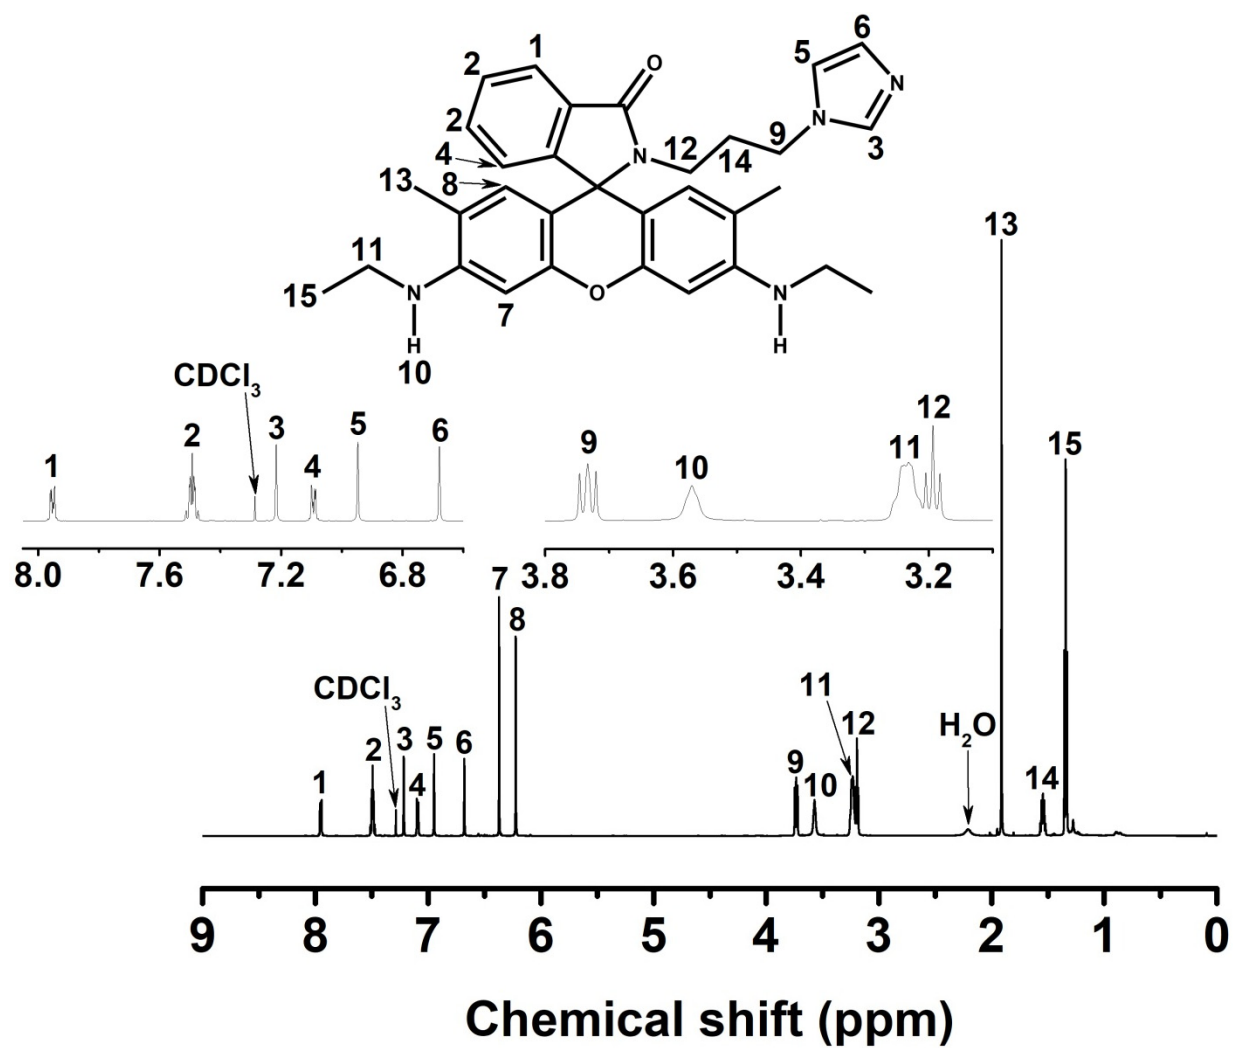

**Figure S2:**  $^1\text{H}$ -NMR spectrum of I-R6G in deuterated chloroform ( $\text{CDCl}_3$ ) obtained at 25  $^\circ\text{C}$ .

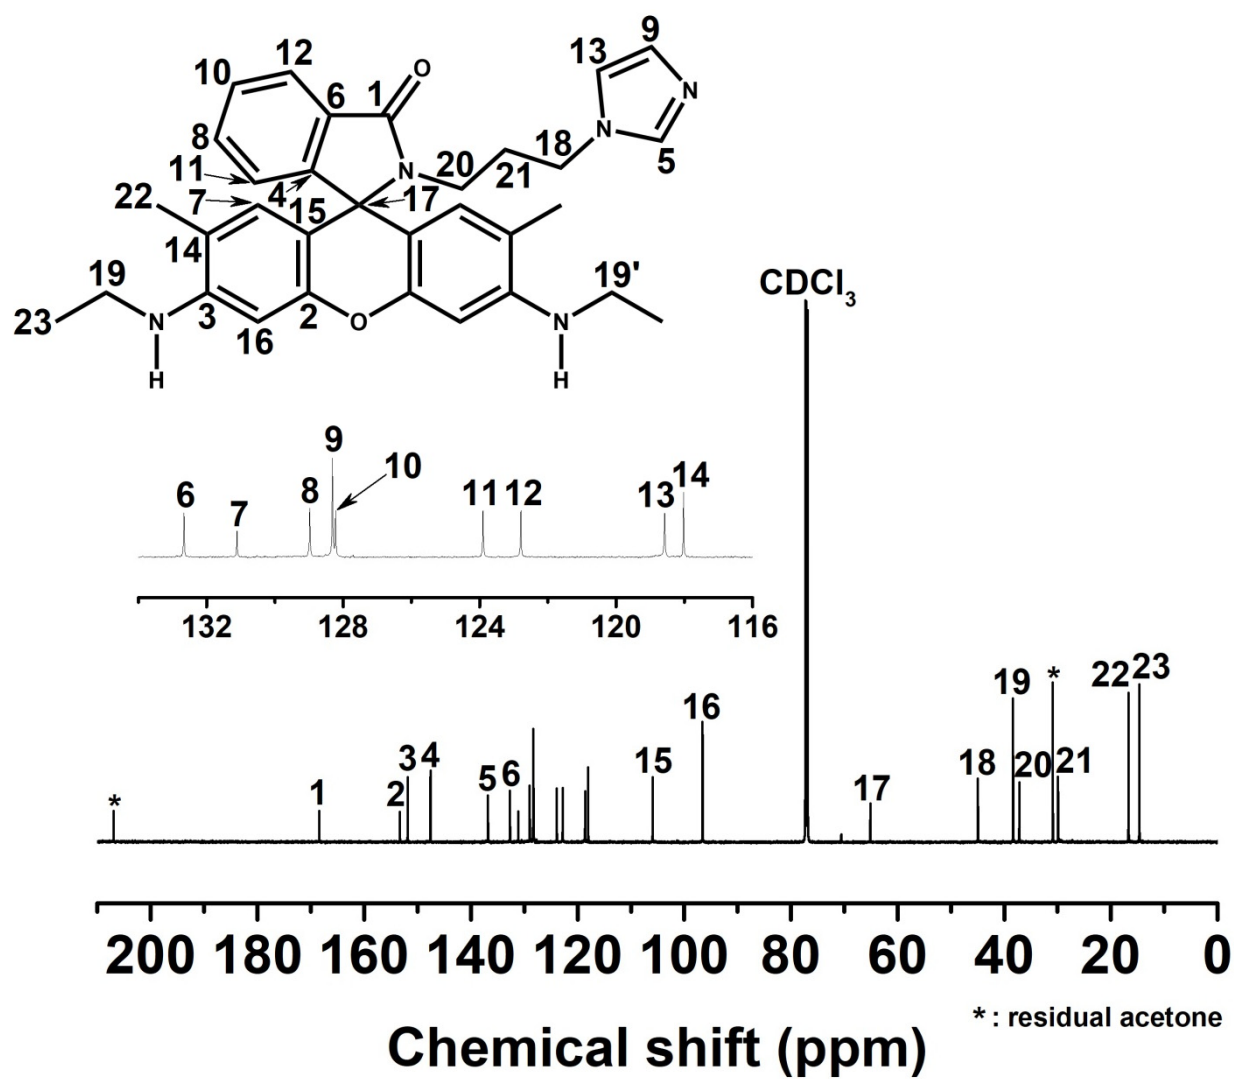

**Figure S3:**  $^{13}\text{C}$ -NMR spectrum of I-R6G in  $\text{CDCl}_3$  obtained at 25 °C.

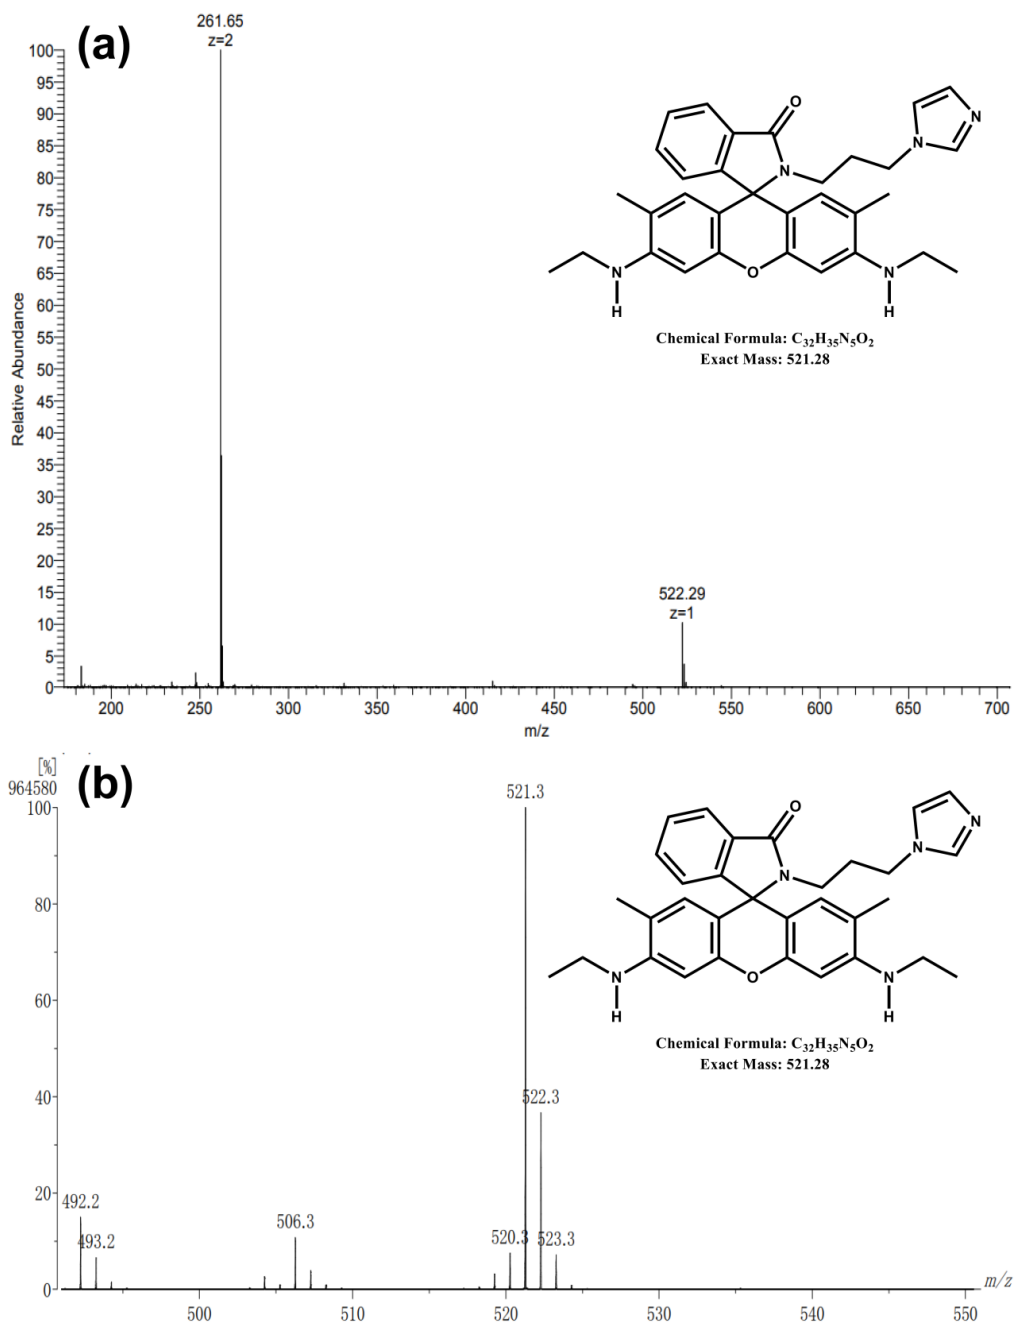

**Figure S4:** (a) Low- and (b) high-resolution mass spectra of I-R6G.

**Table S1:** Elemental content of I-R6G.

| Compound | C (%)       | H (%)  | N (%) |
|----------|-------------|--------|-------|
| I-R6G    | Found       | 72.014 | 6.758 |
|          | Theoretical | 72.08  | 6.95  |

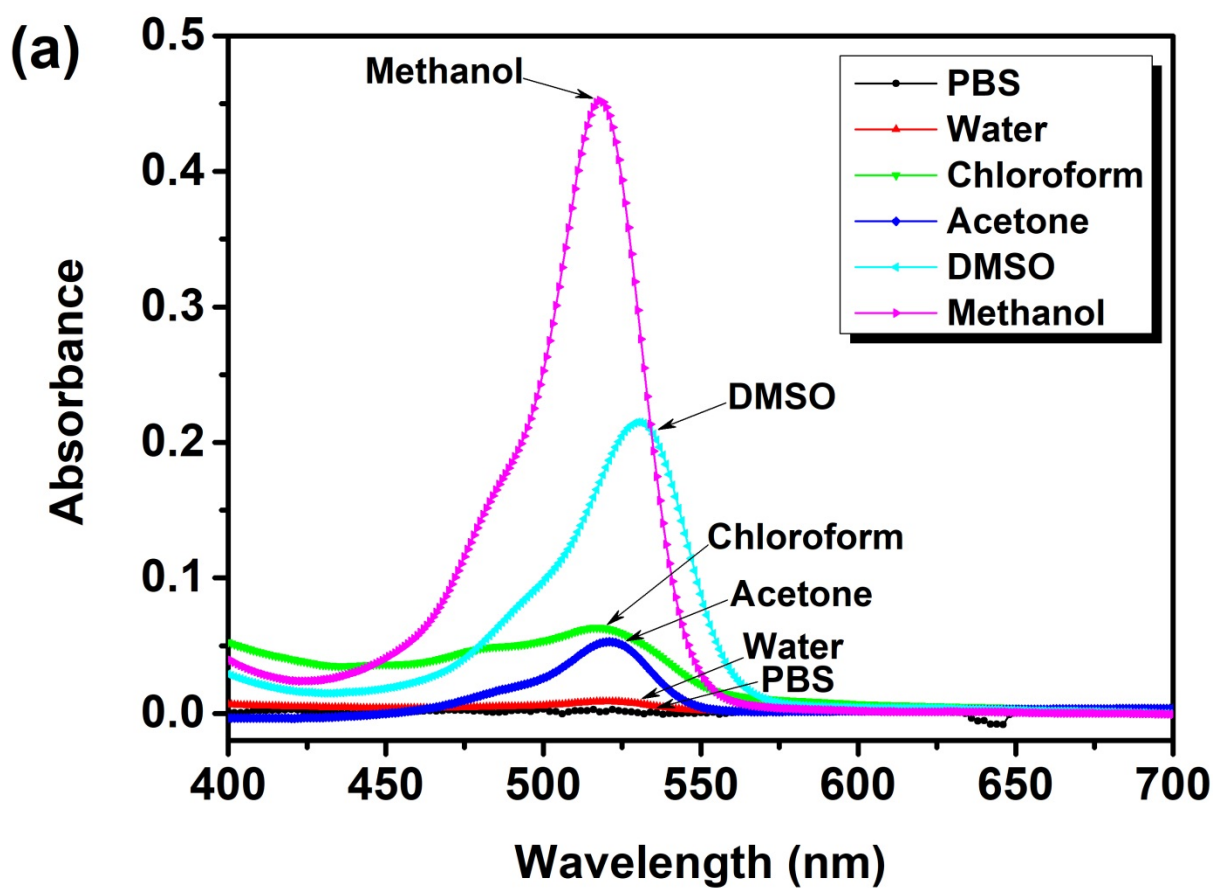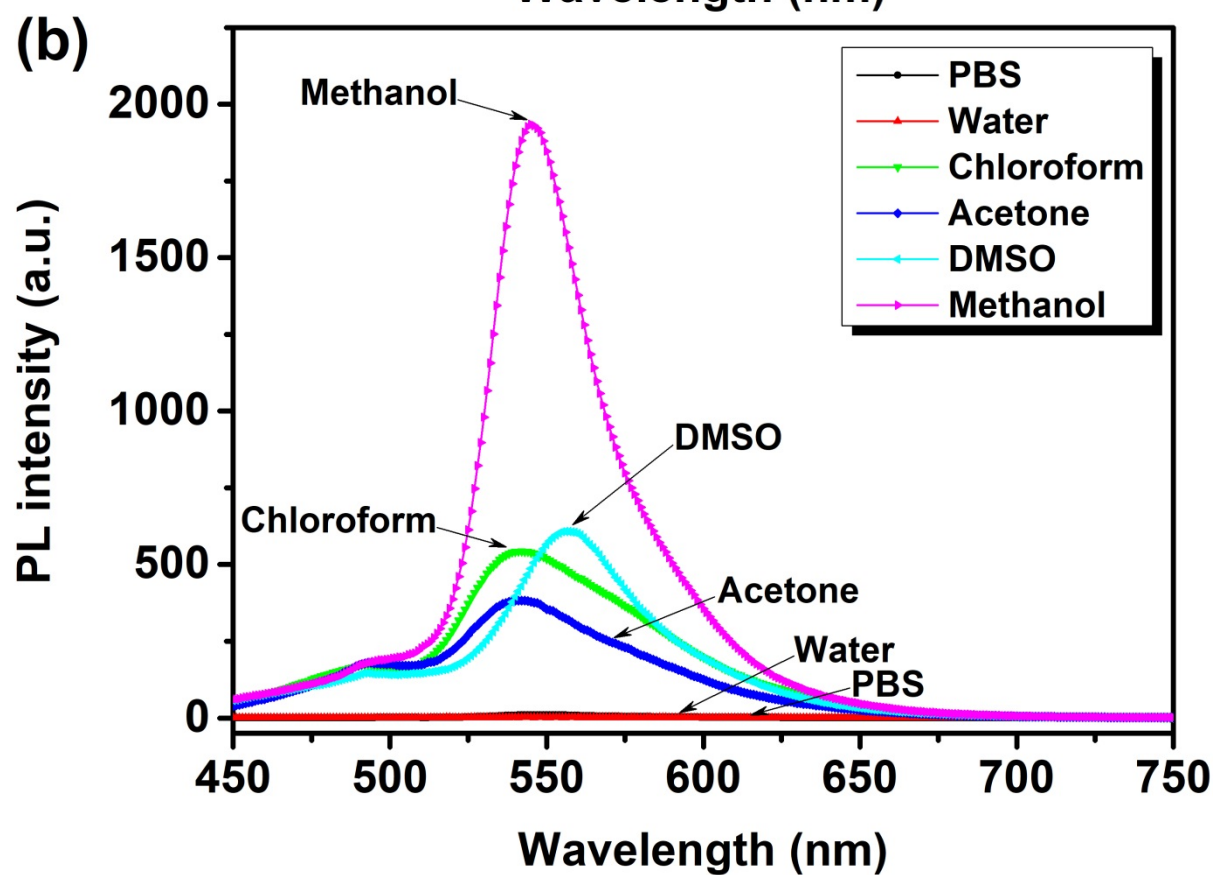

Figure S5: (a) UV-Vis and (b) PL spectra of I-R6G in various solvents at 25 °C.

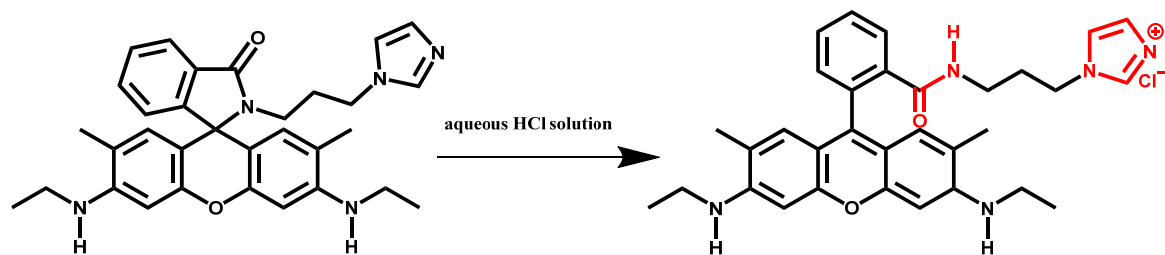

**Scheme S1:** Chemical opening of the spirocyclic lactam ring of I-R6G to the ring-opened amide form under acidic conditions.

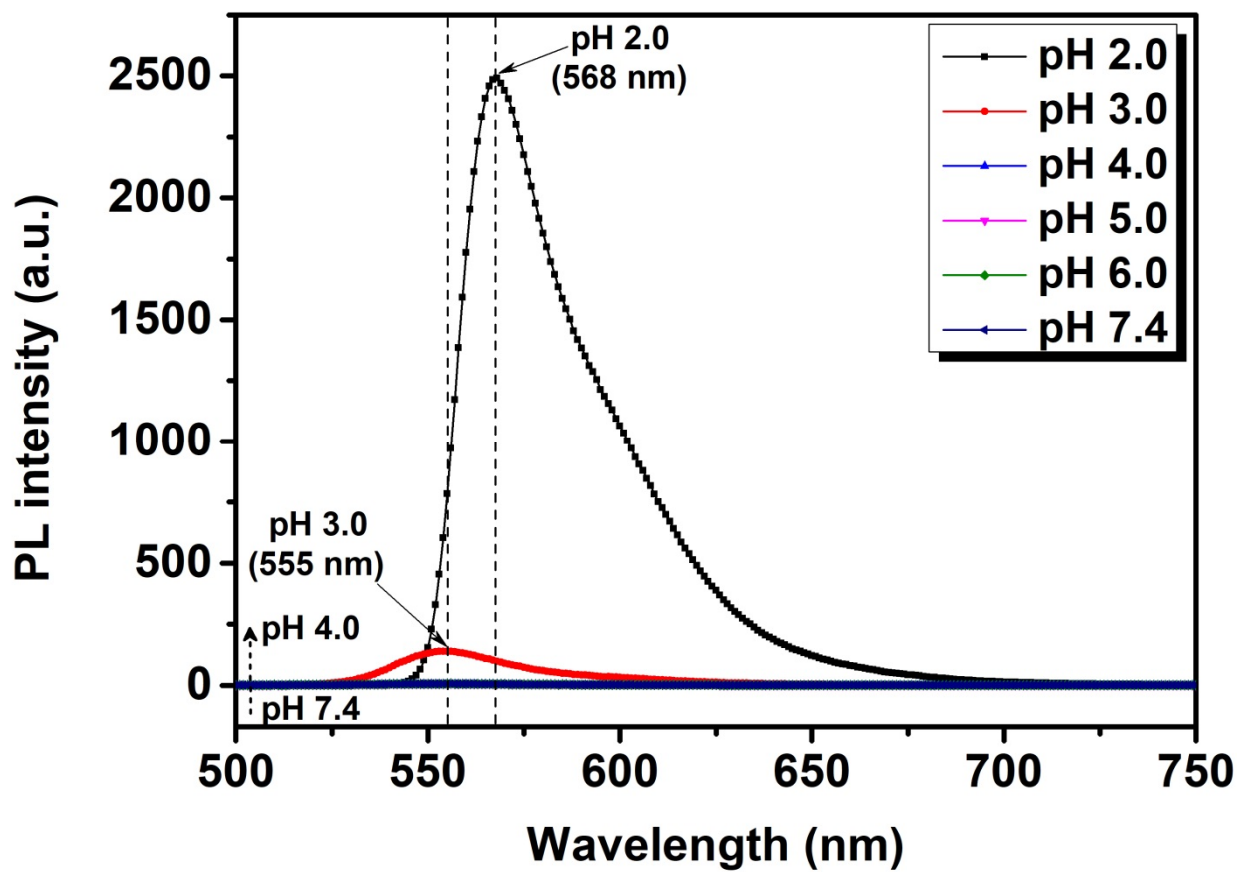

**Figure S6:** PL spectra of aqueous I-R6G solution in solutions with various pH values at 25 °C.



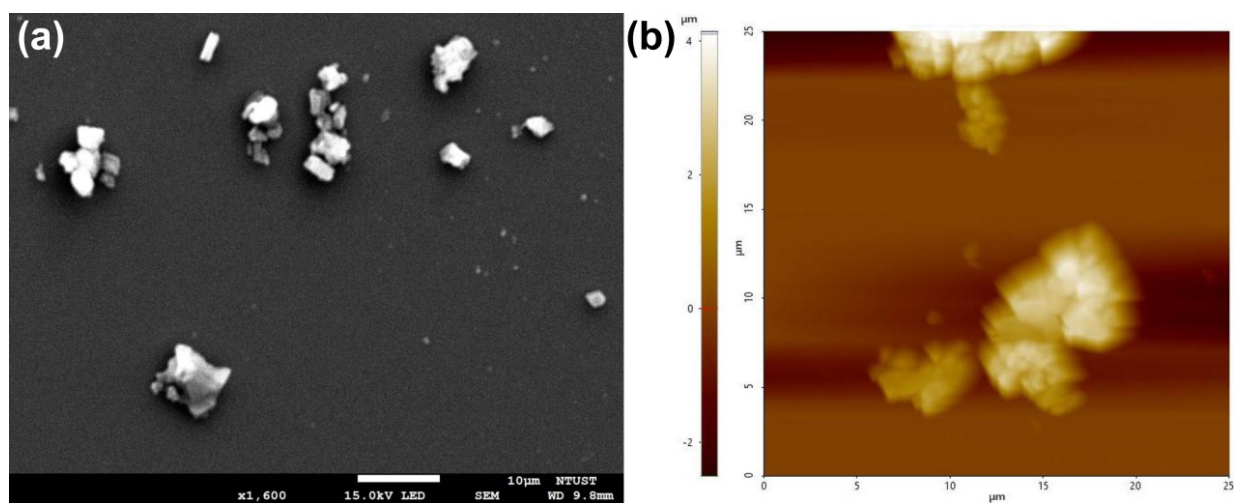

**Figure S7:** (a) SEM and (b) AFM images of spin-coated 1-R6G thin films obtained at 25 °C.

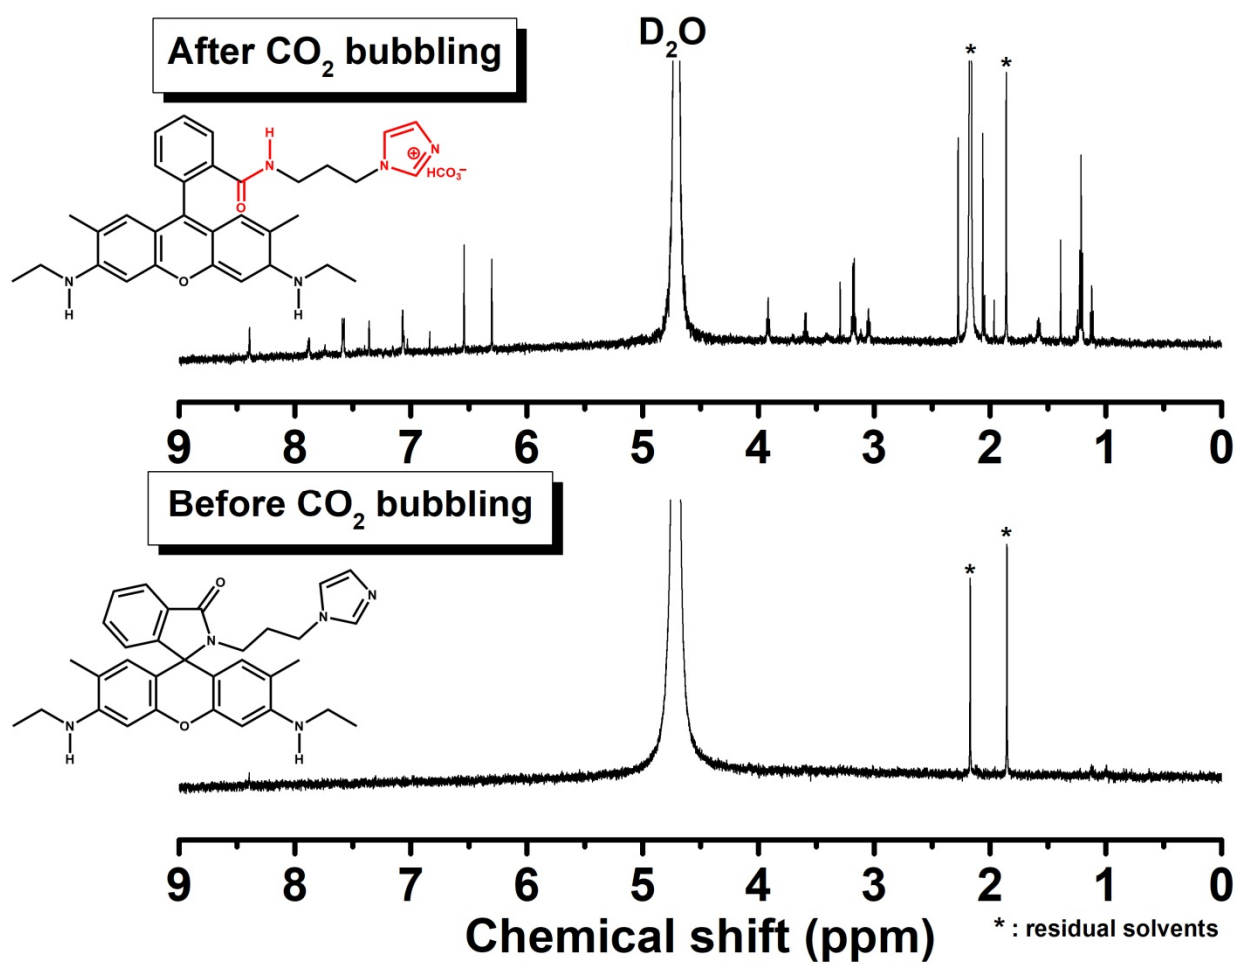

**Figure S8:** <sup>1</sup>H-NMR spectra of I-R6G (0.1 mg/mL) in deuterium oxide (D<sub>2</sub>O) before and after CO<sub>2</sub> bubbling at 25 °C.

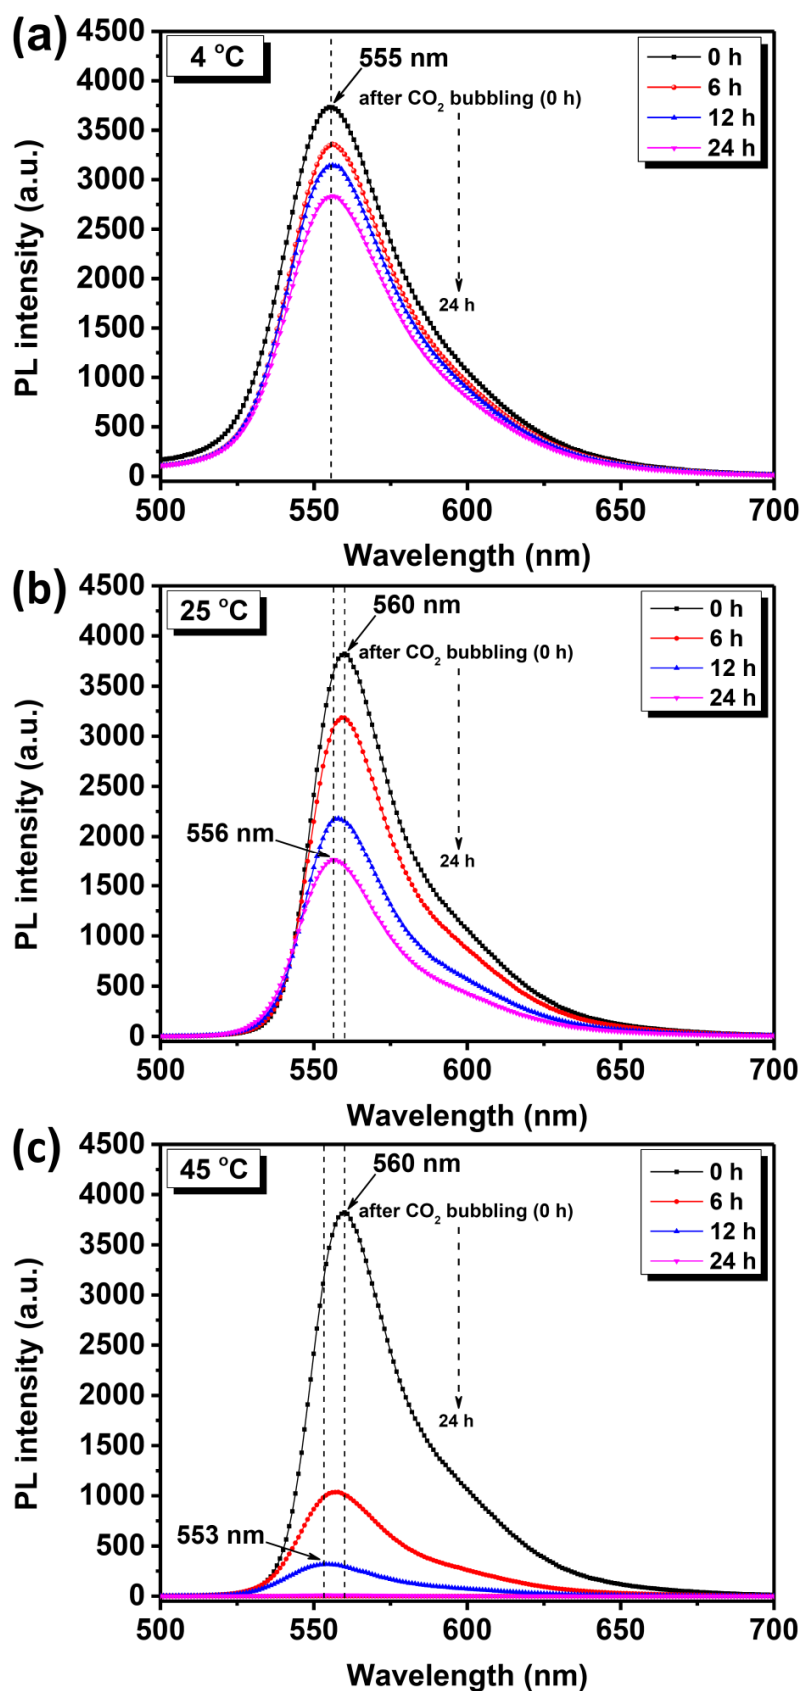

**Figure S9:** PL spectra of 0.1 mg/mL CO<sub>2</sub>-bubbled I-R6G in water at (a) 4 °C, (b) 25 °C and (c) 45 °C over time.

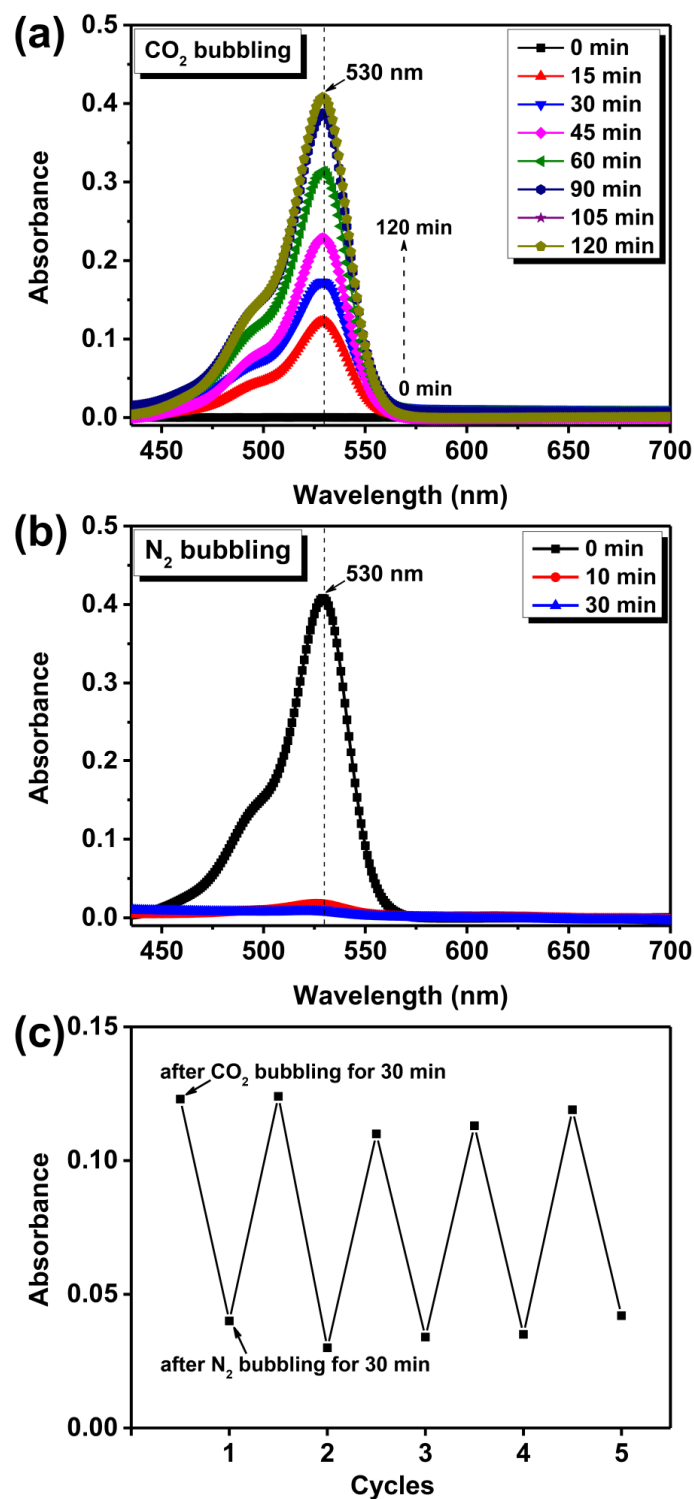

**Figure S10:** (a) UV-Vis spectra of I-R6G (0.01 mg/mL) in water after CO<sub>2</sub> bubbling over time at 25 °C. (b) UV-Vis spectra of CO<sub>2</sub>-treated I-R6G (0.01 mg/mL) in water after N<sub>2</sub> bubbling over time at 25 °C. (c) Reversible changes in the absorption intensity of aqueous I-R6G solution (0.01 mg/mL) upon five alternating cycles of CO<sub>2</sub>/N<sub>2</sub> bubbling at 25 °C; each cycle lasted 1 h, with CO<sub>2</sub> and N<sub>2</sub> bubbling for 30 min each.

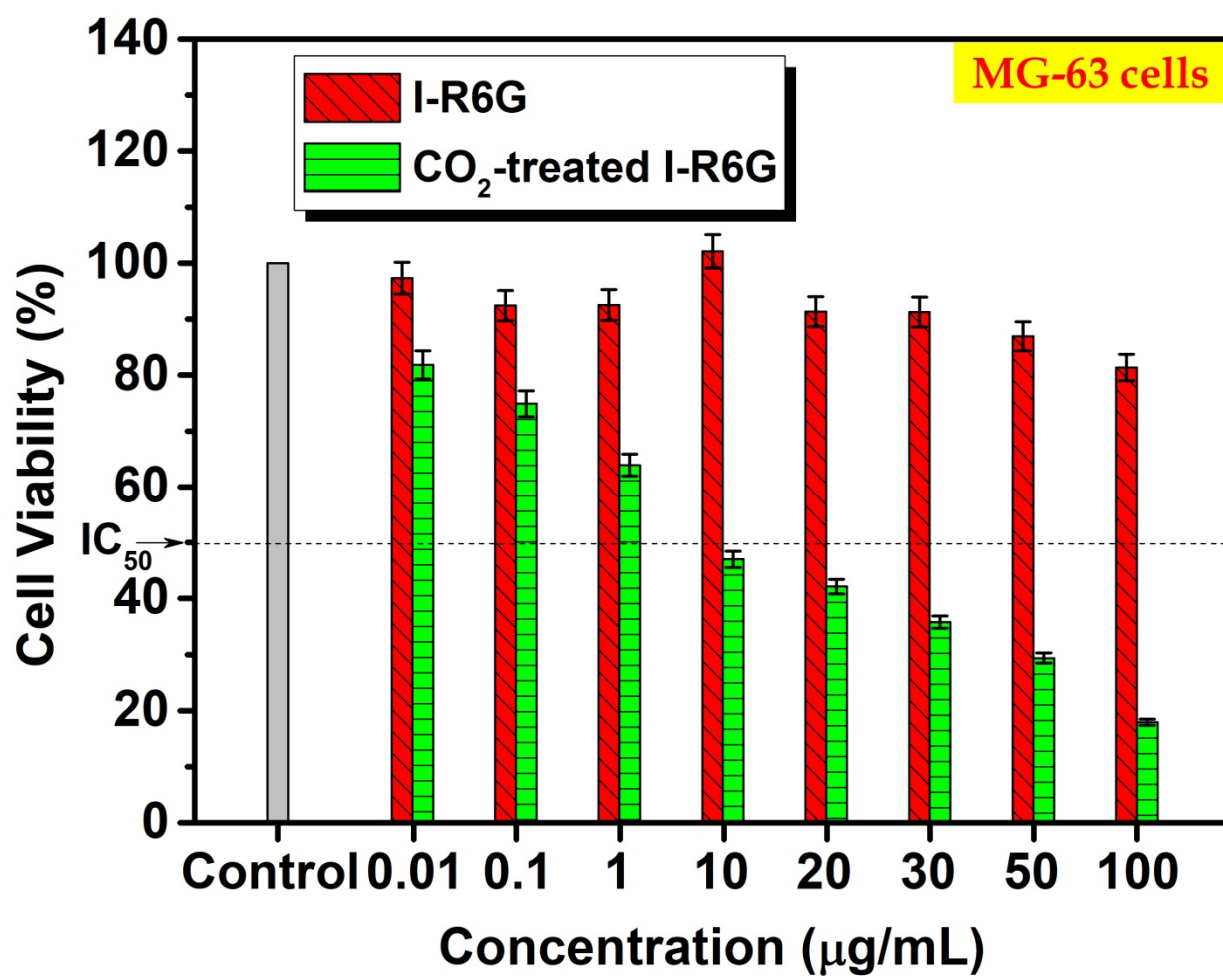

**Figure S11:** Cell viability of MG-63 cells *in vitro* after incubation with varying concentrations of pristine or CO<sub>2</sub>-treated I-R6G (0.01–100 μg/mL) for 24 h.

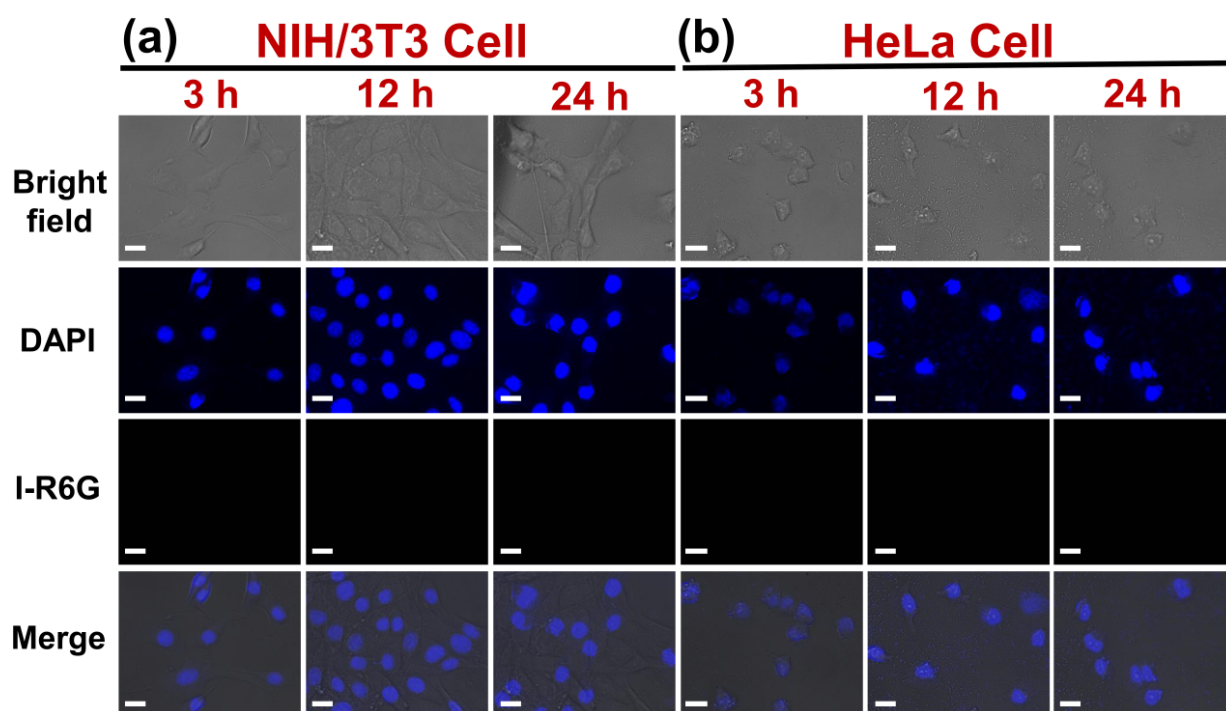

**Figure S12:** CLSM images of **(a)** NIH/3T3 and **(b)** HeLa cells cultured with pristine I-R6G at 37 °C for 3, 12 or 24 h. The scale bar in each image represents 20  $\mu\text{m}$ .

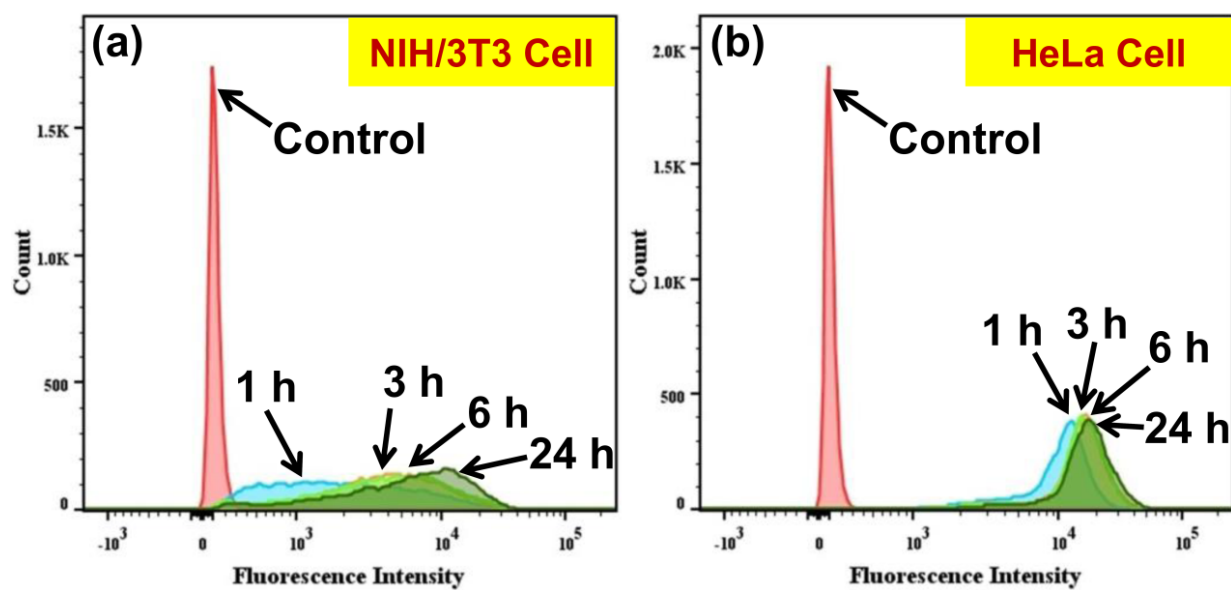

**Figure S13:** Flow cytometry histogram profiles of (a) NIH/3T3 and (b) HeLa cells cultured with R6G at 37 °C for 1, 3, 6 or 24 h.

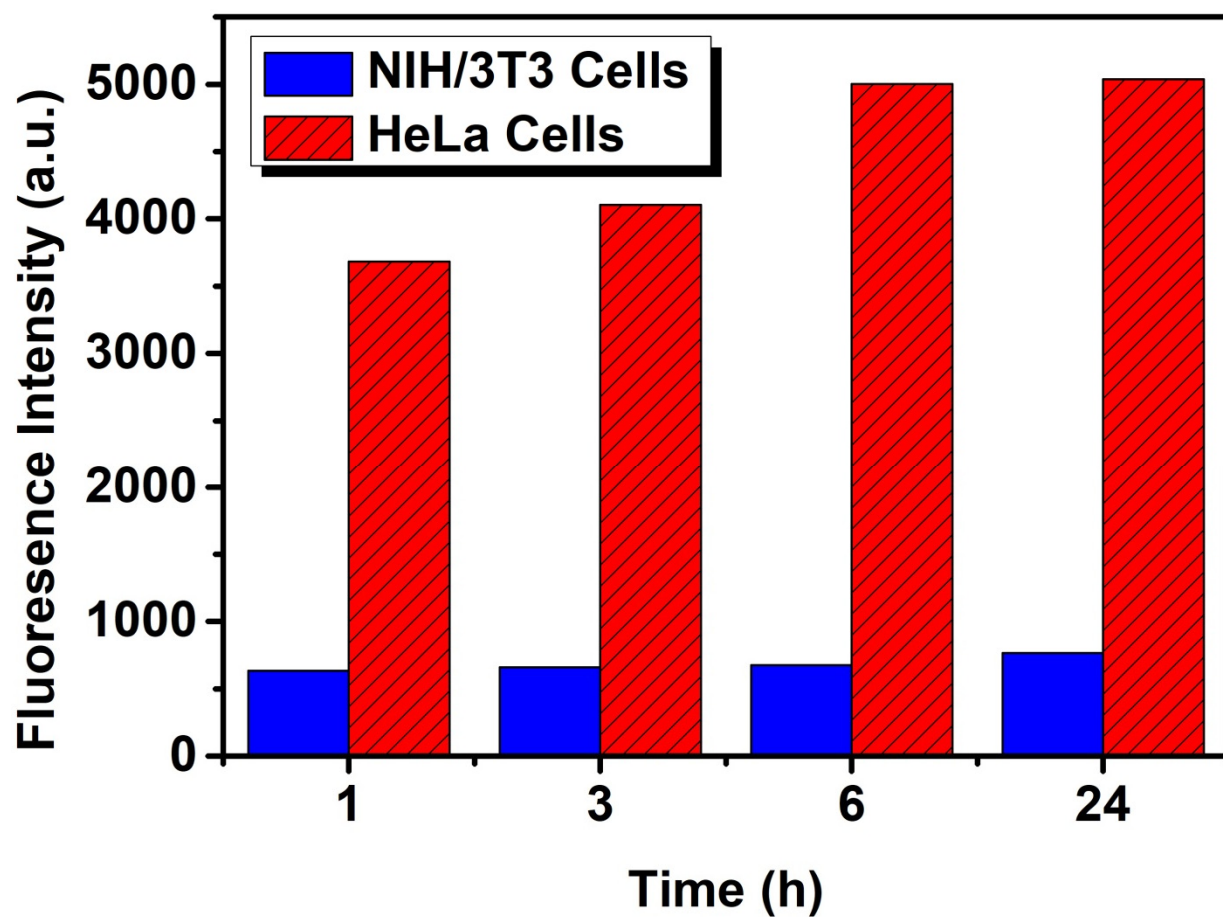

**Figure S14:** Flow cytometric analysis of the changes in the fluorescence intensities of NIH/3T3 and HeLa cells incubated with CO<sub>2</sub>-treated I-R6G at 37 °C for 1, 3, 6 or 24 h.



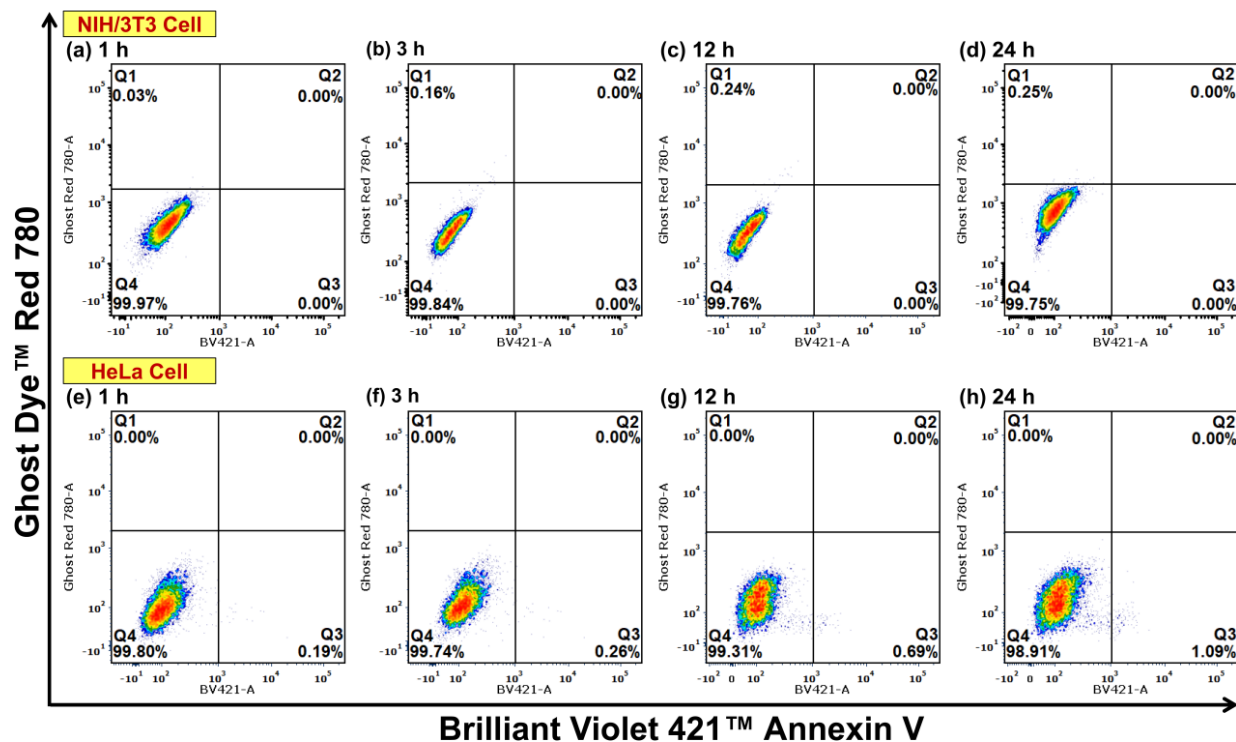

**Figure S15:** Representative dot plot diagrams generated by flow-cytometric analysis of (a–d) NIH/3T3 and (e–h) HeLa cells incubated with pristine I-R6G at 37 °C 1, 3, 12 or 24 h, then double stained with BV421 Annexin V and GDR-780.
