# Supplementary material for: A CO2-Responsive Imidazole-Functionalized Fluorescent Material Mediates Cancer Chemotherapy
Source: Pharmaceutics. 2023 Jan 20;15(2):354. doi: 10.3390/pharmaceutics15020354 (PMC9959563; doi:10.3390/pharmaceutics15020354)
Supplement: Supplementary file 1 [file pharmaceutics-15-00354-s001.zip › X-ray crystallographic data for I-R6G at 100 K (CIF).cif]

 
data_ic21148 
  
_audit_creation_method            'SHELXL-2018/3' 
_shelx_SHELXL_version_number      '2018/3' 
_chemical_name_systematic         ? 
_chemical_name_common             ? 
_chemical_melting_point           ? 
_chemical_formula_moiety          ? 
_chemical_formula_sum 
 'C32 H35 N5 O2' 
_chemical_formula_weight          521.65 
  
loop_ 
 _atom_type_symbol 
 _atom_type_description 
 _atom_type_scat_dispersion_real 
 _atom_type_scat_dispersion_imag 
 _atom_type_scat_source 
 'C'  'C'   0.0033   0.0016 
 'International Tables Vol C Tables 4.2.6.8 and 6.1.1.4' 
 'H'  'H'   0.0000   0.0000 
 'International Tables Vol C Tables 4.2.6.8 and 6.1.1.4' 
 'N'  'N'   0.0061   0.0033 
 'International Tables Vol C Tables 4.2.6.8 and 6.1.1.4' 
 'O'  'O'   0.0106   0.0060 
 'International Tables Vol C Tables 4.2.6.8 and 6.1.1.4' 
  
_space_group_crystal_system       monoclinic 
_space_group_IT_number            14 
_space_group_name_H-M_alt         'P 21/c' 
_space_group_name_Hall            '-P 2ybc' 
  
_shelx_space_group_comment 
; 
The symmetry employed for this shelxl refinement is uniquely defined 
by the following loop, which should always be used as a source of 
symmetry information in preference to the above space-group names. 
They are only intended as comments. 
; 
  
loop_ 
 _space_group_symop_operation_xyz 
 'x, y, z' 
 '-x, y+1/2, -z+1/2' 
 '-x, -y, -z' 
 'x, -y-1/2, z-1/2' 
  
_cell_length_a                    17.917(11) 
_cell_length_b                    9.196(3) 
_cell_length_c                    17.827(8) 
_cell_angle_alpha                 90 
_cell_angle_beta                  110.20(7) 
_cell_angle_gamma                 90 
_cell_volume                      2756(3) 
_cell_formula_units_Z             4 
_cell_measurement_temperature     100(2) 
_cell_measurement_reflns_used     503 
_cell_measurement_theta_min       3.2250 
_cell_measurement_theta_max       24.7270 
  
_exptl_crystal_description        plate 
_exptl_crystal_colour             ? 
_exptl_crystal_density_meas       ? 
_exptl_crystal_density_method     ? 
_exptl_crystal_density_diffrn     1.257 
_exptl_crystal_F_000              1112 
_exptl_transmission_factor_min    ? 
_exptl_transmission_factor_max    ? 
_exptl_crystal_size_max           0.20 
_exptl_crystal_size_mid           0.15 
_exptl_crystal_size_min           0.10 
_exptl_absorpt_coefficient_mu     0.080 
_shelx_estimated_absorpt_T_min    ? 
_shelx_estimated_absorpt_T_max    ? 
_exptl_absorpt_correction_type    multi-scan 
_exptl_absorpt_correction_T_min   0.98417 
_exptl_absorpt_correction_T_max   1.00000 
_exptl_absorpt_process_details     
; 
CrysAlisPro 1.171.39.46 (Rigaku Oxford Diffraction, 2018) 
Empirical absorption correction using spherical harmonics, 
 implemented in SCALE3 ABSPACK scaling algorithm. 
; 
_exptl_absorpt_special_details    ? 
_diffrn_ambient_temperature       100(2) 
_diffrn_radiation_wavelength      0.71073 
_diffrn_radiation_type            MoK\a 
_diffrn_source                    'fine-focus sealed X-ray tube' 
_diffrn_measurement_device_type   'Xcalibur, Atlas, Gemini' 
_diffrn_measurement_method        '\w scans' 
_diffrn_detector_area_resol_mean  10.2496 
_diffrn_reflns_number             11524 
_diffrn_reflns_av_unetI/netI      0.4886 
_diffrn_reflns_av_R_equivalents   0.2352 
_diffrn_reflns_limit_h_min        -15 
_diffrn_reflns_limit_h_max        23 
_diffrn_reflns_limit_k_min        -11 
_diffrn_reflns_limit_k_max        11 
_diffrn_reflns_limit_l_min        -22 
_diffrn_reflns_limit_l_max        23 
_diffrn_reflns_theta_min          3.198 
_diffrn_reflns_theta_max          27.500 
_diffrn_reflns_theta_full         25.242 
_diffrn_measured_fraction_theta_max   0.989 
_diffrn_measured_fraction_theta_full  0.994 
_diffrn_reflns_Laue_measured_fraction_max    0.989 
_diffrn_reflns_Laue_measured_fraction_full   0.994 
_diffrn_reflns_point_group_measured_fraction_max   0.989 
_diffrn_reflns_point_group_measured_fraction_full  0.994 
_reflns_number_total              6253 
_reflns_number_gt                 1636 
_reflns_threshold_expression      'I > 2\s(I)' 
_reflns_Friedel_coverage          0.000 
_reflns_Friedel_fraction_max      . 
_reflns_Friedel_fraction_full     . 
  
_reflns_special_details 
; 
 Reflections were merged by SHELXL according to the crystal 
 class for the calculation of statistics and refinement. 
  
 _reflns_Friedel_fraction is defined as the number of unique 
 Friedel pairs measured divided by the number that would be 
 possible theoretically, ignoring centric projections and 
 systematic absences. 
; 
  
_computing_data_collection        'CrysAlisPro 1.171.39.46 (Rigaku OD, 2018)' 
_computing_cell_refinement        'CrysAlisPro 1.171.39.46 (Rigaku OD, 2018)' 
_computing_data_reduction         'CrysAlisPro 1.171.39.46 (Rigaku OD, 2018)' 
_computing_structure_solution     ? 
_computing_structure_refinement 'SHELXL-2018/3 (Sheldrick, 2018)' 
_computing_molecular_graphics     ? 
_computing_publication_material   ? 
_refine_special_details           ? 
_refine_ls_structure_factor_coef  Fsqd 
_refine_ls_matrix_type            full 
_refine_ls_weighting_scheme       calc 
_refine_ls_weighting_details 
'w=1/[\s^2^(Fo^2^)+(0.1000P)^2^] where P=(Fo^2^+2Fc^2^)/3' 
_atom_sites_solution_primary      ? 
_atom_sites_solution_secondary    ? 
_atom_sites_solution_hydrogens    mixed 
_refine_ls_hydrogen_treatment     mixed 
_refine_ls_extinction_method      none 
_refine_ls_extinction_coef        . 
_refine_ls_number_reflns          6253 
_refine_ls_number_parameters      358 
_refine_ls_number_restraints      0 
_refine_ls_R_factor_all           0.3782 
_refine_ls_R_factor_gt            0.1160 
_refine_ls_wR_factor_ref          0.3735 
_refine_ls_wR_factor_gt           0.2211 
_refine_ls_goodness_of_fit_ref    0.980 
_refine_ls_restrained_S_all       0.980 
_refine_ls_shift/su_max           0.001 
_refine_ls_shift/su_mean          0.000 
  
loop_ 
 _atom_site_label 
 _atom_site_type_symbol 
 _atom_site_fract_x 
 _atom_site_fract_y 
 _atom_site_fract_z 
 _atom_site_U_iso_or_equiv 
 _atom_site_adp_type 
 _atom_site_occupancy 
 _atom_site_site_symmetry_order 
 _atom_site_calc_flag 
 _atom_site_refinement_flags_posn 
 _atom_site_refinement_flags_adp 
 _atom_site_refinement_flags_occupancy 
 _atom_site_disorder_assembly 
 _atom_site_disorder_group 
O1 O 0.2220(3) 0.3200(5) 0.3006(3) 0.0316(14) Uani 1 1 d . . . . . 
O2 O 0.3064(3) 0.9892(6) 0.3356(3) 0.0399(16) Uani 1 1 d . . . . . 
N1 N 0.1106(4) 0.3527(7) 0.0205(4) 0.0329(18) Uani 1 1 d . . . . . 
H1 H 0.091(5) 0.406(9) -0.021(5) 0.049 Uiso 1 1 d . U . . . 
N2 N 0.3187(4) 0.2245(7) 0.5778(4) 0.037(2) Uani 1 1 d . . . . . 
H2 H 0.326(5) 0.263(9) 0.622(5) 0.055 Uiso 1 1 d . U . . . 
N3 N 0.2833(4) 0.7430(6) 0.3298(4) 0.0293(17) Uani 1 1 d . . . . . 
N4 N 0.4717(4) 0.4504(7) 0.3462(4) 0.0300(17) Uani 1 1 d . . . . . 
N5 N 0.4399(4) 0.2885(7) 0.2479(4) 0.0411(19) Uani 1 1 d . . . . . 
C1 C 0.1957(5) 0.4103(8) 0.2362(5) 0.027(2) Uani 1 1 d . . . . . 
C2 C 0.1699(5) 0.3424(8) 0.1631(5) 0.029(2) Uani 1 1 d . . . . . 
H2A H 0.172936 0.239498 0.160692 0.035 Uiso 1 1 calc R U . . . 
C3 C 0.1394(5) 0.4213(8) 0.0926(5) 0.029(2) Uani 1 1 d . . . . . 
C4 C 0.1410(5) 0.5748(8) 0.0973(4) 0.028(2) Uani 1 1 d . . . . . 
C5 C 0.1669(5) 0.6384(8) 0.1710(5) 0.0270(19) Uani 1 1 d . . . . . 
H5A H 0.166702 0.741571 0.173702 0.032 Uiso 1 1 calc R U . . . 
C6 C 0.1936(5) 0.5605(7) 0.2427(5) 0.0262(19) Uani 1 1 d . . . . . 
C7 C 0.2180(5) 0.6367(7) 0.3222(4) 0.0250(19) Uani 1 1 d . . . . . 
C8 C 0.2414(4) 0.5272(7) 0.3893(4) 0.0230(19) Uani 1 1 d . . . . . 
C9 C 0.2637(5) 0.5699(8) 0.4695(4) 0.0256(19) Uani 1 1 d . . . . . 
H9A H 0.260888 0.670227 0.480976 0.031 Uiso 1 1 calc R U . . . 
C10 C 0.2897(5) 0.4728(8) 0.5333(4) 0.028(2) Uani 1 1 d . . . . . 
C11 C 0.2949(5) 0.3222(8) 0.5165(4) 0.0257(19) Uani 1 1 d . . . . . 
C12 C 0.2722(5) 0.2793(8) 0.4376(5) 0.033(2) Uani 1 1 d . . . . . 
H12A H 0.275292 0.179373 0.425472 0.039 Uiso 1 1 calc R U . . . 
C13 C 0.2449(5) 0.3791(8) 0.3753(4) 0.0252(19) Uani 1 1 d . . . . . 
C14 C 0.1130(5) 0.6663(8) 0.0223(4) 0.034(2) Uani 1 1 d . . . . . 
H14A H 0.096797 0.602688 -0.024684 0.051 Uiso 1 1 calc R U . . . 
H14B H 0.067715 0.725985 0.022333 0.051 Uiso 1 1 calc R U . . . 
H14C H 0.156422 0.729650 0.020642 0.051 Uiso 1 1 calc R U . . . 
C15 C 0.3097(5) 0.5253(8) 0.6176(5) 0.040(2) Uani 1 1 d . . . . . 
H15A H 0.326873 0.442815 0.654393 0.059 Uiso 1 1 calc R U . . . 
H15B H 0.352727 0.596976 0.629591 0.059 Uiso 1 1 calc R U . . . 
H15C H 0.262660 0.570271 0.623867 0.059 Uiso 1 1 calc R U . . . 
C16 C 0.0957(5) 0.1976(9) 0.0114(5) 0.040(2) Uani 1 1 d . . . . . 
H16A H 0.062911 0.168009 0.043510 0.048 Uiso 1 1 calc R U . . . 
H16B H 0.146953 0.144868 0.032197 0.048 Uiso 1 1 calc R U . . . 
C17 C 0.0540(5) 0.1560(9) -0.0739(5) 0.043(2) Uani 1 1 d . . . . . 
H17A H 0.045035 0.050743 -0.077497 0.064 Uiso 1 1 calc R U . . . 
H17B H 0.002771 0.206618 -0.094361 0.064 Uiso 1 1 calc R U . . . 
H17C H 0.086782 0.183485 -0.105670 0.064 Uiso 1 1 calc R U . . . 
C18 C 0.3253(5) 0.0684(8) 0.5658(5) 0.038(2) Uani 1 1 d . . . . . 
H18A H 0.277796 0.036034 0.521076 0.046 Uiso 1 1 calc R U . . . 
H18B H 0.325616 0.016310 0.614503 0.046 Uiso 1 1 calc R U . . . 
C19 C 0.3996(6) 0.0261(9) 0.5475(6) 0.053(3) Uani 1 1 d . . . . . 
H19A H 0.400335 -0.079430 0.540189 0.080 Uiso 1 1 calc R U . . . 
H19B H 0.399204 0.075179 0.498597 0.080 Uiso 1 1 calc R U . . . 
H19C H 0.447076 0.055434 0.592124 0.080 Uiso 1 1 calc R U . . . 
C20 C 0.1528(5) 0.7405(8) 0.3255(4) 0.0268(19) Uani 1 1 d . . . . . 
C21 C 0.0758(5) 0.7091(8) 0.3213(5) 0.032(2) Uani 1 1 d . . . . . 
H21A H 0.058066 0.611475 0.319754 0.038 Uiso 1 1 calc R U . . . 
C22 C 0.0252(5) 0.8259(9) 0.3193(4) 0.035(2) Uani 1 1 d . . . . . 
H22A H -0.028050 0.806843 0.315870 0.042 Uiso 1 1 calc R U . . . 
C23 C 0.0508(6) 0.9688(9) 0.3224(5) 0.040(2) Uani 1 1 d . . . . . 
H23A H 0.015200 1.045860 0.321679 0.048 Uiso 1 1 calc R U . . . 
C24 C 0.1271(5) 1.0002(8) 0.3263(5) 0.034(2) Uani 1 1 d . . . . . 
H24A H 0.144505 1.097901 0.327129 0.041 Uiso 1 1 calc R U . . . 
C25 C 0.1782(5) 0.8840(8) 0.3291(4) 0.0267(19) Uani 1 1 d . . . . . 
C26 C 0.2626(5) 0.8839(8) 0.3319(4) 0.031(2) Uani 1 1 d . . . . . 
C27 C 0.3582(5) 0.6973(8) 0.3219(5) 0.029(2) Uani 1 1 d . . . . . 
H27A H 0.377126 0.775698 0.294881 0.035 Uiso 1 1 calc R U . . . 
H27B H 0.348100 0.610352 0.287078 0.035 Uiso 1 1 calc R U . . . 
C28 C 0.4233(5) 0.6619(8) 0.3999(5) 0.031(2) Uani 1 1 d . . . . . 
H28A H 0.402007 0.595955 0.431486 0.037 Uiso 1 1 calc R U . . . 
H28B H 0.440821 0.752564 0.430949 0.037 Uiso 1 1 calc R U . . . 
C29 C 0.4947(5) 0.5901(8) 0.3871(5) 0.033(2) Uani 1 1 d . . . . . 
H29A H 0.515741 0.654840 0.354661 0.040 Uiso 1 1 calc R U . . . 
H29B H 0.537292 0.574604 0.439340 0.040 Uiso 1 1 calc R U . . . 
C30 C 0.4684(5) 0.4194(8) 0.2711(5) 0.034(2) Uani 1 1 d . . . . . 
H30A H 0.484843 0.484787 0.238532 0.041 Uiso 1 1 calc R U . . . 
C31 C 0.4233(5) 0.2330(9) 0.3127(5) 0.040(2) Uani 1 1 d . . . . . 
H31A H 0.400628 0.140139 0.314174 0.048 Uiso 1 1 calc R U . . . 
C32 C 0.4442(5) 0.3312(9) 0.3742(5) 0.039(2) Uani 1 1 d . . . . . 
H32A H 0.440458 0.318888 0.425650 0.046 Uiso 1 1 calc R U . . . 
  
loop_ 
 _atom_site_aniso_label 
 _atom_site_aniso_U_11 
 _atom_site_aniso_U_22 
 _atom_site_aniso_U_33 
 _atom_site_aniso_U_23 
 _atom_site_aniso_U_13 
 _atom_site_aniso_U_12 
O1 0.050(4) 0.020(3) 0.022(3) 0.001(2) 0.009(3) 0.004(3) 
O2 0.049(4) 0.023(3) 0.053(4) -0.002(3) 0.024(3) -0.008(3) 
N1 0.043(5) 0.023(4) 0.026(4) 0.000(3) 0.004(4) 0.004(3) 
N2 0.048(5) 0.028(4) 0.033(4) 0.006(3) 0.013(4) 0.006(4) 
N3 0.030(5) 0.015(3) 0.044(4) 0.001(3) 0.014(4) -0.007(3) 
N4 0.039(5) 0.029(4) 0.023(4) -0.001(3) 0.012(3) -0.004(3) 
N5 0.057(6) 0.034(4) 0.035(4) -0.005(3) 0.019(4) -0.004(4) 
C1 0.029(6) 0.027(4) 0.029(5) 0.003(4) 0.014(4) -0.002(4) 
C2 0.032(6) 0.018(4) 0.034(5) -0.001(4) 0.007(4) 0.000(4) 
C3 0.035(6) 0.020(4) 0.033(5) -0.005(4) 0.013(4) -0.003(4) 
C4 0.041(6) 0.024(4) 0.022(5) 0.003(4) 0.014(4) 0.001(4) 
C5 0.031(5) 0.018(4) 0.034(5) -0.002(4) 0.014(4) -0.001(4) 
C6 0.030(6) 0.014(4) 0.037(5) -0.005(4) 0.014(4) -0.002(4) 
C7 0.036(6) 0.012(4) 0.024(4) 0.003(3) 0.007(4) 0.009(4) 
C8 0.027(5) 0.018(4) 0.023(4) -0.002(3) 0.007(4) 0.000(3) 
C9 0.032(6) 0.021(4) 0.027(5) -0.003(4) 0.014(4) 0.002(4) 
C10 0.035(6) 0.025(4) 0.025(5) -0.002(4) 0.012(4) 0.001(4) 
C11 0.032(6) 0.023(4) 0.023(5) -0.003(4) 0.011(4) 0.003(4) 
C12 0.037(6) 0.020(4) 0.043(6) -0.001(4) 0.017(5) -0.002(4) 
C13 0.026(5) 0.025(4) 0.023(5) 0.000(4) 0.006(4) -0.005(4) 
C14 0.045(6) 0.027(4) 0.030(5) 0.003(4) 0.012(4) 0.005(4) 
C15 0.052(7) 0.032(5) 0.035(5) -0.001(4) 0.014(5) -0.003(4) 
C16 0.045(7) 0.037(5) 0.039(6) -0.006(4) 0.017(5) 0.005(4) 
C17 0.048(7) 0.035(5) 0.046(6) -0.015(4) 0.017(5) -0.011(4) 
C18 0.043(7) 0.024(5) 0.041(5) 0.008(4) 0.006(5) -0.002(4) 
C19 0.057(8) 0.040(5) 0.057(7) 0.008(5) 0.012(6) 0.012(5) 
C20 0.031(6) 0.028(4) 0.022(5) -0.001(3) 0.009(4) -0.003(4) 
C21 0.032(6) 0.025(5) 0.037(5) -0.001(4) 0.010(4) -0.003(4) 
C22 0.037(6) 0.042(5) 0.025(5) 0.010(4) 0.010(4) 0.009(4) 
C23 0.045(7) 0.039(5) 0.037(6) 0.007(4) 0.017(5) 0.016(5) 
C24 0.041(6) 0.026(5) 0.033(5) -0.002(4) 0.010(4) 0.009(4) 
C25 0.033(6) 0.024(4) 0.021(4) 0.006(3) 0.008(4) 0.002(4) 
C26 0.044(7) 0.020(4) 0.027(5) 0.000(4) 0.009(4) -0.002(4) 
C27 0.034(6) 0.018(4) 0.030(5) 0.000(3) 0.004(4) 0.001(4) 
C28 0.038(6) 0.019(4) 0.036(5) -0.007(4) 0.012(4) 0.002(4) 
C29 0.037(6) 0.020(4) 0.040(5) -0.002(4) 0.010(5) -0.002(4) 
C30 0.046(6) 0.018(4) 0.038(6) 0.002(4) 0.015(5) -0.001(4) 
C31 0.051(7) 0.027(5) 0.044(6) -0.001(4) 0.018(5) -0.003(4) 
C32 0.054(7) 0.032(5) 0.030(5) 0.008(4) 0.016(5) 0.001(5) 
  
_geom_special_details 
; 
 All esds (except the esd in the dihedral angle between two l.s. planes) 
 are estimated using the full covariance matrix.  The cell esds are taken 
 into account individually in the estimation of esds in distances, angles 
 and torsion angles; correlations between esds in cell parameters are only 
 used when they are defined by crystal symmetry.  An approximate (isotropic) 
 treatment of cell esds is used for estimating esds involving l.s. planes. 
; 
  
loop_ 
 _geom_bond_atom_site_label_1 
 _geom_bond_atom_site_label_2 
 _geom_bond_distance 
 _geom_bond_site_symmetry_2 
 _geom_bond_publ_flag 
O1 C1 1.362(8) . ? 
O1 C13 1.364(8) . ? 
O2 C26 1.234(9) . ? 
N1 C3 1.363(9) . ? 
N1 C16 1.449(10) . ? 
N2 C11 1.365(10) . ? 
N2 C18 1.463(9) . ? 
N3 C26 1.352(9) . ? 
N3 C27 1.458(9) . ? 
N3 C7 1.494(9) . ? 
N4 C30 1.350(9) . ? 
N4 C32 1.365(9) . ? 
N4 C29 1.465(9) . ? 
N5 C30 1.317(9) . ? 
N5 C31 1.385(10) . ? 
C1 C2 1.373(10) . ? 
C1 C6 1.388(9) . ? 
C2 C3 1.388(10) . ? 
C3 C4 1.414(10) . ? 
C4 C5 1.365(10) . ? 
C4 C14 1.511(10) . ? 
C5 C6 1.398(10) . ? 
C6 C7 1.505(10) . ? 
C7 C8 1.507(9) . ? 
C7 C20 1.525(10) . ? 
C8 C13 1.391(9) . ? 
C8 C9 1.401(10) . ? 
C9 C10 1.394(10) . ? 
C10 C11 1.427(10) . ? 
C10 C15 1.499(10) . ? 
C11 C12 1.380(10) . ? 
C12 C13 1.392(10) . ? 
C16 C17 1.494(11) . ? 
C18 C19 1.526(12) . ? 
C20 C21 1.386(10) . ? 
C20 C25 1.390(10) . ? 
C21 C22 1.399(11) . ? 
C22 C23 1.387(11) . ? 
C23 C24 1.375(11) . ? 
C24 C25 1.397(10) . ? 
C25 C26 1.494(11) . ? 
C27 C28 1.510(10) . ? 
C28 C29 1.525(10) . ? 
C31 C32 1.369(11) . ? 
  
loop_ 
 _geom_angle_atom_site_label_1 
 _geom_angle_atom_site_label_2 
 _geom_angle_atom_site_label_3 
 _geom_angle 
 _geom_angle_site_symmetry_1 
 _geom_angle_site_symmetry_3 
 _geom_angle_publ_flag 
C1 O1 C13 118.7(6) . . ? 
C3 N1 C16 123.8(7) . . ? 
C11 N2 C18 123.2(7) . . ? 
C26 N3 C27 123.4(6) . . ? 
C26 N3 C7 114.5(7) . . ? 
C27 N3 C7 121.4(6) . . ? 
C30 N4 C32 107.2(6) . . ? 
C30 N4 C29 126.0(6) . . ? 
C32 N4 C29 126.7(7) . . ? 
C30 N5 C31 104.3(7) . . ? 
O1 C1 C2 115.3(7) . . ? 
O1 C1 C6 123.2(7) . . ? 
C2 C1 C6 121.5(7) . . ? 
C1 C2 C3 121.3(7) . . ? 
N1 C3 C2 120.9(7) . . ? 
N1 C3 C4 120.7(7) . . ? 
C2 C3 C4 118.3(7) . . ? 
C5 C4 C3 118.5(7) . . ? 
C5 C4 C14 120.8(7) . . ? 
C3 C4 C14 120.7(7) . . ? 
C4 C5 C6 123.8(7) . . ? 
C1 C6 C5 116.4(7) . . ? 
C1 C6 C7 122.3(7) . . ? 
C5 C6 C7 121.3(6) . . ? 
N3 C7 C6 110.7(6) . . ? 
N3 C7 C8 111.8(6) . . ? 
C6 C7 C8 110.3(6) . . ? 
N3 C7 C20 100.0(5) . . ? 
C6 C7 C20 110.4(6) . . ? 
C8 C7 C20 113.2(6) . . ? 
C13 C8 C9 116.3(6) . . ? 
C13 C8 C7 122.0(6) . . ? 
C9 C8 C7 121.7(6) . . ? 
C10 C9 C8 123.4(7) . . ? 
C9 C10 C11 118.5(7) . . ? 
C9 C10 C15 120.6(7) . . ? 
C11 C10 C15 120.9(7) . . ? 
N2 C11 C12 122.0(7) . . ? 
N2 C11 C10 119.6(7) . . ? 
C12 C11 C10 118.3(7) . . ? 
C11 C12 C13 121.5(7) . . ? 
O1 C13 C8 123.2(6) . . ? 
O1 C13 C12 114.9(6) . . ? 
C8 C13 C12 121.9(7) . . ? 
N1 C16 C17 112.0(7) . . ? 
N2 C18 C19 113.7(7) . . ? 
C21 C20 C25 120.3(7) . . ? 
C21 C20 C7 128.9(7) . . ? 
C25 C20 C7 110.7(7) . . ? 
C20 C21 C22 117.8(7) . . ? 
C23 C22 C21 121.5(8) . . ? 
C24 C23 C22 120.7(8) . . ? 
C23 C24 C25 118.0(8) . . ? 
C20 C25 C24 121.6(8) . . ? 
C20 C25 C26 108.2(7) . . ? 
C24 C25 C26 130.2(7) . . ? 
O2 C26 N3 125.3(8) . . ? 
O2 C26 C25 128.2(7) . . ? 
N3 C26 C25 106.5(7) . . ? 
N3 C27 C28 114.7(7) . . ? 
C27 C28 C29 112.2(7) . . ? 
N4 C29 C28 110.4(6) . . ? 
N5 C30 N4 112.5(7) . . ? 
C32 C31 N5 110.3(7) . . ? 
N4 C32 C31 105.7(7) . . ? 
  
_refine_diff_density_max    0.477 
_refine_diff_density_min   -0.378 
_refine_diff_density_rms    0.081 
  
_shelx_res_file 
; 
TITL ic21148 in P2(1)/c 
    ic21148.res 
    created by SHELXL-2018/3 at 16:15:05 on 15-Oct-2021 
CELL 0.71073  17.9166   9.1955  17.8272  90.000 110.198  90.000 
ZERR    4.00   0.0113   0.0026   0.0084   0.000   0.065   0.000 
LATT  1 
SYMM -X, 0.5+Y, 0.5-Z 
SFAC C H N O 
UNIT 128 140 20 8 
TEMP -173 
OMIT -3 55 
ACTA 
  
L.S. 4 
BOND 
FMAP 2 
PLAN 20 
  
WGHT    0.100000 
FVAR       0.16978 
O1    4    0.221959    0.320017    0.300573    11.00000    0.05044    0.02031 = 
         0.02152    0.00073    0.00935    0.00371 
O2    4    0.306368    0.989201    0.335618    11.00000    0.04891    0.02315 = 
         0.05306   -0.00249    0.02450   -0.00807 
N1    3    0.110642    0.352664    0.020533    11.00000    0.04296    0.02314 = 
         0.02645   -0.00045    0.00403    0.00381 
H1    2    0.090547    0.406353   -0.020906    11.00000   -1.50000 
N2    3    0.318659    0.224547    0.577835    11.00000    0.04783    0.02807 = 
         0.03328    0.00590    0.01326    0.00556 
H2    2    0.325801    0.263191    0.621632    11.00000   -1.50000 
N3    3    0.283327    0.742984    0.329796    11.00000    0.03012    0.01530 = 
         0.04369    0.00093    0.01421   -0.00745 
N4    3    0.471683    0.450403    0.346154    11.00000    0.03928    0.02917 = 
         0.02262   -0.00137    0.01195   -0.00393 
N5    3    0.439866    0.288531    0.247892    11.00000    0.05676    0.03436 = 
         0.03472   -0.00549    0.01918   -0.00381 
C1    1    0.195700    0.410348    0.236178    11.00000    0.02891    0.02734 = 
         0.02908    0.00279    0.01377   -0.00176 
C2    1    0.169878    0.342439    0.163097    11.00000    0.03189    0.01846 = 
         0.03376   -0.00136    0.00733    0.00015 
AFIX  43 
H2A   2    0.172936    0.239498    0.160692    11.00000   -1.20000 
AFIX   0 
C3    1    0.139386    0.421273    0.092643    11.00000    0.03502    0.02021 = 
         0.03291   -0.00520    0.01295   -0.00336 
C4    1    0.141010    0.574785    0.097272    11.00000    0.04110    0.02448 = 
         0.02205    0.00268    0.01372    0.00092 
C5    1    0.166863    0.638400    0.170986    11.00000    0.03113    0.01782 = 
         0.03419   -0.00159    0.01400   -0.00099 
AFIX  43 
H5A   2    0.166702    0.741571    0.173702    11.00000   -1.20000 
AFIX   0 
C6    1    0.193557    0.560545    0.242696    11.00000    0.02973    0.01401 = 
         0.03654   -0.00519    0.01370   -0.00234 
C7    1    0.218023    0.636715    0.322239    11.00000    0.03619    0.01214 = 
         0.02417    0.00270    0.00718    0.00900 
C8    1    0.241390    0.527241    0.389303    11.00000    0.02651    0.01813 = 
         0.02332   -0.00203    0.00724    0.00049 
C9    1    0.263681    0.569904    0.469498    11.00000    0.03228    0.02135 = 
         0.02657   -0.00311    0.01443    0.00160 
AFIX  43 
H9A   2    0.260888    0.670227    0.480976    11.00000   -1.20000 
AFIX   0 
C10   1    0.289745    0.472784    0.533320    11.00000    0.03456    0.02458 = 
         0.02514   -0.00230    0.01158    0.00102 
C11   1    0.294855    0.322182    0.516462    11.00000    0.03159    0.02339 = 
         0.02308   -0.00308    0.01080    0.00283 
C12   1    0.272192    0.279313    0.437579    11.00000    0.03709    0.02039 = 
         0.04310   -0.00068    0.01678   -0.00180 
AFIX  43 
H12A  2    0.275292    0.179373    0.425472    11.00000   -1.20000 
AFIX   0 
C13   1    0.244888    0.379065    0.375310    11.00000    0.02598    0.02477 = 
         0.02308    0.00016    0.00614   -0.00450 
C14   1    0.113027    0.666319    0.022304    11.00000    0.04502    0.02652 = 
         0.02997    0.00251    0.01189    0.00520 
AFIX  33 
H14A  2    0.096797    0.602688   -0.024684    11.00000   -1.50000 
H14B  2    0.067715    0.725985    0.022333    11.00000   -1.50000 
H14C  2    0.156422    0.729650    0.020642    11.00000   -1.50000 
AFIX   0 
C15   1    0.309731    0.525252    0.617584    11.00000    0.05150    0.03244 = 
         0.03460   -0.00115    0.01445   -0.00326 
AFIX  33 
H15A  2    0.326873    0.442815    0.654393    11.00000   -1.50000 
H15B  2    0.352727    0.596976    0.629591    11.00000   -1.50000 
H15C  2    0.262660    0.570271    0.623867    11.00000   -1.50000 
AFIX   0 
C16   1    0.095736    0.197645    0.011407    11.00000    0.04542    0.03667 = 
         0.03929   -0.00581    0.01738    0.00460 
AFIX  23 
H16A  2    0.062911    0.168009    0.043510    11.00000   -1.20000 
H16B  2    0.146953    0.144868    0.032197    11.00000   -1.20000 
AFIX   0 
C17   1    0.053991    0.156046   -0.073862    11.00000    0.04848    0.03488 = 
         0.04567   -0.01478    0.01733   -0.01092 
AFIX  33 
H17A  2    0.045035    0.050743   -0.077497    11.00000   -1.50000 
H17B  2    0.002771    0.206618   -0.094361    11.00000   -1.50000 
H17C  2    0.086782    0.183485   -0.105670    11.00000   -1.50000 
AFIX   0 
C18   1    0.325301    0.068411    0.565797    11.00000    0.04320    0.02369 = 
         0.04135    0.00821    0.00633   -0.00203 
AFIX  23 
H18A  2    0.277796    0.036034    0.521076    11.00000   -1.20000 
H18B  2    0.325616    0.016310    0.614503    11.00000   -1.20000 
AFIX   0 
C19   1    0.399631    0.026113    0.547543    11.00000    0.05706    0.03976 = 
         0.05735    0.00807    0.01239    0.01153 
AFIX  33 
H19A  2    0.400335   -0.079430    0.540189    11.00000   -1.50000 
H19B  2    0.399204    0.075179    0.498597    11.00000   -1.50000 
H19C  2    0.447076    0.055434    0.592124    11.00000   -1.50000 
AFIX   0 
C20   1    0.152838    0.740529    0.325470    11.00000    0.03067    0.02784 = 
         0.02162   -0.00118    0.00867   -0.00301 
C21   1    0.075847    0.709121    0.321270    11.00000    0.03163    0.02541 = 
         0.03719   -0.00068    0.01047   -0.00336 
AFIX  43 
H21A  2    0.058066    0.611475    0.319754    11.00000   -1.20000 
AFIX   0 
C22   1    0.025153    0.825899    0.319334    11.00000    0.03683    0.04197 = 
         0.02542    0.00992    0.00976    0.00871 
AFIX  43 
H22A  2   -0.028050    0.806843    0.315870    11.00000   -1.20000 
AFIX   0 
C23   1    0.050752    0.968815    0.322354    11.00000    0.04480    0.03885 = 
         0.03716    0.00683    0.01652    0.01573 
AFIX  43 
H23A  2    0.015200    1.045860    0.321679    11.00000   -1.20000 
AFIX   0 
C24   1    0.127081    1.000150    0.326317    11.00000    0.04089    0.02648 = 
         0.03308   -0.00227    0.01026    0.00866 
AFIX  43 
H24A  2    0.144505    1.097901    0.327129    11.00000   -1.20000 
AFIX   0 
C25   1    0.178224    0.884031    0.329110    11.00000    0.03323    0.02444 = 
         0.02129    0.00561    0.00811    0.00165 
C26   1    0.262555    0.883895    0.331919    11.00000    0.04357    0.02002 = 
         0.02695    0.00018    0.00892   -0.00220 
C27   1    0.358169    0.697308    0.321908    11.00000    0.03376    0.01845 = 
         0.03014   -0.00036    0.00415    0.00053 
AFIX  23 
H27A  2    0.377126    0.775698    0.294881    11.00000   -1.20000 
H27B  2    0.348100    0.610352    0.287078    11.00000   -1.20000 
AFIX   0 
C28   1    0.423326    0.661916    0.399871    11.00000    0.03825    0.01906 = 
         0.03586   -0.00680    0.01221    0.00185 
AFIX  23 
H28A  2    0.402007    0.595955    0.431486    11.00000   -1.20000 
H28B  2    0.440821    0.752564    0.430949    11.00000   -1.20000 
AFIX   0 
C29   1    0.494704    0.590136    0.387064    11.00000    0.03718    0.01970 = 
         0.03982   -0.00160    0.01019   -0.00224 
AFIX  23 
H29A  2    0.515741    0.654840    0.354661    11.00000   -1.20000 
H29B  2    0.537292    0.574604    0.439340    11.00000   -1.20000 
AFIX   0 
C30   1    0.468397    0.419419    0.271064    11.00000    0.04627    0.01764 = 
         0.03823    0.00197    0.01536   -0.00130 
AFIX  43 
H30A  2    0.484843    0.484787    0.238532    11.00000   -1.20000 
AFIX   0 
C31   1    0.423287    0.233016    0.312659    11.00000    0.05063    0.02748 = 
         0.04427   -0.00062    0.01836   -0.00272 
AFIX  43 
H31A  2    0.400628    0.140139    0.314174    11.00000   -1.20000 
AFIX   0 
C32   1    0.444237    0.331187    0.374172    11.00000    0.05416    0.03243 = 
         0.03050    0.00780    0.01639    0.00084 
AFIX  43 
H32A  2    0.440458    0.318888    0.425650    11.00000   -1.20000 
  
AFIX   0 
HKLF 4 
  
  
  
  
REM  ic21148 in P2(1)/c 
REM wR2 = 0.3735, GooF = S = 0.980, Restrained GooF = 0.980 for all data 
REM R1 = 0.1160 for 1636 Fo > 4sig(Fo) and 0.3782 for all 6253 data 
REM 358 parameters refined using 0 restraints 
  
END 
  
WGHT      0.0706      0.0000 
  
REM Highest difference peak  0.477,  deepest hole -0.378,  1-sigma level  0.081 
Q1    1   0.3870  0.5041  0.6646  11.00000  0.05    0.48 
Q2    1   0.1588  0.6417 -0.0155  11.00000  0.05    0.44 
Q3    1   0.1229  0.7693  0.0343  11.00000  0.05    0.42 
Q4    1   0.2936  0.6235  0.6176  11.00000  0.05    0.42 
Q5    1   0.2642  0.4443  0.6429  11.00000  0.05    0.37 
Q6    1   0.0406  1.1267  0.3078  11.00000  0.05    0.32 
Q7    1   0.1605  0.6915  0.2480  11.00000  0.05    0.31 
Q8    1   0.1501  0.6342  0.0190  11.00000  0.05    0.30 
Q9    1  -0.0977  0.9035  0.2623  11.00000  0.05    0.29 
Q10   1   0.3004 -0.0694  0.6822  11.00000  0.05    0.29 
Q11   1   0.0182  0.5894  0.3423  11.00000  0.05    0.29 
Q12   1   0.4181  0.0928  0.3087  11.00000  0.05    0.29 
Q13   1   0.3714  0.2946  0.6501  11.00000  0.05    0.29 
Q14   1   0.4271  0.0352  0.6561  11.00000  0.05    0.29 
Q15   1   0.3626  0.7654  0.2493  11.00000  0.05    0.28 
Q16   1   0.0821  0.7594  0.2472  11.00000  0.05    0.27 
Q17   1   0.0783  0.7339  0.4031  11.00000  0.05    0.27 
Q18   1   0.2166  0.5053  0.4040  11.00000  0.05    0.27 
Q19   1   0.1107  0.5279  0.2147  11.00000  0.05    0.26 
Q20   1   0.3057  0.2963  0.3488  11.00000  0.05    0.26 
; 
_shelx_res_checksum    2824 
  
_shelx_hkl_file 
; 
   0   0   4  143.32    9.82 
   0   0   5    1.55    1.83 
   0   0   6  433.69   20.48 
   0   0   7    2.26    1.88 
   0   0   8   98.29   11.87 
   0   0   9    2.88    1.86 
   0   0  10    2.75    3.46 
   0   0  11   -1.03    1.74 
   0   0  12  201.16   20.41 
   0   0  13    0.74    2.39 
   0   0  14  207.89   23.10 
   0   0  15   -2.07    2.99 
   0   0  16    5.91    4.71 
   0   0  17    1.86    4.29 
   0   0  18   -3.53    4.52 
   0   0  19   -6.98    7.51 
   0   0  20   29.63   11.64 
   0   0  21    3.60    4.56 
   0  -1  -3   27.54    3.07 
   0   1   3   21.93    2.56 
   0   1  -3   22.82    4.19 
   0  -1  -4   77.63    6.04 
   0   1   4   78.98    6.03 
   0   1  -4   69.71    8.22 
   0   1  -5  135.52   11.89 
   0   1   5  130.44    9.27 
   0  -1  -5  134.89    9.03 
   0  -1   6   26.78    5.99 
   0   1  -6   31.52    6.61 
   0   1   6   28.78    4.92 
   0  -1  -6   29.02    4.90 
   0   1  -7    8.87    3.59 
   0   1   7   11.86    3.83 
   0  -1   7    5.93    3.06 
   0   1   8  114.11   11.52 
   0  -1   8  106.74   12.69 
   0   1   9  128.79   13.01 
   0  -1   9  139.69   15.51 
   0  -1  10   74.13   12.22 
   0   1  10   58.19    9.68 
   0  -1  11   45.08   10.86 
   0  -1  11   46.82   10.20 
   0   1  11   43.28    8.77 
   0  -1  12   33.29    8.74 
   0   1  12   33.83    8.16 
   0  -1  13   21.32    7.35 
   0   1  13   28.90    8.14 
   0   1  14   86.26   13.84 
   0  -1  14   74.19   14.36 
   0   1  15   23.24    8.31 
   0  -1  15   21.52    9.19 
   0  -1  16   19.03    7.65 
   0   1  16   23.74    8.25 
   0   1  17    6.32    4.05 
   0  -1  17    3.35    5.17 
   0  -1  18   13.32    7.67 
   0   1  18    6.83    6.17 
   0  -1  19    5.63    4.37 
   0   1  19    2.12    4.79 
   0  -1  20   -1.99    5.52 
   0   1  20   -4.10    8.46 
   0  -1  21   -8.03    5.39 
   0  -1  22  -18.01   12.95 
   0  -1  23    8.32    7.90 
   0   2  -1  185.91    8.95 
   0  -2   2   11.01    2.46 
   0   2  -2   10.99    2.70 
   0   2  -3    1.35    1.93 
   0  -2   3   -0.14    1.20 
   0  -2  -3   -0.03    0.93 
   0   2  -4   42.01    6.62 
   0  -2  -4   46.75    4.56 
   0  -2   4   41.37    6.56 
   0   2   4   41.51    3.90 
   0  -2  -5   -2.23    2.01 
   0   2  -5   -1.46    2.84 
   0  -2   5    4.85    3.26 
   0   2   5    5.44    2.21 
   0  -2   6   46.27    8.07 
   0  -2  -6   48.97    5.58 
   0   2   6   44.53    5.42 
   0   2  -6   41.21    7.07 
   0  -2  -7    8.23    2.80 
   0   2  -7    6.32    3.07 
   0  -2   7   10.45    4.14 
   0   2   7    8.34    2.93 
   0  -2  -8   74.81    8.34 
   0  -2   8   76.06   11.67 
   0   2  -8   66.71   11.25 
   0   2   8   75.40    8.59 
   0  -2   8   72.90   11.68 
   0   2   9    3.23    2.11 
   0  -2   9   -1.22    2.30 
   0   2  -9   -1.53    3.32 
   0  -2   9   -2.78    2.98 
   0  -2  10   29.06    8.08 
   0   2  10   27.08    6.27 
   0  -2  10   21.23    7.19 
   0   2  10   31.75    8.67 
   0  -2  11   37.56   10.10 
   0   2  11   36.64    7.64 
   0  -2  11   50.06   11.11 
   0   2  11   56.10   11.88 
   0   2  12   16.37    4.90 
   0  -2  12   15.76    7.55 
   0  -2  13   19.96    8.04 
   0   2  13   23.36    6.70 
   0   2  14    1.84    3.17 
   0  -2  14    2.53    3.43 
   0   2  15   -1.24    1.56 
   0  -2  15    2.58    5.03 
   0   2  16   16.16    6.27 
   0  -2  16   13.15    6.24 
   0   2  17    1.34    3.81 
   0  -2  17   -0.22    4.41 
   0  -2  18    1.10    3.17 
   0   2  18    4.68    7.42 
   0  -2  19    1.59    5.46 
   0   2  19    8.33    6.73 
   0  -2  20    2.07    4.17 
   0  -2  21   11.84    4.38 
   0  -2  22    2.55    6.41 
   0  -2  23  -10.39    8.91 
   0   3  -1   51.99    5.42 
   0   3  -2    1.89    2.26 
   0  -3  -3   55.59    5.22 
   0   3  -3   45.63    6.33 
   0  -3   3   47.04    6.41 
   0   3  -4   64.84    8.13 
   0  -3   4   65.12    7.99 
   0  -3  -4   72.62    5.71 
   0   3  -5   -0.31    1.85 
   0  -3   5    0.27    2.23 
   0  -3  -5   -0.60    0.81 
   0  -3   6   32.38    6.73 
   0  -3  -6   34.93    4.47 
   0   3   6   38.33    4.50 
   0   3  -6   28.86    6.71 
   0   3   7   25.35    4.11 
   0   3  -7   28.23    7.08 
   0  -3  -7   24.84    4.14 
   0  -3   7   28.91    7.09 
   0  -3  -8    0.41    1.24 
   0  -3   8    3.00    2.15 
   0   3   8    1.74    1.27 
   0   3  -8    2.34    2.04 
   0  -3  -9    0.89    1.02 
   0  -3   9    2.46    3.88 
   0  -3   9    1.70    3.21 
   0   3   9    0.62    1.40 
   0   3  -9   -2.22    3.66 
   0  -3  10    3.67    4.22 
   0   3 -10   -2.40    3.73 
   0  -3  10    3.85    4.85 
   0   3  10    0.29    2.39 
   0   3  10   -1.62    2.74 
   0   3  11    7.44    3.20 
   0   3  11    5.49    3.24 
   0  -3  11    7.50    4.76 
   0   3 -11   13.81    6.70 
   0   3  12    1.63    2.28 
   0  -3  12   -3.26    1.97 
   0  -3  13    2.24    2.35 
   0   3  13    1.31    1.57 
   0   3  14    2.49    3.58 
   0  -3  14    4.04    3.47 
   0   3  15    5.12    3.76 
   0  -3  15    9.34    6.97 
   0  -3  16    3.78    6.78 
   0   3  16   -0.76    2.04 
   0   3  17   -1.99    2.33 
   0  -3  17    0.60    3.52 
   0  -3  18   -1.57    3.86 
   0  -3  19    2.37    4.58 
   0  -3  20   -5.08    9.21 
   0  -3  21   15.41   11.67 
   0  -3  22    1.74    6.54 
   0   4  -1    0.13    1.37 
   0   4  -2   10.37    3.00 
   0   4  -3   -0.22    2.63 
   0  -4  -4    1.23    1.49 
   0  -4   4    5.32    2.44 
   0   4  -4   -0.27    1.61 
   0   4  -5   36.56    7.09 
   0  -4   5   37.73    7.07 
   0  -4  -5   36.36    4.62 
   0  -4   6    4.03    3.42 
   0  -4  -6    0.99    1.42 
   0   4  -6   -1.32    2.28 
   0  -4   7   38.00    8.30 
   0  -4  -7   37.23    4.87 
   0   4  -7   30.19    7.03 
   0  -4  -8   25.63    4.18 
   0   4  -8   31.87    7.61 
   0  -4   8   40.57    8.28 
   0  -4   9    3.57    3.70 
   0  -4   9    3.60    3.81 
   0  -4  -9    0.56    1.34 
   0   4   9    0.94    1.04 
   0   4  -9    3.65    3.44 
   0   4  10    8.89    2.94 
   0  -4 -10    7.27    3.08 
   0  -4  10    7.79    2.58 
   0  -4  10   11.04    5.95 
   0   4 -10   12.05    5.87 
   0  -4  11    4.96    3.94 
   0   4 -11    5.72    4.89 
   0   4  11    5.78    1.44 
   0   4 -12    0.39    1.93 
   0   4  12    1.22    1.32 
   0   4  13    7.77    3.52 
   0  -4  13    9.37    5.88 
   0   4  14    1.46    2.87 
   0  -4  14    7.90    6.74 
   0  -4  15   14.31    8.88 
   0   4  15    1.25    1.97 
   0  -4  16   13.72    8.69 
   0   4  16    1.27    1.50 
   0  -4  17  -10.08    7.09 
   0  -4  18    5.97    3.30 
   0  -4  19   38.52   17.30 
   0  -4  20    4.71   10.55 
   0  -4  21    6.27   11.15 
   0   5  -1   38.71    6.30 
   0   5  -2   24.81    5.28 
   0   5  -3    1.42    1.38 
   0   5  -4   19.02    5.39 
   0  -5  -4   21.81    4.47 
   0  -5  -5   -0.87    1.73 
   0  -5   5   -0.06    2.58 
   0   5  -5   -1.66    2.66 
   0  -5   6    0.77    2.26 
   0  -5  -6    0.79    0.99 
   0   5  -6    3.65    2.71 
   0  -5   7    0.91    2.17 
   0   5  -7    0.48    2.49 
   0  -5  -7   -0.03    1.71 
   0  -5   8   -2.28    2.65 
   0  -5  -8   -0.55    1.08 
   0   5  -8   -0.71    3.34 
   0  -5  -9    2.97    1.30 
   0   5  -9   -1.09    3.09 
   0  -5   9   -0.33    4.64 
   0  -5   9    0.32    1.88 
   0   5 -10    5.84    4.13 
   0  -5  10    0.60    2.94 
   0  -5 -10    2.66    1.71 
   0  -5  10   -1.66    5.20 
   0  -5  11   19.09    8.33 
   0   5 -11   12.57    5.80 
   0  -5  12    2.82    2.20 
   0   5 -12    2.44    2.40 
   0  -5  13   -0.82    2.79 
   0  -5  14   11.09    7.10 
   0  -5  15   -3.85    4.01 
   0  -5  16    1.85    3.66 
   0  -5  17    6.64    9.07 
   0  -5  18   -4.04    8.26 
   0  -5  19  -11.89   10.35 
   0  -5  20   20.49   12.18 
   0   6   0    8.54    3.26 
   0   6  -1    1.90    1.34 
   0   6  -2   13.26    4.00 
   0   6  -3    2.83    2.31 
   0  -6  -4    3.91    2.39 
   0   6  -4    0.38    1.41 
   0  -6  -5    0.26    1.74 
   0   6  -5    0.30    1.62 
   0   6  -6   82.52   12.14 
   0  -6  -6   89.30    8.92 
   0   6  -7   10.17    5.42 
   0  -6   7    4.18    2.30 
   0  -6  -7    4.29    1.72 
   0   6  -8    3.73    3.65 
   0  -6   8   -4.00    3.32 
   0  -6  -8    0.78    0.96 
   0  -6  -9    9.05    2.59 
   0  -6   9    9.61    4.24 
   0   6  -9   12.42    5.20 
   0  -6   9   15.65    8.47 
   0  -6 -10    1.87    0.96 
   0  -6  10    6.21    5.17 
   0   6 -10    7.40    4.63 
   0  -6  11   21.08    9.30 
   0   6 -11   12.97    5.63 
   0  -6  12    1.86    3.32 
   0   6 -12   -7.44    6.51 
   0   6 -13   16.34    7.78 
   0  -6  13   10.09    4.86 
   0  -6  14    2.96    3.79 
   0  -6  15    0.23    6.54 
   0  -6  16    1.48    5.05 
   0  -6  17   11.56   10.30 
   0  -6  18   17.45   14.43 
   0  -6  19    8.60   12.68 
   0   7   0    1.30    2.38 
   0   7  -1    8.15    3.18 
   0   7  -2    6.17    3.60 
   0   7  -3    5.79    3.10 
   0  -7  -4   10.47    4.55 
   0   7  -4    7.88    3.48 
   0  -7  -5  106.94   11.42 
   0   7  -5  100.25   13.30 
   0   7  -6    3.26    3.47 
   0  -7  -6    3.80    2.64 
   0   7  -7   45.67   10.37 
   0  -7  -7   40.64    6.28 
   0   7  -8   -0.32    2.51 
   0  -7  -8    3.47    2.41 
   0  -7   9   36.19   12.16 
   0   7  -9   31.56    8.67 
   0  -7  -9   32.92    4.51 
   0  -7  10   -3.96    6.05 
   0   7 -10    1.74    2.15 
   0   7 -11   -4.45    2.96 
   0  -7  11    8.99    4.23 
   0  -7  12    1.49    3.36 
   0   7 -12    2.82    2.42 
   0  -7  13    8.82    7.04 
   0   7 -13   -4.56    4.97 
   0  -7  14   -2.23    4.36 
   0  -7  15    9.76    3.83 
   0  -7  16    0.81    2.88 
   0  -7  17   -4.11    7.60 
   0   8   0   -3.27    3.36 
   0   8   1    3.15    2.54 
   0   8  -1    1.16    2.17 
   0   8  -2    4.96    2.62 
   0   8  -3    1.97    2.75 
   0   8  -4   20.57    6.33 
   0  -8  -4   27.59    7.45 
   0   8  -5   44.38    9.33 
   0  -8  -5   46.77    8.83 
   0   8  -6   28.60    8.12 
   0  -8  -6   33.68    6.94 
   0  -8  -7   20.63    4.05 
   0   8  -7   19.91    6.94 
   0  -8   8    7.49    5.29 
   0   8  -8    9.95    5.51 
   0  -8   9   -3.34    4.52 
   0   8  -9    2.42    2.23 
   0  -8  10   -2.09    3.44 
   0   8 -10    8.40    5.64 
   0  -8  11    5.73    6.59 
   0   8 -11    7.58    6.93 
   0   8 -12    4.78    5.42 
   0  -8  12   -0.56    4.01 
   0  -8  13   -0.80    5.66 
   0  -8  14    5.85    4.62 
   0  -8  15    2.21    7.54 
   0  -8  16    4.71    4.83 
   0   9   0   -1.27    2.92 
   0   9  -1    0.07    1.94 
   0   9   1   -0.64    3.02 
   0   9   2    3.25    2.10 
   0   9  -2   -1.33    3.33 
   0   9  -3    7.68    3.66 
   0   9  -4    6.68    5.02 
   0   9  -5   -2.67    4.58 
   0   9  -6    0.64    3.25 
   0  -9   6   10.78    7.26 
   0   9  -7   -1.84    3.37 
   0  -9   7   -8.47    7.20 
   0   9  -8   -0.47    4.50 
   0  -9   8   -4.70    6.03 
   0  -9   9  -14.28    9.17 
   0   9  -9    0.22    2.11 
   0   9 -10    3.36    2.52 
   0  -9  10    7.75    6.98 
   0   9 -11   -2.22    3.94 
   0  -9  11   13.15   10.96 
   0   9 -12   -2.11    4.87 
   0  -9  12  -12.25   10.51 
   0  -9  13   -0.66    7.21 
   0  -9  14    3.31    3.77 
   0  10   0    6.25    3.88 
   0  10   1    1.24    1.93 
   0  10  -1    5.05    3.72 
   0  10  -2    4.97    2.85 
   0  10  -3    6.66    3.05 
   0 -10   4   -3.28    4.15 
   0  10  -4   -1.58    4.34 
   0 -10   5    6.94    6.31 
   0  10  -5   -1.52    3.49 
   0 -10   6    5.43    4.39 
   0 -10   7    5.87    5.54 
   0 -10   8   -5.53    3.61 
   0 -10   9   38.72   14.05 
   0 -10  10  -13.29   10.41 
   0 -10  11    0.40    4.92 
   0 -10  12   -4.88    6.16 
   0 -11   0    0.94    2.70 
   0 -11  -1   -3.46    2.82 
   0 -11   1   -0.45    5.62 
   0 -11   2   15.22    7.15 
   0 -11  -2    3.29    4.24 
   0 -11   3    0.62    4.58 
   0 -11   4    3.44    4.40 
   0 -11   5    9.83    7.67 
   0 -11   6   12.56    9.59 
   0 -11   7    5.39    8.03 
   0 -11   8   -2.43    4.15 
   0 -11   9   -4.27    6.96 
   0 -11  10   -1.92    5.43 
   0 -12   1   14.43    5.29 
   0 -12   2   -2.21    9.76 
   0 -12   3   38.27   12.22 
   0 -12   4    0.44    3.36 
   0 -12   5    6.87    8.29 
   0 -12   6   12.16   11.55 
   0 -12   7   18.17   12.58 
  -1   0  22  -17.01   10.68 
  -1   0  21   -2.11    4.39 
  -1   0  19    4.62    7.15 
  -1   0  18    2.43    4.42 
  -1   0  17   -5.12    2.02 
  -1   0  16   22.98    8.54 
  -1   0  15    1.92    3.47 
  -1   0  14    6.00    4.14 
  -1   0  13   -0.29    1.95 
  -1   0  12    1.03    1.74 
  -1   0  11    3.58    2.08 
  -1   0  10  389.29   24.43 
  -1   0   9   -1.95    2.30 
  -1   0   8  194.55   15.19 
  -1   0   7    2.86    3.16 
   1   0  -7    1.26    2.04 
   1   0  -6  232.88   16.30 
  -1   0   6  217.91   13.49 
   1   0  -5    0.42    1.97 
   1   0  -4 1641.98   34.93 
   1   0  -3   -1.13    1.45 
  -1   0  -3   -0.50    1.36 
  -1   0  -4  645.62   22.68 
   1   0   4  646.31   23.04 
   1   0   5   -0.05    1.35 
  -1   0  -5    3.18    2.51 
  -1   0  -6  233.17   15.56 
   1   0   6  225.18   15.87 
   1   0   7   -1.26    2.51 
   1   0   8   10.81    4.44 
   1   0   9   -0.53    1.60 
   1   0  10   36.48    8.68 
   1   0  11    1.07    1.80 
   1   0  12   97.34   14.83 
   1   0  13   -2.55    3.71 
   1   0  14   68.04   13.88 
   1   0  15    3.61    4.56 
   1   0  16   27.63   10.57 
   1   0  17   -2.57    5.08 
   1   0  18    2.83    4.12 
   1   0  19   -2.58    4.41 
   1   0  20    3.62    3.26 
   1   0  21    7.38    9.10 
  -1  -1  23   -2.57    5.50 
  -1  -1  22    2.43    4.63 
  -1  -1  21    8.01    7.59 
  -1  -1  20   10.59    6.88 
  -1   1  20   -2.09    4.68 
  -1  -1  19   13.57    6.57 
  -1   1  19   -5.59    4.96 
  -1   1  18   23.36    9.03 
  -1  -1  18   32.08   10.83 
  -1  -1  17    0.03    2.53 
  -1   1  17    6.76    5.09 
  -1   1  16    5.72    1.85 
  -1  -1  16   14.36    7.86 
  -1  -1  15   29.96    9.49 
  -1   1  15   29.64    8.39 
  -1  -1  14   71.68   14.36 
  -1   1  14   60.60   11.28 
  -1  -1  13   -3.13    2.86 
  -1   1  13   -5.44    4.29 
  -1  -1  12   31.36    8.71 
  -1   1  12   39.29    8.22 
  -1   1  11   10.94    4.39 
  -1  -1  11   19.24    6.35 
  -1  -1  10    7.71    4.28 
   1   1 -10    7.76    4.46 
  -1   1  10    4.37    2.49 
   1   1  -9   -1.90    3.04 
  -1   1   9    5.37    3.18 
  -1  -1   9    1.99    1.71 
   1   1  -8    3.27    1.59 
  -1  -1   8    6.30    3.06 
  -1   1   8    6.27    2.80 
  -1   1   7   16.53    3.88 
   1   1  -7   14.89    4.62 
   1   1  -6  309.12   19.67 
  -1   1   6  297.13   13.90 
  -1   1   5  287.86   11.64 
   1   1  -5  296.08   17.12 
   1   1  -4  530.15   20.81 
  -1   1   4  518.32   12.64 
   1   1  -3   88.44    7.72 
  -1   1  -2  215.28   11.75 
   1   1   2  204.50    9.19 
   1   1   3  448.12   15.23 
  -1  -1  -3  428.68   15.43 
   1   1   4   55.63    6.13 
  -1  -1  -4   62.64    6.48 
  -1  -1  -5  103.65    9.30 
   1   1   5   91.72    8.86 
   1   1   6  112.16   10.47 
  -1  -1  -6  101.62   10.32 
   1  -1   6   93.26   11.31 
   1   1   7  199.59   15.26 
  -1  -1  -7  202.35   14.84 
   1  -1   7  195.37   17.26 
   1   1   8  105.48   12.13 
   1  -1   8  111.86   13.71 
  -1  -1  -8  111.97   11.58 
   1  -1   9    9.67    4.53 
   1   1   9   13.91    4.91 
  -1  -1  -9    9.49    4.13 
   1   1  10    0.54    2.43 
   1  -1  10   -1.27    1.77 
   1  -1  10   -2.54    3.27 
   1   1  11   -0.27    2.28 
   1   1  11    1.09    1.91 
   1  -1  11   -2.50    3.94 
   1  -1  11   -3.50    4.73 
   1  -1  12    2.26    3.32 
   1   1  12    4.45    4.47 
   1   1  13    2.87    3.04 
   1  -1  13    0.20    3.62 
   1   1  14   53.24   11.48 
   1  -1  14   56.00   13.19 
   1   1  15   20.70    8.45 
   1  -1  15   19.69    8.18 
   1  -1  16   -1.84    6.08 
   1   1  16   -0.12    3.16 
   1   1  17   -2.32    3.94 
   1  -1  17    9.95    8.59 
   1  -1  18   -5.94    7.50 
   1   1  18    9.33    6.65 
   1   1  19   -4.48    5.16 
   1  -1  19    5.92    4.75 
   1  -1  20   -6.62    8.27 
   1   1  20  -11.81    6.85 
   1  -1  21    1.03    3.97 
   1  -1  22    3.30    5.75 
  -1  -2  23  -21.10   14.85 
  -1  -2  22    2.24    4.24 
  -1  -2  21   14.78    5.91 
  -1  -2  20    3.19    6.71 
  -1  -2  19    1.98    4.44 
  -1   2  19   -1.22    2.26 
  -1  -2  18   -1.88    2.81 
  -1   2  18   -0.12    2.89 
  -1  -2  17  -12.15    8.35 
  -1   2  17    5.40    4.29 
  -1  -2  16    2.83    5.43 
  -1   2  16   -1.54    3.00 
  -1  -2  15   -2.39    3.72 
  -1   2  15    1.37    1.35 
  -1  -2  14   31.53    9.82 
  -1   2  14   31.85    7.51 
  -1  -2  13    1.52    2.80 
  -1   2  13    1.28    2.23 
  -1   2  12    1.36    1.72 
   1   2 -12    0.79    2.15 
  -1  -2  12    2.08    3.12 
  -1  -2  11    3.00    3.66 
   1   2 -11    9.57    4.97 
  -1  -2  11    6.87    5.52 
  -1   2  11    7.15    3.00 
  -1   2  11    2.67    1.63 
  -1   2  10    2.33    2.40 
  -1   2  10   -2.69    2.41 
  -1  -2  10   -0.32    2.91 
   1   2 -10    0.79    2.99 
  -1  -2  10   -2.52    2.40 
   1   2  -9   22.16    6.72 
  -1  -2   9   30.76    7.82 
  -1   2   9   25.46    5.22 
  -1   2   9   26.11    7.13 
  -1   2   8   22.35    4.68 
   1   2  -8   20.24    6.36 
  -1  -2   8   17.88    4.50 
  -1   2   8   14.58    5.37 
  -1   2   7   28.36    5.88 
   1   2  -7   33.28    7.54 
  -1   2   7   27.81    4.19 
  -1  -2   7   29.93    6.98 
   1   2  -6    6.39    3.12 
  -1   2   6    6.05    1.53 
  -1   2   6    2.36    1.82 
  -1  -2   6    3.83    2.35 
   1  -2  -5    9.00    1.84 
  -1  -2   5    7.69    3.64 
  -1   2   5    7.20    1.06 
   1   2  -5    6.96    2.61 
  -1  -2   4    5.26    2.53 
   1   2  -4    3.67    2.13 
   1   2  -3    1.27    2.01 
  -1  -2   3    7.30    3.00 
   1   2  -2    2.10    1.51 
   1  -2   1   -0.26    0.84 
  -1   2  -1    2.33    1.30 
   1  -2   2  239.07   11.18 
  -1  -2  -2  226.99   10.97 
  -1   2  -2  226.95   11.19 
   1   2   3   76.47    6.40 
  -1  -2  -3   78.84    6.42 
  -1   2  -3   62.25    7.18 
   1  -2   3   64.86    6.87 
   1   2   4    0.88    1.27 
  -1  -2  -4    0.61    1.08 
  -1   2  -4   -1.06    2.06 
   1  -2   4    0.63    1.65 
  -1  -2  -5   28.67    4.54 
  -1   2  -5   25.03    5.18 
   1  -2   5   22.27    5.65 
   1   2   5   25.28    4.47 
  -1  -2  -6  123.55   10.72 
  -1   2  -6  129.10   13.31 
   1  -2   6  143.68   14.46 
   1   2   6  123.49   10.44 
  -1   2  -7    3.51    2.59 
   1   2   7    5.25    3.07 
   1  -2   7    5.08    3.00 
  -1  -2  -7    3.57    2.48 
   1   2   8   14.15    4.18 
  -1  -2  -8   13.18    3.94 
   1  -2   8   15.80    5.71 
   1  -2   8   20.64    6.37 
   1   2   9   24.20    5.88 
  -1  -2  -9   23.16    5.45 
   1  -2   9   30.56    8.80 
   1  -2   9   27.41    7.96 
   1  -2  10   10.48    4.64 
   1  -2  10   16.07    6.14 
   1   2  10   19.70    7.37 
  -1  -2 -10   10.63    4.25 
   1   2  10   12.29    4.21 
   1   2  11    3.83    3.95 
   1  -2  11    6.77    4.73 
   1  -2  12    2.06    3.58 
   1   2  12   -1.11    3.11 
   1   2  13    5.28    2.02 
   1  -2  13   11.52    6.01 
   1   2  14    4.63    3.70 
   1  -2  14    7.59    6.62 
   1   2  15    1.90    3.65 
   1  -2  15    1.97    2.97 
   1   2  16   14.20    7.56 
   1  -2  16   13.83    6.11 
   1  -2  17    3.34    5.11 
   1   2  17    1.22    4.11 
   1   2  18   -7.24    7.27 
   1  -2  18    0.67    4.80 
   1   2  19   -4.55    5.87 
   1  -2  19   -3.97    6.75 
   1  -2  20   -2.36    5.03 
   1  -2  21  -11.78    5.19 
   1  -2  22  -16.48   12.28 
  -1  -3  23   19.11   12.85 
  -1  -3  22    6.14    9.88 
  -1  -3  21    8.96    6.47 
  -1  -3  20  -11.86    8.73 
  -1  -3  19   -2.18    6.83 
  -1  -3  18    3.19    6.69 
  -1   3  17    5.76    4.17 
  -1  -3  17    1.26    3.17 
  -1  -3  16   -7.47    6.47 
  -1   3  16    0.95    1.07 
  -1   3  15   10.43    4.69 
  -1  -3  15    8.36    5.81 
  -1   3  14    2.19    1.42 
  -1  -3  14    0.57    3.68 
  -1  -3  13    3.60    4.04 
  -1   3  13   -1.27    1.96 
   1   3 -13   -6.55    6.92 
   1   3 -12    5.77    5.10 
  -1   3  12    2.43    2.62 
  -1  -3  12    6.80    5.02 
  -1   3  11    4.13    2.31 
  -1  -3  11    3.78    2.72 
  -1  -3  11   12.28    5.65 
  -1   3  11    3.85    4.45 
   1   3 -11    3.58    2.84 
  -1  -3  10    7.19    4.69 
  -1   3  10    8.80    2.86 
   1   3 -10   15.17    5.95 
  -1   3  10   11.43    4.85 
  -1   3   9    2.39    1.42 
  -1  -3   9   -4.49    4.58 
   1   3  -9   -3.97    2.33 
  -1   3   9   -0.76    2.11 
   1   3  -8   -1.34    3.05 
  -1   3   8   -1.02    2.71 
  -1   3   8    0.37    0.63 
  -1  -3   8    0.79    3.14 
   1   3  -7  152.09   15.58 
  -1  -3   7  169.54   16.06 
  -1   3   7  168.97    8.07 
   1   3  -6    5.13    3.31 
   1  -3  -6    3.64    1.13 
  -1  -3   6    9.03    3.91 
   1   3  -5   54.55    8.57 
  -1  -3   5   59.44    8.67 
   1  -3  -4   11.06    1.82 
  -1  -3   4    9.51    3.39 
   1   3  -4   12.73    4.11 
   1   3  -3   13.49    4.05 
  -1  -3   3    8.87    2.54 
   1   3  -2    1.33    1.69 
  -1   3   0   33.54    3.48 
  -1   3  -1  152.78    8.43 
   1  -3   2    8.70    2.57 
  -1   3  -2    9.77    2.82 
   1  -3   3    3.01    1.43 
  -1  -3  -3    0.24    1.16 
  -1   3  -3    1.62    1.31 
  -1   3  -4    3.02    2.70 
   1  -3   4    6.43    2.38 
  -1  -3  -4    7.15    1.99 
   1  -3   5   55.54    8.28 
  -1   3  -5   52.78    8.25 
  -1  -3  -5   53.06    6.14 
   1   3   5   50.45    6.12 
  -1   3  -6    2.66    3.14 
   1  -3   6   -1.71    3.33 
  -1  -3  -6    0.77    1.62 
   1   3   6    1.61    1.38 
  -1   3  -7   20.07    6.09 
   1   3   7   19.65    4.09 
  -1  -3  -7   20.89    4.74 
   1  -3   7   16.72    5.98 
  -1  -3  -8    0.45    1.51 
   1   3   8    3.06    1.77 
  -1   3  -8   -1.24    2.92 
   1  -3   8    1.63    4.04 
   1  -3   9   22.59    6.67 
   1  -3   9   19.83    7.00 
  -1  -3  -9   14.93    4.34 
   1   3   9   18.41    4.57 
   1  -3  10   -2.58    2.80 
   1  -3  10   -0.57    3.72 
  -1  -3 -10   -2.18    2.78 
   1   3  10   -1.52    2.91 
   1   3  11    1.73    1.68 
  -1  -3 -11   -2.07    2.50 
   1  -3  11   -0.89    3.30 
   1   3  12   13.76    5.64 
   1  -3  12   14.01    7.08 
   1   3  13    5.42    1.90 
   1  -3  13   15.72    7.62 
   1   3  14    7.53    4.53 
   1  -3  14   17.02    7.83 
   1   3  15   -3.77    4.09 
   1  -3  15   -0.88    3.69 
   1  -3  16    2.75    4.20 
   1   3  16   -1.50    2.68 
   1  -3  17   -3.28    6.74 
   1   3  17   -3.21    2.62 
   1  -3  18   -2.22    4.23 
   1  -3  19    5.94    5.86 
   1  -3  20    0.09    8.16 
   1  -3  21   11.53   11.26 
   1  -3  22   -8.44   11.74 
  -1  -4  22    8.38   11.38 
  -1  -4  21   16.97   12.51 
  -1  -4  20   -7.33   12.00 
  -1  -4  19   -5.87    6.00 
  -1  -4  18  -10.48    9.18 
  -1  -4  17    9.65    7.80 
  -1   4  16    8.37    3.30 
  -1  -4  16    2.48    6.08 
  -1   4  15   33.29    6.43 
  -1  -4  15   23.69   10.14 
   1   4 -14   10.71    6.81 
  -1  -4  14    4.30    2.69 
  -1   4  14    9.74    3.41 
  -1  -4  13    6.46    5.36 
  -1   4  13    2.19    1.01 
   1   4 -13    0.14    2.88 
   1   4 -12   -1.00    4.61 
  -1  -4  12    0.03    2.34 
  -1   4  12    5.49    1.71 
  -1   4  11   16.68    3.30 
  -1  -4  11   12.59    5.17 
  -1   4  11   24.66    7.87 
   1   4 -11   11.00    5.16 
  -1   4  10   60.58   11.11 
   1   4 -10   32.20    8.57 
  -1   4  10   42.39    4.82 
  -1  -4  10   39.99    8.35 
   1   4  -9    4.06    3.10 
  -1  -4   9    7.11    3.72 
  -1   4   9    8.75    4.05 
   1   4  -8   -0.10    1.95 
  -1  -4   8   -0.64    2.38 
  -1  -4   7    0.80    2.51 
   1  -4  -7   -0.70    0.77 
   1   4  -7   -4.29    2.76 
  -1  -4   6   11.70    4.82 
   1   4  -6    7.38    3.70 
   1  -4  -6    7.14    1.41 
   1  -4  -5    2.49    1.00 
  -1  -4   5    3.14    2.06 
   1   4  -5    2.07    1.41 
   1   4  -4    6.98    3.40 
   1   4  -3   64.67    8.43 
   1   4  -2   17.85    4.10 
  -1   4   0   73.59    6.20 
  -1   4  -1    3.80    1.50 
  -1   4  -2   -0.36    1.80 
  -1  -4  -3   53.44    6.48 
  -1   4  -3   46.62    6.59 
   1  -4   3   60.15    7.32 
   1  -4   4   75.87    8.97 
  -1  -4  -4   74.47    7.73 
  -1   4  -4   70.11    9.17 
  -1   4  -5    0.24    2.58 
  -1  -4  -5    3.78    1.25 
   1  -4   6    0.28    2.71 
  -1   4  -6   -0.43    1.62 
  -1  -4  -6    0.08    1.78 
   1  -4   7   18.10    6.27 
  -1   4  -7   15.85    5.64 
  -1  -4  -7   15.97    3.87 
   1  -4   8   19.21    5.86 
  -1   4  -8   16.94    6.17 
  -1  -4  -8   13.29    4.33 
   1   4   8   17.29    3.81 
   1  -4   9   49.07   10.33 
   1  -4   9   38.64    9.97 
   1   4   9   46.67    7.25 
  -1  -4  -9   42.39    6.84 
  -1   4  -9   44.11    9.60 
   1   4  10    2.31    1.80 
   1  -4  10   -2.30    3.15 
  -1  -4 -10    1.90    1.14 
  -1   4 -10   -4.01    4.97 
   1  -4  10    0.01    4.60 
   1   4  11   -2.63    1.74 
  -1  -4 -11   -0.94    2.27 
   1  -4  11   -1.92    5.46 
   1   4  12    1.76    2.27 
   1  -4  12    2.69    2.75 
   1   4  13   -2.53    1.74 
   1  -4  13   -6.06    7.71 
   1  -4  14    2.66    4.77 
   1   4  14    6.54    3.85 
   1   4  15   -3.89    4.41 
   1  -4  15    3.39    6.05 
   1   4  16    5.64    3.71 
   1  -4  16    3.09    4.96 
   1  -4  17    3.39    3.24 
   1  -4  18    4.45    3.72 
   1  -4  19   -3.65    7.21 
   1  -4  20   12.85    5.39 
   1  -4  21   11.68    7.18 
  -1  -5  20    4.48    8.95 
  -1  -5  19    1.39    4.37 
  -1  -5  18   15.98   10.15 
  -1  -5  17   -5.48    7.70 
  -1  -5  16   -0.13    7.52 
  -1  -5  15  -11.16    8.62 
  -1  -5  14   -3.82    6.51 
   1   5 -14   -2.08    2.63 
   1   5 -13   18.49    6.49 
  -1  -5  13    9.52    6.14 
   1   5 -12    2.06    3.42 
  -1  -5  12    1.06    4.01 
  -1  -5  11    9.54    7.03 
   1   5 -11    1.75    2.50 
   1   5 -10   -1.85    2.57 
  -1  -5  10   -3.36    2.68 
  -1   5  10    1.32    2.86 
   1   5  -9   50.41   10.46 
  -1  -5   9   82.94   13.10 
  -1  -5   8   12.51    5.19 
   1   5  -8   17.59    6.10 
  -1  -5   7   21.67    5.62 
   1  -5  -7   22.45    3.15 
   1   5  -7   21.43    6.96 
  -1  -5   6    7.72    3.49 
   1   5  -6    5.08    3.22 
   1  -5  -6    7.21    1.89 
   1   5  -5   -1.02    3.13 
   1  -5  -5    1.98    1.23 
   1   5  -4   25.22    6.14 
   1   5  -3    2.14    1.97 
   1   5  -2    1.63    1.28 
   1   5  -1   10.62    3.82 
  -1   5   0   13.73    3.36 
  -1   5  -1    7.82    2.23 
  -1   5  -2   15.79    4.12 
  -1  -5  -3   -0.16    1.30 
  -1   5  -3    1.92    2.07 
  -1  -5  -4   10.10    3.34 
   1  -5   4    9.90    4.02 
  -1   5  -4    7.41    3.16 
   1  -5   5    2.66    1.51 
  -1  -5  -5    3.15    1.82 
  -1   5  -5    5.63    2.25 
   1  -5   6   15.62    6.64 
  -1   5  -6   13.46    4.98 
  -1  -5  -6   11.84    3.45 
   1  -5   6    5.25    1.88 
   1  -5   7   -2.12    2.12 
  -1   5  -7    0.01    1.59 
   1  -5   7   -1.12    1.95 
  -1  -5  -7    1.81    2.17 
  -1   5  -8   30.79    8.20 
   1  -5   8   20.49    7.95 
   1  -5   8   33.84    8.38 
  -1  -5  -8   21.53    4.77 
  -1   5  -9   -0.40    2.18 
   1  -5   9    4.36    2.18 
  -1  -5  -9    0.13    1.01 
   1  -5  10   23.69    8.08 
   1  -5  10   11.92    7.06 
  -1   5 -10   10.79    5.21 
  -1  -5 -10   10.89    3.74 
  -1  -5 -11    2.09    1.92 
   1  -5  11   -1.06    2.46 
   1  -5  12    3.00    5.14 
   1  -5  13   -1.88    2.88 
   1   5  13    0.95    2.92 
   1   5  14    3.59    2.11 
   1  -5  14    6.77    5.53 
   1  -5  15    8.48    7.46 
   1  -5  16   17.19   10.74 
   1  -5  17   -1.91    3.91 
   1  -5  18   -1.37    6.26 
   1  -5  19   -3.51    5.61 
   1  -5  20   18.72    7.48 
  -1  -6  19   17.79   10.77 
  -1  -6  18   -6.65    6.24 
  -1  -6  17   10.75    8.78 
  -1  -6  16    8.03    8.68 
  -1  -6  15   15.16    8.13 
   1   6 -15    4.43    4.83 
   1   6 -14   -1.25    6.10 
  -1  -6  14    2.25    2.70 
  -1  -6  13   -4.35    4.75 
   1   6 -13    3.07    2.85 
  -1  -6  12   -0.39    5.05 
   1   6 -12   -1.44    2.91 
   1   6 -11    3.93    4.33 
  -1  -6  11   -2.49    4.50 
   1   6 -10    9.95    6.06 
  -1   6  10   19.02    7.06 
  -1  -6   9   -4.90    5.05 
   1   6  -9    0.06    3.11 
   1  -6  -8   23.77    2.83 
   1   6  -8   40.07    9.87 
  -1  -6   8   36.87    7.74 
   1   6  -7   -3.40    4.23 
   1  -6  -7    2.26    1.39 
   1   6  -6   27.79    7.36 
   1  -6  -6   32.48    5.04 
   1   6  -5    0.08    1.75 
   1  -6  -5    0.05    1.02 
   1   6  -4   10.28    4.76 
   1   6  -3    5.08    2.80 
   1   6  -2    6.31    3.25 
   1   6  -1   30.40    6.17 
  -1   6   0   23.86    4.73 
  -1   6  -1   -0.11    1.19 
  -1   6  -2    6.69    3.10 
  -1   6  -3   32.18    6.63 
  -1   6  -4    4.72    2.91 
  -1  -6  -4    7.30    2.83 
  -1   6  -5   28.44    6.98 
  -1  -6  -5   37.60    6.55 
  -1   6  -6    0.20    2.09 
   1  -6   6    0.34    1.46 
  -1  -6  -6   -0.48    2.22 
   1  -6   7    9.66    6.09 
  -1  -6  -7    3.28    1.87 
   1  -6   7    7.49    3.45 
  -1   6  -7   11.69    4.31 
   1  -6   8  123.63   20.31 
  -1   6  -8  110.42   15.17 
   1  -6   8  144.20   16.75 
  -1  -6  -8  110.99   11.28 
   1  -6   9   29.87    8.34 
   1  -6   9   28.07    9.98 
  -1   6  -9   22.08    7.52 
  -1  -6  -9   21.36    4.31 
  -1  -6 -10    5.49    3.00 
   1  -6  10    5.53    5.73 
  -1   6 -10    7.81    5.06 
  -1   6 -11   13.75    6.88 
   1  -6  11   14.80    9.02 
  -1  -6 -11   10.96    3.17 
   1  -6  12   -3.29    8.63 
   1  -6  13    4.21    8.11 
   1  -6  14   -0.83    3.82 
   1  -6  15    0.46    5.96 
   1  -6  16   -4.25    6.00 
   1  -6  17   16.08    8.76 
   1  -6  18   -3.28    7.14 
  -1  -7  18  -13.52    5.63 
  -1  -7  17   -0.95    7.95 
  -1  -7  16    7.77    6.10 
  -1  -7  15   -4.38    6.48 
   1   7 -15   -6.25    6.41 
  -1  -7  14    5.88    5.87 
   1   7 -14    1.69    6.49 
  -1  -7  13   10.62    4.41 
   1   7 -13    8.28    6.03 
   1   7 -12    5.56    5.04 
  -1  -7  12    5.20    5.04 
   1   7 -11   37.20   11.31 
  -1  -7  11   37.76   13.33 
  -1   7  10   -0.04    2.47 
   1   7 -10    4.25    4.77 
   1   7  -9   -2.44    3.51 
   1  -7  -8   27.24    3.55 
   1   7  -8   42.08   10.04 
   1   7  -7    6.83    5.49 
   1  -7  -7    4.93    1.69 
   1  -7  -6  105.03    9.97 
   1   7  -6   85.75   13.13 
   1  -7  -5   -0.60    3.28 
   1   7  -5    3.31    4.63 
   1   7  -4    9.65    5.13 
   1   7  -3   -1.65    2.72 
   1   7  -2    2.26    2.30 
   1   7  -1   12.41    4.47 
  -1   7   1   10.36    2.85 
   1   7   0    9.19    3.90 
  -1   7   0    9.00    2.85 
  -1   7  -1   58.28    7.82 
  -1   7  -2    1.65    2.02 
  -1   7  -3    3.41    2.78 
  -1  -7  -4    0.35    2.33 
  -1   7  -4    0.36    1.77 
  -1   7  -5   39.18    8.55 
  -1  -7  -5   43.05    8.04 
   1  -7   6    7.36    4.82 
  -1   7  -6    9.12    3.95 
  -1  -7  -6   10.01    3.57 
  -1   7  -7    9.70    4.53 
   1  -7   7    2.16    3.12 
  -1  -7  -7    7.63    4.05 
   1  -7   8   14.12    6.82 
  -1  -7  -8    7.45    2.71 
   1  -7   8    8.02    3.82 
  -1   7  -8   14.62    5.65 
  -1   7  -9    2.04    4.63 
  -1  -7  -9    8.23    3.50 
   1  -7   9    4.48    6.34 
   1  -7   9   12.61    7.43 
   1  -7  10   -0.56    3.89 
  -1   7 -10   -2.33    5.05 
   1  -7  11    1.47    4.03 
  -1   7 -11   -0.67    2.64 
   1  -7  12    2.97    4.85 
   1  -7  13  -11.72    9.35 
   1  -7  14    3.63    4.12 
   1  -7  15    0.48    5.20 
   1  -7  16   17.76   11.34 
   1  -7  17    6.30    6.84 
  -1  -8  16   19.20    7.26 
  -1  -8  15   -0.18    3.68 
  -1  -8  14   18.42   10.43 
   1   8 -14    9.35    8.45 
  -1  -8  13    5.25    4.06 
   1   8 -13   -5.11    4.21 
   1   8 -12    0.70    4.55 
  -1  -8  12   -0.59    5.49 
  -1  -8  11   -2.39    3.63 
   1   8 -11    8.75    5.24 
   1   8 -10   -0.77    2.05 
  -1  -8  10    7.80    6.48 
   1   8  -9    4.54    4.05 
   1   8  -8    6.82    4.94 
   1  -8  -8    2.40    1.08 
   1  -8  -7    2.91    1.23 
   1   8  -7   -3.61    4.61 
   1  -8  -6    4.67    1.56 
   1   8  -6    2.98    3.51 
   1  -8  -5   30.56    6.15 
   1   8  -5   26.51    8.02 
   1   8  -4    2.12    4.13 
   1   8  -3    2.67    3.91 
   1   8  -2   20.89    6.67 
  -1   8   2   22.70    4.88 
  -1   8   1   -0.61    1.33 
   1   8  -1    4.86    2.13 
  -1   8   0   -1.46    1.97 
   1   8   0    0.08    2.74 
  -1   8  -1    0.25    1.52 
  -1   8  -2   15.85    4.68 
  -1   8  -3    1.11    2.12 
  -1   8  -4    8.15    4.34 
  -1  -8  -4    8.01    3.91 
  -1   8  -5    4.01    2.95 
  -1  -8  -5    1.77    3.85 
   1  -8   5    1.68    2.15 
  -1  -8  -6   -0.55    4.14 
   1  -8   6    2.43    3.71 
  -1   8  -6   -1.20    1.46 
   1  -8   7    8.40    7.57 
  -1   8  -7    1.50    4.14 
  -1   8  -8   -1.37    4.20 
   1  -8   8   -0.77    4.58 
  -1   8  -9    2.48    4.93 
   1  -8   9   -5.67    7.25 
  -1   8 -10   21.12    7.15 
   1  -8  10   21.11   10.12 
   1  -8  11   12.53    7.33 
   1  -8  12   -0.34    5.13 
   1  -8  13   -0.59    6.88 
   1  -8  14   -4.99    8.08 
   1  -8  15    9.67    8.19 
   1   9 -14   -6.82    7.95 
  -1  -9  14  -10.28    9.64 
  -1  -9  13   17.92   12.23 
   1   9 -13    4.80    6.45 
  -1  -9  12   22.05    8.36 
   1   9 -12    3.66    2.98 
  -1  -9  11   -8.35    8.84 
   1   9 -11   -5.00    4.92 
  -1  -9  10    1.73    2.99 
   1   9 -10    1.98    3.68 
   1   9  -9   -5.88    6.58 
  -1  -9   9   -2.65    5.39 
   1   9  -8   -6.08    4.90 
   1   9  -7   10.92    6.86 
   1  -9  -6    1.10    1.70 
   1   9  -6    2.32    2.24 
   1   9  -5    3.28    1.97 
   1   9  -4    5.53    4.11 
  -1   9   3    6.24    3.69 
   1   9  -3    2.09    2.27 
  -1   9   2    1.98    1.18 
   1   9  -2    8.11    4.14 
   1   9  -1   37.96    8.66 
  -1   9   1   35.86    6.03 
   1   9   0   26.51    7.85 
  -1   9   0   18.74    4.06 
   1   9   1    6.41    4.92 
  -1   9  -1    2.83    1.93 
   1  -9   2   13.32    6.73 
  -1   9  -2   19.40    5.90 
  -1   9  -3    3.73    2.58 
   1  -9   3    3.59    4.07 
   1  -9   4   -2.85    2.94 
  -1   9  -4    0.40    3.89 
  -1   9  -5    8.54    4.47 
   1  -9   5   24.47   10.19 
  -1   9  -6    4.40    3.85 
   1  -9   6   12.18    6.49 
   1  -9   7   11.16    7.67 
  -1   9  -7   -1.63    3.00 
  -1   9  -8    2.38    3.56 
   1  -9   8    5.56    8.21 
  -1   9  -9   -0.70    4.44 
   1  -9   9   -0.44    2.88 
  -1   9 -10    3.83    2.60 
   1  -9  10    0.39    6.00 
   1  -9  11   -0.12    4.29 
   1  -9  12  -12.96    8.93 
   1  -9  13   20.13   12.53 
   1  -9  14   -5.33    6.14 
  -1 -10  12    3.00    3.79 
  -1 -10  11    6.08    5.97 
  -1 -10  10    1.90    8.10 
   1  10  -9   -4.25    4.87 
  -1 -10   9   10.53    9.85 
   1  10  -8    5.41    5.31 
  -1 -10   8    9.61    6.65 
   1  10  -7   -4.44    4.49 
   1  10  -6   -4.71    3.24 
   1  10  -5   -1.32    3.11 
   1 -10  -4    0.51    2.19 
   1  10  -4   -0.11    4.03 
   1 -10  -3    4.59    4.50 
   1  10  -3    0.34    3.20 
   1 -10  -2    1.19    2.70 
   1  10  -2    1.27    2.44 
   1  10  -1    0.72    4.81 
   1 -10  -1    2.23    2.38 
   1 -10   0   -0.19    3.64 
   1  10   0    1.43    1.59 
   1 -10   1   -3.15    6.00 
   1  10   1   -1.99    3.54 
   1 -10   2    3.06    2.32 
   1  10   2   -1.88    3.31 
   1 -10   3    3.69    4.70 
   1 -10   4    5.12    3.26 
   1 -10   5   10.42    5.75 
   1 -10   6   -0.28    3.04 
   1 -10   7   -7.34    7.46 
   1 -10   8   12.40    9.13 
   1 -10   9   20.06   10.98 
   1 -10  10  -15.96   12.50 
   1 -10  11    3.53    4.97 
   1 -10  12   -4.10   11.92 
  -1 -11  10   -9.81   10.03 
  -1 -11   9   -5.78    6.18 
  -1 -11   8   14.03   10.66 
  -1 -11   7   25.37   10.55 
  -1 -11   6    7.95    9.72 
  -1 -11   5   -8.77    8.06 
   1 -11  -2   -1.07    3.37 
   1 -11  -1    3.31    4.73 
   1 -11   0    6.51    4.53 
   1 -11   1    9.15    5.53 
   1 -11   2   12.05    4.95 
   1 -11   3   -5.67    8.19 
   1 -11   4   18.61    7.11 
   1 -11   5   11.77    9.18 
   1 -11   6  -10.84    7.64 
   1 -11   7   -2.19    6.29 
   1 -11   8   -0.26    7.97 
   1 -11   9   -5.78   10.80 
  -1 -12   7   -0.70    4.41 
  -1 -12   6  -14.87   11.40 
  -1 -12   5    2.08    4.28 
  -1 -12   4    1.82    4.57 
  -1 -12   3  -13.67    6.81 
  -1 -12   2   -8.34    6.52 
  -1 -12   1   41.71   13.92 
   1 -12   2   11.29    7.65 
   1 -12   3    8.66   12.07 
   1 -12   4   -7.99    9.29 
   1 -12   5    9.61    7.96 
   1 -12   6   22.41   14.81 
   1 -12   7   17.07    3.83 
  -2   0  22    1.79    4.82 
  -2   0  21    0.75    6.27 
  -2   0  20   19.40    9.76 
  -2   0  19   -8.44    7.47 
  -2   0  18   11.32    6.36 
  -2   0  17   -0.41    3.53 
  -2   0  16    1.94    3.90 
  -2   0  15   -1.49    3.73 
  -2   0  14  105.51   15.24 
  -2   0  13    1.77    3.26 
  -2   0  12    4.27    3.12 
  -2   0  11    1.87    1.48 
   2   0 -10   56.82   10.84 
  -2   0  10   63.80    9.65 
  -2   0   9   -2.51    2.61 
   2   0  -9    2.20    3.53 
   2   0  -8   15.02    4.89 
   2   0  -7   -1.69    1.90 
   2   0  -6   98.73   10.90 
   2   0  -5   -1.00    1.89 
   2   0  -4    1.06    1.48 
   2   0  -3    2.80    1.69 
  -2   0  -2   31.45    5.23 
  -2   0  -3    0.00    1.70 
  -2   0  -4   15.89    4.34 
  -2   0  -5   -2.37    3.21 
   2   0   5    1.20    2.15 
   2   0   6   20.91    5.78 
  -2   0  -6   20.74    5.69 
   2   0   7   -1.99    2.45 
  -2   0  -7    0.18    2.56 
   2   0   8   19.64    6.19 
  -2   0  -8   15.67    5.72 
   2   0   9    1.18    2.78 
  -2   0  -9    2.11    2.06 
   2   0  10   24.58    7.12 
   2   0  11   -1.29    2.52 
   2   0  12   11.91    5.42 
   2   0  13    5.98    3.54 
   2   0  14   13.14    6.88 
   2   0  15   -2.36    3.50 
   2   0  16   -5.87    6.50 
   2   0  17    4.52    5.21 
   2   0  18    4.66    4.05 
   2   0  19   -2.80    6.50 
   2   0  20    6.54    4.95 
   2   0  21    5.75    4.38 
  -2  -1  23    5.48    7.23 
  -2  -1  22   -2.65    7.15 
  -2  -1  21   -4.06    4.29 
  -2  -1  20   -2.13    4.67 
  -2   1  20    3.90    2.79 
  -2   1  19    7.80    3.82 
  -2  -1  19    9.12    5.72 
  -2   1  18    4.23    3.37 
  -2  -1  18   12.50    4.94 
  -2   1  17   -5.23    5.95 
  -2  -1  17    8.79    5.70 
  -2   1  16   10.75    5.22 
  -2  -1  16   12.14    7.07 
  -2   1  15   15.44    5.58 
  -2  -1  15   17.77    7.46 
  -2   1  14   67.36   11.68 
  -2  -1  14   57.75   13.19 
  -2   1  13   29.17    7.29 
  -2  -1  13   32.80    8.40 
  -2   1  12   14.29    4.60 
  -2  -1  12   12.41    4.47 
   2   1 -12    2.10    2.34 
  -2   1  12   18.04    6.79 
  -2   1  11   10.87    3.76 
  -2  -1  11    9.34    4.83 
   2   1 -11   13.02    6.35 
   2   1 -10   -4.08    3.46 
  -2   1  10   -3.57    2.78 
   2   1  -9   34.20    8.07 
  -2   1   9   23.82    5.08 
  -2   1   8   99.50    9.46 
   2   1  -8   99.67   12.74 
   2   1  -7    4.37    2.83 
  -2   1   7   13.28    3.15 
   2   1  -6    2.44    2.98 
   2  -1  -6   -1.60    1.81 
   2   1  -5    6.68    2.84 
   2  -1  -5   15.02    4.21 
   2  -1  -4    4.06    1.93 
   2   1  -4   -0.71    1.51 
   2  -1  -3  126.14    7.63 
   2   1  -3  128.03    9.24 
   2  -1  -2  150.72    6.52 
  -2   1   1   44.01    3.69 
  -2   1   0  103.14    7.09 
  -2   1  -1    3.40    2.08 
  -2  -1  -1    4.33    2.06 
  -2   1  -2    5.38    2.51 
  -2  -1  -2   -0.58    1.13 
  -2  -1  -3   85.57    8.14 
   2   1   3   75.62    7.42 
  -2   1  -3   67.52    8.11 
  -2  -1  -4    0.45    1.41 
  -2   1  -4    3.17    2.37 
   2   1   4    1.10    1.29 
  -2  -1  -5    8.48    3.17 
   2   1   5   14.70    3.96 
  -2   1  -5   13.45    3.80 
  -2  -1  -6    3.51    2.77 
   2   1   6    0.41    1.72 
  -2   1  -6    0.60    3.12 
  -2  -1  -7   36.36    7.01 
   2  -1   7   25.06    6.76 
   2   1   7   31.85    6.44 
   2   1   8    7.43    3.88 
  -2  -1  -8    2.54    1.42 
   2  -1   8    6.61    3.86 
   2   1   9   -0.28    3.02 
   2  -1   9    6.01    3.35 
   2  -1   9    3.59    3.99 
  -2  -1  -9   -1.08    2.44 
  -2  -1 -10   17.73    6.45 
   2   1  10   23.01    6.76 
   2  -1  10   26.35    8.29 
   2  -1  10   28.00    7.82 
   2  -1  11    4.28    2.31 
   2   1  11    6.57    3.42 
   2   1  12   -3.90    4.57 
   2  -1  12    5.75    5.11 
   2  -1  13  145.09   20.68 
   2   1  13  139.21   18.77 
   2  -1  14    7.67    5.04 
   2   1  14   11.87    6.02 
   2  -1  15   -1.90    6.80 
   2   1  15    0.50    3.02 
   2   1  16    8.38    6.57 
   2  -1  16   16.07    7.07 
   2  -1  17   -0.65    5.95 
   2   1  17    0.21    3.94 
   2   1  18   -2.69    5.82 
   2  -1  18    8.72    7.92 
   2  -1  19    4.10    4.18 
   2  -1  20   -0.90    8.27 
   2   1  20    3.84    5.58 
   2  -1  21    0.45    7.91 
   2  -1  22    5.58    9.89 
  -2  -2  23    3.37    8.64 
  -2  -2  22  -10.32   10.01 
  -2  -2  21    3.95    5.01 
  -2  -2  20    4.12    6.89 
  -2  -2  19   -4.39    5.22 
  -2   2  19   -3.85    6.21 
  -2   2  18   -2.23    2.81 
  -2  -2  18    2.00    3.98 
  -2  -2  17   -2.76    4.73 
  -2   2  17    5.58    3.54 
  -2  -2  16    5.37    5.76 
  -2   2  16   -1.47    1.70 
  -2   2  15    3.78    3.47 
  -2  -2  15    2.00    3.78 
  -2   2  14   52.08    9.90 
  -2  -2  14   52.64   12.59 
   2   2 -14   37.66   11.03 
  -2  -2  13   10.52    5.63 
   2   2 -13    3.69    2.91 
  -2   2  13    3.72    3.17 
   2   2 -12    0.80    1.92 
  -2   2  12    1.34    2.56 
  -2   2  12    0.69    3.51 
  -2  -2  12   -2.22    3.66 
  -2  -2  11    6.40    5.23 
   2   2 -11    3.79    2.35 
  -2   2  11    2.17    1.85 
  -2   2  11    6.21    3.19 
  -2  -2  10    7.89    4.45 
  -2   2  10    5.38    3.02 
   2   2 -10    5.11    3.49 
  -2   2  10    6.02    4.58 
  -2   2   9    4.78    2.34 
  -2   2   9    9.04    4.85 
   2   2  -9    4.29    3.42 
  -2   2   8  289.57   20.69 
   2   2  -8  269.15   21.55 
  -2   2   8  261.05   12.96 
  -2   2   7    4.21    2.23 
   2   2  -7    2.53    2.54 
  -2   2   7    2.01    1.13 
  -2   2   6    0.66    0.83 
   2   2  -6   -2.25    2.38 
  -2   2   6    0.39    1.82 
  -2   2   5   14.85    3.38 
   2   2  -5   15.39    4.81 
  -2   2   4    5.89    2.33 
   2   2  -4    1.68    1.93 
  -2   2   3   17.38    2.68 
   2   2  -3   18.51    4.08 
  -2   2   2   72.86    4.05 
   2  -2  -2   70.95    4.51 
   2   2  -2   74.53    7.44 
  -2  -2  -1   65.20    7.14 
   2  -2   1   67.89    4.88 
   2   2   2   20.68    3.71 
  -2  -2  -2   16.54    3.63 
   2  -2   2   18.09    3.30 
   2   2   3    7.43    2.84 
  -2  -2  -3   10.04    3.31 
   2  -2   3    4.57    2.12 
   2   2   4   -2.76    2.07 
  -2  -2  -4    0.45    1.28 
   2  -2   4   -2.38    2.16 
   2  -2   5   34.53    6.64 
   2   2   5   35.63    5.70 
  -2  -2  -5   40.47    6.34 
  -2  -2  -6   60.73    8.03 
   2   2   6   55.37    7.70 
   2  -2   6   57.16    8.75 
  -2  -2  -7   52.68    7.76 
   2   2   7   46.11    7.35 
   2  -2   7   49.94    8.92 
   2  -2   8   -2.94    3.84 
   2   2   8    1.32    2.62 
  -2  -2  -8    1.95    2.38 
   2  -2   8    2.07    3.59 
   2   2   9   19.19    4.82 
   2  -2   9   24.18    7.78 
   2  -2   9   25.58    7.47 
  -2  -2  -9   21.92    5.79 
   2  -2  10   -4.55    5.36 
  -2  -2 -10    2.15    3.04 
   2   2  10    1.33    2.09 
   2  -2  10    2.08    2.68 
   2   2  11   21.14    6.77 
   2  -2  11   16.77    6.87 
  -2  -2 -11   15.81    6.84 
   2   2  12   15.34    6.03 
   2  -2  12   15.09    6.93 
   2   2  13   12.49    6.16 
   2  -2  13   14.03    6.57 
   2  -2  14   10.61    6.69 
   2   2  14    3.61    3.23 
   2   2  15   -0.91    2.53 
   2  -2  15    2.68    6.33 
   2   2  16    1.04    2.73 
   2  -2  16    5.99    4.39 
   2   2  17   -2.20    3.32 
   2  -2  17    4.05    5.28 
   2  -2  18   10.20    7.80 
   2   2  18   11.50    7.95 
   2  -2  19  -10.86    9.65 
   2   2  19   -7.01    4.23 
   2  -2  20    3.55    4.25 
   2  -2  21   -2.73    6.30 
   2  -2  22   -6.06    5.29 
  -2  -3  23    4.76    4.62 
  -2  -3  22    2.04    7.57 
  -2  -3  21   14.75   11.00 
  -2  -3  20    4.77    8.01 
  -2  -3  19   -7.38    8.01 
  -2  -3  18   16.00    9.27 
  -2  -3  17   -5.33    5.40 
  -2   3  17   -2.93    2.49 
  -2   3  16    1.22    1.74 
  -2  -3  16   -3.23    4.57 
   2   3 -15   15.94    8.61 
  -2  -3  15   13.32    7.07 
  -2   3  15   10.41    3.83 
  -2  -3  14    3.43    3.38 
   2   3 -14    4.82    6.41 
  -2   3  14    2.21    1.55 
  -2   3  13   -0.70    1.21 
   2   3 -13    4.68    3.37 
  -2  -3  13    0.01    2.27 
   2   3 -12    8.32    5.30 
  -2   3  12    9.24    5.19 
  -2   3  12    5.26    2.06 
  -2   3  11    1.67    1.60 
  -2  -3  11    3.83    4.07 
  -2   3  11    2.05    3.40 
   2   3 -11    2.26    4.32 
  -2  -3  10    4.89    3.30 
  -2   3  10   -0.27    3.95 
  -2   3  10    0.64    1.08 
   2   3 -10    3.45    3.86 
  -2   3   9    4.49    2.63 
   2   3  -9    1.26    2.34 
  -2   3   9    4.47    0.92 
  -2  -3   9    7.71    4.19 
   2   3  -8    8.07    4.36 
  -2   3   8   19.85    5.81 
  -2  -3   8    9.88    3.42 
  -2   3   8   15.81    2.06 
  -2  -3   7  117.09   13.31 
  -2   3   7  124.46   12.59 
   2   3  -7  120.02   14.06 
  -2   3   6   32.89    6.10 
  -2  -3   6   37.58    7.25 
   2   3  -6   27.35    6.91 
  -2  -3   5  105.49   11.58 
   2   3  -5  116.43   12.27 
  -2   3   5  125.26   10.30 
   2   3  -4   -1.79    2.59 
  -2  -3   4   -1.98    2.31 
   2   3  -3   10.24    3.53 
   2  -3  -3   11.01    2.00 
   2   3  -2    1.88    1.54 
   2  -3  -2    0.27    0.95 
   2  -3  -1    3.20    1.86 
  -2   3   0    3.31    1.18 
   2  -3   0    2.69    1.91 
  -2   3  -1   29.64    3.67 
   2  -3   1   31.51    3.36 
   2  -3   2   -1.32    1.59 
  -2   3  -2    0.18    1.03 
  -2  -3  -2   -0.34    1.69 
  -2   3  -3    0.06    1.80 
  -2  -3  -3   -0.44    2.27 
   2  -3   3    1.08    1.37 
   2   3   4    1.58    2.47 
  -2  -3  -4   -0.50    2.20 
   2  -3   4    0.39    1.92 
  -2   3  -4   -1.92    1.60 
  -2  -3  -5  107.15   10.26 
   2  -3   5   99.96   10.98 
   2   3   5  102.30   10.32 
  -2   3  -5  103.32   11.02 
   2   3   6  101.78   10.19 
   2  -3   6   99.47   12.15 
  -2  -3  -6   92.24   10.26 
   2   3   7  103.45   11.08 
  -2  -3  -7  100.42   10.78 
   2  -3   7  104.14   13.14 
  -2  -3  -8    5.80    2.57 
   2   3   8    6.58    3.70 
   2  -3   8    3.10    2.23 
   2   3   9    1.83    2.38 
   2  -3   9    0.44    3.05 
   2  -3   9   -1.49    3.68 
  -2  -3  -9    0.79    1.66 
   2   3  10    1.74    2.09 
  -2  -3 -10   -1.36    2.85 
   2  -3  10    6.91    5.58 
   2  -3  10   -1.71    4.16 
   2  -3  11    3.80    3.40 
  -2  -3 -11   -0.20    1.80 
   2   3  11    0.70    1.68 
  -2  -3 -12   11.04    4.16 
   2   3  12    7.60    4.88 
   2  -3  12   12.03    6.84 
   2  -3  13   -0.25    3.51 
   2   3  13    1.72    3.25 
   2  -3  14    4.07    3.76 
   2   3  14    4.72    3.19 
   2   3  15    4.40    5.17 
   2  -3  15    2.96    6.21 
   2   3  16    1.95    5.05 
   2  -3  16    1.35    3.53 
   2   3  17   -0.10    1.84 
   2  -3  17    2.04    4.90 
   2  -3  18   -0.66    4.93 
   2  -3  19    4.52    4.25 
   2  -3  20    8.63    6.45 
   2  -3  21  -13.78   12.87 
  -2  -4  22   14.43    8.43 
  -2  -4  21    2.03    3.44 
  -2  -4  20   -5.76    6.29 
  -2  -4  19    1.17    6.36 
  -2  -4  18   -5.21    5.04 
  -2  -4  17    4.62    4.60 
  -2  -4  16    9.64    7.48 
  -2   4  16    6.08    2.68 
  -2   4  15   10.42    3.53 
  -2  -4  15   11.92    7.79 
   2   4 -15   12.97    7.40 
  -2   4  14   10.95    2.93 
  -2  -4  14   15.30    8.20 
   2   4 -14    5.94    5.68 
  -2  -4  13   -1.87    3.82 
  -2   4  13    3.69    1.21 
   2   4 -13    6.14    5.86 
  -2   4  12   -0.27    1.01 
   2   4 -12   -2.39    1.91 
  -2   4  11   -1.68    1.84 
   2   4 -11   -0.15    2.58 
   2   4 -10    8.10    4.37 
  -2  -4  10   14.80    5.80 
  -2   4  10   11.32    5.99 
  -2   4   9   -1.59    2.35 
   2   4  -9    1.99    2.73 
  -2  -4   8   -0.47    4.15 
   2   4  -8    5.18    3.55 
  -2   4   8    4.34    2.89 
  -2  -4   7   22.53    6.39 
   2   4  -7   15.86    5.78 
  -2   4   7   25.12    5.93 
  -2  -4   6   18.47    5.01 
   2   4  -6   14.81    4.68 
   2  -4  -5    0.26    0.50 
   2   4  -5   -0.58    2.00 
   2  -4  -5   -1.13    0.78 
   2   4  -4    0.45    2.05 
   2   4  -3   -0.28    1.78 
   2   4  -2  197.66   15.05 
  -2   4   1    2.77    1.04 
  -2   4   0    5.46    1.61 
   2  -4   1    9.46    3.70 
  -2   4  -1   12.23    2.71 
  -2  -4  -2    1.00    1.29 
   2  -4   2   -2.81    3.06 
   2  -4   2    1.01    1.29 
  -2   4  -2   -1.64    1.85 
  -2  -4  -3    5.31    2.57 
  -2   4  -3   -0.45    1.36 
   2  -4   3    6.50    3.11 
  -2   4  -4   31.68    6.04 
  -2  -4  -4   46.37    6.90 
   2  -4   4   42.15    6.80 
  -2   4  -5   14.40    5.08 
   2  -4   5   25.66    5.55 
  -2  -4  -5   22.07    4.68 
  -2  -4  -6   26.88    5.67 
   2  -4   6   28.96    7.03 
  -2   4  -6   21.83    5.96 
   2   4   7    0.60    1.40 
   2  -4   7    0.83    2.28 
  -2   4  -7    1.97    2.45 
  -2  -4  -7    3.38    2.06 
   2  -4   8    2.37    2.40 
   2   4   8    0.33    2.33 
   2  -4   8    2.90    3.80 
  -2  -4  -8    0.74    1.67 
   2  -4   9    2.87    3.65 
   2  -4   9   -3.82    3.99 
   2   4   9    2.67    1.81 
  -2  -4  -9   -1.27    1.68 
   2  -4  10   -0.18    3.47 
   2  -4  10   -2.87    3.81 
  -2  -4 -10    3.14    2.00 
   2   4  10    1.25    1.65 
   2  -4  11    9.87    5.82 
   2   4  11   15.04    5.20 
  -2  -4 -11    8.83    4.00 
  -2  -4 -12   12.73    5.12 
   2  -4  12   12.69    8.13 
   2   4  12    8.44    3.69 
   2   4  13   -2.65    3.32 
   2  -4  13   -2.08    2.97 
   2   4  14    3.47    4.61 
   2  -4  14   -0.64    3.77 
   2   4  15    0.65    3.92 
   2  -4  15   -5.78    6.17 
   2  -4  16    3.91    5.57 
   2   4  16    2.26    4.12 
   2  -4  17   -0.80    4.29 
   2  -4  18   -6.33    8.73 
   2  -4  19   25.74   12.12 
   2  -4  20   -1.35    6.61 
  -2  -5  21    7.87   12.98 
  -2  -5  20    5.08    6.82 
  -2  -5  19   12.21    6.38 
  -2  -5  18   -5.01    6.75 
  -2  -5  17    9.92    6.64 
  -2  -5  16    0.50    3.05 
   2   5 -16    0.23    3.21 
  -2  -5  15    0.42    5.81 
   2   5 -15   -0.18    3.40 
   2   5 -14    7.79    6.35 
  -2  -5  14   -3.21    7.16 
  -2  -5  13    8.10    6.78 
   2   5 -13    7.12    5.99 
   2   5 -12   -6.85    6.25 
  -2   5  11   14.24    5.36 
   2   5 -11    2.46    4.31 
   2   5 -10   -2.17    2.97 
  -2   5  10    7.36    4.18 
  -2  -5   9    3.38    5.54 
   2   5  -9    3.88    3.63 
  -2   5   9    0.58    2.86 
  -2  -5   8   12.47    4.68 
   2   5  -8    7.65    4.34 
  -2   5   8   16.93    5.29 
  -2  -5   7   -3.45    2.77 
   2   5  -7    0.23    2.34 
   2  -5  -6   19.22    2.26 
   2  -5  -6   17.92    2.41 
   2   5  -6   22.53    6.44 
   2   5  -5    3.97    2.61 
   2   5  -4   12.63    4.83 
   2   5  -3   27.96    6.11 
   2   5  -2   10.49    3.73 
  -2   5   1    3.18    1.24 
  -2   5   0   75.31    6.37 
  -2   5  -1   44.41    5.60 
   2  -5   2   37.15    7.90 
  -2   5  -2   30.63    5.32 
  -2  -5  -3    7.51    3.37 
  -2   5  -3    6.23    2.78 
   2  -5   3    7.86    4.35 
  -2   5  -4    1.36    2.03 
  -2  -5  -4    0.05    1.60 
   2  -5   4    1.71    2.79 
   2  -5   4   -0.40    2.25 
   2  -5   5   33.38    9.39 
  -2   5  -5   32.45    6.85 
   2  -5   5   35.11    7.08 
  -2  -5  -5   41.35    6.97 
  -2   5  -6   -0.93    1.31 
   2  -5   6   -0.56    2.96 
   2  -5   6    4.13    2.51 
  -2  -5  -6    3.53    1.61 
  -2  -5  -7   37.32    6.76 
  -2   5  -7   39.25    8.61 
   2  -5   7   49.34    9.12 
   2  -5   7   35.61   10.10 
   2  -5   8    4.31    3.88 
  -2  -5  -8    1.87    2.50 
   2  -5   8    2.71    2.87 
  -2   5  -8   -0.45    3.47 
   2  -5   9   -0.82    3.25 
  -2  -5  -9    1.96    2.96 
   2  -5   9    1.23    4.49 
  -2  -5 -10    0.04    2.23 
   2  -5  10    0.03    2.36 
  -2  -5 -11   -0.72    1.54 
   2  -5  11    0.37    3.41 
   2   5  12    3.59    2.61 
  -2  -5 -12   -1.14    2.76 
   2  -5  12    4.26    4.75 
   2  -5  13   -3.38    5.86 
   2   5  13    2.44    2.61 
   2  -5  14    8.92    7.70 
   2   5  14   -1.31    1.78 
   2  -5  15   10.33    9.36 
   2  -5  16  -15.77   10.25 
   2  -5  17   -3.22    7.11 
   2  -5  18   18.65    6.87 
   2  -5  19    0.46    7.53 
  -2  -6  19   -1.70    7.90 
  -2  -6  18   -6.07    8.60 
  -2  -6  17    0.83    5.98 
  -2  -6  16    4.85    7.41 
   2   6 -16    3.50    6.68 
   2   6 -15    1.10    3.38 
  -2  -6  15   -0.13    5.26 
  -2  -6  14   -5.62    6.73 
   2   6 -14   -1.05    5.80 
  -2  -6  13    2.67    6.39 
   2   6 -13    1.02    2.56 
   2   6 -12    2.92    3.04 
   2   6 -11   -0.61    3.41 
  -2   6  11   -0.77    3.39 
   2   6 -10    4.27    3.42 
  -2   6  10   14.69    6.30 
  -2  -6   9   68.22   12.08 
   2   6  -9   51.67   11.42 
  -2   6   9   63.80   10.93 
   2   6  -8   11.36    6.10 
  -2   6   8    7.50    3.56 
   2   6  -7    9.37    3.70 
   2   6  -6   11.25    4.58 
   2  -6  -6   15.38    2.97 
   2  -6  -6   15.63    2.94 
   2   6  -5   -1.81    1.79 
   2   6  -4    1.46    2.99 
   2   6  -3    6.95    3.93 
   2   6  -2    3.04    2.82 
  -2   6   1   52.78    5.69 
  -2   6   0   -1.23    1.44 
  -2   6  -1    1.58    1.76 
  -2   6  -2    2.29    1.04 
   2  -6   2    3.89    2.58 
  -2   6  -3    2.52    1.69 
   2  -6   3    3.97    3.07 
  -2  -6  -3    8.31    3.60 
  -2  -6  -4   -0.10    2.30 
  -2   6  -4    1.36    2.24 
   2  -6   4   -1.19    2.08 
  -2  -6  -5    2.49    2.46 
   2  -6   5   10.52    4.89 
  -2   6  -5    6.35    2.85 
   2  -6   5    9.28    3.87 
  -2  -6  -6    0.91    2.65 
   2  -6   6   -1.47    2.62 
   2  -6   6    7.08    4.06 
  -2   6  -6    0.61    1.37 
  -2   6  -7   -0.12    2.50 
   2  -6   7    4.64    3.55 
  -2  -6  -7    1.85    1.29 
   2  -6   7   -1.44    3.27 
  -2   6  -8   20.62    6.52 
   2  -6   8   37.20    8.09 
   2  -6   8   37.17   10.85 
  -2  -6  -8   28.50    6.10 
   2  -6   9   17.84    5.66 
   2  -6   9   13.16    6.58 
  -2  -6  -9    7.57    4.10 
   2  -6  10    5.98    3.69 
  -2  -6 -10   -0.60    2.81 
   2  -6  11   -2.95    4.80 
  -2  -6 -11   -1.01    3.76 
   2  -6  12    2.93    3.51 
   2  -6  13   18.58   10.19 
   2  -6  14    5.66    5.20 
   2  -6  15    7.19    9.53 
   2  -6  16   16.45   10.13 
   2  -6  17   -4.70    3.78 
   2  -6  18    2.28    4.00 
  -2  -7  18   -0.24    3.44 
  -2  -7  17   12.04   12.12 
   2   7 -16    2.63    5.89 
  -2  -7  16    4.39    6.74 
  -2  -7  15    2.29    6.41 
   2   7 -15    5.16    6.45 
   2   7 -14    3.01    3.85 
  -2  -7  14   -7.85    6.48 
  -2  -7  13   11.94    7.85 
   2   7 -13   -0.44    2.81 
   2   7 -12    4.62    4.73 
   2   7 -11    4.44    2.76 
   2   7 -10   41.92   11.45 
  -2   7  10   70.29   12.72 
  -2   7   9   70.00   11.32 
   2   7  -9   49.57   12.08 
   2   7  -8   -1.19    3.39 
   2  -7  -7    9.52    2.23 
   2   7  -7   12.48    6.91 
   2  -7  -7    7.88    1.65 
   2  -7  -6    9.81    2.79 
   2  -7  -6    8.11    2.84 
   2   7  -6    5.30    3.49 
   2   7  -5   -0.34    2.97 
   2  -7  -5    0.52    1.00 
   2   7  -4    9.86    3.83 
   2   7  -3    0.23    1.39 
   2   7  -2    3.64    1.77 
  -2   7   2    8.47    2.30 
  -2   7   1    4.64    2.14 
   2   7  -1    0.07    2.37 
   2  -7   0   -1.53    3.01 
  -2   7   0    2.89    1.35 
   2  -7   1   -3.13    3.77 
  -2   7  -1   -0.96    1.58 
  -2   7  -2    2.43    1.86 
   2  -7   2    2.20    3.81 
   2  -7   3    1.56    2.30 
  -2   7  -3    5.12    3.47 
  -2  -7  -3    7.01    5.27 
   2  -7   4   83.15   15.44 
  -2  -7  -4  101.67   13.45 
  -2   7  -4   74.24   10.11 
  -2   7  -5    5.56    2.03 
  -2  -7  -5    7.58    3.74 
   2  -7   5    4.87    4.22 
  -2  -7  -6   34.45    8.10 
   2  -7   6   29.27   10.31 
  -2   7  -6   30.34    7.42 
  -2   7  -7   17.86    6.29 
   2  -7   7   22.55    8.56 
  -2  -7  -7   24.07    5.85 
  -2   7  -8    8.95    4.38 
   2  -7   8    6.50    5.01 
   2  -7   8   12.03    4.32 
  -2  -7  -8   11.32    5.03 
   2  -7   9   -3.22    4.03 
  -2  -7  -9   -1.30    4.32 
   2  -7  10    0.51    4.80 
   2  -7  11    6.68    8.25 
   2  -7  12    1.88    5.16 
   2  -7  13    4.57    7.91 
   2  -7  14   -1.46    4.20 
   2  -7  15    6.85    6.68 
   2  -7  16   -2.62   10.61 
   2   8 -16    4.09    6.88 
  -2  -8  16   -1.42    9.51 
  -2  -8  15    3.52    5.94 
   2   8 -15    0.82    3.71 
  -2  -8  14    0.42    5.30 
   2   8 -14   -3.08    6.70 
  -2  -8  13    6.77    6.51 
   2   8 -13    0.77    5.66 
  -2  -8  12   19.01    8.80 
   2   8 -12    7.46    4.66 
   2   8 -11   -5.07    4.91 
   2   8 -10   -0.52    3.63 
  -2   8   9    2.93    2.65 
   2   8  -9   -4.97    6.15 
  -2   8   8    3.67    2.86 
   2   8  -8   -0.35    3.58 
   2  -8  -7   -2.16    1.71 
   2  -8  -7    1.32    1.73 
   2   8  -7   -2.45    4.21 
   2   8  -6    6.30    5.49 
   2  -8  -6   10.87    2.88 
   2  -8  -6    7.36    3.39 
   2  -8  -5    1.24    1.95 
   2   8  -5   -3.90    5.36 
   2   8  -4   35.26    9.01 
   2  -8  -4   29.96    6.20 
   2   8  -3   10.54    4.92 
  -2   8   3   17.18    3.74 
   2  -8  -3   14.61    4.50 
  -2   8   2   -1.75    2.09 
   2  -8  -2    2.92    3.38 
   2   8  -2   -5.40    4.71 
   2  -8  -1    7.38    4.87 
   2   8  -1   11.27    5.85 
  -2   8   1    8.56    3.03 
  -2   8   0   21.46    4.34 
   2  -8   0   17.63    6.49 
   2   8   0   15.43    5.63 
  -2   8  -1    9.69    2.78 
   2  -8   1    7.26    2.03 
  -2   8  -2   25.80    5.36 
   2  -8   2   23.74    8.11 
   2  -8   3    8.63    5.07 
  -2   8  -3   14.32    4.87 
  -2  -8  -3   14.77    5.39 
   2  -8   4   41.01   11.31 
  -2  -8  -4   34.54    8.72 
  -2   8  -4   33.77    7.07 
  -2  -8  -5   -0.07    4.52 
  -2   8  -5    4.28    3.42 
   2  -8   5    5.06    6.01 
  -2  -8  -6   32.02    8.35 
  -2   8  -6   25.57    7.21 
   2  -8   6   16.80    7.70 
   2  -8   7   12.50    6.35 
  -2   8  -7   14.20    6.13 
  -2   8  -8    5.38    2.27 
   2  -8   8   -3.26    2.78 
   2  -8   9    5.23    7.70 
   2  -8  10   -3.98    4.52 
   2  -8  11  -14.27    9.46 
   2  -8  12   10.49    8.92 
   2  -8  13   11.53    8.91 
   2  -8  14    9.08    3.25 
   2  -8  15    2.97    7.61 
   2   9 -15   -0.94    3.46 
  -2  -9  14  -19.41   10.56 
   2   9 -14    9.67    8.87 
  -2  -9  13   -8.59    7.87 
   2   9 -13    5.36    4.49 
   2   9 -12    5.12    6.21 
  -2  -9  12    8.39    8.81 
  -2  -9  11   12.71    8.85 
   2   9 -11   -8.21    5.96 
   2   9 -10    5.17    5.21 
   2   9  -9    0.33    3.52 
   2   9  -8   10.84    5.34 
   2   9  -7   -4.19    5.80 
   2  -9  -6    4.66    2.71 
   2   9  -6    2.22    4.69 
   2  -9  -5   43.41    7.92 
   2   9  -5   30.57    9.49 
   2  -9  -4    7.39    1.39 
   2   9  -4    6.28    4.19 
  -2   9   4   12.25    4.26 
  -2   9   3    4.32    1.68 
   2  -9  -3    0.26    2.31 
   2   9  -3    0.83    2.24 
   2   9  -2    9.15    5.72 
   2  -9  -2   15.35    5.55 
  -2   9   2   16.54    3.58 
  -2   9   1    1.54    2.62 
   2   9  -1    0.96    3.60 
   2  -9  -1    5.34    3.80 
  -2   9   0    4.76    2.41 
   2  -9   0    1.88    3.79 
   2   9   0   -1.90    2.85 
  -2   9  -1    0.02    1.80 
   2  -9   1    3.83    5.59 
   2   9   1   -2.42    2.90 
   2  -9   2    8.19    5.02 
  -2   9  -2    5.57    3.55 
  -2   9  -3   -0.28    2.18 
   2  -9   3   -2.50    2.59 
  -2   9  -4    5.72    2.89 
   2  -9   4    4.07    3.23 
   2  -9   5   -3.02    2.64 
  -2   9  -5   -0.45    2.23 
   2  -9   6   12.36    6.68 
  -2   9  -6    0.95    2.01 
  -2   9  -7   -0.81    3.67 
   2  -9   7    2.80    6.91 
   2  -9   8    1.51    5.15 
   2  -9   9    3.22    3.41 
   2  -9  10    7.64    7.20 
   2  -9  11    0.60    3.79 
   2  -9  12    6.69    4.08 
   2  -9  13    8.99   10.79 
   2  10 -12   -3.99    6.71 
  -2 -10  12  -25.72   13.76 
   2  10 -11   -5.99    4.29 
  -2 -10  11   -6.63    5.75 
   2  10 -10   14.80    8.57 
  -2 -10  10   -9.75    7.21 
   2  10  -9    2.37    4.63 
   2  10  -8   -0.60    3.97 
   2  10  -7    7.82    5.47 
   2  10  -6   -1.66    2.63 
   2  10  -5    5.43    5.49 
   2 -10  -4    2.88    2.33 
   2  10  -4    4.13    4.23 
   2 -10  -3   19.24    5.89 
   2  10  -3    1.59    1.75 
   2 -10  -2    4.35    3.97 
   2  10  -2    2.49    2.39 
   2 -10  -1    1.06    4.05 
   2  10  -1   -1.09    2.30 
   2  10   0    0.40    2.74 
   2 -10   0    0.88    5.54 
   2 -10   1    5.89    3.81 
   2  10   1    0.25    3.48 
   2 -10   2    4.10    2.47 
   2  10   2    3.01    2.43 
   2 -10   3    2.36    3.95 
   2 -10   4    6.84    5.77 
   2 -10   5    0.05    3.74 
   2 -10   6   -4.95    6.61 
   2 -10   7   -7.91    3.96 
   2 -10   8  -13.61    9.11 
   2 -10   9  -18.46   12.12 
   2 -10  10   24.47   12.16 
   2 -10  11   -5.73    6.38 
  -2 -11  10   -2.21    5.49 
  -2 -11   9   -7.49   11.80 
  -2 -11   8   14.02    8.48 
   2 -11  -1    1.67    3.20 
   2 -11   0   15.19    8.63 
   2 -11   1    0.93    3.62 
   2 -11   2    2.93    6.25 
   2 -11   3   12.02    7.06 
   2 -11   4   -2.61    3.82 
   2 -11   5    1.16    4.51 
   2 -11   6    0.44    4.48 
   2 -11   7    7.22    4.59 
   2 -11   8   -2.34    5.56 
   2 -11   9  -10.95    8.88 
  -2 -12   7  -11.22   13.48 
  -2 -12   6   -6.94   11.72 
  -2 -12   5   20.40    8.22 
   2 -12   2   -6.41    4.49 
   2 -12   3    6.91    8.66 
   2 -12   4   23.80    9.30 
   2 -12   5   20.77    9.99 
   2 -12   6  -16.57    7.12 
   2 -12   7    9.83   13.09 
  -3   0  22    4.78    4.81 
  -3   0  21   -5.59    4.47 
  -3   0  20    4.41    3.38 
  -3   0  19    0.51    2.23 
  -3   0  18    7.35    3.44 
  -3   0  17   -0.80    2.07 
  -3   0  16   19.66    6.16 
  -3   0  15    2.59    4.02 
  -3   0  14   20.38    7.60 
  -3   0  13   -3.38    3.46 
  -3   0  12    3.91    2.78 
   3   0 -12   11.11    6.53 
   3   0 -11   -2.87    2.93 
  -3   0  11    1.11    1.11 
   3   0 -10   27.56    8.08 
   3   0  -9    1.62    2.14 
   3   0  -8    9.41    3.31 
   3   0  -7   -2.52    2.55 
   3   0  -6   10.82    4.09 
   3   0  -5   -2.65    2.22 
   3   0  -4   67.06    7.36 
   3   0  -3   -1.78    1.65 
  -3   0   2  349.96   14.45 
  -3   0   1   -0.47    1.08 
  -3   0   0  174.46   10.61 
  -3   0  -1    0.85    1.63 
  -3   0  -2  265.49   15.72 
  -3   0  -3    0.39    1.89 
  -3   0  -4   84.16    9.84 
  -3   0  -5    1.27    2.61 
   3   0   5    2.05    2.23 
  -3   0  -6   15.63    4.51 
   3   0   6   16.77    5.28 
  -3   0  -7    1.49    3.40 
   3   0   7   -0.84    1.55 
   3   0   8  173.70   18.30 
  -3   0  -8  182.00   18.16 
   3   0   9   -1.02    3.76 
  -3   0  -9   -2.60    4.55 
   3   0  10   16.11    6.78 
  -3   0 -10   10.65    4.90 
   3   0  10   13.84    5.95 
   3   0  11    2.85    3.18 
   3   0  12   22.58    7.80 
   3   0  13    0.70    4.56 
   3   0  14    6.34    2.91 
   3   0  15    1.31    3.36 
   3   0  16   -4.00    3.46 
   3   0  17    6.67    5.33 
   3   0  18    6.79    7.15 
   3   0  19   -1.87    7.56 
   3   0  20   -0.75    5.10 
   3   0  21   13.80   12.37 
  -3  -1  23   11.24    6.74 
  -3  -1  22   12.81    6.03 
  -3  -1  21   -2.76    4.26 
  -3  -1  20   -2.90    4.67 
  -3   1  20   -0.45    4.19 
  -3  -1  19    1.77    4.49 
  -3   1  19   -0.29    1.76 
  -3   1  18    0.56    2.60 
  -3  -1  18    1.25    3.15 
  -3  -1  17   -2.79    3.83 
  -3   1  17    3.54    3.98 
  -3   1  16    4.02    2.96 
  -3  -1  16    1.41    2.06 
  -3  -1  15   48.26   11.80 
  -3   1  15   64.62   11.83 
  -3  -1  14    2.10    3.26 
  -3   1  14    0.13    1.71 
   3   1 -14    7.91    6.42 
  -3   1  13    1.37    1.56 
   3   1 -13    1.63    1.78 
  -3  -1  13    6.05    5.09 
  -3   1  12    5.03    3.59 
  -3   1  12    7.07    3.53 
   3   1 -12    3.51    3.72 
  -3   1  11   16.60    6.53 
   3   1 -11    7.81    4.21 
  -3   1  11   15.19    4.78 
  -3   1  10    8.64    3.72 
   3   1 -10    7.40    4.19 
   3   1  -9    9.48    4.71 
   3  -1  -9    8.19    4.45 
  -3   1   9    4.33    2.57 
   3  -1  -8   22.92    6.31 
   3   1  -8   27.10    6.91 
   3  -1  -7    2.52    2.65 
   3   1  -7   -1.86    2.26 
   3   1  -6    8.05    3.99 
   3  -1  -6   10.59    3.70 
   3  -1  -5    4.75    2.65 
   3   1  -5   10.48    3.66 
   3   1  -4   56.94    7.62 
   3  -1  -4   57.46    6.30 
  -3   1   3   15.68    2.52 
   3  -1  -3   19.98    3.27 
   3   1  -3   21.91    4.41 
  -3   1   2   66.34    5.28 
   3  -1  -2   60.55    4.65 
  -3   1   1    6.77    2.01 
  -3  -1   1    5.34    2.45 
  -3  -1   0   15.87    3.67 
  -3   1   0   16.34    3.38 
  -3  -1  -1   14.98    3.40 
  -3   1  -1   22.63    4.63 
  -3  -1  -2    8.39    2.77 
  -3   1  -2   10.62    3.65 
  -3  -1  -3  155.92   13.00 
  -3   1  -3  177.56   13.99 
   3   1   3  162.26   12.18 
  -3   1  -4    0.22    1.64 
  -3  -1  -4   -0.12    1.60 
   3   1   4   -1.82    2.69 
  -3  -1  -5    6.89    1.87 
  -3   1  -5   11.25    4.43 
   3   1   5    0.45    2.12 
  -3  -1  -6   60.12    9.57 
   3  -1   6   55.96    8.96 
   3   1   6   56.85    9.04 
  -3   1  -6   60.70    9.84 
   3   1   7   -3.68    3.35 
  -3  -1  -7   -3.11    3.76 
   3  -1   7   -0.43    2.21 
  -3   1  -7    3.05    3.95 
   3  -1   7   -1.77    3.59 
   3   1   8   15.30    5.33 
  -3  -1  -8   24.94    6.68 
   3  -1   8   23.19    6.77 
   3  -1   8   20.95    6.98 
  -3   1  -8   27.23    7.66 
  -3  -1  -9   24.83    6.89 
   3   1   9   20.09    6.44 
   3  -1   9   16.28    6.11 
   3  -1   9   14.50    5.51 
  -3  -1 -10   17.80    4.86 
   3  -1  10   17.40    7.30 
   3  -1  10   13.59    5.71 
   3   1  10   16.22    6.60 
   3   1  11    4.50    1.89 
  -3  -1 -11   -3.86    3.28 
   3  -1  11   -2.86    4.08 
   3  -1  12   21.44    8.61 
   3   1  12   10.59    3.65 
   3  -1  13   -4.16    5.45 
   3   1  13   -4.82    4.76 
   3  -1  14    3.52    3.99 
   3   1  14    3.14    3.07 
   3   1  15    8.09    5.68 
   3  -1  15   -5.83    6.55 
   3  -1  16   -6.35    6.91 
   3   1  16    0.87    5.27 
   3   1  17   -2.91    3.86 
   3  -1  17    4.73    4.60 
   3  -1  18    8.38    7.47 
   3   1  18    8.40    7.32 
   3  -1  19   -0.77    3.50 
   3   1  19   -0.48    6.96 
   3  -1  20   -3.61    7.09 
   3   1  20    1.17    3.54 
   3  -1  21   14.69   10.60 
   3  -1  22   -4.91    4.95 
  -3  -2  23   10.13    7.31 
  -3  -2  22    6.98    5.50 
  -3  -2  21   -7.02    7.06 
  -3  -2  20    7.00    6.69 
  -3   2  19   -0.32    3.35 
  -3  -2  19    0.85    3.29 
  -3   2  18   -0.87    2.54 
  -3  -2  18    1.59    3.32 
  -3  -2  17   10.18    7.36 
  -3   2  17    1.88    3.54 
  -3  -2  16   -0.08    2.46 
  -3   2  16    0.09    2.89 
  -3   2  15    9.21    2.82 
  -3  -2  15    4.67    3.64 
   3   2 -15   13.45    7.11 
  -3  -2  14    3.10    3.78 
   3   2 -14    9.90    5.89 
  -3   2  14    5.93    3.46 
  -3   2  13    3.79    2.71 
   3   2 -13    2.13    2.70 
  -3   2  12   -1.93    3.84 
  -3   2  12    2.25    2.28 
   3   2 -12    4.18    5.28 
  -3   2  11   10.89    3.48 
  -3  -2  11    6.98    1.73 
  -3   2  11   12.13    4.54 
   3   2 -11    8.39    5.61 
   3   2 -10   14.08    6.05 
  -3   2  10   13.93    3.63 
  -3   2  10   18.02    5.51 
  -3   2   9   21.04    3.73 
   3   2  -9   19.59    5.55 
  -3   2   9   31.20    7.64 
  -3   2   8   16.70    3.09 
  -3   2   8   20.13    4.87 
   3   2  -8   16.05    5.64 
  -3   2   7    2.05    2.65 
  -3   2   7    4.05    1.25 
   3   2  -7    5.72    2.94 
  -3   2   6   12.30    3.44 
   3   2  -6   11.66    4.16 
   3   2  -5    7.79    3.00 
  -3   2   5    8.01    2.60 
  -3   2   4   18.63    3.48 
   3  -2  -4   18.91    3.47 
   3   2  -4   21.87    5.27 
   3  -2  -3  191.47    8.24 
   3   2  -3  199.92   13.51 
   3  -2  -3  202.50    7.68 
  -3   2   3  193.09    7.62 
  -3   2   3  180.75    8.35 
   3  -2  -2   52.19    4.69 
  -3   2   2   51.72    4.87 
  -3   2   1   -0.69    1.57 
  -3   2   0    3.10    2.16 
  -3  -2   0    0.88    1.61 
  -3  -2  -1    2.34    1.63 
   3  -2   1    1.29    1.17 
  -3   2  -1    0.07    1.18 
   3   2   1    1.75    1.98 
  -3   2  -2   -0.41    1.48 
   3  -2   2    1.45    1.30 
  -3  -2  -2    1.85    1.41 
   3   2   2    1.48    2.30 
  -3  -2  -3   12.88    3.38 
   3  -2   3    9.48    3.55 
   3   2   3    9.04    3.83 
  -3   2  -3   13.84    4.99 
  -3  -2  -4    3.09    1.40 
   3   2   4    0.16    1.77 
  -3   2  -4    2.55    1.61 
   3  -2   4    6.95    3.21 
   3   2   5    2.91    2.77 
  -3   2  -5    4.04    3.92 
   3  -2   5    4.95    2.92 
  -3  -2  -5    8.75    3.82 
   3   2   6  127.52   12.42 
   3  -2   6  124.46   14.02 
  -3  -2  -6  144.95   13.77 
   3   2   7    3.97    2.86 
  -3  -2  -7   -2.07    2.75 
   3  -2   7    4.70    2.04 
   3  -2   8   12.87    5.98 
  -3  -2  -8    9.59    4.69 
   3  -2   8    7.97    3.87 
   3   2   8    1.27    2.14 
   3  -2   9   23.64    7.91 
   3  -2   9   18.66    7.62 
  -3  -2  -9   18.37    5.53 
   3   2   9   10.69    4.43 
   3  -2  10   -0.77    4.22 
  -3  -2 -10    0.63    3.00 
   3  -2  10    0.16    2.11 
   3   2  10   -5.45    3.97 
   3   2  11   -3.04    2.72 
  -3  -2 -11   -2.70    2.63 
   3   2  12   38.97    9.13 
   3  -2  12   32.50    9.40 
  -3  -2 -12   27.99    9.17 
   3  -2  13    1.44    5.73 
   3   2  13   10.78    5.52 
   3   2  14    0.56    3.05 
   3  -2  14    5.22    5.89 
   3   2  15    3.11    4.64 
   3  -2  15   -3.10    5.91 
   3   2  16    6.26    5.42 
   3  -2  16   13.37    8.65 
   3  -2  17   -7.83    8.03 
   3   2  17   -2.89    5.83 
   3  -2  18   -4.07    7.48 
   3   2  18   -7.46    6.73 
   3  -2  19   -3.41    5.24 
   3   2  19   -3.79    6.92 
   3  -2  20    0.56    3.93 
   3  -2  21   -0.59    5.47 
   3  -2  22    7.87    8.11 
  -3  -3  23   -0.16    6.93 
  -3  -3  22    8.64    8.59 
  -3  -3  21   -2.31    4.16 
  -3  -3  20   -0.55    6.11 
  -3  -3  19    4.30    7.25 
  -3  -3  18    8.62    7.53 
  -3  -3  17    0.66    4.24 
  -3   3  17   -1.59    3.92 
  -3  -3  16    0.09    3.47 
   3   3 -16    0.31    5.38 
  -3   3  16   -2.46    3.68 
   3   3 -15   10.40    6.64 
  -3  -3  15    9.85    6.50 
  -3   3  15   10.13    3.20 
  -3   3  14    0.94    1.54 
   3   3 -14    0.67    3.82 
  -3  -3  14    2.56    2.37 
  -3   3  13    5.33    3.09 
   3   3 -13    2.41    2.23 
   3   3 -12   14.16    6.86 
  -3   3  12   15.27    6.69 
  -3   3  12   17.55    3.77 
  -3   3  11    7.84    5.06 
  -3  -3  11   -6.32    6.69 
   3   3 -11    4.12    3.60 
  -3   3  11    1.37    0.91 
  -3  -3  10    5.44    4.65 
  -3   3  10    1.99    3.06 
  -3   3  10    4.28    1.61 
   3   3 -10    4.61    3.74 
  -3  -3   9   77.53   12.74 
   3   3  -9   65.83   11.97 
  -3   3   9   62.32   10.06 
  -3   3   8   73.73   10.15 
   3   3  -8   75.73   12.27 
  -3  -3   8   68.76   11.61 
  -3   3   7   89.50   10.21 
  -3  -3   7   96.94   12.40 
   3   3  -7   91.60   12.84 
  -3   3   6    1.71    1.55 
  -3  -3   6    6.31    3.15 
   3   3  -6    4.04    3.23 
  -3   3   5   22.19    4.11 
  -3  -3   5   19.43    5.43 
   3   3  -5   23.65    5.45 
  -3   3   4    0.68    1.04 
   3  -3  -4   -1.12    0.70 
   3   3  -4    0.70    1.33 
   3   3  -3   15.45    4.11 
  -3   3   3   17.78    2.34 
   3  -3  -3   18.39    2.76 
   3  -3  -2   47.60    5.39 
   3  -3  -1    7.41    2.83 
   3  -3   0   69.75    8.37 
  -3  -3  -1   56.29    8.03 
   3  -3   1   52.75    4.53 
  -3  -3  -2    0.21    1.79 
   3  -3   2    2.34    1.91 
   3  -3   3    4.54    2.29 
  -3  -3  -3    5.41    1.78 
   3  -3   4   -0.65    1.20 
   3   3   4    1.26    1.61 
  -3  -3  -4    1.47    1.33 
   3   3   5   19.50    5.10 
   3  -3   5   25.30    5.99 
  -3  -3  -5   25.71    5.65 
   3   3   6    8.38    3.97 
  -3  -3  -6    8.50    2.65 
   3  -3   6    8.64    3.43 
   3   3   7   -2.47    2.13 
   3  -3   7    0.23    1.75 
  -3  -3  -7   -1.27    2.53 
   3  -3   8   -2.33    3.15 
  -3  -3  -8    5.83    3.55 
   3   3   8    0.92    1.68 
   3  -3   9   19.73    7.05 
   3   3   9   10.03    4.11 
   3  -3   9    4.19    3.49 
  -3  -3  -9   12.71    4.00 
   3  -3  10    5.26    5.09 
  -3  -3 -10    1.08    2.35 
   3   3  10   -0.65    2.50 
   3  -3  10   -0.44    3.02 
   3  -3  11    5.51    4.34 
   3   3  11    1.40    2.71 
  -3  -3 -11    5.73    4.85 
   3   3  12    6.93    3.76 
   3  -3  12    9.49    5.76 
  -3  -3 -12    3.26    4.35 
   3   3  13   41.15   10.98 
  -3  -3 -13   66.12   12.84 
   3  -3  13   72.29   16.22 
   3   3  14   -2.40    3.94 
   3  -3  14   -6.75    5.73 
   3   3  15    6.53    3.31 
   3  -3  15   20.39    9.75 
   3   3  16   -2.55    3.68 
   3  -3  16    9.96    7.90 
   3  -3  17    3.32    3.54 
   3   3  17    0.45    2.44 
   3  -3  18    2.47    7.23 
   3  -3  19   20.59   10.28 
   3  -3  20  -13.26   11.81 
   3  -3  21   -3.23   10.86 
  -3  -4  22   32.26   14.28 
  -3  -4  21   14.86    9.48 
  -3  -4  20    7.29    9.55 
  -3  -4  19   12.80    8.61 
  -3  -4  18   -1.84    5.14 
   3   4 -17   -8.10    7.29 
  -3  -4  17   -3.23    5.03 
  -3  -4  16    4.45    4.84 
   3   4 -16   -1.59    4.06 
  -3   4  15   17.56    3.03 
  -3  -4  15   21.55   10.26 
   3   4 -15   13.61    7.63 
   3   4 -14    4.81    4.60 
  -3   4  14    9.54    2.20 
   3   4 -13    0.29    2.83 
   3   4 -12   14.18    7.12 
  -3   4  12    5.40    2.36 
   3   4 -11   15.44    7.08 
  -3   4  11   19.11    6.56 
  -3  -4  10   -5.86    4.42 
   3   4 -10   -1.96    2.52 
  -3   4  10   -3.24    3.86 
  -3  -4   9    5.15    3.71 
   3   4  -9    0.18    1.59 
  -3   4   9    0.81    3.10 
   3   4  -8   39.09    9.16 
  -3  -4   8   28.16    6.62 
  -3   4   8   24.68    5.81 
   3   4  -7   19.88    6.97 
  -3   4   7   29.57    6.09 
  -3  -4   7   27.36    7.04 
  -3   4   6   -1.70    2.38 
   3   4  -6   -5.07    3.75 
   3   4  -5    5.01    2.70 
  -3   4   5    3.92    1.95 
   3  -4  -4    1.74    1.10 
   3   4  -4    2.10    2.92 
  -3   4   4    2.32    0.97 
  -3   4   3   22.42    2.84 
   3  -4  -3   25.72    4.00 
   3   4  -3   19.40    5.34 
   3  -4  -2   11.44    2.92 
   3  -4  -1   13.75    3.87 
   3  -4   0  256.61   17.05 
  -3  -4  -1    0.88    1.87 
   3  -4   1   -1.24    2.20 
  -3  -4  -2   12.45    3.90 
   3  -4   2    3.52    4.08 
   3  -4   2    9.13    2.55 
   3  -4   3   38.59    5.67 
  -3  -4  -3   35.15    6.61 
  -3  -4  -4  112.53   11.73 
   3  -4   4   95.57   10.40 
  -3  -4  -5   16.49    4.33 
   3  -4   5   19.84    5.07 
   3   4   6   21.77    5.62 
   3  -4   6   21.15    5.78 
  -3  -4  -6   16.98    4.98 
  -3  -4  -7   -0.79    3.20 
   3   4   7    6.93    3.75 
   3  -4   7    3.62    3.32 
  -3  -4  -8   12.03    4.39 
   3  -4   8   14.03    7.02 
   3  -4   8   12.60    5.19 
   3   4   8    9.20    4.50 
  -3  -4  -9   -1.32    2.59 
   3   4   9    3.30    2.05 
   3  -4   9   -1.99    3.11 
   3  -4   9    1.10    2.95 
   3  -4  10    2.79    3.55 
   3   4  10    2.32    3.18 
  -3  -4 -10   -0.01    3.23 
   3  -4  10   -2.79    4.45 
  -3  -4 -11    2.23    2.55 
   3  -4  11    2.70    2.32 
   3   4  11    3.01    2.94 
   3  -4  12   17.44    8.25 
   3   4  12   17.68    7.02 
  -3  -4 -12   21.93    5.59 
   3  -4  13   10.88    8.29 
  -3  -4 -13    4.25    3.82 
   3   4  13    3.06    2.46 
   3  -4  14    3.18    3.76 
   3   4  14    2.87    2.29 
   3  -4  15   -6.91    8.56 
   3   4  15    6.91    4.34 
   3   4  16   -1.08    4.54 
   3  -4  16   -6.18    7.73 
   3  -4  17   -8.63   10.20 
   3  -4  18   15.88    9.64 
   3  -4  19   -6.61    6.40 
   3  -4  20   25.74    9.44 
  -3  -5  21    5.57    5.84 
  -3  -5  20    8.23    7.20 
  -3  -5  19   -0.94    5.80 
  -3  -5  18   -6.29    5.25 
  -3  -5  17    7.58    7.17 
   3   5 -17    0.76    4.81 
   3   5 -16   14.56    8.00 
  -3  -5  16   -4.83    3.13 
   3   5 -15    9.06    7.87 
  -3  -5  15    5.13    6.40 
   3   5 -14   10.43    4.68 
   3   5 -13    1.83    5.51 
   3   5 -12    3.94    2.94 
  -3   5  12    3.89    3.84 
  -3   5  11   14.44    4.29 
   3   5 -11    7.74    6.03 
   3   5 -10   17.94    7.33 
  -3   5  10   18.92    6.35 
  -3  -5   9   23.73    6.00 
  -3   5   9   29.90    7.22 
   3   5  -9   26.13    7.77 
   3   5  -8   -0.73    1.74 
  -3   5   8   -0.71    1.87 
   3   5  -7   11.78    4.89 
  -3   5   7   13.81    4.28 
   3   5  -6    2.70    3.21 
  -3   5   6    4.25    2.25 
  -3   5   5    5.39    2.40 
   3  -5  -5    8.08    2.20 
   3   5  -5    8.19    4.55 
   3   5  -4   -0.51    2.55 
   3  -5  -4    0.72    1.41 
   3  -5  -3    9.69    2.63 
   3   5  -3   14.45    4.80 
   3  -5  -2   44.90    7.22 
  -3   5   2   51.77    3.74 
   3  -5  -1   -0.31    1.25 
  -3   5   1    1.55    0.81 
   3  -5   0   21.94    5.29 
  -3   5   0   18.84    2.70 
   3  -5   1   -3.64    2.76 
  -3   5  -1    1.30    1.10 
   3  -5   2    2.14    2.81 
  -3   5  -2    2.97    1.48 
  -3  -5  -2    0.50    2.96 
  -3  -5  -3    5.63    2.85 
   3  -5   3   11.59    4.99 
  -3   5  -3    8.22    3.31 
   3  -5   3   10.25    2.88 
   3  -5   4   -1.16    2.36 
   3  -5   4    4.61    2.47 
  -3  -5  -4    0.12    1.37 
  -3  -5  -5   -1.17    1.98 
   3  -5   5    2.02    1.91 
   3  -5   5    1.62    2.70 
   3  -5   6    1.43    2.52 
   3  -5   6    4.04    2.21 
  -3  -5  -6    1.30    1.65 
   3  -5   7    1.21    3.70 
  -3  -5  -7   -2.33    3.64 
   3  -5   7   -4.75    3.85 
   3  -5   8   14.99    6.43 
  -3  -5  -8   26.60    7.61 
   3  -5   8   35.46    9.12 
   3  -5   9   40.71   11.86 
  -3  -5  -9   27.36    6.71 
   3  -5   9   31.89    7.92 
  -3  -5 -10   -3.74    4.92 
   3   5  10    4.17    4.29 
   3  -5  10   -0.88    2.12 
  -3  -5 -11   -3.96    5.40 
   3  -5  11    5.32    6.84 
   3   5  11    1.51    2.83 
   3   5  12    6.26    2.86 
  -3  -5 -12    9.47    5.87 
   3  -5  12   13.75    7.91 
   3   5  13    0.43    3.21 
   3  -5  13  -11.63    7.54 
   3   5  14    8.15    4.77 
   3  -5  14    3.61    4.70 
   3  -5  15   -4.42    3.48 
   3  -5  16    4.55    6.49 
   3  -5  17  -11.05   10.65 
   3  -5  18  -17.30   10.72 
   3  -5  19   -5.77   11.02 
  -3  -6  20    3.92    4.67 
  -3  -6  19    2.70    5.18 
   3   6 -18    4.41    5.38 
  -3  -6  18   -7.51    8.75 
   3   6 -17   -1.75    6.12 
  -3  -6  17   -2.74    5.52 
  -3  -6  16    7.32   10.35 
   3   6 -16    0.05    3.02 
   3   6 -15    6.98    6.91 
  -3  -6  15    3.70    3.35 
   3   6 -14    2.68    4.69 
   3   6 -13    1.50    3.86 
   3   6 -12   -7.64    6.46 
   3   6 -11    4.95    4.51 
  -3   6  11    3.74    2.57 
  -3   6  10    6.19    3.60 
   3   6 -10    6.62    4.73 
   3   6  -9    5.56    4.09 
  -3   6   9    7.68    2.14 
  -3   6   8    6.90    2.85 
   3   6  -8    1.88    3.25 
  -3   6   7    6.58    2.72 
   3   6  -7    5.65    4.01 
   3  -6  -6    1.92    1.44 
  -3   6   6    1.18    1.66 
   3  -6  -6    2.19    1.03 
   3   6  -6    2.33    2.47 
   3   6  -5   -1.30    2.87 
   3  -6  -5    0.31    1.12 
   3  -6  -4   15.90    3.92 
   3   6  -4   12.58    5.17 
   3   6  -3    2.11    2.23 
   3  -6  -3    3.13    2.56 
   3   6  -2   25.18    7.15 
  -3   6   2   29.41    3.23 
   3  -6  -2   27.14    6.09 
   3  -6  -1    6.23    3.19 
  -3   6   1    5.81    1.31 
   3  -6   0   20.58    5.89 
  -3   6   0   24.82    3.45 
  -3   6  -1    0.71    0.70 
   3  -6   1    1.81    1.76 
   3  -6   2   -0.44    3.03 
  -3   6  -2    0.59    1.25 
  -3  -6  -2    5.09    3.14 
   3  -6   3    6.74    4.83 
  -3  -6  -3    3.93    3.35 
  -3   6  -3    7.07    2.77 
  -3   6  -4    2.99    2.29 
   3  -6   4   10.78    5.22 
  -3  -6  -4    5.48    2.82 
   3  -6   5   17.03    7.40 
   3  -6   5   20.00    5.37 
  -3  -6  -5   20.70    7.05 
  -3  -6  -6   31.62    7.24 
   3  -6   6   30.29    9.06 
   3  -6   6   34.82    7.35 
   3  -6   7   43.29    8.22 
   3  -6   7   23.12    8.75 
  -3  -6  -7   29.52    6.35 
   3  -6   8   13.65    5.91 
   3  -6   8    7.43    5.19 
  -3  -6  -8    6.14    3.32 
   3  -6   9   10.13    5.58 
  -3  -6  -9    7.02    4.56 
  -3  -6 -10    2.75    1.45 
   3  -6  10    2.77    5.28 
   3  -6  11    3.39    4.71 
   3  -6  12    0.34    3.42 
   3  -6  13    9.27    4.48 
   3  -6  14   -5.84    8.39 
   3  -6  15   -8.13    7.63 
   3  -6  16   10.91   10.02 
   3  -6  17   -1.27    5.15 
  -3  -7  18   -3.99    5.26 
   3   7 -18    1.88    5.77 
   3   7 -17    2.55    3.88 
  -3  -7  17   13.78    6.66 
  -3  -7  16   -2.00    4.93 
   3   7 -16   -0.94    3.03 
   3   7 -15    6.52    5.14 
  -3  -7  15   -3.53    5.06 
   3   7 -14    2.01    4.52 
   3   7 -13    4.97    5.53 
   3   7 -12   13.61    6.69 
  -3   7  11    2.47    4.49 
   3   7 -11    7.68    6.26 
   3   7 -10   -2.14    3.94 
  -3   7  10    3.15    2.96 
   3   7  -9    9.55    4.94 
  -3   7   9   15.27    5.24 
  -3   7   8    5.67    2.89 
   3   7  -8    0.56    3.38 
   3  -7  -7    3.76    0.74 
   3   7  -7    6.19    5.11 
  -3   7   7    7.49    3.49 
   3  -7  -7    5.13    1.54 
   3  -7  -6   74.45    7.34 
   3  -7  -6   79.71    7.57 
  -3   7   6   75.40    8.82 
   3   7  -6   60.35   11.74 
   3  -7  -5   15.02    3.82 
   3   7  -5   10.90    5.18 
   3   7  -4    1.66    1.94 
   3  -7  -4    2.48    1.58 
   3  -7  -3   11.48    4.81 
  -3   7   3   12.97    2.85 
   3   7  -3   10.83    4.50 
   3   7  -2   -3.26    4.05 
   3  -7  -2    3.52    3.65 
  -3   7   2   -0.09    0.67 
   3  -7  -1   11.57    4.97 
  -3   7   1   11.73    2.40 
   3  -7   0    4.50    3.09 
  -3   7   0    3.04    1.17 
  -3   7  -1    0.61    0.79 
   3  -7   1   -0.14    3.11 
  -3   7  -2   43.06    6.23 
   3  -7   2   44.72   10.81 
  -3  -7  -2   46.47    9.86 
  -3  -7  -3   21.38    6.31 
  -3   7  -3   13.34    4.02 
   3  -7   3   16.56    6.72 
  -3  -7  -4   20.23    5.33 
  -3   7  -4   24.08    5.83 
   3  -7   4   19.06    7.22 
   3  -7   5   23.55    8.99 
  -3  -7  -5   26.13    7.48 
   3  -7   6   17.66    8.26 
  -3  -7  -6    6.54    3.57 
   3  -7   7    3.68    2.81 
   3  -7   7    5.70    3.95 
  -3  -7  -7   12.83    5.66 
   3  -7   8   53.64   10.81 
   3  -7   8   59.98   14.76 
  -3  -7  -8   47.85    8.97 
   3  -7   9    1.94    4.26 
   3  -7  10   11.94    6.96 
   3  -7  11   13.97    8.66 
   3  -7  12    0.68    3.59 
   3  -7  13    4.61    4.97 
   3  -7  14    1.92    3.94 
   3  -7  15    9.73    6.96 
   3  -7  16    4.83    9.91 
   3   8 -17    3.78    5.88 
   3   8 -16    0.28    5.86 
  -3  -8  16   18.48   12.10 
  -3  -8  15   -0.41    6.24 
   3   8 -15    4.12    5.57 
   3   8 -14    1.83    7.05 
  -3  -8  14    9.93    7.94 
   3   8 -13    4.19    3.27 
   3   8 -12   -1.62    6.65 
   3   8 -11   -5.51    2.47 
   3   8 -10    3.75    2.85 
   3   8  -9    5.79    5.92 
  -3   8   9    5.66    4.66 
   3   8  -8   38.77   11.58 
  -3   8   8   45.11    8.16 
  -3   8   7   -3.12    3.98 
   3  -8  -7   -0.12    1.85 
   3  -8  -7   -0.47    1.37 
   3   8  -7    4.85    5.61 
  -3   8   6   50.69    6.84 
   3  -8  -6   50.62    7.40 
   3  -8  -6   64.57    7.99 
   3   8  -6   48.03   11.14 
   3   8  -5    4.56    4.38 
   3  -8  -5    3.80    2.29 
   3  -8  -4    6.67    3.56 
   3   8  -4   10.00    5.27 
  -3   8   4   10.47    2.74 
  -3   8   3   63.21    5.95 
   3  -8  -3   67.66   10.80 
   3   8  -3   53.83   10.90 
  -3   8   2    3.10    1.39 
   3  -8  -2    3.94    2.30 
   3   8  -2    3.14    2.79 
   3   8  -1    7.18    4.58 
   3  -8  -1    6.05    3.27 
  -3   8   1   11.08    2.28 
  -3   8   0   -1.20    0.84 
   3  -8   0   -1.42    3.34 
   3  -8   1   -1.74    4.88 
  -3   8  -1    1.72    1.64 
  -3  -8  -2   17.90    7.60 
   3  -8   2   16.16    7.18 
  -3   8  -2   12.78    3.58 
   3  -8   3    4.29    4.54 
  -3   8  -3    2.96    1.88 
  -3  -8  -3    5.97    4.59 
   3  -8   4   12.07    7.06 
  -3  -8  -4    6.40    2.48 
   3  -8   5    0.42    3.67 
  -3  -8  -5    4.31    4.29 
   3  -8   6   10.08    7.69 
  -3  -8  -6    1.21    1.88 
   3  -8   7    4.15    3.53 
   3  -8   8    3.68    5.36 
   3  -8   9   12.26    8.67 
   3  -8  10    7.06    2.97 
   3  -8  11    8.04    9.09 
   3  -8  12   -9.34    8.67 
   3  -8  13    4.44    6.28 
   3  -8  14  -18.98   11.24 
   3   9 -17   -8.06    7.96 
   3   9 -16    5.83    4.09 
  -3  -9  15   10.71    9.04 
   3   9 -15    7.90    7.46 
  -3  -9  14   -2.37    6.46 
   3   9 -14   12.42   10.12 
   3   9 -13    0.51    6.47 
  -3  -9  13    7.47    5.09 
   3   9 -12    5.36    3.56 
   3   9 -11   -8.70    6.59 
   3   9 -10   -4.25    5.59 
   3   9  -9   -0.30    3.20 
   3   9  -8   10.81    6.39 
   3   9  -7   -5.37    5.95 
   3   9  -6   12.35    7.64 
   3  -9  -6   10.08    2.54 
  -3   9   5    1.42    1.52 
   3  -9  -5    0.27    2.15 
   3   9  -5    3.86    3.18 
   3  -9  -4    7.60    3.33 
  -3   9   4    9.28    1.87 
   3   9  -4    3.50    3.53 
   3  -9  -3    1.80    3.25 
  -3   9   3    3.39    1.16 
   3   9  -3    0.19    3.38 
   3   9  -2   -2.42    3.63 
  -3   9   2    1.66    0.77 
   3  -9  -2   -0.43    1.97 
   3  -9  -1   -0.12    3.17 
  -3   9   1    0.81    0.55 
   3   9  -1   -2.85    3.04 
  -3   9   0    7.36    1.55 
   3   9   0    7.12    4.92 
   3  -9   0   15.17    6.35 
   3  -9   1   -2.60    3.46 
   3  -9   2    4.68    2.41 
   3  -9   3   39.96   11.49 
   3  -9   4    4.97    3.94 
   3  -9   5    6.45    6.50 
   3  -9   6   -5.38    8.00 
   3  -9   7    1.19    5.96 
   3  -9   8   12.45    6.76 
   3  -9   9   -9.17    6.79 
   3  -9  10   -7.23    6.46 
   3  -9  11   18.33    8.74 
   3  -9  12   -4.82    4.18 
   3  -9  13   -3.68    6.82 
   3  10 -14   -4.78    5.71 
   3  10 -13   -9.76    6.87 
  -3 -10  12    7.47    7.47 
   3  10 -12   14.16   10.96 
   3  10 -11  -11.25    9.33 
   3  10 -10   10.88    9.07 
   3  10  -9   -0.78    2.99 
   3  10  -8   -1.24    3.96 
   3  10  -7   -5.34    7.03 
   3  10  -6    9.70    4.52 
   3  10  -5    2.41    2.08 
   3 -10  -4    0.66    4.05 
   3  10  -4    3.85    4.59 
   3  10  -3    1.96    4.35 
   3 -10  -3    7.12    4.92 
   3 -10  -2    3.26    3.20 
   3  10  -2   -5.30    2.63 
   3 -10  -1    5.15    5.28 
   3  10  -1   -4.39    5.63 
   3  10   0   -5.29    6.42 
   3 -10   0   -1.84    3.92 
   3  10   1   11.29    6.91 
   3 -10   1   21.90    8.24 
   3 -10   2   -8.58    7.07 
   3 -10   3    7.54    7.48 
   3 -10   4    4.19    5.95 
   3 -10   5    6.71    6.58 
   3 -10   6   19.71    5.66 
   3 -10   7    4.50    3.43 
   3 -10   8    9.46    6.63 
   3 -10   9    8.41    6.29 
   3 -10  10    4.81    8.44 
   3 -10  11   -5.61    7.64 
  -3 -11  10    6.46    4.42 
   3 -11  -1    7.62    7.87 
   3 -11   0   -8.27    9.56 
   3 -11   1    5.86    2.92 
   3 -11   2   -3.10    5.60 
   3 -11   3   14.22    9.18 
   3 -11   4    3.83    5.02 
   3 -11   5   12.03    8.46 
   3 -11   6    4.64    8.53 
   3 -11   7    7.46    7.73 
   3 -11   8   22.43   13.08 
   3 -11   9    4.17    9.01 
   3 -12   2  -12.01   12.23 
   3 -12   3   15.46    5.79 
   3 -12   4   -0.48    8.16 
   3 -12   5   20.53   14.24 
   3 -12   6  -20.52   13.31 
  -4   0  22   12.37   10.16 
  -4   0  21    4.59    5.79 
  -4   0  20    8.18    7.11 
  -4   0  19   -5.93    4.89 
  -4   0  18   -2.29    3.55 
  -4   0  17    5.70    2.90 
  -4   0  16   68.34   12.64 
  -4   0  15   -0.16    1.56 
   4   0 -14   11.16    6.34 
  -4   0  14   11.79    5.61 
  -4   0  13   -2.10    3.33 
   4   0 -13   -0.06    1.83 
  -4   0  12    1.62    3.66 
   4   0 -12   -1.46    2.50 
   4   0 -11   -0.43    2.82 
   4   0 -10   62.62   11.12 
   4   0  -9    1.48    2.81 
   4   0  -8    0.06    2.22 
   4   0  -7    3.15    2.71 
   4   0  -6   33.49    6.40 
   4   0  -5   -0.85    1.93 
   4   0  -4   22.29    4.60 
   4   0  -3   -0.17    1.50 
  -4   0   3   -1.03    1.62 
  -4   0   2   48.60    6.29 
  -4   0   1    2.32    1.84 
  -4   0   0   28.20    5.39 
  -4   0  -1   -0.31    2.08 
  -4   0  -2  179.37   14.25 
  -4   0  -3    3.82    3.22 
  -4   0  -4  238.99   18.16 
  -4   0  -5    0.76    1.71 
   4   0   5    2.46    2.58 
  -4   0  -6   -0.95    2.10 
   4   0   6   -1.14    3.03 
  -4   0  -7    0.09    3.40 
   4   0   7    1.31    1.70 
  -4   0  -8   30.92    8.12 
   4   0   8   28.13    7.77 
   4   0   9   -0.75    3.27 
  -4   0  -9   -0.04    2.61 
   4   0  10  100.79   15.86 
  -4   0 -10  100.33   15.25 
  -4   0 -11   -0.50    2.21 
   4   0  11   -0.31    3.43 
   4   0  12   55.30   12.76 
   4   0  13    5.62    3.49 
   4   0  14    6.43    4.21 
   4   0  15   -8.00    5.49 
   4   0  16    1.57    4.08 
   4   0  17   15.04    8.27 
   4   0  18   -2.98    5.96 
   4   0  19   -0.40    7.63 
   4   0  20    2.79    7.98 
   4   0  21   -9.38    4.54 
  -4  -1  23    0.59    3.85 
  -4  -1  22   -3.60    7.13 
  -4  -1  21   -0.20    3.47 
  -4  -1  20   -5.07    5.58 
  -4   1  20   -1.56    4.49 
  -4  -1  19   -3.05    2.27 
  -4   1  19   -2.14    2.32 
  -4  -1  18    5.50    4.43 
  -4   1  18    3.78    4.80 
  -4   1  17    7.65    1.94 
  -4  -1  17   15.49    7.57 
  -4  -1  16    2.10    3.78 
  -4   1  16    1.14    2.42 
  -4  -1  15   38.47   10.43 
   4   1 -15   35.92   11.17 
  -4   1  15   40.74    8.62 
  -4   1  14    1.87    1.60 
  -4  -1  14    8.54    5.33 
   4   1 -14    7.30    6.18 
   4   1 -13    1.37    2.64 
  -4   1  13    5.84    4.10 
   4  -1 -12    4.87    4.33 
  -4   1  12    3.07    3.33 
  -4   1  12    2.34    2.92 
   4   1 -12    0.18    2.18 
   4   1 -11   -3.32    3.61 
  -4   1  11    3.37    2.47 
  -4   1  11    3.30    1.70 
   4  -1 -11    5.94    4.86 
   4   1 -10    2.65    2.84 
  -4   1  10    2.81    3.57 
   4  -1 -10    6.34    3.42 
   4  -1  -9   94.13   12.60 
   4   1  -9   92.90   13.35 
  -4   1   9  109.15   13.89 
  -4   1   8   56.26    9.16 
   4   1  -8   33.60    8.27 
   4  -1  -8   38.10    7.69 
   4  -1  -7   -1.10    1.92 
   4   1  -7    1.44    3.11 
  -4   1   7   -3.17    2.26 
  -4   1   6   39.11    6.88 
   4  -1  -6   31.55    5.75 
   4   1  -6   32.65    6.59 
  -4   1   5   59.21    7.37 
   4   1  -5   75.92    9.27 
  -4   1   5   61.57    6.27 
   4  -1  -5   59.76    7.15 
  -4   1   4    5.71    2.72 
   4   1  -4    3.58    3.07 
  -4   1   4    4.94    1.81 
   4  -1  -4    7.04    2.64 
  -4   1   3   10.19    2.30 
   4   1  -3   15.02    3.84 
   4  -1  -3   18.76    3.62 
  -4  -1   2  729.99   26.13 
  -4   1   2  726.35   21.58 
  -4   1   1 2228.58   41.06 
  -4  -1   1 2239.71   44.76 
  -4  -1   0    9.57    3.58 
  -4   1   0    3.08    2.00 
  -4  -1  -1    0.66    1.33 
  -4   1  -1    2.78    2.18 
  -4  -1  -2  244.83   16.20 
  -4   1  -2  267.24   17.74 
   4   1   3   -0.21    1.53 
  -4   1  -3    0.58    1.74 
  -4  -1  -3   -1.63    1.54 
  -4   1  -4    9.71    4.24 
  -4  -1  -4   11.49    5.01 
   4   1   4    5.47    2.75 
  -4   1  -5    3.50    1.72 
  -4  -1  -5   -1.22    2.12 
   4   1   5    0.82    1.77 
  -4   1  -6   60.34   10.47 
   4   1   6   46.75    9.20 
  -4  -1  -6   52.53    9.09 
  -4  -1  -7    9.69    4.40 
  -4   1  -7    5.47    3.26 
   4   1   7    3.92    3.38 
   4  -1   7    4.39    2.66 
   4  -1   8    1.42    3.72 
  -4  -1  -8    4.35    2.09 
  -4   1  -8    5.91    4.54 
   4  -1   8    7.92    4.87 
   4   1   8    7.61    4.84 
  -4   1  -9    0.58    4.48 
   4  -1   9    5.58    4.14 
  -4  -1  -9    1.52    1.73 
   4  -1   9    6.27    4.24 
   4   1   9   10.38    5.37 
  -4  -1 -10   -0.14    3.42 
  -4   1 -10    6.00    5.77 
   4  -1  10    2.64    2.15 
   4   1  10    4.25    4.07 
  -4  -1 -11   -1.46    5.92 
   4  -1  11   -2.69    3.22 
   4   1  11    1.50    2.90 
  -4  -1 -12   23.62    7.60 
   4  -1  12   14.46    7.55 
   4   1  12   19.31    7.49 
   4  -1  13   42.32   12.78 
   4   1  13   42.39   11.01 
   4  -1  14   11.16    6.91 
   4   1  14   14.74    7.20 
   4   1  15    1.12    2.74 
   4  -1  15   -5.57    6.90 
   4  -1  16   16.22    7.68 
   4   1  16   -0.13    4.30 
   4   1  17   -4.90    3.19 
   4  -1  17   -0.24    3.68 
   4   1  18    3.76    6.74 
   4  -1  18   -2.64    3.35 
   4  -1  19   -5.01    6.95 
   4   1  19    5.91    7.96 
   4  -1  20    3.57    8.48 
   4   1  20   -0.53    3.92 
   4  -1  21  -10.45   13.36 
  -4  -2  24  -17.13   11.11 
  -4  -2  23   -3.33    7.56 
  -4  -2  22   12.09    3.18 
  -4  -2  21    9.72    7.89 
  -4  -2  20   -2.72    7.35 
  -4   2  19   -0.78    1.93 
  -4  -2  19   -7.74    5.51 
  -4   2  18   -3.26    2.67 
  -4  -2  18   -0.60    6.80 
  -4   2  17   -0.12    1.56 
  -4  -2  17   -7.21    4.52 
   4   2 -17   -8.50    4.59 
   4   2 -16    8.33    5.97 
  -4  -2  16   11.89    7.04 
  -4   2  16   12.09    6.09 
  -4  -2  15    3.91    4.26 
  -4   2  15    8.36    4.42 
   4   2 -15    4.64    5.23 
  -4   2  14   18.12    5.50 
   4   2 -14   13.32    7.91 
   4   2 -13    1.51    4.64 
  -4   2  13    3.38    2.51 
   4   2 -12    2.70    2.11 
  -4   2  12    3.57    2.30 
  -4   2  12   11.43    5.92 
   4   2 -11    3.13    3.06 
  -4   2  11   -2.27    2.49 
  -4   2  11    1.46    1.45 
  -4   2  10    2.11    2.21 
   4   2 -10    0.98    2.60 
  -4   2  10    0.23    1.47 
  -4   2   9    4.42    1.73 
   4   2  -9    6.10    4.07 
  -4   2   9    6.09    2.21 
   4   2  -8   85.80   12.55 
   4  -2  -8   71.10    9.83 
  -4   2   8   80.46   10.53 
   4   2  -7    5.42    4.17 
  -4   2   7    4.88    2.56 
   4  -2  -7    0.79    1.61 
  -4   2   6    4.42    1.47 
   4   2  -6    0.44    2.23 
  -4   2   6   -0.10    2.00 
   4  -2  -6    1.18    1.98 
   4   2  -5   21.98    5.49 
  -4   2   5   28.64    2.95 
  -4   2   5   23.67    4.49 
   4  -2  -5   24.61    4.30 
   4  -2  -4    1.23    1.11 
  -4   2   4    5.81    1.91 
   4   2  -4    3.56    1.95 
   4  -2  -4    2.72    1.48 
  -4   2   4    2.84    1.86 
  -4   2   3   -0.88    1.03 
   4  -2  -3    0.38    1.00 
  -4   2   3   -0.79    1.37 
  -4   2   2    6.60    2.37 
   4  -2  -2    4.02    1.92 
   4  -2  -2    5.95    1.31 
  -4   2   1  131.79   10.00 
  -4  -2   1  136.87   12.53 
  -4   2   0   38.42    6.18 
  -4  -2   0   43.22    7.06 
   4   2   1   66.82    8.90 
  -4  -2  -1   61.95    8.44 
  -4   2  -1   64.59    8.60 
   4   2   2    4.55    3.50 
  -4   2  -2    2.16    2.14 
  -4  -2  -2    5.13    2.71 
  -4  -2  -3   85.67   10.24 
  -4   2  -3   82.25   10.99 
   4   2   3   78.67    9.66 
   4   2   4    2.24    2.71 
  -4   2  -4   -2.25    3.71 
   4  -2   4   -0.75    1.45 
  -4  -2  -4    2.96    3.06 
  -4  -2  -5   21.97    5.94 
  -4   2  -5   14.08    4.27 
   4  -2   5   18.67    5.41 
   4   2   5   14.13    4.83 
  -4  -2  -6   61.57   10.04 
   4  -2   6   59.32    9.98 
  -4   2  -6   52.58   10.12 
   4   2   6   51.46    8.96 
  -4  -2  -7    0.13    1.49 
   4   2   7    2.08    2.61 
   4  -2   7    1.50    2.41 
  -4   2  -7   -0.36    3.39 
   4   2   8   11.15    4.89 
   4  -2   8   10.60    5.18 
  -4  -2  -8   10.86    4.12 
   4  -2   8   11.11    5.49 
   4  -2   9   13.86    6.07 
  -4  -2  -9    8.15    3.96 
   4  -2   9   11.29    5.09 
   4   2   9    6.90    3.59 
   4   2  10    3.99    4.27 
  -4  -2 -10    6.76    2.83 
   4  -2  10    2.62    3.35 
   4  -2  11   11.68    5.54 
  -4  -2 -11   14.91    7.07 
   4   2  11    6.33    4.02 
   4  -2  12    0.66    4.02 
  -4  -2 -12   -2.36    2.59 
   4   2  12    2.97    3.24 
   4   2  13   -0.09    2.84 
   4  -2  13    8.11    5.87 
   4  -2  14   -4.90    7.52 
   4   2  14   -1.55    5.53 
   4  -2  15    9.22    7.86 
   4   2  15    0.65    2.32 
   4  -2  16   16.60    9.16 
   4   2  16   -1.09    3.85 
   4   2  17   -5.53    6.15 
   4  -2  17  -13.18    9.08 
   4  -2  18    3.62    3.38 
   4   2  18    7.93    7.23 
   4   2  19   -2.49    6.03 
   4  -2  19   -2.17    3.29 
   4  -2  20   -3.07    9.05 
   4  -2  21   17.02    7.39 
  -4  -3  23   -4.58    7.63 
  -4  -3  22   -6.34    8.40 
  -4  -3  21    1.02    3.96 
  -4  -3  20   -7.18    7.08 
  -4  -3  19    7.12    7.22 
   4   3 -18    0.69    3.17 
  -4  -3  18   -0.10    3.31 
  -4  -3  17    0.89    6.27 
   4   3 -17   -0.21    5.17 
  -4   3  17    4.19    4.45 
  -4  -3  16    9.88    6.86 
  -4   3  16   14.27    4.37 
   4   3 -16   17.69    8.98 
  -4   3  15    4.32    1.33 
   4   3 -15    7.16    4.91 
  -4   3  14   12.83    3.66 
   4   3 -14   -1.26    2.77 
   4   3 -13    5.08    4.61 
  -4   3  13    0.46    1.81 
   4   3 -12    7.17    5.02 
  -4   3  12   13.68    5.77 
  -4   3  12    5.80    2.16 
   4   3 -11    6.23    4.87 
  -4   3  11    6.43    1.94 
  -4   3  11    6.37    1.79 
  -4  -3  11   11.04    7.30 
  -4   3  10   -3.48    4.20 
   4   3 -10   -2.05    4.92 
  -4  -3  10    5.66    4.28 
  -4  -3   9   14.05    4.59 
  -4   3   9    8.35    3.52 
   4   3  -9   15.17    6.24 
  -4   3   8    8.29    2.99 
  -4  -3   8   15.61    6.59 
   4   3  -8   16.96    6.13 
  -4  -3   7   16.10    6.41 
   4   3  -7    9.50    4.57 
  -4   3   7    6.65    3.24 
   4   3  -6    2.36    2.11 
  -4  -3   6    0.68    2.20 
  -4   3   6    0.37    2.05 
  -4   3   5    8.25    2.22 
   4   3  -5   13.54    4.39 
   4   3  -4    0.43    1.68 
  -4   3   4    0.36    1.20 
   4  -3  -4    0.10    1.02 
   4  -3  -3    1.72    1.74 
  -4   3   3   -0.17    0.86 
  -4   3   2   93.61    8.48 
   4  -3  -2  100.75    8.86 
   4  -3  -1    3.28    2.77 
  -4   3   1    1.40    1.34 
   4  -3   0   -1.66    2.20 
  -4   3   0    3.96    2.84 
   4  -3   1    1.84    0.91 
  -4  -3  -1    3.92    3.44 
  -4   3  -1    3.69    1.65 
  -4   3  -2   -0.65    2.57 
  -4  -3  -2    0.67    1.79 
   4  -3   2    0.86    1.64 
   4  -3   3   34.91    5.75 
  -4  -3  -3   40.33    7.20 
  -4   3  -3   39.49    8.09 
   4   3   3   34.28    6.88 
  -4  -3  -4    0.74    2.48 
   4  -3   4    2.20    1.22 
   4   3   4    3.11    1.94 
   4   3   5   13.71    4.10 
  -4  -3  -5    9.85    2.78 
   4  -3   5    9.20    4.34 
   4  -3   6   15.91    5.19 
   4   3   6    9.88    3.97 
  -4  -3  -6   10.52    4.26 
   4  -3   7   11.79    4.96 
   4   3   7    9.47    4.32 
  -4  -3  -7   15.36    4.92 
   4   3   8    2.94    3.25 
  -4  -3  -8    1.43    1.60 
   4  -3   8    8.30    5.38 
   4  -3   8   -1.61    4.38 
  -4  -3  -9    3.30    1.53 
   4   3   9    2.28    1.92 
   4  -3   9    3.57    4.49 
   4  -3   9    3.52    4.26 
   4   3  10   -2.47    2.52 
   4  -3  10    4.55    5.72 
  -4  -3 -10    5.71    4.31 
   4   3  11   10.41    5.16 
  -4  -3 -11   12.35    6.83 
   4  -3  11   11.01    5.78 
   4  -3  12   17.52    7.98 
   4   3  12   24.74    8.25 
  -4  -3 -12   12.04    4.66 
   4   3  13    0.49    3.45 
  -4  -3 -13    6.70    5.90 
   4  -3  13    3.43    5.30 
   4   3  14    6.75    4.54 
   4  -3  14   13.08    6.50 
   4   3  15    5.17    5.30 
   4  -3  15    9.88    6.90 
   4   3  16    4.62    5.54 
   4  -3  16   -3.38    6.99 
   4  -3  17    3.49    2.86 
   4   3  17    7.66    5.45 
   4  -3  18    6.88    9.46 
   4  -3  19    8.78   10.31 
   4  -3  20   -4.18    6.24 
  -4  -4  23   -0.72   10.22 
  -4  -4  22   -4.83    5.17 
  -4  -4  21  -12.34   10.23 
  -4  -4  20   21.80    9.60 
  -4  -4  19    1.19    4.73 
   4   4 -18   10.85    7.74 
  -4  -4  18    9.51    7.38 
  -4  -4  17   -0.26    3.33 
   4   4 -17    9.61    7.18 
   4   4 -16    3.49    5.68 
  -4  -4  16    0.03    4.57 
   4   4 -15    9.50    7.39 
   4   4 -14   -5.33    5.46 
   4   4 -13   13.55    6.06 
   4   4 -12   -7.02    4.72 
  -4   4  12    1.19    2.97 
  -4   4  11    6.12    2.86 
   4   4 -11   10.28    5.77 
  -4   4  10    2.08    1.72 
  -4  -4  10    3.97    5.01 
   4   4 -10    4.00    4.90 
  -4  -4   9    1.67    3.25 
  -4   4   9   -0.06    2.42 
   4   4  -9    0.35    1.84 
  -4   4   8    4.43    3.07 
  -4  -4   8   -1.56    2.45 
   4   4  -8    2.27    1.77 
  -4   4   7   23.74    4.85 
   4   4  -7   16.23    5.53 
   4   4  -6   11.11    5.58 
  -4   4   6    8.63    2.44 
  -4   4   5    3.42    1.93 
   4  -4  -5    3.27    1.01 
   4   4  -5    0.61    1.58 
   4   4  -4   59.27    9.44 
   4  -4  -4   64.22    6.02 
  -4   4   4   55.67    4.76 
   4  -4  -3   73.69    7.54 
   4  -4  -2   33.00    5.62 
   4  -4  -1   77.00    9.21 
   4  -4   0   -0.96    2.52 
   4  -4   1    0.91    1.16 
   4  -4   1    1.86    1.93 
  -4  -4  -1   -1.70    3.48 
   4  -4   2   42.04    8.49 
  -4  -4  -2   47.94    8.40 
   4  -4   2   45.60    5.55 
   4  -4   3   -1.02    1.90 
  -4  -4  -3   -3.62    2.78 
  -4  -4  -4   -1.72    2.70 
   4  -4   4    4.07    2.93 
  -4  -4  -5    7.07    4.43 
   4  -4   5   12.41    4.45 
   4   4   6    3.78    3.01 
   4  -4   6    5.11    4.11 
  -4  -4  -6    4.49    2.60 
   4  -4   7    0.21    2.29 
   4   4   7    2.28    2.46 
   4  -4   7    5.80    4.70 
  -4  -4  -7   -0.08    2.53 
   4   4   8   18.98    6.38 
   4  -4   8   21.38    6.75 
   4  -4   8   17.66    7.04 
  -4  -4  -8   18.61    5.61 
  -4  -4  -9    9.48    5.54 
   4  -4   9    5.68    4.49 
   4   4   9   13.25    5.64 
   4  -4   9   11.70    5.28 
   4   4  10    1.01    3.32 
   4  -4  10   -1.76    3.15 
  -4  -4 -10   -0.11    2.05 
   4   4  11   12.49    6.01 
   4  -4  11   11.30    6.10 
  -4  -4 -11   14.80    4.68 
  -4  -4 -12    0.54    5.24 
   4   4  12   -2.03    2.58 
   4  -4  12    1.62    2.60 
   4  -4  13    6.52    6.50 
   4   4  13   -2.29    2.20 
  -4  -4 -13   -3.90    3.79 
   4   4  14    1.06    4.16 
   4  -4  14    0.68    4.20 
   4   4  15   -4.23    4.35 
   4  -4  15   14.59    7.48 
   4   4  16    1.02    3.01 
   4  -4  16   13.64    5.33 
   4  -4  17   18.68    8.05 
   4  -4  18   -8.45    7.97 
   4  -4  19   -3.03    6.63 
  -4  -5  21    7.26    9.49 
  -4  -5  20  -17.39    9.34 
  -4  -5  19   -8.12    7.60 
   4   5 -19   -1.76    5.77 
  -4  -5  18  -13.02    8.02 
   4   5 -18    4.54    6.47 
  -4  -5  17    2.48    3.53 
   4   5 -17   11.97    8.73 
  -4  -5  16    6.26    7.06 
   4   5 -16    6.66    3.91 
   4   5 -15    3.71    4.27 
   4   5 -14    5.57    4.53 
   4   5 -13   -3.33    3.59 
  -4   5  12   56.13   11.53 
   4   5 -12   31.60   10.16 
  -4   5  11   -5.57    3.01 
   4   5 -11    1.89    3.59 
   4   5 -10   25.55    8.81 
  -4   5  10   32.72    7.54 
  -4   5   9    1.83    1.53 
  -4  -5   9    5.34    4.58 
   4   5  -9    4.07    3.25 
  -4   5   8    8.29    3.43 
   4   5  -8    2.86    3.62 
   4   5  -7    2.00    3.41 
  -4   5   7    1.83    1.46 
  -4   5   6   13.36    3.17 
   4   5  -6   20.00    6.61 
   4  -5  -5    0.00    1.08 
  -4   5   5   -0.88    1.81 
   4   5  -5   -2.64    3.01 
   4  -5  -4    3.23    1.16 
   4   5  -4    0.69    1.69 
  -4   5   4    3.62    1.36 
   4   5  -3   11.07    5.05 
   4  -5  -3    8.70    2.34 
   4  -5  -2    3.50    1.18 
   4  -5  -1   -2.59    2.70 
   4  -5   0   28.01    6.14 
   4  -5   1   10.36    3.53 
  -4  -5  -1   10.67    3.16 
   4  -5   2    6.98    4.24 
  -4  -5  -2    5.67    3.05 
   4  -5   2    5.99    1.99 
   4  -5   3   -1.30    1.49 
   4  -5   3    3.79    3.92 
  -4  -5  -3   -3.10    3.04 
  -4  -5  -4   16.15    5.44 
   4  -5   4   10.62    3.27 
   4  -5   4    4.83    2.78 
  -4  -5  -5    9.23    3.19 
   4  -5   5   12.74    4.38 
   4  -5   5    7.52    4.17 
   4  -5   6   27.44    9.32 
  -4  -5  -6   21.92    7.07 
   4  -5   6   32.89    6.69 
   4  -5   7   16.80    5.05 
   4  -5   7   14.37    7.60 
  -4  -5  -7   23.09    6.08 
  -4  -5  -8    0.31    2.06 
   4  -5   8    6.44    4.83 
   4  -5   8    0.78    3.87 
  -4  -5  -9   27.54    8.38 
   4  -5   9   23.17    9.24 
   4  -5   9   30.93    7.89 
   4  -5  10    9.48    6.57 
   4   5  10   11.26    5.22 
  -4  -5 -10    4.35    2.99 
  -4  -5 -11    9.23    5.16 
   4   5  11    7.37    3.41 
   4  -5  11    6.30    6.05 
   4  -5  12   -4.49    5.95 
   4   5  12    0.72    1.68 
  -4  -5 -12   -1.06    4.53 
   4  -5  13    1.78    7.35 
   4   5  13   -2.48    5.23 
   4   5  14   -0.80    2.73 
   4  -5  14    1.39    5.74 
   4  -5  15   11.09    9.38 
   4  -5  16   -0.11    4.00 
   4  -5  17    1.42    5.22 
   4  -5  18   -2.41    9.42 
  -4  -6  20   -5.58    6.92 
   4   6 -19   -9.14    7.62 
  -4  -6  19    3.69    5.47 
   4   6 -18   15.84   10.38 
  -4  -6  18   -1.60    3.28 
  -4  -6  17    3.03    4.63 
   4   6 -17    8.94    4.70 
  -4  -6  16    9.10    7.08 
   4   6 -16   13.37    8.56 
   4   6 -15   -4.86    5.44 
   4   6 -14   -1.87    4.62 
   4   6 -13    4.27    4.24 
   4   6 -12   13.74    7.92 
  -4   6  12   15.20    6.38 
  -4   6  11   -6.45    4.11 
   4   6 -11   -3.82    3.31 
  -4   6  10  141.59   15.90 
   4   6 -10  128.88   19.18 
   4   6  -9   14.25    6.89 
  -4   6   9   11.38    3.57 
  -4   6   8   22.78    5.48 
   4   6  -8   18.77    6.51 
   4   6  -7   31.62    8.52 
  -4   6   7   34.54    6.10 
  -4   6   6   14.19    3.17 
   4   6  -6   13.76    5.16 
   4  -6  -6   15.19    2.68 
  -4   6   5    2.96    1.17 
   4  -6  -5    2.38    0.94 
   4   6  -5    0.58    2.35 
  -4   6   4    1.23    0.75 
   4  -6  -4    0.59    1.67 
   4   6  -4   -0.90    2.91 
   4  -6  -3   -1.09    1.32 
   4   6  -3    0.20    3.08 
   4  -6  -2    6.07    2.71 
   4  -6  -1    1.38    1.40 
   4  -6   0    7.33    3.73 
  -4  -6  -1    1.69    3.67 
   4  -6   1    2.36    3.33 
  -4  -6  -2    0.97    1.86 
   4  -6   2   -0.81    2.11 
   4  -6   3   23.30    8.04 
  -4  -6  -3   16.01    6.01 
  -4  -6  -4   25.38    6.75 
   4  -6   4   28.05    8.67 
   4  -6   4   30.44    5.50 
   4  -6   5   19.98    5.73 
   4  -6   5   15.85    5.75 
  -4  -6  -5   12.22    4.52 
  -4  -6  -6    3.69    1.62 
   4  -6   6   -0.10    5.24 
   4  -6   6    2.16    2.57 
   4  -6   7   -3.98    4.84 
   4  -6   7   -1.50    2.86 
  -4  -6  -7    1.76    3.80 
   4  -6   8   -5.41    4.65 
   4  -6   8   -0.14    2.44 
  -4  -6  -8    0.94    2.67 
   4  -6   9    2.18    3.07 
   4  -6   9    1.85    3.50 
  -4  -6  -9   -0.13    3.55 
  -4  -6 -10    5.24    2.16 
   4  -6  10    9.78    7.23 
   4  -6  11    9.04    7.90 
   4  -6  12   12.37    9.17 
   4  -6  13    5.38    5.89 
   4  -6  14   -5.32    7.11 
   4  -6  15   -7.34    6.68 
   4  -6  16    2.93    8.79 
   4  -6  17   19.31   11.51 
   4   7 -19   11.87    8.77 
  -4  -7  18   13.69    7.18 
   4   7 -18    8.18    3.81 
  -4  -7  17    9.26    9.68 
   4   7 -17    0.45    6.09 
  -4  -7  16    3.19    5.85 
   4   7 -16  -13.37    9.69 
   4   7 -15   -6.00    7.20 
   4   7 -14    5.05    5.05 
   4   7 -13   -5.35    6.26 
   4   7 -12   -3.54    5.68 
  -4   7  11   -5.55    5.21 
   4   7 -11    9.91    6.38 
  -4   7  10    7.59    3.66 
   4   7 -10    8.07    6.00 
  -4   7   9   37.69    6.98 
   4   7  -9   27.71    8.27 
  -4   7   8   17.39    3.61 
   4   7  -8   15.22    6.28 
   4   7  -7  106.14   16.22 
  -4   7   7  121.02   11.02 
  -4   7   6    8.14    2.61 
   4   7  -6    0.83    3.24 
   4  -7  -6   12.86    2.94 
   4  -7  -5    0.72    1.60 
  -4   7   5   -2.49    1.66 
   4   7  -5   -1.18    1.95 
   4   7  -4    1.09    3.38 
  -4   7   4    1.22    0.87 
  -4   7   4    2.78    0.97 
   4  -7  -4   -0.89    1.93 
   4  -7  -3   18.57    4.86 
   4   7  -3   14.94    5.90 
   4  -7  -2   19.43    4.97 
   4   7  -2   23.70    6.87 
   4  -7  -1    8.30    4.11 
   4  -7   0    4.95    3.87 
   4  -7   1    5.32    4.30 
  -4  -7  -1    4.39    2.16 
   4  -7   2    5.52    3.88 
  -4  -7  -2    7.07    4.62 
  -4  -7  -3   36.88    9.47 
   4  -7   3   28.97    8.48 
   4  -7   4   41.11   10.74 
  -4  -7  -4   54.50   10.95 
   4  -7   5  101.08   18.46 
  -4  -7  -5   80.70   12.96 
  -4  -7  -6   11.72    5.10 
   4  -7   6   15.50    3.72 
   4  -7   6   19.96    8.51 
   4  -7   7    5.01    3.25 
   4  -7   7    7.23    6.79 
  -4  -7  -7    6.48    2.17 
  -4  -7  -8   -0.02    2.34 
   4  -7   8    4.02    4.11 
   4  -7   8    5.42    6.09 
   4  -7   9    1.65    9.02 
   4  -7  10    2.48    3.76 
   4  -7  11    7.75    8.98 
   4  -7  12    8.71    8.95 
   4  -7  13    6.11    4.37 
   4  -7  14   -6.14    7.35 
   4  -7  15   -1.29    7.33 
   4   8 -19   -6.27    8.53 
   4   8 -18    0.47    5.59 
   4   8 -17   -1.78    4.05 
  -4  -8  17   -2.87    8.28 
   4   8 -16   -7.00    8.22 
  -4  -8  16    9.55    9.05 
   4   8 -15    2.50    6.42 
   4   8 -14   19.45   10.49 
   4   8 -13   -0.69    3.98 
   4   8 -12    5.30    6.32 
   4   8 -11    3.72    4.53 
   4   8 -10   -2.81    3.55 
   4   8  -9   13.09    7.22 
  -4   8   8    5.97    3.81 
   4   8  -8   -5.49    5.28 
  -4   8   7   10.71    3.40 
   4  -8  -7    5.95    1.54 
   4  -8  -7    5.98    1.30 
   4   8  -7    8.81    4.81 
   4   8  -6    2.39    2.98 
  -4   8   6    1.51    1.71 
   4  -8  -6    6.62    2.87 
  -4   8   5    0.86    0.85 
  -4   8   5    0.57    0.59 
   4  -8  -5    1.28    1.41 
   4   8  -5   -0.29    3.46 
   4   8  -4   11.69    6.10 
   4  -8  -4    5.02    2.56 
   4   8  -3    6.59    5.42 
   4  -8  -3    0.68    1.73 
   4   8  -2    2.15    3.32 
   4  -8  -2    0.28    2.48 
   4  -8  -1    4.04    2.52 
   4  -8   0   -0.28    2.40 
   4  -8   1   22.37    7.15 
   4  -8   2    4.82    4.72 
  -4  -8  -2   -1.87    5.87 
  -4  -8  -3    0.80    3.05 
   4  -8   3    2.34    4.45 
  -4  -8  -4    2.28    4.32 
   4  -8   4    7.73    5.13 
  -4  -8  -5    0.58    2.23 
   4  -8   5   -2.52    5.01 
   4  -8   6   -0.08    2.83 
   4  -8   7   -6.93    6.04 
   4  -8   8   12.81    8.89 
   4  -8   9    6.04    4.75 
   4  -8  10    1.86    3.84 
   4  -8  11   -9.04    8.59 
   4  -8  12    3.80    8.03 
   4  -8  13   15.87    6.38 
   4  -8  14    2.89    6.84 
   4   9 -18    0.91    8.52 
   4   9 -17   -5.05   11.52 
   4   9 -16  -11.23    3.67 
   4   9 -15   -0.11    3.02 
  -4  -9  15    1.27    5.41 
   4   9 -14   -7.44    7.79 
   4   9 -13   -1.65    4.80 
   4   9 -12   -2.94    4.42 
   4   9 -11   -1.03    4.53 
   4   9 -10    4.82    4.54 
   4   9  -9    2.87    2.89 
   4   9  -8   -4.60    3.87 
   4   9  -7    2.31    4.66 
   4  -9  -6    3.68    2.85 
   4   9  -6    6.71    5.17 
   4   9  -5    2.91    4.13 
   4  -9  -5   -0.38    2.03 
   4   9  -4   19.63    7.42 
   4  -9  -4   26.42    6.33 
   4  -9  -3   -1.13    2.55 
   4   9  -3    1.26    2.37 
   4  -9  -2    6.13    4.16 
   4   9  -2   12.29    8.14 
   4  -9  -1   22.33    7.60 
   4   9  -1   16.94    7.40 
   4  -9   0   -1.17    3.75 
   4  -9   1    5.34    3.80 
   4  -9   2   -7.86    5.74 
   4  -9   3   -3.34    5.28 
   4  -9   4   -1.39    4.02 
   4  -9   5   19.63    7.55 
   4  -9   6  -12.06    7.24 
   4  -9   7    4.65    6.36 
   4  -9   8    5.81    8.26 
   4  -9   9    0.99    3.93 
   4  -9  10  -13.93   11.38 
   4  -9  11    5.71    8.75 
   4  -9  12    4.33    9.01 
   4  10 -15   -7.51    5.03 
   4  10 -14  -18.38   12.81 
   4  10 -13  -15.87   10.66 
   4  10 -12   -2.17    3.53 
   4  10 -11    5.16    6.70 
   4  10 -10   12.42    8.53 
   4  10  -9   -3.81    6.70 
   4  10  -8   -1.27    5.21 
   4  10  -7    0.04    7.10 
   4  10  -6   -4.95    4.88 
   4  10  -5   -5.03    5.51 
   4  10  -4    1.15    2.75 
   4 -10  -4    2.20    1.91 
   4 -10  -3   -5.98    4.53 
   4  10  -3    0.46    5.42 
   4 -10  -2   -0.59    3.94 
   4  10  -2   -1.76    3.16 
   4  10  -1    2.58    3.63 
   4 -10  -1   -3.63    4.70 
   4  10   0    2.66    7.14 
   4 -10   0    8.97    7.14 
   4 -10   1   -3.60    3.94 
   4 -10   2    3.41    5.33 
   4 -10   3   -7.59    6.07 
   4 -10   4   -5.95    3.43 
   4 -10   5   14.76    8.67 
   4 -10   6    8.78    8.97 
   4 -10   7   -1.77    5.16 
   4 -10   8   14.99    3.39 
   4 -10   9   -5.69    4.00 
   4 -10  10    4.41    3.43 
   4 -11  -1    1.54    5.01 
   4 -11   0    0.76    5.60 
   4 -11   1    5.03    4.75 
   4 -11   2  -14.28   11.43 
   4 -11   3    3.70    5.59 
   4 -11   4    3.87    3.57 
   4 -11   5   -1.51    3.97 
   4 -11   6   -6.19    7.95 
   4 -11   7   -0.83   11.01 
   4 -11   8   39.54   15.01 
   4 -12   2   -9.54   10.76 
   4 -12   3    1.51    4.27 
   4 -12   4   -0.45   11.32 
   4 -12   5   -6.46    5.85 
   4 -12   6   10.40    8.86 
  -5   0  22   10.60    4.68 
  -5   0  21    0.26    2.72 
  -5   0  20    4.25    2.48 
  -5   0  19    1.81    2.46 
  -5   0  18    7.84    4.14 
  -5   0  17    0.39    1.76 
  -5   0  16   25.36    8.27 
  -5   0  15   -1.55    3.27 
   5   0 -15   -2.46    4.26 
   5   0 -14   12.01    7.22 
   5   0 -13    1.51    2.74 
   5   0 -12   20.77    7.07 
  -5   0  12   17.90    6.76 
   5   0 -11    2.24    2.04 
   5   0 -10    2.29    2.55 
   5   0  -9    4.44    3.78 
   5   0  -8    5.75    4.01 
   5   0  -7    2.25    1.84 
   5   0  -6   40.90    7.15 
   5   0  -5    5.51    3.04 
  -5   0   4    4.93    2.78 
   5   0  -4   -0.24    1.49 
  -5   0   3    0.94    2.29 
  -5   0   2 4040.13   60.32 
  -5   0   1    1.31    2.37 
  -5   0   0  245.23   16.08 
  -5   0  -1    0.58    1.65 
  -5   0  -2   94.21   11.36 
  -5   0  -3    0.44    1.59 
  -5   0  -4   23.01    6.02 
  -5   0  -5   -1.67    2.08 
   5   0   5   -1.64    2.45 
  -5   0  -6   31.11    8.02 
   5   0   6   36.80    8.61 
  -5   0  -7   -1.97    4.22 
   5   0   7    0.04    1.68 
   5   0   8   35.99    9.55 
  -5   0  -8   55.26   11.00 
  -5   0  -9   -1.02    2.23 
   5   0   9    3.34    2.35 
  -5   0 -10    7.99    6.43 
   5   0  10   -1.73    2.59 
   5   0  11   -4.58    3.76 
   5   0  12    1.26    2.90 
   5   0  13   -2.14    3.20 
   5   0  14    3.36    2.67 
   5   0  15    3.67    5.30 
   5   0  16   -6.16    6.11 
   5   0  17   -3.28    4.47 
   5   0  18    9.10    8.11 
   5   0  19    3.51    6.14 
   5   0  20    8.57    7.30 
   5   0  21   -2.74    8.98 
  -5  -1  23   -5.34    2.98 
  -5  -1  22    6.71    6.26 
  -5  -1  21   -0.03    2.58 
  -5  -1  20    3.71    5.42 
  -5   1  20   -0.65    4.45 
  -5  -1  19   -6.43    6.08 
  -5   1  19    1.56    3.03 
  -5  -1  18   -7.01    5.23 
  -5   1  18   -2.60    3.54 
  -5  -1  17    6.54    5.53 
  -5   1  17    4.99    2.62 
   5   1 -17   18.20    9.72 
  -5  -1  16   65.73   13.23 
  -5   1  16   64.48   11.36 
   5   1 -16   36.12   12.46 
   5   1 -15    1.97    2.62 
  -5   1  15    8.92    5.32 
  -5   1  14   -0.34    2.28 
   5   1 -14   -1.36    5.02 
  -5   1  13   16.13    5.20 
   5   1 -13   11.36    5.83 
   5  -1 -13   18.03    7.39 
   5   1 -12    5.81    3.85 
   5  -1 -12    4.06    2.24 
  -5   1  12   13.48    4.92 
  -5   1  11   23.93    7.50 
   5   1 -11   25.42    8.19 
   5  -1 -11   12.63    5.50 
   5   1 -10   -1.41    2.86 
  -5   1  10    3.93    3.50 
   5  -1 -10    2.28    2.62 
  -5   1   9   63.25    9.87 
   5   1  -9   48.78    9.90 
   5  -1  -9   55.60    9.50 
   5  -1  -8   13.79    4.86 
  -5   1   8    8.27    3.20 
   5   1  -8    8.03    4.38 
  -5   1   7    5.36    3.14 
   5  -1  -7    5.57    3.55 
   5   1  -7    5.14    3.24 
  -5   1   6    7.06    3.57 
  -5   1   6    0.98    1.88 
   5   1  -6    0.18    1.78 
   5  -1  -6    6.23    3.49 
  -5   1   5    1.51    1.85 
  -5   1   5   -1.54    1.37 
   5  -1  -5   -1.04    2.29 
   5   1  -5   -1.23    2.58 
  -5   1   4    3.27    2.14 
   5  -1  -4    2.93    1.82 
   5   1  -4    9.26    3.56 
   5  -1  -4    4.93    2.31 
  -5  -1   3    3.97    2.39 
  -5   1   3    8.43    2.88 
   5  -1  -3    6.19    2.62 
   5  -1  -3    7.65    2.60 
  -5  -1   2    1.87    1.75 
  -5   1   2    3.31    1.74 
  -5   1   1   74.91    8.79 
  -5  -1   1   78.77    9.06 
  -5   1   0  125.78   12.07 
  -5  -1   0  110.93   11.18 
  -5  -1  -1    3.20    3.23 
  -5   1  -1   -3.91    2.87 
  -5   1  -2   84.59   10.90 
  -5  -1  -2   74.72    9.83 
   5   1   3   -3.53    2.67 
  -5  -1  -3   -0.80    2.44 
  -5   1  -3   -2.27    1.56 
   5   1   4    3.09    3.29 
  -5   1  -4    9.67    4.86 
  -5  -1  -4    1.77    1.86 
  -5   1  -5   17.31    5.70 
   5   1   5    7.56    3.39 
  -5  -1  -5    7.40    3.35 
  -5  -1  -6   30.82    7.44 
  -5   1  -6   16.24    5.97 
   5   1   6   17.90    6.14 
  -5   1  -7   13.42    5.63 
   5  -1   7    9.14    5.77 
  -5  -1  -7   10.34    4.21 
   5   1   7   11.62    5.06 
  -5  -1  -8    3.69    3.88 
  -5   1  -8    9.20    5.83 
   5  -1   8   -1.85    2.35 
   5   1   8   -3.52    3.81 
  -5   1  -9    0.36    3.78 
   5  -1   9    2.76    2.20 
  -5  -1  -9    5.82    4.49 
   5   1   9    5.14    3.91 
   5  -1   9    6.88    4.51 
   5  -1  10    2.07    4.01 
  -5  -1 -10    3.79    5.20 
   5   1  10   -1.10    3.54 
   5  -1  11   32.29   10.61 
   5   1  11   27.10    7.93 
   5  -1  12   19.66    7.92 
   5   1  12   19.23    8.07 
   5  -1  13    1.87    3.65 
   5   1  13   -2.19    2.62 
   5  -1  14    8.62    5.55 
   5   1  14   -2.61    3.65 
   5  -1  15   -2.03    3.02 
   5   1  15    8.17    3.79 
   5  -1  16   -6.94    5.45 
   5   1  16   -8.26    6.61 
   5  -1  17    1.81    3.87 
   5   1  17   -1.83    5.88 
   5  -1  18    9.19    7.92 
   5   1  18   -0.63    2.90 
   5  -1  19   17.87    7.56 
   5   1  19   -1.69    7.24 
   5   1  20   -3.74    6.12 
   5  -1  20   15.88   10.50 
   5  -1  21   -3.53   10.64 
  -5  -2  24  -16.48   12.09 
  -5  -2  23   -3.76    7.25 
  -5  -2  22    4.90    6.57 
  -5  -2  21   -2.76    5.38 
  -5  -2  20   -4.93    6.98 
  -5  -2  19    1.56    3.76 
  -5   2  19   -2.18    4.25 
   5   2 -18   -4.81    4.92 
  -5  -2  18    6.29    5.91 
  -5   2  18   -2.59    3.23 
   5   2 -17   13.97    6.37 
  -5   2  17    6.68    2.03 
  -5  -2  17    8.98    6.74 
   5   2 -16    9.89    6.84 
  -5   2  16   17.51    5.89 
  -5   2  15    8.70    2.48 
   5   2 -15    6.54    5.42 
  -5   2  14    2.74    3.24 
   5   2 -14    3.74    5.39 
   5   2 -13    9.12    6.70 
  -5   2  13    6.03    2.96 
   5   2 -12    5.48    4.97 
  -5   2  12    0.19    1.94 
  -5   2  12   -2.29    5.78 
  -5   2  11    1.73    2.75 
   5   2 -11    7.77    5.56 
   5  -2 -11    4.13    3.28 
  -5   2  11    3.23    1.51 
  -5   2  10   23.31    6.58 
   5   2 -10   23.17    7.36 
   5  -2 -10   22.45    6.17 
   5   2  -9    2.29    2.48 
  -5   2   9    7.55    3.58 
   5  -2  -9    3.06    2.28 
  -5   2   8   11.42    2.75 
   5   2  -8   14.21    5.88 
  -5   2   8   19.72    5.03 
   5  -2  -8   10.65    3.88 
   5   2  -7    6.34    3.38 
  -5   2   7    1.56    1.60 
   5  -2  -7    4.06    2.70 
  -5   2   7    1.63    1.50 
   5  -2  -6   -2.55    2.10 
  -5   2   6   -1.46    1.09 
  -5   2   6    0.52    1.27 
   5   2  -6    3.44    3.54 
  -5   2   5   -1.37    1.33 
   5  -2  -5   -2.14    1.59 
   5   2  -5    0.86    2.06 
  -5   2   5   -2.17    2.67 
   5  -2  -4   91.78    7.34 
   5  -2  -4   83.39    7.09 
  -5   2   4   80.40    7.25 
  -5   2   4   96.96    7.74 
   5   2  -4   80.03   10.08 
   5  -2  -3   69.00    5.59 
   5  -2  -3   72.05    7.26 
  -5   2   3   74.43    7.54 
   5  -2  -2  125.49   10.41 
  -5  -2   2  116.02   12.67 
  -5   2   2  115.55   10.04 
   5  -2  -1   59.75    7.85 
  -5   2   1   64.33    7.90 
  -5  -2   1   50.37    7.98 
  -5  -2   0   22.54    4.85 
  -5   2   0   18.83    4.81 
   5   2   1   26.81    6.22 
  -5   2  -1   24.69    5.64 
  -5  -2  -1   30.21    6.36 
  -5  -2  -2   62.05    8.91 
  -5   2  -2   66.76   10.12 
   5   2   2   62.91    9.40 
   5   2   3   16.62    5.04 
  -5  -2  -3   20.59    6.12 
  -5   2  -3   14.47    4.49 
  -5   2  -4   82.81   12.51 
  -5  -2  -4   66.18   10.17 
   5   2   4   58.41    9.36 
   5   2   5   -2.76    1.90 
  -5   2  -5   -2.11    3.41 
  -5  -2  -5   -1.78    2.47 
  -5   2  -6   46.80   10.01 
  -5  -2  -6   41.06    8.77 
   5   2   6   48.70    9.42 
   5  -2   6   44.10    8.89 
   5   2   7   13.72    5.21 
  -5   2  -7    9.69    4.82 
  -5  -2  -7   15.10    4.88 
   5  -2   7   21.09    6.67 
  -5  -2  -8   -2.43    1.90 
  -5   2  -8    2.22    1.79 
   5  -2   8   -1.56    3.13 
   5   2   8   -1.24    1.75 
   5  -2   8    0.47    2.87 
   5  -2   9   10.07    5.63 
  -5  -2  -9    5.19    1.76 
   5  -2   9    9.86    5.69 
   5   2   9    6.35    5.28 
   5   2  10    5.99    3.86 
  -5  -2 -10   -2.17    3.37 
   5  -2  10   -4.88    4.35 
  -5  -2 -11   24.78    6.72 
   5   2  11   22.11    8.26 
   5  -2  11   19.17    6.56 
   5   2  12    3.43    3.50 
   5  -2  12    9.00    6.01 
   5   2  13   -4.39    1.96 
   5  -2  13   -3.98    3.43 
   5   2  14    2.11    5.06 
   5  -2  14   18.04    9.52 
   5   2  15   -5.23    4.17 
   5  -2  15    3.01    5.41 
   5   2  16   -2.22    2.90 
   5  -2  16   -2.38    5.04 
   5   2  17  -11.03    4.65 
   5  -2  17   12.14    8.28 
   5   2  18   12.35    7.85 
   5  -2  18   -1.81    4.73 
   5   2  19   -4.81    3.29 
   5  -2  19    5.95    8.91 
   5  -2  20    9.15    6.45 
  -5  -3  24    8.88    9.89 
  -5  -3  23   -1.34    4.39 
  -5  -3  22   -8.39    7.38 
  -5  -3  21   -6.63    5.88 
  -5  -3  20   -3.61    6.92 
  -5  -3  19    4.99    6.66 
   5   3 -19   -2.18    5.62 
   5   3 -18    6.20    4.52 
  -5  -3  18    1.37    3.20 
   5   3 -17   21.68   11.02 
  -5  -3  17   51.27   15.23 
  -5   3  17   43.09    7.64 
  -5   3  16    2.17    1.78 
   5   3 -16    7.09    6.88 
   5   3 -15   -6.52    4.97 
  -5   3  15    5.86    2.87 
  -5   3  14    5.52    2.92 
   5   3 -14    3.34    3.86 
  -5   3  13   -0.73    1.61 
   5   3 -13    1.31    2.99 
   5   3 -12   -2.71    5.87 
  -5   3  12   -3.39    5.07 
  -5   3  12    1.54    0.96 
   5   3 -11   36.73   10.56 
  -5   3  11   35.63    3.61 
  -5   3  11   20.49    3.28 
  -5   3  11   39.45    9.03 
  -5  -3  10    9.55    5.45 
   5   3 -10    3.41    4.54 
  -5   3  10   10.05    3.59 
  -5  -3   9   38.99    9.33 
   5   3  -9   43.03    9.90 
  -5   3   9   40.33    7.64 
   5   3  -8   15.59    6.04 
  -5   3   8   17.58    5.07 
   5   3  -7    5.37    3.37 
  -5   3   7    8.95    3.33 
   5   3  -6    2.61    2.48 
  -5   3   6    6.08    1.55 
  -5   3   6    4.90    2.28 
   5  -3  -5   95.37    6.72 
  -5   3   5   91.95    7.76 
   5   3  -5   93.15   12.11 
  -5   3   5   97.71    6.71 
   5  -3  -4   16.77    3.07 
   5   3  -4   14.57    4.73 
  -5   3   4   14.99    3.08 
   5  -3  -4   11.83    2.15 
  -5   3   4   14.14    2.79 
  -5   3   3   34.02    4.91 
   5  -3  -3   36.38    3.01 
   5  -3  -3   31.58    5.29 
  -5   3   2   16.24    3.51 
   5  -3  -2   22.09    4.77 
  -5   3   1    2.51    1.67 
   5  -3  -1    3.62    2.59 
  -5  -3   1    1.15    2.24 
  -5  -3   0   15.81    4.89 
  -5   3   0   18.16    5.18 
   5  -3   0   16.42    4.64 
   5  -3   1    5.49    1.79 
  -5  -3  -1   12.41    4.61 
  -5   3  -1    8.64    3.11 
   5  -3   1    8.39    3.44 
  -5   3  -2   10.37    4.26 
  -5  -3  -2    3.73    3.85 
   5  -3   2    9.45    3.23 
   5   3   2   12.01    3.88 
  -5  -3  -3   49.30    8.49 
   5   3   3   43.12    7.57 
  -5   3  -3   46.30    9.39 
   5  -3   3   46.22    6.79 
  -5  -3  -4   73.53   10.85 
   5   3   4   83.38   11.61 
   5  -3   4   76.91   10.01 
  -5   3  -4   91.43   13.50 
   5  -3   5    6.11    3.02 
  -5   3  -5    4.55    2.75 
   5   3   5    1.43    1.74 
  -5  -3  -5    8.71    5.43 
   5   3   6   -0.21    2.54 
  -5   3  -6   -1.14    3.62 
   5  -3   6    1.68    1.88 
  -5  -3  -6   -2.73    2.80 
   5  -3   7   54.03   10.14 
  -5  -3  -7   64.71   10.87 
   5   3   7   51.24   10.16 
  -5  -3  -8    5.79    3.80 
   5   3   8    8.25    4.82 
   5  -3   8    6.48    2.54 
   5  -3   8    9.23    4.78 
   5  -3   9    7.26    2.56 
   5   3   9    6.06    5.00 
   5  -3   9    3.05    3.70 
  -5  -3  -9    7.58    2.81 
   5  -3  10    0.54    2.54 
   5   3  10    8.11    5.73 
  -5  -3 -10    0.60    2.52 
   5   3  11    2.64    4.30 
  -5  -3 -11    0.28    2.05 
   5  -3  11    7.95    6.08 
   5   3  12   -1.38    2.60 
  -5  -3 -12   -0.60    4.30 
   5  -3  12    4.84    3.42 
   5  -3  13   39.68   13.78 
   5   3  13   18.43    7.68 
   5   3  14   10.93    7.67 
   5  -3  14   11.23    7.12 
   5   3  15   -2.24    6.34 
   5  -3  15   -5.46    5.14 
   5   3  16   11.40    4.59 
   5  -3  16   13.90    9.22 
   5   3  17    2.29    5.17 
   5  -3  17   -0.30    5.09 
   5  -3  18   -1.29    8.31 
   5  -3  19   11.18    9.79 
  -5  -4  23   -7.80    8.57 
  -5  -4  22   -9.13    7.28 
  -5  -4  21    3.14    5.53 
  -5  -4  20    3.42    7.17 
  -5  -4  19    5.09    4.37 
   5   4 -19    2.86    6.13 
  -5  -4  18   -6.06    4.18 
   5   4 -18   -1.54    4.15 
   5   4 -17    2.32    3.04 
   5   4 -16   -1.31    3.01 
   5   4 -15   -1.41    4.49 
   5   4 -14   12.56    7.35 
   5   4 -13    1.89    2.70 
  -5   4  13    4.87    3.02 
   5   4 -12   11.25    5.32 
  -5   4  12    9.36    4.12 
  -5   4  11   -2.29    3.77 
   5   4 -11   -1.74    3.98 
   5   4 -10    7.81    5.19 
  -5   4  10    6.22    2.87 
  -5   4   9    6.59    2.81 
  -5  -4   9   -0.86    3.96 
   5   4  -9    5.35    4.27 
   5   4  -8   52.34   10.65 
  -5   4   8   59.41    8.43 
  -5   4   7    5.05    2.60 
   5   4  -7    2.75    2.76 
  -5   4   6   23.95    4.41 
   5   4  -6   26.79    6.81 
  -5   4   5    6.83    2.15 
   5   4  -5    8.71    4.70 
   5  -4  -5    9.99    2.34 
   5   4  -4   13.66    4.53 
   5  -4  -4   15.17    3.14 
   5  -4  -3   17.78    4.15 
   5  -4  -2  139.16   12.22 
   5  -4  -1   92.22   10.57 
   5  -4   0   88.69   11.09 
  -5  -4   0   99.80   13.19 
   5  -4   1    2.25    1.55 
  -5  -4  -1    6.27    3.52 
   5  -4   1    6.61    1.67 
  -5  -4  -2   -0.49    2.36 
   5  -4   2    0.86    1.73 
   5  -4   2    0.67    1.78 
  -5  -4  -3   22.37    6.68 
   5  -4   3   18.37    4.45 
   5  -4   3   18.49    6.48 
   5  -4   4   52.63    8.04 
  -5  -4  -4   60.02   10.20 
   5   4   5    6.92    2.87 
   5  -4   5    1.89    1.80 
  -5  -4  -5    2.32    2.49 
   5  -4   6   22.37    5.87 
  -5  -4  -6   17.39    5.28 
   5   4   6   16.87    5.28 
   5  -4   6   12.08    6.57 
   5  -4   7    3.22    3.12 
   5  -4   7    4.22    3.79 
   5   4   7    3.17    2.22 
  -5  -4  -7    1.19    2.49 
   5   4   8   -2.00    3.66 
   5  -4   8    5.02    5.44 
  -5  -4  -8    1.24    4.32 
   5  -4   8    6.65    3.61 
  -5  -4  -9   -3.27    3.55 
   5  -4   9   -0.35    2.78 
   5  -4   9    0.38    4.07 
   5   4   9    2.55    2.96 
   5  -4  10    3.35    4.76 
  -5  -4 -10    7.86    5.23 
   5   4  10    1.93    2.34 
   5   4  11   -3.68    4.49 
  -5  -4 -11   -0.79    5.77 
   5  -4  11   -3.17    5.16 
   5   4  12   11.19    6.23 
  -5  -4 -12   10.58    2.78 
   5   4  13    4.12    4.27 
   5  -4  13    7.15    5.72 
   5   4  14   -1.84    2.77 
   5  -4  14   -1.74    5.73 
   5   4  15    1.81    3.08 
   5  -4  15    4.73    3.97 
   5   4  16    3.56    6.58 
   5  -4  16   13.09   10.40 
   5  -4  17    6.52    7.75 
   5  -4  18   11.99    9.57 
  -5  -5  21   13.20    8.03 
   5   5 -20   -1.90    3.24 
  -5  -5  20   -5.42    5.23 
  -5  -5  19   -3.80    3.58 
   5   5 -19    7.67    5.71 
  -5  -5  18    5.72    5.49 
   5   5 -18    9.95    4.76 
   5   5 -17    1.65    3.86 
   5   5 -16   13.17    8.57 
   5   5 -15    7.54    6.94 
   5   5 -14   -8.21    6.15 
   5   5 -13    2.27    4.22 
  -5   5  12   22.81    7.08 
   5   5 -12   16.21    8.26 
   5   5 -11   -1.77    3.40 
  -5   5  11   -3.17    3.02 
  -5   5  10   43.36    8.13 
   5   5 -10   52.10   12.32 
  -5   5   9   10.76    4.08 
   5   5  -9   -1.68    3.33 
   5   5  -8    1.75    2.19 
  -5   5   8    2.41    2.03 
   5   5  -7   11.80    4.86 
  -5   5   7    5.25    2.63 
   5  -5  -6    9.88    1.83 
  -5   5   6    8.25    2.20 
   5   5  -6   12.53    5.46 
  -5   5   5    1.94    1.09 
   5   5  -5    1.63    2.11 
   5  -5  -5    5.78    1.64 
   5   5  -4    4.44    3.21 
   5  -5  -4    0.41    1.39 
   5  -5  -3   75.44    9.02 
   5  -5  -2    1.32    2.19 
   5  -5  -1   27.33    6.44 
  -5  -5   0   -0.29    3.54 
   5  -5   0   -3.34    2.90 
  -5  -5  -1    2.35    3.30 
   5  -5   1    6.92    4.34 
  -5  -5  -2   44.06    8.56 
   5  -5   2   50.54    5.58 
   5  -5   2   49.73   10.15 
   5  -5   3   21.31    4.51 
  -5  -5  -3   16.48    4.75 
   5  -5   3   19.52    6.49 
   5  -5   4    6.95    3.56 
  -5  -5  -4    9.92    4.62 
   5  -5   4    4.40    1.83 
  -5  -5  -5    3.36    1.92 
   5  -5   5   -2.99    2.62 
   5  -5   5   -2.41    2.20 
   5  -5   6   -0.08    2.90 
   5  -5   6   -0.26    2.59 
  -5  -5  -6    3.08    1.59 
  -5  -5  -7   23.35    8.07 
   5  -5   7   21.38    6.68 
   5  -5   7   25.46    8.38 
   5  -5   8    7.68    5.66 
   5  -5   8    1.63    4.14 
  -5  -5  -8    0.21    3.98 
   5  -5   9    0.83    3.43 
  -5  -5  -9    5.51    3.98 
   5   5   9   -2.56    3.86 
   5  -5   9   -6.43    5.63 
   5   5  10   -0.99    2.58 
  -5  -5 -10    3.29    3.13 
   5   5  11    0.79    2.43 
  -5  -5 -11    1.77    6.11 
   5  -5  11    0.97    4.39 
   5   5  12   -0.26    3.37 
   5  -5  12   12.58    9.19 
   5  -5  13    0.82    3.31 
   5   5  13   -6.70    4.39 
   5   5  14    2.65    3.74 
   5  -5  14   -2.83    6.18 
   5  -5  15    1.17    6.50 
   5  -5  16   -1.45    8.64 
   5  -5  17   -6.86   10.17 
   5   6 -20  -15.22   13.09 
  -5  -6  20   -5.91   10.73 
  -5  -6  19   -6.59    4.47 
   5   6 -19    0.65    5.63 
   5   6 -18   -8.18    7.00 
  -5  -6  18   -0.37    4.25 
   5   6 -17   -3.77    6.21 
   5   6 -16   -5.80    3.88 
   5   6 -15   -2.08    4.11 
   5   6 -14    0.30    3.30 
   5   6 -13    7.00    6.47 
   5   6 -12    4.52    3.40 
  -5   6  12    1.94    1.92 
  -5   6  11   35.50    8.30 
   5   6 -11   29.52    9.31 
  -5   6  10    4.05    3.15 
   5   6 -10   -0.37    3.37 
  -5   6   9   16.05    4.72 
   5   6  -9   13.06    6.52 
   5   6  -8   32.98    9.98 
  -5   6   8   30.84    5.56 
   5   6  -7   13.58    6.05 
  -5   6   7   14.48    3.69 
  -5   6   6    1.60    0.86 
   5   6  -6    4.31    4.82 
   5  -6  -6    3.09    1.47 
   5   6  -5   14.06    5.15 
   5  -6  -5   20.49    4.02 
   5   6  -4   14.77    5.65 
   5  -6  -4   12.79    3.78 
   5   6  -3    5.65    3.44 
   5  -6  -3    2.16    1.64 
   5  -6  -2    3.21    2.10 
   5  -6  -1    4.34    4.61 
  -5  -6   0    2.47    1.90 
   5  -6   0    5.25    4.54 
  -5  -6  -1    8.65    5.29 
   5  -6   1    5.37    2.81 
  -5  -6  -2    4.25    4.30 
   5  -6   2   -1.70    3.12 
   5  -6   3   -2.02    2.10 
  -5  -6  -3   -1.03    1.78 
   5  -6   3    3.68    3.78 
  -5  -6  -4   51.32   11.22 
   5  -6   4   51.17   11.80 
   5  -6   4   58.50    7.78 
   5  -6   5    0.06    1.29 
  -5  -6  -5    0.54    3.49 
   5  -6   5   -2.09    2.11 
   5  -6   6   19.27    6.14 
  -5  -6  -6   12.93    5.33 
   5  -6   6    9.57    4.75 
   5  -6   7   45.07    8.99 
   5  -6   7   36.65   11.59 
  -5  -6  -7   24.30    6.30 
   5  -6   8   11.16    6.11 
   5  -6   8    0.84    2.59 
  -5  -6  -8    8.16    6.53 
   5  -6   9    9.24    4.75 
  -5  -6  -9   10.86    3.27 
   5  -6   9   10.80    5.40 
   5  -6  10   -0.54    4.34 
  -5  -6 -10    0.38    4.64 
   5  -6  11    7.59    8.03 
   5  -6  12    5.20    6.39 
   5  -6  13   14.04    8.59 
   5  -6  14    9.29    9.26 
   5  -6  15   -4.13    6.21 
   5  -6  16   -7.54   10.18 
   5   7 -19   -0.02    6.39 
  -5  -7  18   28.15   12.57 
   5   7 -18    1.18    4.22 
  -5  -7  17   -5.06    8.96 
   5   7 -17   -9.70    7.68 
   5   7 -16   -4.53    3.02 
   5   7 -15    0.21    4.41 
   5   7 -14   13.68    7.02 
   5   7 -13    2.50    6.02 
   5   7 -12  -11.50    7.03 
   5   7 -11   -8.19    7.12 
  -5   7  11    5.72    4.89 
  -5   7  10    6.33    4.69 
   5   7 -10    0.18    2.20 
  -5   7   9   37.47    7.02 
   5   7  -9   25.69    9.01 
  -5   7   8    4.04    2.87 
   5   7  -8    0.64    3.13 
  -5   7   7   37.29    5.67 
   5   7  -7   22.07    7.83 
  -5   7   6   12.84    2.65 
   5   7  -6   15.09    5.69 
   5  -7  -6   20.49    3.90 
   5   7  -5   42.07   10.17 
   5  -7  -5   44.04    6.72 
   5   7  -4   -3.12    4.34 
   5  -7  -4   -2.28    2.78 
   5   7  -3   39.17    9.76 
   5  -7  -3   45.42    8.01 
   5  -7  -2    3.91    2.09 
   5  -7  -1    6.71    3.57 
   5  -7   0    4.53    3.16 
  -5  -7   0   -0.74    2.07 
  -5  -7  -1   11.98    6.22 
   5  -7   1    7.00    3.76 
  -5  -7  -2    8.15    6.06 
   5  -7   2   10.89    5.43 
  -5  -7  -3    4.82    3.22 
   5  -7   3   -0.65    4.71 
  -5  -7  -4   -0.91    1.84 
   5  -7   4    2.59    2.61 
  -5  -7  -5    7.60    5.08 
   5  -7   5   12.08    4.14 
   5  -7   5   12.10    7.00 
  -5  -7  -6   11.03    5.76 
   5  -7   6    8.63    5.26 
   5  -7   6    9.95    2.87 
   5  -7   7    4.18    4.31 
   5  -7   7   -1.15    3.15 
  -5  -7  -7   -0.20    3.73 
  -5  -7  -8   -1.60    4.35 
   5  -7   8   -4.70    5.07 
   5  -7   9   12.76    9.75 
   5  -7  10   14.53    9.63 
   5  -7  11    3.71    6.78 
   5  -7  12   -4.91    6.55 
   5  -7  13   -3.50    8.03 
   5  -7  14    6.07    8.99 
   5  -7  15   23.07    9.88 
   5   8 -19  -17.93   10.72 
   5   8 -18    1.88    4.01 
  -5  -8  17    7.27    8.68 
   5   8 -17    9.62   10.47 
   5   8 -16   17.23    8.23 
   5   8 -15   17.40   10.82 
   5   8 -14    5.39    8.95 
   5   8 -13    5.26    6.11 
   5   8 -12   -5.59    3.14 
   5   8 -11    2.36    4.07 
   5   8 -10   13.38    7.02 
   5   8  -9   10.56    6.54 
   5   8  -8    1.05    3.15 
   5   8  -7   26.31    8.85 
   5  -8  -7   22.64    3.50 
  -5   8   7   21.94    3.54 
   5  -8  -7   19.85    2.78 
   5   8  -6   -0.14    2.31 
   5  -8  -6    2.78    1.07 
   5  -8  -5   38.42    6.62 
   5   8  -5   22.98    7.85 
   5   8  -4    7.16    4.18 
   5  -8  -4    6.83    4.41 
   5  -8  -3   -0.49    2.81 
   5   8  -3    3.87    4.77 
   5  -8  -2   30.16    7.02 
   5   8  -2   28.17    8.25 
   5  -8  -1    2.06    2.93 
   5  -8   0    3.31    2.91 
   5  -8   1    4.09    2.93 
   5  -8   2    4.51    3.85 
   5  -8   3   16.30    7.02 
  -5  -8  -4   -4.98    4.60 
   5  -8   4    4.23    2.32 
   5  -8   5   -2.79    5.66 
   5  -8   6   17.28    8.68 
   5  -8   7   11.02    7.38 
   5  -8   8    0.29    3.44 
   5  -8   9   -4.66    4.84 
   5  -8  10   -5.55    4.55 
   5  -8  11  -12.27    9.95 
   5  -8  12   -0.95    7.81 
   5  -8  13    5.07    6.77 
   5   9 -17  -14.83   11.59 
   5   9 -16  -26.72   14.59 
   5   9 -15   13.82    7.66 
   5   9 -14   -0.16   10.04 
   5   9 -13   -4.19    4.95 
   5   9 -12    3.84    2.61 
   5   9 -11    3.17    5.38 
   5   9 -10   16.34    8.79 
   5   9  -9    0.84    3.60 
   5   9  -8   -3.90    5.94 
   5   9  -7    4.23    5.93 
   5   9  -6    3.67    3.49 
   5  -9  -6   -3.96    4.01 
   5   9  -5    7.05    5.10 
   5  -9  -5    2.58    2.71 
   5  -9  -4    6.34    4.21 
   5   9  -4   11.66    6.39 
   5   9  -3    0.75    2.13 
   5  -9  -3    4.86    4.08 
   5   9  -2    0.44    3.39 
   5  -9  -2    0.99    3.96 
   5   9  -1    5.48    4.41 
   5  -9  -1    3.35    2.84 
   5  -9   0    7.04    5.10 
   5  -9   1    2.39    5.58 
   5  -9   2    8.88    6.97 
   5  -9   3    3.01    3.75 
   5  -9   4   -1.95    4.85 
   5  -9   5    0.65    2.62 
   5  -9   6   -0.44    5.20 
   5  -9   7    9.90    8.31 
   5  -9   8    4.48    3.23 
   5  -9   9    4.28    8.85 
   5  -9  10    7.03   11.98 
   5  -9  11  -10.68    5.43 
   5  -9  12    0.02    9.23 
   5  10 -15   29.72   11.91 
   5  10 -14   19.51   12.37 
   5  10 -13    7.49    6.10 
   5  10 -12  -12.52    8.63 
   5  10 -11    1.62    7.55 
   5  10 -10   13.32    7.03 
   5  10  -9   -6.47    4.99 
   5  10  -8   -1.56    3.17 
   5  10  -7   -1.75    6.43 
   5  10  -6    7.10    2.15 
   5  10  -5    0.18    4.56 
   5  10  -4    6.13    6.04 
   5 -10  -3    9.73    5.57 
   5  10  -3   -1.63    3.32 
   5  10  -2   15.34    8.17 
   5 -10  -2    9.77    2.40 
   5  10  -1    3.01    5.32 
   5 -10  -1    0.60    3.62 
   5 -10   0    5.17    2.65 
   5  10   0    7.08    5.61 
   5 -10   1    1.94    4.68 
   5 -10   2   -3.36    6.67 
   5 -10   3   15.11    8.66 
   5 -10   4    6.59    8.07 
   5 -10   5    7.29    4.95 
   5 -10   6   -1.30    6.19 
   5 -10   7    8.66    5.49 
   5 -10   8  -16.08    8.09 
   5 -10   9   -3.11    7.71 
   5 -10  10    6.01    7.10 
   5  11  -5    1.56    2.40 
   5  11  -4    6.65    2.59 
   5  11  -3   -5.27    7.27 
   5  11  -2   -3.11    6.76 
   5  11  -1    5.10    5.39 
   5 -11  -1   -7.84    4.89 
   5 -11   0   -0.01    4.56 
   5 -11   1   -4.29    5.58 
   5 -11   2    7.22   10.45 
   5 -11   3   12.89    7.81 
   5 -11   4   15.80   10.44 
   5 -11   5  -20.02   12.88 
   5 -11   6    8.40    7.91 
   5 -11   7   -2.06    4.85 
   5 -11   8    3.57    4.51 
   5 -12   3    7.49    5.02 
   5 -12   4    7.85    8.28 
   5 -12   5  -11.89   13.29 
   5 -12   6  -11.55    6.22 
  -6   0  21   -0.35    3.07 
  -6   0  20   -2.52    5.43 
  -6   0  19    0.64    3.54 
  -6   0  18   -4.18    3.91 
  -6   0  17   -1.40    3.72 
   6   0 -17    2.72    4.11 
  -6   0  16   66.67   12.40 
   6   0 -16   46.20   13.18 
   6   0 -15   -2.43    3.74 
   6   0 -14    3.27    3.30 
   6   0 -13    4.07    4.75 
   6   0 -12   25.99    8.60 
  -6   0  12   27.11    8.44 
   6   0 -11   -2.51    2.11 
  -6   0  11   -0.54    2.69 
   6   0 -10   26.87    7.67 
   6   0  -9   -0.46    1.96 
   6   0  -8   -4.05    4.10 
   6   0  -7   -5.78    4.35 
   6   0  -6   53.26    8.33 
   6   0  -5    0.61    1.48 
  -6   0   5   -2.28    2.32 
  -6   0   4  402.96   21.30 
   6   0  -4  405.71   20.17 
  -6   0   3    3.99    2.69 
  -6   0   2  316.99   19.55 
  -6   0   1    0.92    2.11 
  -6   0   0    5.30    3.61 
  -6   0  -1    1.94    2.76 
  -6   0  -2   28.57    6.53 
  -6   0  -3   -2.45    3.66 
  -6   0  -4   -4.85    5.29 
  -6   0  -5   -1.79    2.23 
   6   0   5   -1.07    3.01 
  -6   0  -6    8.56    3.27 
   6   0   6   15.35    6.29 
  -6   0  -7   -3.68    4.69 
   6   0   7    1.51    2.19 
  -6   0  -8   21.50    7.39 
   6   0   8   18.40    6.59 
   6   0   9   -1.36    2.90 
  -6   0  -9    0.08    4.73 
   6   0  10    2.83    2.35 
   6   0  11   -0.14    3.26 
   6   0  12  177.37   25.37 
   6   0  13    8.61    6.55 
   6   0  14    0.42    5.91 
   6   0  15  -12.20    8.43 
   6   0  16   17.93    9.51 
   6   0  17   15.50    8.52 
   6   0  18    5.85    7.36 
   6   0  19    1.45    6.16 
   6   0  20   12.48   10.54 
  -6  -1  23   -4.22    8.51 
  -6  -1  22    4.04    4.45 
  -6  -1  21   -0.95    7.24 
  -6  -1  20    8.67    4.10 
  -6   1  20    0.76    3.13 
  -6  -1  19   -3.71    3.96 
  -6   1  19    0.09    1.86 
  -6  -1  18    1.17    2.44 
  -6   1  18    4.23    4.59 
   6   1 -18   -1.23    4.61 
  -6  -1  17    2.45    3.77 
  -6   1  17    3.22    1.77 
   6   1 -17    0.45    5.07 
   6   1 -16   15.28    7.02 
  -6   1  16   16.59    5.81 
  -6   1  15   30.15    7.51 
   6   1 -15   22.22    8.39 
   6  -1 -15   23.62    8.99 
   6  -1 -14   13.26    6.70 
   6   1 -14   13.73    7.20 
   6   1 -13    2.35    4.14 
   6  -1 -13    2.09    2.44 
  -6   1  12    6.79    5.38 
   6   1 -12    0.10    2.98 
   6  -1 -12    5.78    4.74 
  -6   1  11    7.34    4.44 
   6   1 -11    4.82    4.65 
   6  -1 -11    5.55    3.58 
   6  -1 -10   25.59    7.26 
  -6   1  10   35.41    8.54 
   6   1 -10   31.03    8.35 
  -6   1   9    0.34    2.93 
   6  -1  -9   -1.78    1.87 
   6   1  -9    0.12    1.94 
   6   1  -8    0.75    2.62 
  -6   1   8   -2.58    3.80 
   6  -1  -8   -0.69    2.12 
  -6   1   7    3.31    2.87 
   6   1  -7    1.08    2.31 
   6  -1  -7    1.73    2.04 
  -6   1   7    0.09    1.62 
  -6   1   6   -0.08    1.22 
   6   1  -6   -2.35    2.85 
   6  -1  -6   -2.98    1.98 
  -6   1   6    0.57    1.29 
   6  -1  -5    6.63    2.90 
  -6   1   5    7.51    3.01 
   6   1  -5    3.49    2.18 
  -6   1   4    5.36    2.90 
  -6  -1   4    9.22    3.55 
   6  -1  -4    0.09    1.87 
   6  -1  -4    5.86    2.44 
  -6  -1   3   94.76   10.98 
   6  -1  -3   83.42    8.97 
  -6   1   3   89.33    9.70 
  -6  -1   2   77.44   10.41 
  -6   1   2   93.85    9.99 
  -6  -1   1  138.94   13.84 
  -6   1   1  143.05   13.69 
  -6   1   0   80.71   10.65 
  -6  -1   0   77.59    9.84 
  -6  -1  -1   13.35    4.20 
  -6   1  -1   15.45    5.28 
  -6   1  -2   34.50    8.09 
  -6  -1  -2   49.04    8.79 
   6   1   3    8.47    3.93 
  -6   1  -3    5.59    3.79 
  -6  -1  -3    6.97    3.57 
   6   1   4    9.88    4.39 
  -6  -1  -4   22.74    6.49 
  -6   1  -4   19.61    6.15 
   6   1   5    7.15    4.20 
  -6   1  -5    2.17    2.44 
  -6  -1  -5    3.70    1.64 
   6   1   6    3.49    3.99 
  -6  -1  -6   -1.37    2.76 
   6  -1   6    0.11    3.04 
  -6   1  -6   -2.73    4.12 
   6  -1   7   16.26    7.17 
  -6   1  -7   22.08    7.34 
  -6  -1  -7   25.91    7.85 
   6   1   7   12.48    5.25 
  -6   1  -8    4.92    4.01 
   6  -1   8   10.56    5.63 
  -6  -1  -8    2.74    3.29 
   6   1   8    9.84    4.76 
  -6  -1  -9   10.53    4.08 
   6  -1   9    2.55    3.85 
   6   1   9    7.13    3.58 
   6  -1  10    5.70    4.64 
   6   1  10   -4.28    3.56 
   6  -1  11    2.74    3.76 
   6   1  11   11.31    6.10 
   6  -1  12    6.29    5.04 
   6   1  12    9.07    5.35 
   6   1  13    5.69    4.86 
   6  -1  13    2.87    4.48 
   6  -1  14   -7.55    5.08 
   6   1  14   -4.62    6.11 
   6  -1  15   -5.48    6.48 
   6   1  15   -5.54    5.39 
   6   1  16   -8.02    7.12 
   6  -1  16   12.74    8.32 
   6  -1  17   -6.80    5.67 
   6   1  17    5.47    5.27 
   6  -1  18    7.47    6.90 
   6   1  18   19.12   10.76 
   6  -1  19    7.39    8.45 
   6   1  19   -7.73    9.44 
   6   1  20    6.74   11.36 
   6  -1  20  -13.74    4.29 
  -6  -2  24    7.04   10.56 
  -6  -2  23    1.05    6.61 
  -6  -2  22  -10.84    9.77 
  -6  -2  21   -4.04    6.83 
  -6  -2  20    4.75    5.84 
  -6   2  19    2.80    3.64 
  -6  -2  19    4.34    2.96 
   6   2 -19    7.04    6.23 
  -6  -2  18    3.88    5.23 
   6   2 -18   -6.69    6.82 
  -6   2  18    7.89    4.88 
  -6   2  17    7.06    2.50 
   6   2 -17    6.78    8.68 
  -6   2  16   19.41    5.19 
   6   2 -16   10.74    5.46 
   6   2 -15   11.59    6.74 
  -6   2  15   17.56    4.94 
   6   2 -14   19.60    8.55 
  -6   2  14   13.61    4.21 
   6   2 -13    0.76    3.79 
  -6   2  13   -0.96    4.49 
  -6   2  13    0.14    1.12 
   6   2 -12    1.33    2.66 
   6  -2 -12   -3.35    3.18 
  -6   2  12   -3.06    3.80 
   6   2 -11    5.62    4.81 
   6  -2 -11   -3.21    2.84 
  -6   2  11   -4.30    3.76 
  -6   2  10    0.26    2.55 
   6  -2 -10    7.76    4.20 
   6   2 -10    1.65    2.36 
  -6   2   9    6.52    3.52 
  -6   2   9    1.68    1.54 
   6   2  -9    6.66    4.68 
   6  -2  -9   -2.08    2.22 
   6  -2  -8   45.00    7.64 
   6   2  -8   37.26    8.78 
  -6   2   8   43.10    7.77 
  -6   2   8   36.66    5.29 
  -6   2   7   -0.67    1.25 
   6  -2  -7    2.68    1.88 
   6   2  -7    0.27    2.02 
  -6   2   7    1.18    1.54 
   6   2  -6   19.58    6.36 
  -6   2   6   16.42    3.84 
  -6   2   6   15.89    4.11 
   6  -2  -6   16.70    4.38 
   6  -2  -5    1.29    1.14 
  -6   2   5    2.62    2.27 
   6   2  -5   -0.22    1.80 
   6  -2  -5    1.88    1.33 
  -6   2   5    5.18    2.33 
   6  -2  -4   25.52    4.36 
   6  -2  -4   31.76    4.62 
  -6   2   4   31.12    5.48 
   6  -2  -3    6.71    2.79 
  -6  -2   3    6.61    3.42 
   6  -2  -3    2.33    1.20 
  -6   2   3    6.83    3.04 
  -6  -2   2   17.28    6.05 
  -6   2   2   16.08    3.88 
   6  -2  -2   11.59    3.02 
   6  -2  -1    3.23    2.91 
  -6  -2   1   -1.76    2.73 
  -6   2   1   -0.54    2.11 
  -6   2   0   69.96    9.97 
  -6  -2   0   75.80   10.16 
  -6   2  -1    1.40    2.69 
  -6  -2  -1   -1.13    2.67 
   6   2   1    2.50    3.05 
  -6  -2  -2   11.00    4.08 
   6   2   2    5.79    3.63 
  -6   2  -2   18.36    5.32 
   6   2   3   -0.61    2.58 
  -6   2  -3   -2.32    4.08 
  -6  -2  -3   -2.95    2.93 
   6   2   4   44.27    8.74 
  -6   2  -4   44.69    8.94 
  -6  -2  -4   48.45    9.26 
   6   2   5   14.19    5.44 
  -6   2  -5   18.34    6.16 
  -6  -2  -5   17.58    4.93 
   6   2   6   39.36    8.96 
  -6   2  -6   33.83    8.27 
  -6  -2  -6   44.30    9.68 
   6   2   7   30.93    8.66 
   6  -2   7   38.88    8.66 
  -6   2  -7   42.90   10.74 
  -6  -2  -7   37.70    9.57 
   6  -2   7   33.40    9.53 
   6  -2   8   -2.49    3.86 
   6   2   8   -6.00    5.00 
   6  -2   8   -0.21    3.68 
  -6  -2  -8   -4.04    4.40 
   6   2   9    1.31    2.49 
  -6  -2  -9    8.87    7.36 
   6  -2   9    9.07    6.13 
   6   2  10   -2.40    3.18 
  -6  -2 -10    7.08    3.67 
   6  -2  10    4.00    5.79 
   6  -2  11   13.28    7.64 
   6   2  11    8.27    4.97 
   6   2  12    0.55    3.41 
   6  -2  12   -3.33    6.29 
   6   2  13    8.82    6.30 
   6  -2  13   -2.31    3.96 
   6   2  14    8.00    4.99 
   6  -2  14   -1.74    4.35 
   6   2  15   -0.22    2.97 
   6  -2  15   10.06    9.29 
   6   2  16    5.54    5.17 
   6  -2  16    6.49    7.69 
   6   2  17   -9.02    6.21 
   6  -2  17   -1.94    8.21 
   6   2  18    8.45    3.85 
   6  -2  18   10.21    7.75 
   6  -2  19    5.33    6.53 
   6  -2  20   15.94   10.63 
  -6  -3  24   13.05   10.81 
  -6  -3  23   -3.58   10.16 
  -6  -3  22    6.97    8.29 
  -6  -3  21    4.73    6.23 
   6   3 -20   -5.10    4.11 
  -6  -3  20   -3.34    4.21 
  -6  -3  19    6.59    6.33 
   6   3 -19   -4.77    5.79 
   6   3 -18   -2.66    6.48 
  -6  -3  18   -0.51    4.39 
  -6   3  17    4.61    2.91 
   6   3 -17   -0.83    5.25 
  -6   3  16    0.16    1.65 
   6   3 -16   -1.74    2.70 
   6   3 -15    8.55    3.85 
  -6   3  15   11.95    3.04 
   6   3 -14    5.55    4.13 
  -6   3  14    4.15    2.15 
   6   3 -13   10.01    6.04 
  -6   3  13    2.67    4.82 
  -6   3  13    0.61    1.23 
  -6   3  12   -1.77    1.47 
  -6   3  12   -3.56    4.92 
   6   3 -12   -3.43    3.82 
  -6   3  12   -0.10    1.42 
  -6   3  11    0.34    1.11 
  -6   3  11    5.81    1.62 
  -6   3  11    0.76    3.90 
   6   3 -11    2.82    4.49 
  -6   3  10    2.44    1.24 
  -6  -3  10    6.24    5.74 
  -6   3  10    3.53    3.58 
   6   3 -10   -3.61    3.52 
  -6   3   9  103.65   12.26 
  -6   3   9   80.95    5.01 
   6   3  -9   84.74   14.37 
  -6   3   8   17.39    4.30 
   6   3  -8   18.21    5.61 
   6  -3  -8   19.96    4.74 
  -6   3   8   23.94    2.81 
   6  -3  -7    0.94    1.07 
  -6   3   7   -0.95    1.64 
   6   3  -7   -2.99    3.48 
  -6   3   7    1.88    0.98 
   6   3  -6    4.18    3.55 
   6  -3  -6    4.34    2.01 
  -6   3   6    2.43    1.43 
   6  -3  -6    5.54    2.59 
  -6   3   6    0.57    1.23 
   6  -3  -5    2.42    0.98 
   6   3  -5   -0.93    1.63 
  -6   3   5    7.05    2.41 
   6  -3  -5    5.50    1.58 
  -6   3   5    6.09    2.22 
   6  -3  -4    1.49    1.40 
   6  -3  -4    1.34    1.41 
  -6   3   4    2.05    2.07 
   6  -3  -3  109.30    6.17 
  -6   3   3  115.10   10.49 
   6  -3  -3   98.46    9.56 
  -6   3   2   63.53    8.38 
   6  -3  -2   63.56    8.87 
  -6  -3   2   60.58   10.21 
   6  -3  -2   57.24    4.18 
  -6   3   1   25.84    6.01 
  -6  -3   1   26.35    6.18 
   6  -3  -1   22.62    5.57 
  -6  -3   0    7.84    3.72 
  -6   3   0   11.30    4.68 
   6  -3   0    9.87    4.30 
  -6   3  -1   55.58    9.50 
  -6  -3  -1   44.55    8.43 
   6  -3   1   43.82    8.84 
  -6   3  -2    0.25    2.70 
   6   3   2    0.66    2.00 
  -6  -3  -2   -0.28    2.85 
  -6  -3  -3    0.11    2.83 
  -6   3  -3   -4.34    3.10 
   6   3   3    3.95    3.22 
   6  -3   3    2.34    1.29 
   6  -3   4    3.32    3.01 
   6   3   4    1.88    2.59 
  -6   3  -4   11.96    5.45 
  -6  -3  -4    2.55    3.27 
   6   3   5    5.90    3.67 
  -6   3  -5    2.65    3.87 
  -6  -3  -5    7.87    3.68 
   6  -3   5    4.22    2.28 
   6   3   6   57.18   10.58 
  -6   3  -6   54.93   12.51 
   6  -3   6   66.62   10.89 
  -6  -3  -6   57.24   10.98 
   6  -3   7    7.15    4.15 
   6  -3   7    4.25    6.24 
   6   3   7    5.22    3.53 
  -6  -3  -7    1.84    2.87 
   6  -3   8    1.26    2.01 
   6   3   8   -3.05    3.20 
   6  -3   8    4.98    4.57 
  -6  -3  -8   -2.67    3.31 
   6   3   9    5.63    4.73 
   6  -3   9    9.06    6.30 
  -6  -3  -9    9.39    5.11 
   6  -3  10    5.43    3.65 
   6   3  10    0.67    2.64 
   6   3  11    3.09    2.36 
   6  -3  11    8.92    6.90 
   6   3  12    0.03    2.46 
   6  -3  12   12.18    7.72 
   6   3  13    2.49    2.31 
   6  -3  13    2.93    3.15 
   6  -3  14    8.10    6.94 
   6   3  14    2.33    4.47 
   6   3  15   -8.01    6.29 
   6  -3  15   12.97   11.47 
   6   3  16    7.32    7.13 
   6  -3  16    0.32    3.93 
   6   3  17   -8.09    8.66 
   6  -3  17    2.13    4.88 
   6  -3  18   -0.24   10.30 
   6  -3  19   -5.33    5.02 
  -6  -4  23    1.49    3.66 
  -6  -4  22    0.22    5.54 
  -6  -4  21   -9.41   10.20 
   6   4 -21    5.81    5.43 
  -6  -4  20    1.17    6.48 
   6   4 -20   -3.54    7.80 
  -6  -4  19    1.20    5.39 
   6   4 -19    8.94    9.98 
   6   4 -18    0.09    2.94 
   6   4 -17    3.76    5.87 
   6   4 -16    4.92    5.21 
   6   4 -15   -2.58    4.49 
   6   4 -14   25.69    9.29 
   6   4 -13    8.62    3.88 
  -6   4  13   31.36    8.52 
   6   4 -12   -2.06    2.35 
  -6   4  12   -0.32    2.64 
   6   4 -11   -4.65    4.48 
  -6   4  11   -2.09    3.66 
  -6   4  10   48.41    9.05 
   6   4 -10   25.83    8.46 
  -6   4   9   10.81    4.07 
   6   4  -9   11.26    5.86 
   6   4  -8   65.50   12.06 
  -6   4   8   73.37    9.19 
  -6   4   7   17.29    4.15 
   6   4  -7    7.98    4.19 
   6   4  -6    5.51    4.01 
   6  -4  -6    8.00    2.06 
  -6   4   6   12.31    3.23 
   6  -4  -5    1.42    1.53 
   6   4  -5   -0.79    1.88 
   6  -4  -4   45.24    6.25 
  -6   4   4   46.76    6.31 
   6  -4  -3   19.88    4.81 
  -6   4   3   17.17    4.55 
  -6   4   2   85.76   10.35 
   6  -4  -2   89.32   10.75 
  -6  -4   1    8.22    5.54 
   6  -4  -1    8.73    4.20 
  -6   4   1    8.23    3.89 
   6  -4   0   -1.65    1.13 
  -6   4   0    0.06    3.01 
  -6  -4   0    1.23    3.47 
   6  -4   0    2.11    2.12 
   6  -4   1   -2.72    1.88 
  -6  -4  -1    1.82    3.01 
  -6   4  -1    0.08    1.57 
   6  -4   1    1.40    2.25 
   6  -4   2   11.02    2.83 
  -6  -4  -2   12.32    4.63 
  -6   4  -2    8.93    4.18 
   6  -4   2    8.68    4.06 
   6  -4   3   19.03    4.84 
  -6  -4  -3   16.71    6.87 
  -6   4  -3   14.32    5.24 
   6  -4   3   13.85    6.73 
  -6  -4  -4    2.54    3.40 
   6  -4   4    4.03    2.30 
   6   4   4    3.49    1.81 
   6  -4   4    0.64    2.46 
   6  -4   5    9.16    2.90 
   6   4   5   10.64    5.14 
   6  -4   5   10.28    5.83 
  -6  -4  -5    8.37    6.11 
   6  -4   6    7.45    4.33 
   6  -4   6    5.46    4.70 
   6   4   6    4.11    3.70 
  -6  -4  -6    6.11    3.66 
  -6  -4  -7    8.99    5.84 
   6  -4   7    3.28    3.85 
   6   4   7    9.81    5.00 
   6  -4   7   13.79    6.70 
   6   4   8    6.93    4.62 
   6  -4   8    8.62    2.00 
  -6  -4  -8    8.28    3.06 
   6  -4   8    8.48    4.06 
   6   4   9   -2.68    2.78 
   6  -4   9   -6.42    5.58 
  -6  -4  -9   -3.28    3.88 
   6   4  10   17.12    6.94 
   6  -4  10   21.22    9.16 
  -6  -4 -10   16.34    9.14 
   6   4  11    0.03    3.54 
   6  -4  11   -0.02    3.38 
   6   4  12   -7.57    3.50 
   6  -4  12    5.10    6.26 
   6  -4  13    2.79    6.69 
   6   4  13    1.57    3.79 
   6   4  14   -0.61    3.72 
   6  -4  14   -3.80    5.29 
   6   4  15   -9.54    8.63 
   6  -4  15   -4.58    4.65 
   6   4  16   -6.46    7.40 
   6  -4  16    3.49    5.33 
   6  -4  17    1.23    5.77 
   6  -4  18   -0.08    6.17 
  -6  -5  22   10.12    9.75 
  -6  -5  21  -12.71   13.44 
   6   5 -21   -5.00   10.63 
  -6  -5  20   20.12   12.84 
   6   5 -20   10.71    8.25 
  -6  -5  19    3.99    4.16 
   6   5 -19   -4.89    6.02 
   6   5 -18    6.87    5.55 
   6   5 -17    4.88    7.14 
   6   5 -16   11.05    7.02 
   6   5 -15    3.37    3.50 
   6   5 -14   17.11    7.92 
   6   5 -13    8.69    6.70 
  -6   5  13    5.90    5.08 
   6   5 -12    6.58    5.87 
  -6   5  12   -4.47    4.52 
   6   5 -11   20.67    8.87 
  -6   5  11   36.04    6.69 
  -6   5  10   35.07    7.18 
   6   5 -10   22.78    8.17 
   6   5  -9   -2.03    3.09 
  -6   5   9    1.00    1.57 
   6   5  -8    1.81    2.89 
  -6   5   8    6.64    2.66 
  -6   5   7   15.99    3.34 
   6   5  -7   21.38    7.57 
   6  -5  -6   19.74    3.37 
   6   5  -6   14.32    5.67 
  -6   5   6   17.27    3.24 
   6   5  -5    6.82    4.56 
   6  -5  -5    3.64    1.55 
   6   5  -4    6.18    3.43 
   6  -5  -4    9.58    3.17 
   6  -5  -3    5.68    2.30 
   6  -5  -2    7.86    2.99 
   6  -5  -1   20.86    5.22 
  -6  -5   1   10.07    5.26 
  -6  -5   0   -0.12    2.37 
   6  -5   0    3.69    3.18 
  -6  -5  -1   -4.03    3.16 
   6  -5   1    0.08    1.78 
   6  -5   1    2.57    1.42 
   6  -5   2   -1.00    1.20 
  -6  -5  -2   -2.32    2.75 
   6  -5   2   -1.80    3.10 
  -6  -5  -3   15.06    5.32 
   6  -5   3   17.91    6.73 
   6  -5   3   11.08    2.88 
  -6  -5  -4    3.02    2.10 
   6  -5   4    1.75    3.00 
   6  -5   4   -2.05    2.26 
  -6  -5  -5    6.65    5.18 
   6  -5   5    3.65    2.74 
   6  -5   5    2.05    4.07 
   6  -5   6   31.80    7.87 
   6  -5   6   38.22   10.75 
  -6  -5  -6   43.14    9.55 
   6  -5   7    7.49    2.89 
   6  -5   7    5.18    5.61 
  -6  -5  -7    2.62    3.56 
   6   5   8    6.09    4.85 
   6  -5   8    7.61    3.83 
   6  -5   8   -0.12    3.40 
  -6  -5  -8   -2.27    3.83 
   6   5   9    5.96    4.16 
  -6  -5  -9    6.64    4.13 
   6  -5   9    6.64    6.02 
   6   5  10    3.09    4.09 
   6  -5  10   12.56    7.31 
  -6  -5 -10   -1.43    5.02 
   6   5  11    3.89    2.20 
   6  -5  11    3.50    4.78 
   6   5  12    4.23    4.97 
   6  -5  12   -3.48    4.34 
   6   5  13    6.76    5.53 
   6  -5  13    1.77    3.94 
   6   5  14    6.15    3.18 
   6  -5  14   -4.94    4.97 
   6  -5  15    3.36    5.52 
   6  -5  16   -5.48   10.52 
   6  -5  17   18.06   13.48 
  -6  -6  20  -13.10   10.52 
   6   6 -20  -14.96   10.53 
  -6  -6  19   -7.64    4.41 
   6   6 -19    4.20    4.07 
   6   6 -18    2.07    5.63 
   6   6 -17    2.49    6.49 
   6   6 -16   -0.25    6.39 
   6   6 -15    3.89    7.16 
   6   6 -14    6.12    6.92 
   6   6 -13    1.37    4.61 
  -6   6  13   -1.44    2.67 
   6   6 -12    0.74    4.61 
  -6   6  12    0.64    3.10 
   6   6 -11   13.81    6.55 
  -6   6  11   17.75    5.07 
  -6   6  10   42.04    7.54 
   6   6 -10   39.91   11.65 
  -6   6   9    2.45    1.15 
   6   6  -9    7.10    4.96 
   6   6  -8   24.51    7.66 
  -6   6   8   25.29    4.88 
   6   6  -7    5.39    3.14 
  -6   6   7    6.66    2.34 
   6   6  -6    3.71    4.58 
   6  -6  -6   -1.61    1.01 
   6   6  -5    4.61    2.10 
   6  -6  -5    7.38    2.78 
   6   6  -4   12.03    5.18 
   6  -6  -4   17.55    4.44 
   6  -6  -3    0.03    2.03 
   6  -6  -2    8.29    3.48 
  -6  -6   1   -3.89    6.15 
   6  -6  -1   -0.69    2.00 
  -6  -6   0   24.08    7.03 
   6  -6   0   32.98    8.15 
   6  -6   1   17.75    6.62 
  -6  -6  -1   22.96    7.59 
  -6  -6  -2   -1.99    4.30 
   6  -6   2    2.91    3.63 
   6  -6   3   51.83    6.47 
  -6  -6  -3   45.74   11.34 
   6  -6   3   43.03   10.75 
  -6  -6  -4    5.76    3.52 
   6  -6   4    0.83    1.86 
   6  -6   4    3.36    3.55 
  -6  -6  -5    2.69    4.42 
   6  -6   5    4.01    2.37 
   6  -6   5    3.06    1.84 
  -6  -6  -6  118.47   17.66 
   6  -6   6  126.46   20.34 
   6  -6   6  128.61   14.49 
   6  -6   7    4.66    3.65 
  -6  -6  -7    1.16    1.95 
   6  -6   7    8.04    4.09 
   6  -6   8   11.36    7.07 
  -6  -6  -8   -0.21    4.16 
   6  -6   9   -4.51    6.12 
   6  -6  10    5.75    6.00 
   6  -6  11    5.25    3.81 
   6  -6  12   -5.01    5.20 
   6  -6  13   -7.85    3.99 
   6  -6  14    1.65    4.57 
   6  -6  15   -9.66    9.13 
   6  -6  16    3.65    4.79 
  -6  -7  19    9.49    9.79 
   6   7 -19    4.78    5.66 
   6   7 -18    0.59    5.90 
   6   7 -17   10.85    8.65 
   6   7 -16   14.32   10.68 
   6   7 -15   10.89    5.27 
   6   7 -14    9.76    6.88 
   6   7 -13   -3.74    8.03 
   6   7 -12   -2.03    2.80 
  -6   7  11    2.26    3.83 
   6   7 -11   -6.30    6.80 
   6   7 -10   10.23    5.75 
  -6   7  10   19.35    4.75 
  -6   7   9   12.34    4.05 
   6   7  -9    4.48    3.67 
   6   7  -8   17.94    7.23 
  -6   7   8   13.68    3.37 
   6  -7  -7   11.31    2.46 
   6   7  -7    8.04    3.98 
  -6   7   7    8.58    1.96 
   6  -7  -6   32.09    5.07 
   6   7  -6   31.20    8.69 
   6  -7  -5    0.74    1.81 
   6   7  -5    1.95    2.40 
   6   7  -4    6.80    4.06 
   6  -7  -4    8.10    4.02 
   6   7  -3    7.58    4.87 
   6  -7  -3    6.69    3.82 
   6  -7  -2   15.07    5.32 
   6  -7  -1    9.48    4.82 
   6  -7   0   17.75    7.11 
   6  -7   1   40.45    9.88 
  -6  -7  -2    2.30    3.62 
   6  -7   2    5.11    4.68 
  -6  -7  -3   87.59   17.06 
   6  -7   3   86.88   15.56 
  -6  -7  -4    3.46    2.25 
   6  -7   4   -2.28    2.80 
   6  -7   5    0.44    2.51 
   6  -7   5    4.39    5.52 
  -6  -7  -5   -2.34    4.04 
  -6  -7  -6    1.39    3.46 
   6  -7   6    6.44    3.94 
   6  -7   6    6.30    6.84 
   6  -7   7    2.69    5.69 
   6  -7   8    8.55    6.11 
   6  -7   9    6.25    7.59 
   6  -7  10   -4.73    6.70 
   6  -7  11    6.27    4.97 
   6  -7  12    9.95    5.52 
   6  -7  13   -3.82    8.15 
   6  -7  14    5.66    6.64 
   6   8 -18   15.06   12.04 
   6   8 -17   31.31   13.12 
   6   8 -16   -1.40    6.70 
   6   8 -15  -11.26    8.58 
   6   8 -14    9.43    4.42 
   6   8 -13   -0.13    2.65 
   6   8 -12   10.91    7.57 
   6   8 -11   -8.03    7.67 
   6   8 -10    5.52    3.79 
   6   8  -9    4.43    4.40 
   6   8  -8    4.10    5.73 
   6   8  -7   27.89   10.29 
   6  -8  -7   28.33    4.51 
   6   8  -6    6.76    3.21 
   6  -8  -6   15.15    3.71 
   6   8  -5    9.19    5.90 
   6  -8  -5   11.94    4.85 
   6  -8  -4   -1.43    2.91 
   6   8  -4   -1.63    4.93 
   6  -8  -3    4.36    3.86 
   6   8  -3   -2.59    2.75 
   6  -8  -2   11.09    4.74 
   6  -8  -1   -0.82    3.44 
   6  -8   0   -3.41    4.17 
   6  -8   1    5.44    4.98 
   6  -8   2   -2.17    3.66 
   6  -8   3    6.80    5.26 
   6  -8   4   13.24    8.23 
   6  -8   5   16.85    7.70 
   6  -8   6    9.60    7.21 
   6  -8   7    1.29    4.02 
   6  -8   8    0.41    3.75 
   6  -8   9   -9.46    8.83 
   6  -8  10   13.37    8.09 
   6  -8  11   -4.30    7.16 
   6  -8  12    2.44    5.26 
   6  -8  13   -6.12    7.76 
   6   9 -17    6.16    8.79 
   6   9 -16   16.78    6.49 
   6   9 -15    5.17    8.70 
   6   9 -14   -1.49    4.52 
   6   9 -13    2.89    3.98 
   6   9 -12    3.34    3.76 
   6   9 -11    3.68    4.19 
   6   9 -10    7.50    6.07 
   6   9  -9   -7.25    7.10 
   6   9  -8   -7.10    4.59 
   6   9  -7   10.01    7.00 
   6   9  -6    3.62    5.43 
   6  -9  -5   10.32    4.05 
   6   9  -5   13.94    6.89 
   6   9  -4   -3.36    3.81 
   6  -9  -4   -1.96    2.36 
   6  -9  -3    7.20    2.50 
   6   9  -3    6.68    5.72 
   6   9  -2   -0.82    3.91 
   6  -9  -2    0.78    4.63 
   6  -9  -1   -2.74    4.64 
   6  -9   0    0.31    2.53 
   6  -9   1   -1.52    3.08 
   6  -9   2   11.53    7.32 
   6  -9   3    1.03    6.53 
   6  -9   4    2.85    5.28 
   6  -9   5    7.53    5.29 
   6  -9   6  -10.41    9.43 
   6  -9   7   15.36    9.00 
   6  -9   8  -11.43   11.85 
   6  -9   9   10.93    8.28 
   6  -9  10    4.53    8.99 
   6  -9  11    9.48   13.18 
   6  10 -15   34.60   15.07 
   6  10 -14   -7.78    9.60 
   6  10 -13   14.27    7.60 
   6  10 -12   -2.42    3.44 
   6  10 -11   -4.74    6.61 
   6  10 -10    3.50    2.72 
   6  10  -9    0.45    5.32 
   6  10  -8   -3.17    4.15 
   6  10  -7   -6.03    8.25 
   6  10  -6   -2.91    5.70 
   6  10  -5   -3.66    6.89 
   6  10  -4    4.75    2.53 
   6  10  -3    8.96    8.21 
   6 -10  -3    0.58    2.64 
   6 -10  -2    0.37    2.95 
   6  10  -2    1.48    2.75 
   6 -10  -1    3.64    4.99 
   6  10  -1   -3.23    5.92 
   6 -10   0   -5.48    7.03 
   6 -10   1   -5.45    5.87 
   6 -10   2    5.59    5.84 
   6 -10   3    4.60    5.26 
   6 -10   4    8.41    6.95 
   6 -10   5    9.96    7.40 
   6 -10   6    9.06    7.65 
   6 -10   7   20.02   10.23 
   6 -10   8   -8.26    7.07 
   6 -10   9    7.28    6.82 
   6  11  -9   -0.39    6.70 
   6  11  -8   23.28   12.26 
   6  11  -7    8.09    5.79 
   6  11  -6    7.02    6.92 
   6  11  -5   -8.05    6.29 
   6  11  -4    3.19    4.86 
   6  11  -3    5.64    3.13 
   6  11  -2  -10.05    6.87 
   6  11  -1   -1.47    7.00 
   6  11   0   -5.49    6.47 
   6 -11   0    5.10    6.98 
   6  11   1   -1.27    5.16 
   6 -11   1   10.91    6.00 
   6 -11   2   -0.33    3.56 
   6 -11   3    4.20    3.00 
   6 -11   4   -3.11    3.53 
   6 -11   5   18.38   12.36 
   6 -11   6   -8.03   10.42 
   6 -11   7   21.15   12.90 
   6 -12   3   -1.11    7.18 
   6 -12   4   18.51    7.78 
  -7   0  21   -9.20    6.26 
  -7   0  20    4.58    3.53 
  -7   0  19   -1.02    3.04 
   7   0 -18   -2.03    3.42 
  -7   0  18    3.27    2.94 
  -7   0  17    7.88    3.29 
   7   0 -17    2.23    3.99 
   7   0 -16   40.91   11.90 
   7   0 -15   10.13    6.75 
   7   0 -14   63.84   14.15 
   7   0 -13    2.29    3.75 
   7   0 -12   14.38    6.49 
  -7   0  12   17.77    6.56 
   7   0 -11   -0.62    3.06 
  -7   0  11   -4.21    4.47 
  -7   0  10   10.85    5.11 
   7   0 -10    2.29    2.80 
  -7   0   9   -2.20    3.89 
   7   0  -9    4.06    3.31 
   7   0  -8   80.70   11.85 
   7   0  -7   -8.19    3.62 
  -7   0   6   -1.91    3.62 
   7   0  -6    2.20    1.54 
  -7   0   5    0.85    1.38 
   7   0  -5   -0.81    2.66 
  -7   0   4    3.25    2.77 
  -7   0   3    4.38    2.41 
  -7   0   2  263.19   18.56 
  -7   0   1    0.51    2.19 
  -7   0   0  225.11   18.62 
  -7   0  -1    1.83    2.86 
  -7   0  -2   12.22    4.90 
  -7   0  -3   -6.17    5.31 
  -7   0  -4   40.09    9.61 
  -7   0  -5    1.37    2.24 
   7   0   5    2.40    2.00 
  -7   0  -6   19.64    7.74 
   7   0   6   15.54    5.87 
   7   0   7    1.09    2.12 
  -7   0  -7    8.08    4.96 
   7   0   8   19.97    7.58 
   7   0   9    4.38    4.68 
   7   0  10    0.15    2.83 
   7   0  11    4.09    2.82 
   7   0  12    3.71    5.31 
   7   0  13   -3.85    3.37 
   7   0  14   -7.04    6.70 
   7   0  15    0.42    2.99 
   7   0  16   -5.05    5.78 
   7   0  17   -6.86    5.85 
   7   0  18   -2.03    5.41 
   7   0  19  -15.68   13.09 
   7   0  20    1.28    5.53 
  -7  -1  23    1.11    3.49 
  -7  -1  22    4.74    4.66 
  -7  -1  21   -3.41    6.79 
  -7  -1  20   -2.11    3.34 
  -7   1  20    2.72    3.54 
   7   1 -19   -0.04    4.55 
  -7   1  19    1.75    3.61 
  -7  -1  19    7.08    3.28 
  -7   1  18    1.06    1.74 
   7   1 -18    0.85    2.80 
   7   1 -17   -4.19    3.13 
  -7   1  17   -7.33    5.60 
  -7   1  16   26.24    7.40 
   7  -1 -16   11.27    6.38 
   7   1 -16   10.41    7.30 
   7   1 -15    1.97    4.32 
   7  -1 -15    6.91    3.42 
   7   1 -14   -1.79    4.72 
   7  -1 -14   -0.23    2.14 
   7   1 -13    2.57    3.47 
   7  -1 -13   -0.68    2.30 
   7  -1 -12    3.80    2.72 
   7   1 -12    1.05    2.26 
  -7   1  12   -1.90    2.33 
   7  -1 -11    6.64    2.39 
  -7   1  11   -2.32    3.56 
   7   1 -11    7.84    4.96 
  -7   1  10   24.43    7.57 
   7  -1 -10   20.74    6.83 
   7   1 -10   31.69    8.62 
   7   1  -9   18.94    6.44 
   7  -1  -9   21.47    6.06 
  -7   1   9   27.06    7.26 
   7   1  -8    1.12    1.93 
  -7   1   8   -1.23    1.49 
   7  -1  -8   -1.22    2.82 
  -7   1   7   37.39    7.22 
  -7   1   7   36.84    6.34 
   7  -1  -7   34.19    7.02 
   7   1  -7   38.60    8.06 
  -7   1   6   70.87    9.22 
   7   1  -6   75.28   11.20 
   7  -1  -6   78.68   10.02 
  -7   1   5    8.94    3.45 
  -7  -1   5    4.57    4.07 
   7  -1  -5    0.68    1.94 
   7   1  -5   -0.62    2.27 
   7  -1  -5    2.81    2.81 
   7  -1  -4    3.99    2.67 
  -7   1   4    5.67    2.45 
   7  -1  -4    5.97    3.67 
  -7  -1   4    4.49    3.40 
  -7   1   3  483.60   23.95 
  -7  -1   3  506.15   27.02 
   7  -1  -3  501.37   24.32 
  -7  -1   2    2.35    2.79 
  -7   1   2    2.54    2.49 
  -7   1   1   55.00    9.19 
  -7  -1   1   62.10    9.70 
  -7  -1   0    8.05    3.74 
  -7   1   0   10.43    3.99 
  -7   1  -1   11.89    5.64 
  -7  -1  -1    5.09    2.70 
  -7   1  -2    2.16    3.71 
  -7  -1  -2    2.09    3.13 
   7   1   3   11.72    4.89 
  -7   1  -3   10.85    5.01 
  -7  -1  -3    8.78    4.15 
   7   1   4   -3.06    2.88 
  -7   1  -4   -0.75    3.39 
  -7  -1  -4    1.86    3.75 
   7   1   5   -2.84    3.80 
  -7   1  -5   -0.06    3.68 
  -7  -1  -5   -0.79    1.80 
   7   1   6   12.88    5.71 
  -7   1  -6   20.48    7.18 
   7  -1   6   15.67    6.17 
  -7  -1  -6    8.13    2.32 
   7   1   7   14.47    7.24 
  -7   1  -7   22.26    8.23 
  -7  -1  -7    9.54    4.50 
   7  -1   7   16.74    7.12 
  -7  -1  -8    5.15    4.59 
   7   1   8    2.86    2.36 
   7  -1   8   -2.42    3.54 
   7  -1   9    0.97    3.82 
   7   1   9    4.02    2.41 
   7  -1  10   10.57    5.01 
   7   1  10    9.99    6.43 
   7  -1  11  128.96   21.64 
   7   1  11  103.93   18.57 
   7  -1  12   -6.20    3.77 
   7   1  12   -2.81    5.07 
   7  -1  13   -5.20    5.46 
   7   1  13   -0.07    5.67 
   7  -1  14    9.25    6.36 
   7   1  14   13.82    8.16 
   7  -1  15   16.16    9.96 
   7   1  15    0.11    4.22 
   7  -1  16   -3.51    6.58 
   7   1  16   -1.50    2.93 
   7  -1  17    0.08    7.96 
   7   1  17   -7.78    8.69 
   7   1  18  -13.88    8.79 
   7  -1  18   -2.04    8.33 
   7   1  19   24.63   13.31 
   7  -1  19   -0.88    3.68 
  -7  -2  24    2.32    7.85 
  -7  -2  23    0.32    5.96 
  -7  -2  22    1.51    5.18 
  -7  -2  21   -2.08    3.49 
  -7  -2  20   -2.08    3.13 
   7   2 -20    7.21    4.78 
  -7  -2  19   -1.38    5.67 
  -7   2  19   -5.64    4.90 
   7   2 -19   -6.63    8.18 
  -7   2  18   -0.43    2.81 
   7   2 -18    3.09    4.05 
  -7   2  17    1.20    3.38 
   7   2 -17   -3.32    6.16 
   7   2 -16   19.88   10.49 
  -7   2  16    9.90    4.21 
   7   2 -15   37.87   12.17 
  -7   2  15   40.38    7.18 
   7   2 -14    3.35    3.70 
   7  -2 -14    3.29    5.28 
  -7   2  13   -5.09    3.61 
   7   2 -13    3.25    3.81 
   7  -2 -13    3.26    4.40 
  -7   2  12    1.30    1.92 
   7   2 -12    0.80    2.68 
   7  -2 -12    1.82    2.74 
  -7   2  11    1.72    2.25 
  -7   2  11   -3.40    2.30 
   7   2 -11   -4.50    4.03 
   7  -2 -11    5.01    3.51 
  -7   2  10  107.74   13.80 
  -7   2  10   78.52    9.61 
   7  -2 -10  106.28   13.76 
   7   2 -10  100.88   15.98 
   7   2  -9   -1.24    3.19 
   7  -2  -9    5.21    3.47 
  -7   2   9    3.02    1.49 
  -7   2   9    3.75    1.67 
  -7   2   8   21.51    5.82 
  -7   2   8   18.57    4.03 
   7  -2  -8   22.49    5.61 
   7   2  -8   27.07    7.08 
  -7   2   7    0.37    1.61 
   7   2  -7   -0.94    3.06 
   7  -2  -7    0.07    1.17 
  -7   2   7   -0.95    2.84 
  -7   2   6    0.60    1.31 
   7   2  -6    4.43    3.33 
   7  -2  -6    0.76    2.19 
   7  -2  -5   -1.97    1.12 
   7  -2  -5   -0.15    1.31 
   7   2  -5    1.63    1.86 
  -7   2   5   -3.23    2.64 
   7  -2  -4   17.99    3.66 
   7  -2  -4   16.35    4.33 
  -7  -2   4   20.03    6.02 
  -7   2   4   23.54    5.12 
   7  -2  -3    5.22    3.61 
  -7  -2   3    8.49    4.07 
  -7   2   3    5.34    3.21 
   7  -2  -2   -1.54    1.51 
  -7   2   2    0.45    2.94 
  -7  -2   2   -4.08    4.93 
  -7  -2   1   32.63    7.38 
  -7   2   1   33.61    7.10 
   7  -2  -1   34.68    7.56 
  -7  -2   0    6.77    2.93 
  -7   2   0   13.15    5.18 
  -7  -2  -1    1.85    2.83 
   7   2   1   -4.29    3.10 
  -7   2  -1    6.39    4.63 
  -7  -2  -2   51.95    9.71 
   7   2   2   45.91    9.28 
  -7   2  -2   55.67   10.30 
   7   2   3    3.93    3.25 
  -7   2  -3   -2.41    4.07 
  -7  -2  -3   -1.66    1.94 
   7   2   4   11.23    4.74 
  -7   2  -4   17.26    7.10 
  -7  -2  -4   22.31    6.43 
  -7  -2  -5   66.55   11.85 
   7   2   5   60.30   11.40 
  -7   2  -5   72.99   13.23 
   7   2   6    9.90    5.93 
  -7   2  -6   16.24    6.19 
  -7  -2  -6    9.64    4.82 
   7  -2   6   15.89    7.06 
   7   2   7    0.06    3.55 
  -7  -2  -7   -0.23    3.60 
   7  -2   7    2.44    3.36 
   7   2   8   -4.91    4.66 
  -7  -2  -8    7.78    4.41 
   7  -2   8   -3.15    3.17 
   7  -2   8    2.70    4.11 
   7   2   9   -7.11    5.07 
   7  -2   9    3.93    2.39 
   7   2  10   11.10    7.02 
   7  -2  10    5.27    4.30 
   7   2  11    2.75    3.39 
   7  -2  11    3.47    5.03 
   7   2  12   17.29    7.99 
   7  -2  12   34.33   12.12 
   7   2  13   -2.27    2.29 
   7  -2  13    6.32    3.11 
   7   2  14    4.12    5.11 
   7  -2  14    6.49    7.57 
   7   2  15   -3.67    5.49 
   7  -2  15   -9.66    9.54 
   7   2  16   -2.15    5.12 
   7  -2  16   -0.53    3.87 
   7   2  17   -4.48    7.30 
   7  -2  17  -12.17    8.75 
   7   2  18    7.86    9.19 
   7  -2  18   -6.71    6.54 
   7  -2  19   -4.77    5.86 
  -7  -3  24    5.77    6.22 
  -7  -3  23    8.12   10.24 
  -7  -3  22    1.44    3.09 
   7   3 -21    7.97    4.58 
  -7  -3  21   -2.62    4.73 
  -7  -3  20   14.95    9.21 
   7   3 -20   -6.74    9.23 
   7   3 -19    8.03    5.10 
   7   3 -18   11.53    6.71 
  -7   3  17   -0.46    2.23 
   7   3 -17    4.82    5.67 
   7   3 -16   14.82    8.90 
  -7   3  16   15.81    4.04 
   7   3 -15    2.44    5.18 
  -7   3  15    0.49    2.33 
  -7   3  15    2.95    1.20 
   7   3 -14    1.47    2.17 
  -7   3  14    1.04    1.20 
  -7   3  14    0.84    1.64 
  -7   3  13   10.24    5.52 
  -7   3  13    2.90    2.04 
   7   3 -13   -1.48    3.75 
  -7   3  13    7.90    2.55 
  -7   3  12    4.05    4.31 
  -7   3  12   -1.20    0.73 
   7   3 -12   -0.74    2.57 
  -7   3  12   -0.30    1.53 
  -7   3  11   -0.99    1.12 
  -7   3  11    2.39    2.01 
   7   3 -11    6.19    4.84 
   7  -3 -11    1.19    2.33 
  -7   3  10    3.20    2.29 
   7  -3 -10    6.18    2.42 
   7   3 -10    6.20    4.69 
  -7  -3  10   -0.04    3.34 
  -7   3  10    3.54    1.47 
   7   3  -9   23.22    7.84 
  -7   3   9   20.53    5.75 
   7  -3  -9   22.75    5.91 
  -7   3   9   21.11    3.43 
   7   3  -8   19.37    7.06 
  -7   3   8   14.33    3.03 
  -7   3   8   14.67    4.37 
   7  -3  -8   16.78    4.83 
  -7   3   7   29.70    4.57 
  -7   3   7   22.33    4.91 
   7   3  -7   20.15    6.67 
   7  -3  -7   22.02    4.74 
   7  -3  -6   16.83    4.08 
   7  -3  -6   14.31    3.61 
  -7   3   6   17.42    3.62 
   7   3  -6   14.49    5.01 
  -7   3   5   36.24    5.71 
   7   3  -5   39.90    9.15 
   7  -3  -5   38.26    5.78 
   7  -3  -5   37.01    5.07 
   7  -3  -4    4.26    2.21 
   7  -3  -4    2.64    1.37 
  -7   3   4    3.50    2.37 
  -7  -3   3    1.96    3.71 
   7  -3  -3    3.96    1.97 
  -7   3   3    0.90    1.68 
   7  -3  -3    6.22    2.83 
  -7  -3   2    7.93    4.20 
  -7   3   2    7.21    3.18 
   7  -3  -2    3.92    1.86 
   7  -3  -1   20.06    5.61 
  -7  -3   1   18.93    5.66 
  -7   3   1   25.00    6.14 
  -7  -3   0    2.50    2.25 
  -7   3   0   -2.00    2.68 
   7  -3   0    2.52    3.12 
  -7  -3  -1    0.72    2.98 
  -7   3  -1   -0.48    1.68 
   7   3   1    2.30    2.66 
   7  -3   1    4.81    3.34 
  -7  -3  -2    3.21    2.46 
  -7   3  -2    1.80    2.60 
   7   3   2    8.95    4.42 
  -7  -3  -3   53.55   10.26 
   7   3   3   41.61    9.32 
  -7   3  -3   45.17    9.97 
   7   3   4   29.42    8.22 
  -7   3  -4   34.21    9.31 
  -7  -3  -4   27.95    8.49 
   7   3   5   64.26   11.58 
  -7   3  -5   74.12   14.16 
  -7  -3  -5   70.73   12.34 
   7  -3   5   72.02   10.96 
   7  -3   6    7.70    3.76 
   7   3   6   -5.72    4.56 
   7  -3   6    3.05    4.73 
  -7  -3  -6    3.59    2.91 
   7  -3   7   -3.78    3.41 
   7   3   7   -0.52    2.43 
   7  -3   7   -1.74    2.77 
  -7  -3  -7    3.38    6.07 
   7  -3   8    0.30    3.01 
   7   3   8    0.47    2.49 
  -7  -3  -8    0.52    3.68 
   7  -3   8   -0.51    1.94 
   7   3   9    2.13    3.19 
   7  -3   9   -0.53    3.75 
   7   3  10   -6.38    5.77 
   7  -3  10    1.05    3.95 
   7   3  11    7.00    5.37 
   7  -3  11   13.99    8.16 
   7   3  12   -1.00    4.14 
   7  -3  12    1.94    3.99 
   7   3  13    3.60    3.49 
   7  -3  13   12.49    9.26 
   7   3  14    7.37    3.65 
   7  -3  14   -3.50    2.82 
   7   3  15   -1.68    3.71 
   7  -3  15   -4.19    3.80 
   7   3  16  -18.41    8.25 
   7  -3  16    5.10    8.51 
   7   3  17   -5.16    2.94 
   7  -3  17   21.16   13.68 
   7  -3  18    1.09    5.50 
  -7  -4  23    6.81    9.11 
  -7  -4  22    9.22    9.42 
   7   4 -22   -2.30    5.56 
  -7  -4  21    1.51    4.64 
   7   4 -21  -11.08    8.11 
  -7  -4  20   11.27    9.09 
   7   4 -20   15.32   10.13 
   7   4 -19    8.47    9.52 
   7   4 -18   -0.24    3.83 
   7   4 -17   -0.38    4.14 
   7   4 -16    5.87    4.05 
   7   4 -15   -8.26    6.99 
   7   4 -14    1.75    2.83 
   7   4 -13    7.37    6.31 
  -7   4  13   10.62    6.78 
  -7   4  12   11.44    2.00 
   7   4 -12    4.91    4.35 
  -7   4  11   16.11    6.37 
   7   4 -11   12.92    5.81 
  -7   4  10    0.77    1.85 
   7   4 -10   -3.61    3.49 
   7   4  -9   10.38    5.00 
  -7   4   9    9.87    3.39 
  -7   4   8   78.47    9.24 
   7   4  -8   77.47   13.77 
   7   4  -7    4.85    3.93 
  -7   4   7    7.89    2.53 
  -7   4   7    6.98    2.02 
   7   4  -6   12.40    5.05 
   7  -4  -6    6.63    2.57 
  -7   4   6    8.90    2.39 
   7  -4  -5   19.14    4.18 
  -7   4   5   14.00    3.13 
   7   4  -5   18.46    6.48 
  -7   4   4   39.12    6.42 
   7  -4  -4   32.64    6.25 
  -7   4   3   -0.36    1.82 
   7  -4  -3    0.91    1.93 
  -7   4   2   17.85    4.50 
  -7  -4   2   21.18    7.31 
   7  -4  -2   18.09    5.81 
  -7   4   1    2.15    2.87 
  -7  -4   1   -0.25    2.56 
   7  -4  -1    2.14    0.92 
   7  -4  -1    0.10    2.06 
  -7   4   0   55.62    9.76 
   7  -4   0   58.56   10.60 
  -7  -4   0   55.83   10.66 
   7  -4   0   57.05    5.56 
  -7  -4  -1   26.43    8.36 
  -7   4  -1   19.96    5.91 
   7  -4   1   25.16    7.39 
   7  -4   1   24.19    4.35 
  -7  -4  -2   12.04    5.38 
  -7   4  -2    6.20    4.54 
   7  -4   2    8.49    4.06 
   7  -4   2    7.55    2.82 
  -7  -4  -3    2.79    1.58 
   7  -4   3    5.56    5.12 
  -7   4  -3    0.37    2.96 
   7  -4   3    5.96    3.40 
  -7  -4  -4   10.23    5.19 
   7  -4   4   18.47    8.16 
  -7   4  -4   19.47    7.27 
   7   4   4   12.50    5.44 
   7  -4   4   14.00    3.92 
   7   4   5    7.72    4.66 
   7  -4   5    8.46    5.09 
  -7  -4  -5    6.83    5.09 
   7  -4   5    6.33    3.27 
   7  -4   6    0.84    3.56 
   7   4   6   -2.20    3.24 
   7  -4   6   -2.99    4.48 
  -7  -4  -6   -3.68    4.54 
   7  -4   7    8.09    2.61 
   7   4   7    8.47    4.12 
  -7  -4  -7   21.42    7.85 
   7  -4   7   16.65    8.11 
   7  -4   8   -0.52    3.01 
   7   4   8   -1.24    4.64 
   7  -4   8    0.04    4.14 
  -7  -4  -8   -1.25    5.09 
   7   4   9   -1.83    2.61 
   7  -4   9    0.40    2.65 
   7   4  10   -1.86    4.61 
   7  -4  10   13.78    6.95 
   7   4  11    3.62    5.75 
   7  -4  11   15.26    7.19 
   7  -4  12    1.70    5.99 
   7   4  12   -7.20    5.78 
   7   4  13   -2.15    3.57 
   7  -4  13   -6.86    9.73 
   7   4  14    2.57    4.14 
   7  -4  14    2.12    3.60 
   7   4  15    6.89    7.46 
   7  -4  15   28.66   12.32 
   7  -4  16   10.80    8.11 
   7  -4  17   -2.82    9.87 
  -7  -5  22    9.33    9.42 
  -7  -5  21  -14.58    8.75 
   7   5 -21    6.87    8.81 
   7   5 -20   19.42   11.76 
  -7  -5  20    0.21    5.62 
   7   5 -19    2.64    4.62 
   7   5 -18   -8.32    4.60 
   7   5 -17    2.79    6.44 
   7   5 -16   11.85    7.40 
   7   5 -15   -0.32    4.03 
   7   5 -14    3.70    6.39 
   7   5 -13   -3.40    5.25 
  -7   5  13    3.93    2.90 
   7   5 -12    3.16    4.27 
  -7   5  12    7.07    4.49 
   7   5 -11    0.98    3.54 
  -7   5  11   -2.23    1.93 
  -7   5  10    4.27    3.49 
   7   5 -10   -4.39    4.06 
   7   5  -9    5.44    4.26 
  -7   5   9   11.43    4.04 
  -7   5   8   21.90    4.48 
   7   5  -8   29.81    8.76 
   7  -5  -7    3.16    1.90 
  -7   5   7    3.53    1.67 
   7   5  -7    7.32    4.66 
   7  -5  -6    3.15    1.80 
   7   5  -6   -3.14    4.08 
   7   5  -5   35.33   10.12 
   7  -5  -5   43.40    6.54 
   7  -5  -4    2.77    1.43 
   7  -5  -3    5.04    3.22 
  -7  -5   2   -0.41    3.38 
   7  -5  -2    4.09    3.41 
  -7  -5   1   32.60    9.23 
   7  -5  -1   33.53    7.80 
  -7  -5   0    8.02    3.97 
   7  -5   0    9.75    4.61 
  -7  -5  -1   -1.21    3.42 
   7  -5   1    0.65    1.09 
   7  -5   1   -0.91    3.73 
   7  -5   2   -3.42    2.97 
  -7  -5  -2   -1.40    1.79 
   7  -5   2    0.82    1.72 
  -7  -5  -3   14.32    5.88 
   7  -5   3   14.60    3.83 
   7  -5   3   16.47    6.59 
  -7  -5  -4    0.69    3.15 
   7  -5   4    5.62    1.89 
   7  -5   4    6.75    4.61 
   7  -5   5   42.15    8.46 
  -7  -5  -5   53.56   11.12 
   7  -5   5   33.88   10.58 
   7  -5   6    1.75    4.07 
   7  -5   6    0.24    3.80 
  -7  -5  -6   -2.38    4.60 
   7  -5   7   -5.10    3.66 
   7   5   7    4.87    3.81 
   7  -5   7   -2.39    4.99 
  -7  -5  -7    7.65    5.45 
   7  -5   8   13.08    6.07 
   7   5   8   14.51    6.37 
   7  -5   8   13.49    6.68 
  -7  -5  -8   22.08   10.06 
   7   5   9    2.02    3.60 
   7  -5   9    0.05    2.57 
   7   5  10   -1.86    4.26 
   7  -5  10   -6.57    8.06 
   7   5  11   -1.09    2.53 
   7  -5  11    5.45    6.51 
   7   5  12    1.47    2.24 
   7  -5  12    5.44    4.31 
   7   5  13    1.66    3.60 
   7  -5  13    4.35    8.41 
   7   5  14   -2.59    5.22 
   7  -5  14   -3.95    8.85 
   7  -5  15    3.72   11.14 
   7  -5  16   12.09    5.30 
  -7  -6  20    8.96    9.65 
   7   6 -20   10.40    9.59 
   7   6 -19   -4.55    7.84 
   7   6 -18   -0.63    4.60 
   7   6 -17   -0.75    5.76 
   7   6 -16    1.69    5.90 
   7   6 -15    8.12    8.44 
   7   6 -14   -9.28    5.32 
   7   6 -13   15.06    7.94 
  -7   6  13    0.33    3.35 
   7   6 -12    1.29    3.19 
  -7   6  12   -3.28    3.64 
   7   6 -11   29.11   10.00 
  -7   6  11   19.96    6.28 
  -7   6  10    6.80    2.51 
   7   6 -10    3.57    2.87 
   7   6  -9    0.59    3.02 
  -7   6   9    3.21    3.22 
   7   6  -8   16.13    7.50 
  -7   6   8   16.21    3.27 
   7  -6  -7    0.47    0.66 
   7   6  -7    6.60    4.90 
   7   6  -6    7.26    4.92 
   7  -6  -6   16.89    4.15 
   7   6  -5    1.84    3.21 
   7  -6  -5    8.49    3.24 
   7   6  -4   -1.08    3.44 
   7  -6  -4   13.32    4.46 
   7  -6  -3   15.36    5.35 
   7  -6  -2    1.92    2.31 
  -7  -6   1    7.90    5.67 
   7  -6  -1   -3.42    2.70 
   7  -6   0    2.56    2.86 
  -7  -6   0   -1.10    2.56 
  -7  -6  -1    2.40    5.40 
   7  -6   1    0.03    2.73 
   7  -6   2    7.69    2.71 
  -7  -6  -2    4.04    5.36 
   7  -6   2   -3.08    4.06 
  -7  -6  -3    9.83    7.77 
   7  -6   3   11.59    2.64 
   7  -6   3   20.96    8.51 
  -7  -6  -4   36.34    8.80 
   7  -6   4   28.31    6.27 
   7  -6   4   15.95    7.00 
  -7  -6  -5    9.75    5.89 
   7  -6   5   -0.46    3.74 
   7  -6   5    9.72    4.37 
   7  -6   6   12.35    4.72 
   7  -6   6   12.15    7.23 
  -7  -6  -6    6.93    5.81 
   7  -6   7   30.09   10.81 
   7  -6   7   13.22    4.99 
  -7  -6  -7   38.66    9.89 
   7  -6   8   43.76   11.85 
   7  -6   9   -1.57    5.43 
   7  -6  10   -1.29    3.11 
   7  -6  11   -7.24    7.67 
   7  -6  12  -11.68    4.61 
   7  -6  13   -1.72    5.46 
   7  -6  14   -5.51    6.93 
   7  -6  15   -5.61    8.95 
   7   7 -19    3.99    9.37 
   7   7 -18   15.13   10.93 
   7   7 -17   -3.20    8.93 
   7   7 -16    2.46    7.11 
   7   7 -15   -9.62    8.13 
   7   7 -14    6.12   10.59 
   7   7 -13    6.76    7.44 
   7   7 -12   -4.64    6.77 
  -7   7  11   -2.00    3.49 
   7   7 -11    1.87    2.93 
  -7   7  10    6.30    3.10 
   7   7 -10   -1.04    2.62 
   7   7  -9   49.11   12.15 
  -7   7   9   57.27    7.65 
   7   7  -8    7.79    6.84 
   7  -7  -7    7.79    2.23 
   7   7  -7    9.07    5.92 
   7   7  -6    2.43    2.64 
   7  -7  -6    0.72    1.88 
   7  -7  -5    2.35    3.65 
   7   7  -5    1.80    3.84 
   7   7  -4   17.33    7.23 
   7  -7  -4   22.76    5.56 
   7  -7  -3   -2.57    2.21 
   7  -7  -2    6.07    4.79 
   7  -7  -1   17.63    7.00 
   7  -7   0    5.46    4.66 
   7  -7   1   11.61    4.32 
   7  -7   2    3.73    3.98 
   7  -7   3   -9.17    6.07 
   7  -7   4    0.25    4.24 
   7  -7   4    2.57    2.62 
   7  -7   5   26.14    9.32 
   7  -7   6   16.06    7.67 
   7  -7   7    3.77    4.13 
   7  -7   8   -1.71    6.21 
   7  -7   9    6.50    8.70 
   7  -7  10   17.63    9.74 
   7  -7  11   10.31    8.39 
   7  -7  12   -1.86    3.58 
   7  -7  13   14.66   11.44 
   7  -7  14   -9.04   11.94 
   7   8 -18  -14.21    9.35 
   7   8 -17    3.73    4.29 
   7   8 -16   20.18   12.84 
   7   8 -15   -2.16    6.37 
   7   8 -14    8.20    5.59 
   7   8 -13   -3.94    7.38 
   7   8 -12   -3.56    3.87 
   7   8 -11    0.19    6.85 
   7   8 -10    1.87    2.92 
   7   8  -9    1.35    3.54 
   7   8  -8    7.49    7.45 
   7  -8  -7    2.46    1.28 
   7   8  -7   -1.36    2.71 
   7   8  -6    0.48    3.54 
   7  -8  -6    1.00    1.80 
   7   8  -5    7.33    3.78 
   7  -8  -5   11.38    4.51 
   7   8  -4    7.55    6.06 
   7  -8  -4    1.27    2.95 
   7   8  -3   15.70    8.69 
   7  -8  -3    5.06    3.29 
   7  -8  -2    4.67    3.89 
   7  -8  -1    4.36    3.03 
   7  -8   0    5.29    4.56 
   7  -8   1   18.88    7.39 
   7  -8   2   36.34   10.61 
   7  -8   3    7.93    5.77 
   7  -8   4   -4.92    4.82 
   7  -8   5    1.42    3.02 
   7  -8   6   43.56   13.81 
   7  -8   7   -2.93    4.99 
   7  -8   8    5.98    7.82 
   7  -8   9   -2.84    7.24 
   7  -8  10    0.42    3.87 
   7  -8  11   12.71    9.99 
   7  -8  12   24.19   12.89 
   7   9 -17   21.04    8.46 
   7   9 -16   -2.67    9.76 
   7   9 -15   -0.63    7.50 
   7   9 -14    9.36   10.10 
   7   9 -13    5.71    3.82 
   7   9 -12    6.29    7.11 
   7   9 -11    9.47    8.61 
   7   9 -10    0.11    4.06 
   7   9  -9    7.42    6.97 
   7   9  -8   11.32    7.97 
   7   9  -7    3.12    4.37 
   7   9  -6   -4.96    3.96 
   7   9  -5   -0.07    5.10 
   7  -9  -5   -0.55    2.94 
   7   9  -4   -1.00    4.17 
   7  -9  -4    3.42    3.53 
   7   9  -3    3.55    3.64 
   7  -9  -3    8.87    5.08 
   7   9  -2    6.60    5.42 
   7  -9  -2    5.53    4.66 
   7  -9  -1   -0.94    2.38 
   7  -9   0    4.02    3.71 
   7  -9   1   -3.25    6.29 
   7  -9   2    0.13    3.57 
   7  -9   3   -7.64    7.51 
   7  -9   4    0.24    4.20 
   7  -9   5    9.45    8.21 
   7  -9   6  -16.02   11.00 
   7  -9   7    2.56    4.36 
   7  -9   8   18.37   11.49 
   7  -9   9  -12.99    7.55 
   7  -9  10    4.87    4.44 
   7  10 -16  -23.08   12.65 
   7  10 -15   12.80    7.43 
   7  10 -14   10.41    7.68 
   7  10 -13    0.35    6.15 
   7  10 -12   -4.96    9.09 
   7  10 -11   12.73    6.43 
   7  10 -10   -2.26    4.82 
   7  10  -9    1.22    3.11 
   7  10  -8   -1.18    7.10 
   7  10  -7   -4.74    5.47 
   7  10  -6   -9.31    6.05 
   7  10  -5    3.82    7.81 
   7  10  -4    6.55    6.86 
   7  10  -3   -5.80    4.98 
   7 -10  -3   -1.87    3.17 
   7  10  -2    8.60    6.89 
   7 -10  -2    2.90    5.10 
   7  10  -1   -6.18    6.29 
   7 -10  -1   -6.76    5.88 
   7 -10   0    2.97    4.30 
   7 -10   1    0.68    4.95 
   7 -10   2    0.21    5.88 
   7 -10   3    0.61    3.19 
   7 -10   4    2.89    6.84 
   7 -10   5   -1.69    6.72 
   7 -10   6    8.80   11.25 
   7 -10   7   17.39   10.83 
   7 -10   8    4.38    7.37 
   7 -10   9   12.32   10.04 
   7  11 -11   13.41    4.33 
   7  11 -10  -17.03   11.12 
   7  11  -9   -4.74    6.56 
   7  11  -8    0.22    7.78 
   7  11  -7   10.73    7.03 
   7  11  -6    1.73    7.33 
   7  11  -5    5.03    4.85 
   7  11  -4    4.05    5.55 
   7  11  -3   -5.15    6.19 
   7  11  -2   -7.86    7.26 
   7  11  -1   -6.93    6.63 
   7  11   0  -11.98   10.78 
   7 -11   0    0.76    3.98 
   7 -11   1   -7.31    6.12 
   7 -11   2   27.04   11.35 
   7 -11   3   -9.51    6.65 
   7 -11   4   -2.62    4.98 
   7 -11   5   -5.09    4.97 
   7 -11   6   17.43   10.43 
   7 -11   7  -17.01   10.08 
  -8   0  21    4.57    3.61 
  -8   0  20   -3.47    3.80 
  -8   0  19    0.90    1.40 
   8   0 -19    2.69    5.55 
   8   0 -18   14.76    8.05 
   8   0 -17    2.47    3.70 
   8   0 -16    2.37    4.52 
   8   0 -15   -4.92    3.99 
   8   0 -14   -4.01    4.01 
   8   0 -13   -5.47    5.59 
  -8   0  12   54.94   11.94 
   8   0 -12   62.16   12.60 
  -8   0  11    5.28    2.37 
   8   0 -11   -3.58    3.59 
   8   0 -10  136.93   16.84 
  -8   0  10  148.69   17.47 
  -8   0   9    4.75    4.50 
   8   0  -9   -3.88    3.58 
   8   0  -8    1.89    2.36 
  -8   0   8   -8.08    3.79 
   8   0  -7    3.00    3.69 
  -8   0   7    5.97    4.09 
   8   0  -6    0.70    1.53 
  -8   0   6    0.71    1.81 
   8   0  -5   -0.64    2.23 
  -8   0   5   -1.62    2.09 
  -8   0   4   18.09    5.65 
  -8   0   3    2.73    2.72 
  -8   0   2  136.27   14.37 
  -8   0   1   -0.72    2.73 
  -8   0   0   65.18   10.99 
  -8   0  -1    1.06    2.59 
  -8   0  -2   38.04    9.67 
  -8   0  -3   -1.64    3.27 
  -8   0  -4   -4.39    4.34 
  -8   0  -5   -0.33    3.91 
   8   0   5   -0.60    1.76 
  -8   0  -6   24.70    9.95 
   8   0   6   22.03    7.80 
   8   0   7   -5.42    5.36 
   8   0   8   10.81    6.29 
   8   0   9    0.84    3.06 
   8   0  10    1.62    2.81 
   8   0  11   -5.36    5.43 
   8   0  12   11.86    8.38 
   8   0  13   -0.16    6.21 
   8   0  14    7.78    7.16 
   8   0  15   -0.91    4.18 
   8   0  16   -8.62    6.16 
   8   0  17  -16.74    8.80 
   8   0  18    0.72    5.50 
   8   0  19   -7.14    5.83 
  -8  -1  23    8.09    3.63 
  -8  -1  22    7.06    7.07 
  -8  -1  20   -3.55    5.19 
   8   1 -20   -7.11    6.61 
  -8   1  20    3.43    6.18 
  -8   1  19    0.38    4.25 
   8   1 -19   -1.20    3.65 
  -8   1  18    1.12    3.21 
   8  -1 -18    3.30    5.45 
   8   1 -18  -11.26    8.35 
   8  -1 -17    9.03    5.49 
   8   1 -17    8.17    8.35 
   8   1 -16    7.24    6.28 
   8  -1 -16   -1.60    3.71 
   8   1 -15    9.43    5.70 
   8  -1 -15    4.62    3.86 
   8   1 -14   10.04    6.28 
   8  -1 -14   10.47    5.80 
   8  -1 -13    7.33    4.26 
   8   1 -13    6.26    3.50 
   8  -1 -12   13.92    6.40 
   8   1 -12    3.81    3.84 
  -8   1  12   12.16    5.03 
  -8   1  11    4.49    3.85 
   8  -1 -11    8.82    3.54 
   8   1 -11    1.91    3.17 
  -8  -1  11    5.06    4.47 
   8  -1 -10   11.32    4.46 
  -8   1  10    8.44    3.68 
  -8   1  10    9.61    3.64 
   8   1 -10    4.46    3.15 
  -8   1   9    0.14    2.12 
   8   1  -9    4.59    3.92 
  -8   1   9   -2.90    2.51 
   8  -1  -9   -0.07    2.44 
  -8   1   8    2.85    1.97 
   8   1  -8    3.09    2.90 
  -8   1   8    6.07    3.39 
   8  -1  -8    3.35    2.49 
   8  -1  -7   31.44    6.88 
  -8   1   7   27.34    6.14 
   8   1  -7   20.48    6.74 
  -8   1   6    5.96    3.30 
  -8  -1   6    8.40    2.81 
   8  -1  -6    6.40    2.55 
   8   1  -6    6.93    3.45 
  -8   1   5    7.55    3.91 
   8   1  -5    2.01    2.00 
  -8  -1   5    8.29    4.02 
   8  -1  -5    9.03    3.65 
   8  -1  -5   10.58    3.91 
  -8   1   4   16.40    4.73 
  -8  -1   4   21.26    6.12 
   8  -1  -4   13.78    4.80 
  -8   1   3  148.19   14.58 
   8  -1  -3  147.46   14.34 
  -8  -1   3  168.55   16.45 
  -8  -1   2   30.01    7.39 
  -8   1   2   33.33    7.10 
  -8   1   1  112.78   13.78 
  -8  -1   1  109.00   13.95 
  -8   1   0   69.39   11.55 
  -8  -1   0   62.30   11.10 
  -8  -1  -1   95.70   13.35 
  -8   1  -1   99.32   13.60 
  -8   1  -2    2.48    2.39 
  -8  -1  -2    4.27    4.67 
   8   1   3    0.83    2.43 
  -8   1  -3    0.76    4.87 
  -8  -1  -3    1.46    3.69 
   8   1   4    2.72    2.66 
  -8   1  -4   -1.56    4.39 
  -8  -1  -4    4.30    3.30 
   8   1   5   18.03    7.00 
  -8  -1  -5   12.72    6.69 
  -8   1  -5   20.88    7.72 
   8   1   6   17.48    7.09 
  -8  -1  -6    4.79    3.38 
   8  -1   6   15.54    7.22 
   8   1   7    3.34    3.40 
   8  -1   7    3.82    3.49 
   8   1   8    0.39    3.00 
   8  -1   8    2.16    3.08 
   8   1   9   11.45    6.29 
   8  -1   9    2.73    2.97 
   8   1  10   -0.57    4.34 
   8  -1  10   -0.10    2.45 
   8   1  11   -1.13    4.04 
   8  -1  11   -9.54    8.27 
   8   1  12    4.16    4.25 
   8  -1  12   13.04    7.89 
   8   1  13   -3.49    4.41 
   8  -1  13   -1.25    3.08 
   8   1  14    4.96    5.70 
   8  -1  14   -1.58    3.09 
   8   1  15   -4.36    7.33 
   8  -1  15   -3.07    8.44 
   8   1  16  -13.58    8.65 
   8  -1  16   -3.18    6.52 
   8   1  17    4.88    6.46 
   8  -1  17    7.59   10.77 
   8   1  18    1.45    6.42 
   8  -1  18   -6.99    8.40 
   8   1  19  -21.51   14.66 
   8  -1  19    2.75    6.21 
  -8  -2  24   -2.42    6.08 
  -8  -2  23    2.47    3.42 
  -8  -2  22   -1.11    2.72 
   8   2 -21   -1.18    5.41 
  -8  -2  21   -3.89    3.72 
  -8  -2  20    3.52    3.06 
   8   2 -20   -6.76    7.00 
   8   2 -19   -3.20    4.07 
  -8   2  18    0.33    1.61 
   8   2 -18    8.10    8.37 
   8   2 -17   10.10    6.20 
  -8   2  17   11.81    4.88 
   8   2 -16    1.87    5.86 
  -8   2  16   -0.80    2.43 
   8   2 -15    0.61    4.21 
   8  -2 -15   -0.81    4.06 
   8   2 -14    0.26    3.23 
   8  -2 -14    3.02    3.18 
   8   2 -13    0.68    5.36 
  -8   2  13   -2.10    3.32 
  -8   2  13   -0.03    1.51 
   8  -2 -13    1.36    4.06 
   8  -2 -12    5.59    3.45 
  -8   2  12    7.55    3.45 
   8   2 -12    0.75    2.05 
  -8   2  12   -0.97    2.82 
   8  -2 -11   40.96    9.10 
   8   2 -11   50.47   11.53 
  -8   2  11   41.13    9.38 
  -8   2  11   29.87    6.55 
  -8   2  10    8.80    3.68 
   8  -2 -10    7.97    3.62 
  -8   2  10   11.91    3.47 
   8   2 -10    6.72    3.80 
  -8   2   9   27.49    5.52 
   8   2  -9   32.89    8.62 
   8  -2  -9   40.50    8.14 
  -8   2   9   37.11    7.62 
  -8   2   8    3.40    1.66 
   8  -2  -8    4.99    1.89 
   8   2  -8    4.96    3.94 
  -8   2   8   -0.22    2.53 
  -8   2   7    8.58    2.81 
   8   2  -7    7.31    4.11 
   8  -2  -7    2.13    2.33 
   8  -2  -6   10.87    3.74 
   8   2  -6    7.55    3.47 
   8  -2  -6   12.52    4.07 
  -8   2   6    7.86    3.49 
   8  -2  -5    1.90    1.34 
  -8  -2   5   -1.27    2.88 
   8  -2  -5   -1.65    1.05 
  -8   2   5   -3.95    2.52 
   8  -2  -4    2.92    2.13 
   8  -2  -4    1.20    1.84 
  -8  -2   4    1.46    2.38 
  -8   2   4    0.97    1.94 
   8  -2  -3    8.94    3.75 
  -8  -2   3   21.47    6.06 
  -8   2   3   19.94    6.47 
  -8   2   2   59.49    9.90 
   8  -2  -2   55.07    9.53 
  -8  -2   2   62.81   10.96 
   8  -2  -1    0.77    2.44 
  -8  -2   1    7.11    4.89 
  -8   2   1    1.49    2.56 
  -8  -2   0   14.19    6.33 
  -8   2   0   23.30    6.73 
  -8  -2  -1   18.58    5.31 
   8   2   1   24.97    7.51 
  -8   2  -1   22.69    7.11 
   8   2   2   15.01    6.17 
  -8   2  -2   25.14    8.37 
  -8  -2  -2   17.66    6.93 
   8   2   3   -2.78    3.56 
  -8   2  -3    3.29    4.33 
  -8  -2  -3    7.01    5.15 
  -8   2  -4   53.27   11.56 
   8   2   4   32.22    8.78 
  -8  -2  -4   57.01   11.67 
   8   2   5    8.77    4.43 
  -8   2  -5   10.77    7.82 
  -8  -2  -5    7.72    5.80 
   8   2   6    8.04    5.19 
  -8  -2  -6    9.55    3.78 
   8  -2   6   13.45    6.29 
   8   2   7    5.36    3.93 
   8  -2   7    1.09    3.96 
  -8  -2  -7   -1.53    2.13 
   8   2   8    1.49    3.71 
   8  -2   8   -5.99    5.24 
   8   2   9    7.54    5.59 
   8  -2   9    9.61    6.16 
   8   2  10   -1.28    2.93 
   8  -2  10   -6.25    8.58 
   8   2  11    0.40    2.80 
   8  -2  11    2.86    4.35 
   8   2  12    7.62    6.21 
   8  -2  12   -4.37    4.50 
   8   2  13   -3.75    6.27 
   8  -2  13    0.25    4.54 
   8   2  14   -4.77    7.09 
   8  -2  14    3.00    5.50 
   8   2  15    1.10    3.33 
   8  -2  15    1.32    7.03 
   8   2  16    3.55    4.28 
   8  -2  16    8.76    7.99 
   8   2  17    4.48    8.45 
   8  -2  17  -13.23   11.10 
   8   2  18   -8.06    4.34 
   8  -2  18   -8.14   10.99 
  -8  -3  24    6.14    8.42 
  -8  -3  23   13.45    7.66 
  -8  -3  22  -22.16   10.29 
   8   3 -22   11.40    9.72 
  -8  -3  21    7.70    6.00 
   8   3 -21   -8.14    7.08 
   8   3 -20    4.22   11.73 
   8   3 -19    0.40    4.15 
   8   3 -18    1.42    5.97 
   8   3 -17    7.77    6.25 
  -8   3  17   21.16    4.66 
   8   3 -16    1.06    2.92 
  -8   3  16   -0.39    1.50 
   8   3 -15    3.57    5.34 
  -8   3  15    0.41    2.53 
  -8   3  15   -2.52    2.15 
  -8   3  14   -0.63    1.48 
   8   3 -14    1.13    2.90 
  -8   3  13    2.07    1.85 
  -8   3  13   -0.81    4.54 
   8  -3 -13   -4.04    3.25 
   8   3 -13   -2.26    4.22 
  -8   3  12    2.08    0.88 
  -8   3  12    0.35    3.21 
   8   3 -12   -0.45    2.33 
   8  -3 -12    4.26    3.44 
  -8   3  11    8.25    2.51 
  -8   3  11   16.23    6.06 
   8  -3 -11   16.86    5.68 
   8   3 -11   12.46    7.47 
   8   3 -10    1.68    2.89 
   8  -3 -10    0.42    2.55 
  -8   3  10    0.60    2.25 
  -8   3  10    0.93    1.66 
  -8   3   9   13.38    4.62 
   8   3  -9   16.81    7.00 
  -8   3   9    9.66    3.00 
   8  -3  -9   13.41    4.79 
   8  -3  -8    4.96    2.71 
  -8   3   8    1.38    2.29 
  -8   3   8    1.38    1.04 
   8   3  -8    3.92    2.19 
   8  -3  -7    5.66    2.82 
   8   3  -7    2.66    3.22 
  -8   3   7    7.41    2.69 
   8  -3  -6    6.09    2.59 
   8  -3  -6    2.10    1.38 
  -8   3   6    5.07    2.16 
   8   3  -6   10.70    5.25 
   8  -3  -5    4.09    2.99 
   8  -3  -5    2.41    1.71 
  -8   3   5    2.99    2.17 
   8  -3  -4   40.90    7.17 
  -8   3   4   50.54    8.41 
  -8  -3   4   51.87   10.91 
   8  -3  -4   40.72    5.39 
   8  -3  -3   22.14    5.76 
   8  -3  -3   21.83    4.11 
  -8  -3   3   16.09    6.29 
  -8   3   3   23.88    6.06 
  -8  -3   2    5.76    4.61 
  -8   3   2    0.98    2.06 
   8  -3  -2    1.09    1.93 
  -8  -3   1    5.67    4.32 
  -8   3   1    8.43    4.07 
   8  -3  -1    8.72    4.72 
  -8  -3   0    6.87    4.88 
  -8   3   0    5.04    3.11 
   8  -3   0   10.54    4.65 
  -8  -3  -1   37.87    8.94 
  -8   3  -1   32.70    8.56 
   8   3   1   26.48    7.01 
   8  -3   1   23.82    6.67 
  -8   3  -2    2.48    3.59 
  -8  -3  -2    2.34    3.22 
   8   3   2    6.64    3.74 
   8  -3   2    3.82    4.03 
   8   3   3    1.11    2.63 
  -8   3  -3   -2.20    3.18 
  -8  -3  -3    0.01    2.85 
   8   3   4   18.05    6.68 
  -8   3  -4   11.87    6.78 
   8  -3   4   16.84    7.35 
  -8  -3  -4   18.13    6.75 
   8   3   5    3.78    3.12 
   8  -3   5    4.41    3.93 
  -8  -3  -5   10.92    5.93 
   8   3   6    0.42    2.78 
   8  -3   6   -2.16    4.51 
   8  -3   6   -0.05    2.84 
  -8  -3  -6    0.32    1.95 
   8  -3   7   20.77    7.25 
   8   3   7   17.35    7.74 
  -8  -3  -7   17.15    7.98 
   8  -3   7   27.37   10.37 
   8   3   8    7.31    4.13 
   8  -3   8    5.83    6.42 
   8   3   9   -0.18    4.40 
   8  -3   9   -5.44    3.84 
   8   3  10    3.71    5.41 
   8  -3  10    3.89    5.97 
   8   3  11    7.60    4.61 
   8  -3  11    9.50    6.57 
   8   3  12   -2.76    5.19 
   8  -3  12   -0.06    4.72 
   8   3  13   -2.73    4.41 
   8  -3  13   -1.48    4.54 
   8   3  14    9.07    4.50 
   8  -3  14    1.89    5.51 
   8   3  15   -4.33    5.31 
   8  -3  15    5.10    4.21 
   8   3  16    2.81    5.09 
   8  -3  16    4.16    5.54 
   8   3  17    5.03    8.73 
   8  -3  17   -1.08   10.20 
  -8  -4  23   13.69    7.30 
  -8  -4  22    1.52    3.46 
  -8  -4  21  -10.50    8.49 
   8   4 -21   -0.90    3.16 
   8   4 -20   -3.41   10.06 
   8   4 -19   -5.01    8.76 
   8   4 -18    0.58    5.44 
   8   4 -17    2.37    4.64 
   8   4 -16   -3.45    5.12 
   8   4 -15    5.88    4.88 
   8   4 -14    0.96    5.71 
  -8   4  13   18.97    6.74 
   8   4 -13   23.06    9.40 
  -8   4  12    1.93    3.42 
   8   4 -12    3.01    3.05 
  -8   4  11   13.52    4.89 
   8   4 -11    7.02    4.51 
   8   4 -10    5.95    3.29 
  -8   4  10   17.43    5.48 
  -8   4   9   33.95    6.41 
   8   4  -9   36.68    9.87 
  -8   4   9   26.36    3.36 
  -8   4   8    1.37    1.51 
  -8   4   8    3.45    2.05 
   8   4  -8    4.94    5.50 
  -8   4   7    7.70    2.56 
   8   4  -7    5.70    2.93 
   8  -4  -7    6.08    2.01 
   8  -4  -7    9.43    2.90 
   8  -4  -6    4.13    2.07 
   8   4  -6    1.12    2.94 
  -8   4   6    3.24    2.42 
   8  -4  -6   -1.07    1.84 
   8  -4  -5    2.79    2.46 
  -8   4   5    0.34    1.84 
   8  -4  -5   -0.28    0.74 
   8  -4  -4   44.03    7.39 
  -8   4   4   50.45    8.38 
  -8  -4   4   36.63   12.15 
   8  -4  -4   50.00    4.19 
   8  -4  -3    9.62    1.73 
  -8   4   3   12.09    4.41 
  -8  -4   3   13.65    6.65 
   8  -4  -3    7.86    3.71 
  -8  -4   2   22.88    7.97 
  -8   4   2   19.33    5.33 
   8  -4  -2   22.87    2.78 
   8  -4  -2   28.00    6.81 
  -8   4   1    5.65    3.42 
  -8  -4   1    7.64    3.96 
   8  -4  -1    2.53    2.58 
  -8  -4   0   20.07    6.42 
  -8   4   0   18.37    5.52 
   8  -4   0   17.57    6.28 
  -8  -4  -1   -1.54    3.65 
  -8   4  -1    0.71    2.57 
   8  -4   1   -0.89    1.72 
   8  -4   1    0.46    2.35 
  -8  -4  -2    5.23    2.31 
   8  -4   2   10.80    5.70 
   8  -4   2    8.94    3.24 
  -8   4  -2    6.81    4.02 
  -8  -4  -3    6.29    5.36 
   8  -4   3    6.16    4.06 
  -8   4  -3    3.28    4.42 
   8   4   3    4.28    3.73 
   8  -4   3    6.17    2.21 
   8   4   4   20.40    6.50 
   8  -4   4   18.44    7.40 
   8  -4   4   20.82    6.13 
  -8  -4  -4   21.40    7.19 
   8   4   5    2.65    2.66 
   8  -4   5    8.57    6.16 
   8  -4   5    6.59    3.88 
  -8  -4  -5    9.65    3.05 
   8   4   6   -1.66    2.86 
   8  -4   6    6.82    5.28 
  -8  -4  -6    1.92    2.40 
   8  -4   6    2.83    3.01 
   8   4   7    4.98    4.88 
   8  -4   7   -2.37    5.86 
   8  -4   7    1.44    2.65 
   8  -4   8   12.34    6.21 
   8   4   8    8.94    4.49 
   8  -4   8   12.41    7.45 
   8  -4   9    3.90    8.00 
   8   4   9    4.12    5.58 
   8   4  10    8.32    7.55 
   8  -4  10   19.13    9.15 
   8  -4  11    3.16    4.51 
   8   4  11    1.24    4.10 
   8   4  12   -1.79    2.48 
   8  -4  12   -7.26    6.99 
   8   4  13    1.21    3.75 
   8  -4  13   -9.39    9.20 
   8  -4  14    0.16    6.00 
   8   4  14   -1.01    3.44 
   8   4  15   -4.62    5.69 
   8  -4  15   -2.38    5.89 
   8  -4  16   -7.21   10.17 
  -8  -5  22   -7.93    9.54 
  -8  -5  21   -5.91    6.07 
   8   5 -21   -3.81    5.11 
   8   5 -20   -0.68    4.05 
   8   5 -19   -9.07    9.27 
   8   5 -18   -7.10    6.51 
   8   5 -17   -3.43    4.22 
   8   5 -16    2.20    4.76 
   8   5 -15   -6.46    7.31 
   8   5 -14    1.15    3.30 
  -8   5  13   30.29    8.81 
   8   5 -13   21.91    9.65 
  -8   5  12   54.14    9.72 
   8   5 -12   39.97   12.30 
  -8   5  11   48.02    8.65 
   8   5 -11   31.14   10.32 
   8   5 -10    3.78    3.49 
  -8   5  10    5.16    3.23 
  -8   5   9   25.15    5.63 
   8   5  -9   22.32    8.49 
  -8   5   8    4.63    2.85 
   8   5  -8    1.83    2.31 
   8  -5  -7    0.59    1.42 
   8   5  -7    0.52    2.20 
   8  -5  -6   -1.45    1.22 
   8   5  -6   -2.92    2.79 
   8  -5  -5    6.58    2.68 
   8   5  -5    7.30    4.40 
  -8   5   4    5.99    3.03 
   8  -5  -4    3.91    2.58 
  -8   5   3    2.39    2.62 
  -8  -5   3    1.13    3.89 
   8  -5  -3    0.49    2.01 
  -8   5   2    9.50    4.13 
  -8  -5   2    3.62    4.17 
   8  -5  -2    6.77    2.76 
  -8   5   1   -2.49    2.64 
  -8  -5   1   -2.17    5.40 
   8  -5  -1   -3.80    4.59 
  -8   5   0    2.03    2.78 
  -8  -5   0    4.36    3.89 
   8  -5   0    3.46    1.18 
   8  -5   0   -1.42    3.57 
  -8   5  -1   11.23    3.84 
  -8  -5  -1   15.04    6.96 
   8  -5   1   15.08    3.13 
   8  -5   1    5.79    4.18 
  -8  -5  -2    7.03    4.27 
   8  -5   2    3.68    2.58 
   8  -5   2   -2.16    4.84 
  -8  -5  -3    1.86    3.75 
   8  -5   3    5.16    2.82 
   8  -5   3    2.11    2.64 
  -8  -5  -4   -0.92    4.61 
   8  -5   4    3.12    1.66 
   8  -5   4   -4.39    3.96 
   8  -5   5    3.46    3.50 
   8  -5   5    1.99    4.49 
  -8  -5  -5    2.50    2.69 
   8  -5   6   11.12    4.05 
   8  -5   6   20.18    9.31 
   8  -5   7   11.08    4.85 
   8   5   7   11.15    5.16 
   8  -5   7   11.43    7.68 
   8  -5   8   -7.37    5.16 
   8   5   8    4.95    4.96 
   8  -5   8  -10.09    6.67 
   8   5   9   -3.43    5.51 
   8  -5   9   -5.73    5.41 
   8   5  10    8.01    7.03 
   8  -5  10   24.03   10.57 
   8   5  11    4.20    4.47 
   8  -5  11    4.15    7.46 
   8   5  12    2.86    5.29 
   8  -5  12    1.18    3.14 
   8   5  13   -3.72    4.49 
   8  -5  13   -2.32    4.85 
   8   5  14   -3.06    8.42 
   8  -5  14   -2.80    5.49 
   8  -5  15   -1.06    6.77 
   8   6 -20   -4.31    8.34 
   8   6 -19    2.30    6.35 
   8   6 -18   -0.86    6.73 
   8   6 -17   -0.82    5.14 
   8   6 -16   -7.21    7.10 
   8   6 -15    3.62    3.47 
   8   6 -14    1.39    7.21 
  -8   6  13   10.64    4.51 
   8   6 -13   15.07    9.07 
  -8   6  12   -0.66    1.97 
   8   6 -12    1.64    5.36 
  -8   6  11   -1.74    2.96 
   8   6 -11    5.47    5.02 
   8   6 -10   17.59    7.35 
  -8   6  10   25.10    6.01 
   8   6  -9   -1.14    4.30 
  -8   6   9   -0.77    1.84 
   8   6  -8    7.86    4.74 
   8   6  -7   -7.41    5.15 
   8  -6  -7   -1.43    2.03 
   8  -6  -6    6.93    2.24 
   8   6  -6   13.80    7.59 
   8   6  -5    3.50    3.35 
   8  -6  -5    6.91    3.01 
   8  -6  -4    6.27    3.90 
   8  -6  -3    6.01    2.90 
   8  -6  -2   -1.38    2.16 
   8  -6  -1   19.82    6.76 
   8  -6   0   -2.02    4.03 
   8  -6   1    0.72    3.13 
   8  -6   2   26.21    4.06 
   8  -6   2   18.31    7.45 
   8  -6   3   17.27    3.57 
   8  -6   3   20.57    7.37 
   8  -6   4   72.34    9.53 
   8  -6   4   73.43   14.92 
   8  -6   5   26.23   10.29 
   8  -6   5   17.06    4.29 
   8  -6   6    4.98    4.85 
   8  -6   6    5.74    2.20 
   8  -6   7    6.75    4.64 
   8  -6   7    9.84    7.50 
   8  -6   8   21.54    9.08 
   8  -6   9    8.07    7.38 
   8  -6  10    1.78    5.16 
   8  -6  11    9.30    7.77 
   8  -6  12   15.86   10.76 
   8  -6  13   -1.05    4.96 
   8  -6  14  -14.50    7.21 
   8   7 -19  -15.26    7.26 
   8   7 -18    3.56    8.01 
   8   7 -17    1.77    7.19 
   8   7 -16   -0.33    5.92 
   8   7 -15    1.00    4.03 
   8   7 -14   -0.64    4.73 
   8   7 -13    1.24    3.74 
   8   7 -12    5.44    6.41 
   8   7 -11   13.32    8.34 
   8   7 -10   22.69   10.08 
  -8   7  10   17.69    4.09 
   8   7  -9   -7.71    5.47 
   8   7  -8    4.49    3.05 
   8  -7  -7   13.54    3.93 
   8   7  -7   18.97    8.27 
   8   7  -6    4.23    2.73 
   8  -7  -6    7.48    3.11 
   8   7  -5   -1.92    3.96 
   8  -7  -5   -0.99    2.36 
   8   7  -4   -2.71    2.77 
   8  -7  -4    2.06    1.57 
   8  -7  -3    2.17    2.19 
   8  -7  -2    0.39    1.73 
   8  -7  -1   17.94    5.73 
   8  -7   0    0.64    2.76 
   8  -7   1    5.53    4.87 
   8  -7   2    2.21    3.10 
   8  -7   3   28.59   10.17 
   8  -7   4    2.23    3.25 
   8  -7   5   -3.65    6.30 
   8  -7   6    1.78    5.25 
   8  -7   7   -1.98    5.85 
   8  -7   8    6.52    5.30 
   8  -7   9   -3.79   11.38 
   8  -7  10  -15.49    4.99 
   8  -7  11    3.36   10.27 
   8  -7  12   -0.82    5.13 
   8  -7  13    8.43    8.74 
   8   8 -18   11.43   11.22 
   8   8 -17    5.48   10.26 
   8   8 -16    2.22    7.22 
   8   8 -15   10.39    8.00 
   8   8 -14    0.89    4.66 
   8   8 -13  -10.66   10.32 
   8   8 -12  -12.02    8.76 
   8   8 -11   -1.87    4.64 
   8   8 -10    5.06    3.12 
   8   8  -9   11.33    7.71 
   8   8  -8    8.23    7.44 
   8  -8  -7   -1.69    2.71 
   8   8  -7    2.60    2.57 
   8   8  -6    0.95    3.77 
   8  -8  -6    4.36    2.53 
   8   8  -5   33.44   10.88 
   8  -8  -5   43.63    9.14 
   8  -8  -4   17.31    5.72 
   8   8  -4   28.38   10.34 
   8  -8  -3    2.12    2.82 
   8  -8  -2   11.15    6.02 
   8  -8  -1    7.03    3.41 
   8  -8   0   -0.92    3.42 
   8  -8   1    3.63    3.47 
   8  -8   2   -1.00    5.27 
   8  -8   3   -1.58    5.23 
   8  -8   4    4.63    3.56 
   8  -8   5    2.14    3.40 
   8  -8   6    1.55    6.10 
   8  -8   7   16.46   10.24 
   8  -8   8    6.94    4.27 
   8  -8   9    3.61    4.56 
   8  -8  10    9.55    7.54 
   8  -8  11   13.15   11.13 
   8   9 -17   -1.64   10.35 
   8   9 -16   -1.25    5.83 
   8   9 -15    2.63    7.92 
   8   9 -14   16.43   10.51 
   8   9 -13    0.21    5.04 
   8   9 -12   17.05    9.20 
   8   9 -11   -3.63    7.15 
   8   9 -10  -12.05    8.51 
   8   9  -9    5.26    6.73 
   8   9  -8    5.19    5.79 
   8   9  -7   14.45   10.09 
   8   9  -6    6.29    5.44 
   8   9  -5    4.28    5.32 
   8  -9  -5   13.28    5.54 
   8  -9  -4    5.80    3.73 
   8   9  -4    0.67    3.17 
   8   9  -3   -0.04    3.32 
   8  -9  -3   -0.15    4.98 
   8  -9  -2    1.33    2.05 
   8  -9  -1    9.34    5.23 
   8  -9   0   -4.46    2.93 
   8  -9   1    6.56    6.44 
   8  -9   2   -0.17    3.21 
   8  -9   3    2.47    6.04 
   8  -9   4   15.85    9.09 
   8  -9   5   -6.13    5.65 
   8  -9   6   -4.18    7.71 
   8  -9   7   -4.65    5.31 
   8  -9   8    5.52    4.01 
   8  -9   9    1.93    8.48 
   8  -9  10  -15.40   15.50 
   8  10 -15   13.39   11.76 
   8  10 -14    6.46    7.61 
   8  10 -13   -4.10    9.62 
   8  10 -12    6.37   10.25 
   8  10 -11    4.22    5.34 
   8  10 -10   -8.76    6.59 
   8  10  -9    6.38    5.21 
   8  10  -8    5.89    9.01 
   8  10  -7   -9.04    7.32 
   8  10  -6   -6.44    4.37 
   8  10  -5   -0.19    4.09 
   8  10  -4    4.44    4.64 
   8 -10  -3    3.82    4.17 
   8  10  -3   -4.90    2.82 
   8 -10  -2    3.80    6.30 
   8  10  -2    5.74    6.47 
   8 -10  -1    6.81    6.47 
   8 -10   0   -1.96    4.32 
   8 -10   1   10.43    3.96 
   8 -10   2    6.45    6.03 
   8 -10   3    3.19    5.22 
   8 -10   4   -9.24    8.76 
   8 -10   5   -3.07    4.74 
   8 -10   6    4.69    3.60 
   8 -10   7   24.88   14.85 
   8 -10   8   -3.41    9.99 
   8  11 -12    8.12    3.93 
   8  11 -11   32.99   13.99 
   8  11 -10    3.27    8.42 
   8  11  -9   15.09    8.63 
   8  11  -8    0.61    4.84 
   8  11  -7   -8.35    8.52 
   8  11  -6   -9.19    8.99 
   8  11  -5   17.42    9.56 
   8  11  -4    7.44    7.61 
   8  11  -3    5.45    3.80 
   8  11  -2   -8.90    9.69 
   8  11  -1    3.69    5.52 
   8  11   0   11.75    7.07 
   8 -11   0    7.78    8.35 
   8 -11   1    7.03    9.40 
   8 -11   2    2.76    7.84 
   8 -11   3    9.28    9.77 
   8 -11   4   18.87   12.53 
   8 -11   5    4.81    3.88 
   8 -11   6   -2.54    5.55 
  -9   0  21   -0.31    4.15 
  -9   0  20    2.83    2.91 
   9   0 -20  -10.50    8.72 
   9   0 -19    0.68    3.12 
   9   0 -18   96.06   21.65 
   9   0 -17   -1.50    3.23 
   9   0 -16   23.70    9.86 
   9   0 -15    6.68    6.19 
   9   0 -14    4.52    5.32 
   9   0 -13    2.41    2.35 
   9   0 -12    3.76    3.70 
  -9   0  11   -0.12    4.02 
   9   0 -11    3.02    3.57 
   9   0 -10   -1.85    4.02 
  -9   0  10    7.15    4.87 
   9   0  -9   -0.85    2.85 
  -9   0   9    0.64    3.14 
   9   0  -8   12.47    4.71 
  -9   0   8   25.07    6.72 
  -9   0   7    0.40    2.24 
   9   0  -7    4.08    2.98 
  -9   0   6  170.88   16.88 
   9   0  -6  167.36   16.31 
  -9   0   5   -1.38    2.05 
  -9   0   4   18.49    5.50 
  -9   0   3   -0.96    2.96 
  -9   0   2   62.87   10.44 
  -9   0   1   -0.02    1.80 
  -9   0   0    7.57    3.66 
  -9   0  -1   -1.30    3.72 
  -9   0  -2   34.14    9.85 
  -9   0  -3    4.89    5.11 
   9   0   4    3.95    3.83 
  -9   0  -4    5.75    2.89 
   9   0   5   -1.13    2.62 
   9   0   6    5.56    5.13 
   9   0   7    2.02    5.47 
   9   0   8   46.69   11.89 
   9   0   9   -0.52    3.00 
   9   0  10   59.66   15.03 
   9   0  11   -2.23    6.27 
   9   0  12    5.00    3.93 
   9   0  13    7.79    6.62 
   9   0  14    3.19    5.20 
   9   0  15    9.74    7.52 
   9   0  16   -6.60    9.40 
   9   0  17   -3.07    6.33 
   9   0  18  -14.45   11.34 
  -9  -1  22    2.35    5.01 
  -9  -1  21   -3.38   17.84 
   9   1 -21    4.95    6.95 
  -9   1  20    3.45    4.03 
   9   1 -20    7.21    7.37 
  -9   1  19   11.02    5.99 
   9  -1 -19    1.12    3.24 
   9   1 -19    3.60    4.17 
   9  -1 -18   -1.73    4.03 
   9   1 -18  -10.80    8.51 
   9   1 -17   15.12    8.67 
   9  -1 -17   29.03    9.94 
   9   1 -16    2.50    3.95 
   9  -1 -16   15.49    7.59 
   9   1 -15    4.79    3.83 
   9  -1 -15   16.43    7.63 
   9  -1 -14    1.04    2.00 
   9   1 -14   -3.27    5.19 
   9  -1 -13    6.08    4.53 
   9   1 -13   10.88    6.38 
   9  -1 -12   -6.43    5.38 
  -9   1  12    6.71    5.25 
   9   1 -12    4.34    4.62 
  -9   1  12    2.58    3.63 
  -9   1  11    5.00    3.03 
   9  -1 -11   15.34    6.07 
  -9  -1  11    8.57    4.71 
   9   1 -11    5.72    3.40 
  -9   1  11   10.86    5.45 
  -9   1  10    1.15    3.27 
   9  -1 -10    0.42    1.77 
  -9   1  10   -2.32    3.43 
   9   1 -10    0.88    2.82 
  -9   1   9   21.24    5.94 
   9   1  -9   15.53    5.73 
  -9   1   9   17.88    5.28 
   9  -1  -9   10.71    5.01 
  -9   1   8   54.06    9.05 
  -9  -1   8   57.80   11.23 
   9  -1  -8   50.97    9.16 
   9   1  -8   48.48   10.35 
  -9   1   7    8.72    3.16 
   9   1  -7    7.14    4.14 
   9  -1  -7    4.14    2.37 
  -9  -1   7    3.05    2.39 
   9  -1  -6   21.52    5.81 
  -9   1   6   22.13    5.91 
  -9  -1   6   26.85    6.96 
   9   1  -6   16.46    5.89 
  -9   1   5   46.40    8.73 
  -9  -1   5   56.60   10.33 
   9  -1  -5   55.58    9.45 
   9  -1  -5   48.35    8.14 
  -9   1   4  283.50   20.78 
   9  -1  -4  243.43   19.82 
  -9  -1   4  280.09   22.81 
  -9   1   3  335.62   23.73 
   9  -1  -3  346.79   23.51 
  -9  -1   3  342.58   25.07 
  -9  -1   2    9.05    3.86 
  -9   1   2    2.24    2.80 
  -9  -1   1   26.38    6.74 
  -9   1   1   36.26    8.29 
  -9  -1   0   27.83    7.53 
  -9   1   0   31.54    8.45 
  -9   1  -1   -0.30    2.36 
  -9  -1  -1    0.10    1.86 
  -9   1  -2   29.48    8.11 
  -9  -1  -2   22.50    8.30 
   9   1   3    3.66    2.58 
  -9  -1  -3   -3.39    5.41 
   9   1   4   10.61    5.31 
  -9   1  -4    5.74    4.60 
  -9  -1  -4   14.69    6.83 
   9   1   5    5.49    4.44 
  -9  -1  -5   -3.45    4.38 
   9  -1   5    2.52    3.48 
   9   1   6    3.74    3.76 
   9  -1   6   10.52    6.10 
   9   1   7   -0.70    2.43 
   9  -1   7    2.71    3.47 
   9   1   8    7.86    5.97 
   9  -1   8    8.21    7.76 
   9   1   9   -4.70    7.04 
   9  -1   9   -0.87    2.86 
   9   1  10   -2.69    3.66 
   9  -1  10    3.52    4.80 
   9   1  11   13.20   10.31 
   9  -1  11   30.76   11.83 
   9   1  12   -0.71    5.24 
   9  -1  12   13.43    6.64 
   9   1  13    0.20    7.79 
   9  -1  13   -1.16    3.82 
   9   1  14   -5.38    5.19 
   9  -1  14   -1.49    7.03 
   9   1  15    4.53    3.45 
   9  -1  15   -3.84    8.78 
   9   1  16   10.63    7.55 
   9  -1  16    8.19    4.41 
   9   1  17   18.99   10.34 
   9  -1  17   -7.98    3.87 
   9   1  18  -13.82    8.33 
   9  -1  18    0.34    7.73 
  -9  -2  23    2.76    6.72 
   9   2 -22    0.49    3.05 
  -9  -2  22  -10.53    5.95 
  -9  -2  21   13.06    7.81 
   9   2 -21    2.53    8.25 
   9   2 -20   -7.49    6.40 
   9   2 -19   -1.70    4.61 
   9   2 -18   19.39   10.76 
  -9   2  18   15.15    5.92 
   9   2 -17   19.33    8.87 
  -9   2  17   26.62    6.89 
   9  -2 -17   23.81   10.69 
   9   2 -16   16.40    8.54 
   9  -2 -16   19.55    7.92 
   9   2 -15    2.33    2.43 
  -9   2  15    7.23    4.55 
   9  -2 -15   -1.17    3.61 
   9   2 -14   14.66    7.62 
  -9   2  14   11.06    4.77 
   9  -2 -14    9.08    5.73 
  -9   2  13   -3.26    2.59 
   9   2 -13    6.22    3.07 
  -9   2  13    0.71    2.61 
   9  -2 -13    0.56    3.29 
   9  -2 -12   13.79    5.51 
  -9   2  12   20.73    6.63 
   9   2 -12    9.04    5.95 
  -9   2  12    8.54    4.22 
   9  -2 -11   12.44    5.27 
  -9   2  11   11.06    3.51 
  -9   2  11   14.26    5.41 
   9   2 -11    9.58    5.55 
   9   2 -10   28.48    8.98 
  -9   2  10   28.95    6.16 
   9  -2 -10   37.50    8.36 
  -9   2  10   53.02    9.78 
  -9   2   9    8.40    3.47 
   9  -2  -9    2.43    1.97 
   9   2  -9    7.73    5.24 
  -9   2   9    7.64    4.11 
  -9   2   8   14.03    4.08 
   9  -2  -8   15.07    4.62 
   9   2  -8    7.35    3.84 
  -9   2   7   13.18    4.43 
   9   2  -7   20.96    6.89 
   9  -2  -7   23.48    6.07 
   9   2  -6    8.70    4.71 
   9  -2  -6    5.01    2.50 
   9  -2  -6   -1.29    2.55 
  -9  -2   6    1.61    2.82 
  -9   2   6    3.86    2.15 
  -9   2   5    1.77    1.48 
   9  -2  -5   -0.45    2.52 
   9  -2  -5    1.99    1.75 
  -9  -2   5    3.47    2.47 
   9  -2  -4   15.54    4.51 
   9  -2  -4   17.79    4.84 
  -9  -2   4   14.77    6.00 
  -9   2   4   13.11    5.00 
   9  -2  -3   38.10    8.01 
  -9  -2   3   34.07    8.69 
  -9   2   3   30.54    7.60 
   9  -2  -2   19.53    6.08 
  -9  -2   2   23.54    8.21 
  -9   2   2   23.91    6.32 
   9  -2  -1   13.35    5.41 
  -9  -2   1   12.27    5.22 
  -9   2   1   20.64    5.90 
  -9  -2   0   12.03    5.71 
  -9   2   0   13.13    4.92 
  -9  -2  -1    3.59    2.98 
   9   2   1    0.89    2.43 
  -9   2  -1    4.18    3.50 
   9   2   2   -2.78    3.27 
  -9   2  -2    0.47    1.80 
  -9  -2  -2    2.99    3.39 
   9   2   3   32.62    8.60 
  -9   2  -3   38.95    9.63 
  -9  -2  -3   37.28    9.07 
   9   2   4   20.57    8.23 
  -9  -2  -4   21.04    6.81 
   9   2   5   16.63    7.60 
  -9  -2  -5   26.93    8.67 
   9  -2   5    2.17    2.46 
   9   2   6    4.34    3.94 
   9  -2   6   -1.37    5.35 
   9   2   7   -3.23    3.00 
   9  -2   7   -1.37    3.62 
   9   2   8   -0.32    2.54 
   9  -2   8    1.62    3.54 
   9   2   9   11.35    5.85 
   9  -2   9   -3.94    4.75 
   9   2  10    0.28    2.30 
   9  -2  10   -0.71    6.60 
   9   2  11   10.32    6.94 
   9  -2  11    8.29    6.80 
   9   2  12    2.19    2.85 
   9  -2  12    7.95    5.44 
   9   2  13    0.44    5.32 
   9  -2  13    5.01    6.53 
   9   2  14   11.30    5.46 
   9  -2  14   -6.82    6.29 
   9   2  15   -3.53    8.56 
   9  -2  15    3.80    5.99 
   9   2  16    0.70    6.32 
   9  -2  16   25.37   17.10 
   9   2  17    4.54    9.07 
   9  -2  17    3.86    9.87 
   9   2  18  -15.39    9.86 
  -9  -3  24   -4.67   12.04 
  -9  -3  23   22.03   11.95 
  -9  -3  22   -2.51    5.27 
   9   3 -22   -7.07   12.17 
   9   3 -21    9.92    5.32 
   9   3 -20   -2.20    4.56 
   9   3 -19    7.50    8.00 
   9   3 -18   -0.98    4.54 
   9   3 -17   12.87    9.99 
   9   3 -16    1.74    4.24 
  -9   3  16    4.26    2.49 
  -9   3  15   -2.42    1.66 
  -9   3  15   -0.04    1.86 
   9   3 -15   -0.82    4.15 
  -9   3  14   -0.31    2.26 
   9   3 -14    4.06    5.53 
   9  -3 -14    1.38    3.21 
  -9   3  13    1.40    1.49 
   9   3 -13   -0.62    4.80 
   9  -3 -13   -8.29    6.00 
  -9   3  13   -0.18    2.64 
  -9   3  12    8.52    4.77 
  -9   3  12    0.16    1.36 
   9   3 -12   -2.22    5.78 
   9  -3 -12   -0.74    1.75 
  -9   3  11    0.85    1.53 
  -9   3  11    0.56    3.52 
   9  -3 -11    0.49    1.66 
   9   3 -11    4.36    6.00 
   9  -3 -10    8.45    4.95 
   9   3 -10   11.59    6.04 
  -9   3  10   12.11    4.72 
  -9   3  10    8.37    2.90 
   9  -3  -9    9.49    4.01 
  -9   3   9    7.53    3.60 
   9   3  -9    8.09    5.19 
  -9   3   9    5.74    2.65 
   9   3  -8    3.23    4.45 
   9  -3  -8    0.68    2.38 
  -9   3   8    0.10    1.77 
   9  -3  -7    1.79    2.04 
   9  -3  -7    1.82    1.86 
  -9   3   7    1.94    2.88 
   9   3  -7    1.29    3.22 
   9  -3  -6    0.21    2.07 
   9   3  -6   -3.66    2.32 
  -9  -3   6    3.36    5.45 
   9  -3  -6   -2.92    2.33 
  -9   3   6   -4.46    3.02 
   9  -3  -5    1.90    1.76 
   9  -3  -5    1.14    1.28 
  -9  -3   5    0.92    2.84 
  -9   3   5    0.65    1.43 
   9  -3  -4   10.96    3.40 
   9  -3  -4   12.64    4.14 
  -9  -3   4   14.36    6.68 
  -9   3   4   10.92    4.43 
   9  -3  -3   34.04    8.01 
  -9  -3   3   43.00   10.70 
  -9   3   3   44.12    8.56 
   9  -3  -2   10.95    4.62 
  -9  -3   2   10.12    4.84 
  -9   3   2   12.57    4.76 
  -9  -3   1    6.82    5.44 
  -9   3   1   14.35    5.88 
   9  -3  -1    8.94    3.85 
  -9  -3   0   24.22    8.16 
  -9   3   0   30.34    8.51 
   9  -3   0   24.52    7.29 
  -9  -3  -1   28.02    7.94 
  -9   3  -1   19.39    6.05 
   9   3   1   21.01    7.79 
   9  -3   1   22.26    7.64 
  -9  -3  -2    8.86    4.82 
   9   3   2   13.16    6.03 
  -9   3  -2   11.02    2.83 
   9  -3   2    9.94    3.28 
   9  -3   3  100.91   16.72 
  -9  -3  -3  107.87   17.40 
  -9   3  -3  120.37   18.15 
   9   3   3   98.85   16.84 
   9   3   4   25.53    8.56 
   9  -3   4   21.99    8.86 
  -9  -3  -4   40.30   10.84 
   9   3   5   12.40    6.59 
   9  -3   5   18.86    8.43 
   9   3   6    3.87    4.61 
   9  -3   6    5.77    6.55 
   9   3   7    5.00    4.17 
   9  -3   7   14.24    7.48 
   9  -3   7    4.84    2.69 
   9   3   8    1.02    2.11 
   9  -3   8    2.11    3.10 
   9   3   9   -0.38    4.44 
   9  -3   9   -7.57    8.32 
   9   3  10    7.94    5.53 
   9  -3  10   -2.25    4.34 
   9   3  11    5.56    4.87 
   9  -3  11   -3.36    4.37 
   9   3  12   -5.56    5.85 
   9  -3  12   -5.30    5.53 
   9   3  13   -3.54    4.24 
   9  -3  13   -8.56    4.07 
   9   3  14   -9.02    8.59 
   9  -3  14   -5.42   10.57 
   9   3  15   11.50    7.15 
   9  -3  15   -2.48    7.29 
   9   3  16    1.47    3.62 
   9  -3  16  -15.83   12.26 
  -9  -4  23  -17.28   14.32 
  -9  -4  22   25.52   13.90 
   9   4 -21   -3.31    7.13 
   9   4 -20   -4.60    6.17 
   9   4 -19    9.02    7.42 
   9   4 -18   13.46   10.76 
   9   4 -17   -1.24    3.98 
   9   4 -16   11.97    8.51 
   9   4 -15    9.03    5.75 
   9   4 -14    0.91    3.92 
   9   4 -13    4.82    4.92 
  -9   4  13    5.83    3.56 
   9   4 -12    2.06    3.42 
  -9   4  12    1.42    3.49 
   9   4 -11    4.83    3.56 
  -9   4  11    3.81    2.18 
  -9   4  11    3.70    1.06 
   9   4 -10    2.48    2.73 
  -9   4  10   -0.37    1.71 
   9  -4 -10   -2.40    2.53 
  -9   4  10   -3.09    2.61 
  -9   4   9    7.28    2.60 
  -9   4   9    3.04    0.87 
   9   4  -9    7.54    4.73 
   9  -4  -9    5.45    2.85 
   9   4  -8    6.26    4.47 
  -9   4   8    7.33    2.52 
   9  -4  -8    8.41    3.20 
   9  -4  -7    3.74    2.60 
  -9   4   7    2.76    1.19 
   9   4  -7    3.47    4.12 
   9  -4  -7    5.91    2.66 
   9  -4  -6    2.02    1.69 
   9  -4  -6    4.62    2.32 
  -9   4   6    1.07    1.93 
   9   4  -6   -1.20    2.88 
   9  -4  -5   17.68    4.75 
   9  -4  -5   19.61    3.53 
  -9   4   5   13.23    4.48 
  -9  -4   5   10.05    6.51 
  -9   4   4   65.03    9.89 
  -9  -4   4   53.44   13.49 
   9  -4  -4   64.36    5.73 
   9  -4  -4   59.08    9.77 
  -9  -4   3   29.71    9.83 
  -9   4   3   40.14    8.77 
   9  -4  -3   32.59    3.94 
   9  -4  -3   27.05    7.01 
  -9  -4   2    6.81    4.33 
  -9   4   2   17.81    6.59 
   9  -4  -2    8.24    3.51 
  -9  -4   1    4.90    4.72 
  -9   4   1    7.56    3.98 
   9  -4  -1    1.14    3.96 
  -9  -4   0    5.12    4.87 
  -9   4   0   -1.69    3.89 
   9  -4   0   -3.66    4.23 
  -9  -4  -1    3.48    2.72 
   9  -4   1   -2.29    4.09 
  -9  -4  -2   -1.38    2.64 
   9  -4   2   -1.81    2.26 
  -9  -4  -3    6.67    4.00 
   9   4   3    6.58    4.68 
   9  -4   3    7.80    3.53 
   9  -4   3   12.38    7.17 
   9   4   4    2.06    4.53 
   9  -4   4    8.46    5.49 
   9  -4   4    0.10    1.83 
   9   4   5    6.28    4.81 
   9  -4   5   -0.18    1.71 
   9   4   6    4.05    3.78 
   9  -4   6    2.59    3.06 
   9  -4   6    8.84    5.07 
   9   4   7   -3.45    4.21 
   9  -4   7    0.69    3.11 
   9  -4   7   -3.44    5.12 
   9   4   8    2.59    3.29 
   9  -4   8   12.62    6.96 
   9   4   9    0.40    2.90 
   9  -4   9   -5.19    5.71 
   9   4  10    0.64    3.86 
   9  -4  10  -15.00    9.18 
   9   4  11   -6.91    4.78 
   9  -4  11    4.88    3.65 
   9   4  12    4.50    5.94 
   9  -4  12   21.45   10.60 
   9   4  13   -1.45    5.75 
   9  -4  13    5.46    8.51 
   9   4  14   -6.66    7.18 
   9  -4  14    1.87    4.64 
   9   4  15   -6.51    5.48 
   9  -4  15   -1.52    4.28 
  -9  -5  22   21.36    9.55 
   9   5 -21   -7.67    8.73 
   9   5 -20   -0.98    7.11 
   9   5 -19    4.31    4.66 
   9   5 -18   -7.74    7.33 
   9   5 -17    2.60    4.98 
   9   5 -16    2.28    3.57 
   9   5 -15   -0.66    3.75 
   9   5 -14   14.04    8.83 
   9   5 -13    5.32    8.68 
  -9   5  13    5.47    3.50 
   9   5 -12   23.52   10.11 
  -9   5  12   34.86    7.80 
   9   5 -11    7.17    5.76 
  -9   5  11   -0.48    1.47 
  -9   5  10   26.28    5.81 
   9   5 -10   14.76    6.36 
   9   5  -9   -1.32    2.55 
   9   5  -8   10.84    6.50 
   9  -5  -7    4.09    1.87 
  -9   5   7    5.87    2.78 
   9   5  -7    8.22    4.30 
   9  -5  -6   23.47    5.07 
  -9   5   6   22.98    5.31 
   9   5  -6   22.05    7.58 
   9  -5  -5    3.27    2.37 
  -9   5   5    5.85    3.22 
  -9   5   4    3.70    2.13 
   9  -5  -4   -0.97    2.47 
  -9   5   3    8.01    3.77 
   9  -5  -3   11.18    5.87 
  -9   5   2   -0.54    2.11 
   9  -5  -2    5.14    2.81 
   9  -5  -1   -1.10    1.97 
  -9   5   1   -3.23    1.77 
   9  -5   0   -0.09    1.45 
  -9   5   0   -6.61    4.81 
   9  -5   1    0.16    1.20 
   9  -5   1   -6.84    5.08 
   9  -5   2   12.43    3.89 
   9  -5   2   15.09    7.34 
   9  -5   3   -1.77    3.22 
   9  -5   3    0.66    2.79 
   9  -5   4   11.43    4.88 
   9  -5   4   14.44    6.31 
   9  -5   5    0.47    3.29 
   9  -5   5  -13.07    8.92 
   9  -5   6   -5.67    4.91 
   9  -5   6   -8.12    3.39 
   9  -5   7   -1.15    3.69 
   9   5   7   -3.04    4.02 
   9  -5   7   -4.83    2.85 
   9   5   8   -1.76    3.91 
   9  -5   8   -2.50    5.88 
   9   5   9    8.07    6.05 
   9  -5   9   13.71    6.31 
   9   5  10   -5.50    6.29 
   9  -5  10   -0.36    4.12 
   9   5  11   -0.14    4.81 
   9  -5  11    4.24    8.10 
   9   5  12   -4.33    6.27 
   9  -5  12   -2.51    3.37 
   9   5  13   13.52    9.54 
   9  -5  13   11.90   11.10 
   9  -5  14    8.20    9.83 
   9   6 -20    0.95   10.35 
   9   6 -19    2.98    6.92 
   9   6 -18   -8.54    8.44 
   9   6 -17  -11.16    9.16 
   9   6 -16   -7.77    9.03 
   9   6 -15   -2.86    3.71 
   9   6 -14    2.56    3.94 
   9   6 -13   15.28    7.85 
  -9   6  13    7.82    3.35 
  -9   6  12   45.29    8.22 
   9   6 -12   32.44   11.51 
   9   6 -11    5.35    6.17 
  -9   6  11    5.74    2.55 
   9   6 -10    9.20    7.36 
   9   6  -9   -3.91    5.42 
   9  -6  -8    1.12    1.03 
   9   6  -8   -3.34    3.23 
   9  -6  -7   -2.14    3.32 
   9   6  -7    2.59    3.71 
   9  -6  -6   11.40    2.97 
   9   6  -6   16.11    6.85 
   9   6  -5   -3.20    4.25 
   9  -6  -5   -0.24    1.70 
   9  -6  -4    4.47    2.17 
   9  -6  -3    7.20    2.94 
   9  -6  -2    3.52    3.37 
   9  -6  -1    1.18    2.74 
   9  -6   0   17.94    6.50 
   9  -6   1    6.36    1.27 
   9  -6   1   14.31    6.88 
   9  -6   2   -4.33    6.78 
   9  -6   2    1.34    1.71 
   9  -6   3   -0.94    1.21 
   9  -6   3   -2.58    4.79 
   9  -6   4    3.26    2.70 
   9  -6   4    0.82    5.04 
   9  -6   5    4.79    3.92 
   9  -6   5    3.69    5.69 
   9  -6   6    9.36    7.86 
   9  -6   7   18.61    6.66 
   9  -6   8    6.78    7.58 
   9  -6   9   -5.47    2.98 
   9  -6  10    6.13    6.29 
   9  -6  11   17.73   11.09 
   9  -6  12   -6.24   10.22 
   9  -6  13    3.81    7.23 
   9   7 -19   28.33   13.35 
   9   7 -18   15.17    8.27 
   9   7 -17   -3.27    4.96 
   9   7 -16    5.31    6.04 
   9   7 -15   -3.09    6.05 
   9   7 -14   -1.67    3.88 
   9   7 -13    1.40    3.06 
   9   7 -12   -0.84    3.34 
   9   7 -11    4.83    6.37 
   9   7 -10    8.01    7.29 
   9   7  -9   36.03   12.39 
   9  -7  -8   -0.77    2.62 
   9   7  -8    2.59    2.36 
   9  -7  -7   -0.20    2.02 
   9   7  -7    2.62    6.24 
   9  -7  -6    2.58    1.61 
   9   7  -6   -5.33    5.29 
   9   7  -5   -4.38    4.72 
   9  -7  -5   -2.39    3.43 
   9  -7  -4    1.76    2.33 
   9  -7  -3    7.50    4.06 
   9  -7  -2    7.19    3.02 
   9  -7  -1    5.65    2.87 
   9  -7   0   -6.71    6.88 
   9  -7   1    7.80    5.74 
   9  -7   2    6.69    6.91 
   9  -7   3   28.32    9.87 
   9  -7   4    1.57    5.37 
   9  -7   5   -1.62    3.62 
   9  -7   6   13.77    9.30 
   9  -7   7   15.48    9.67 
   9  -7   8    4.97    5.93 
   9  -7   9    1.04    4.38 
   9  -7  10   15.23   12.01 
   9  -7  11   15.05   10.09 
   9  -7  12   -8.81   11.86 
   9   8 -18   -7.86   10.56 
   9   8 -17   11.71   10.64 
   9   8 -16  -11.20   10.69 
   9   8 -15   -0.10    5.20 
   9   8 -14   -3.60    7.90 
   9   8 -13    3.65    4.40 
   9   8 -12    2.13    5.10 
   9   8 -11    5.16    6.65 
   9   8 -10   -4.94    7.08 
   9   8  -9    5.00    4.57 
   9   8  -8   17.74    8.66 
   9   8  -7   10.85    6.20 
   9  -8  -7    9.66    3.66 
   9   8  -6    6.99    4.39 
   9  -8  -6    5.63    2.94 
   9   8  -5    2.81    4.44 
   9  -8  -5    1.94    3.55 
   9  -8  -4   -0.39    2.29 
   9   8  -4    5.07    4.17 
   9  -8  -3   -1.69    3.69 
   9  -8  -2    5.41    4.19 
   9  -8  -1   13.46    7.70 
   9  -8   0   12.06    5.79 
   9  -8   1   -2.73    5.43 
   9  -8   2   -3.44    4.39 
   9  -8   3    7.10    5.99 
   9  -8   4   10.64    7.25 
   9  -8   5    7.87    8.88 
   9  -8   6   19.70    8.93 
   9  -8   7   -3.03    7.08 
   9  -8   8   -0.02    5.20 
   9  -8   9    6.03    3.99 
   9  -8  10   -3.07    8.53 
   9  -8  11   -9.13    5.40 
   9   9 -16   26.52   15.07 
   9   9 -15   -8.19    3.75 
   9   9 -14   -9.81   11.09 
   9   9 -13    1.73    7.60 
   9   9 -12    8.20    7.73 
   9   9 -11   -4.62    6.43 
   9   9 -10    5.51    5.34 
   9   9  -9    5.83    6.20 
   9   9  -8   -2.20    4.50 
   9   9  -7    2.74    5.71 
   9   9  -6    1.66    5.84 
   9   9  -5   -1.33    3.16 
   9  -9  -5   -2.52    3.38 
   9   9  -4   -1.89    6.66 
   9  -9  -4   -5.26    3.32 
   9   9  -3   11.03    6.49 
   9  -9  -3    9.43    4.64 
   9  -9  -2    3.18    3.25 
   9  -9  -1   -2.27    2.43 
   9  -9   0   10.35    6.54 
   9  -9   1   -8.29    5.15 
   9  -9   2   -9.43    6.52 
   9  -9   3   15.41    9.83 
   9  -9   4  -10.82    8.49 
   9  -9   5   -9.15    8.08 
   9  -9   6  -11.59    6.83 
   9  -9   7   -5.84    5.76 
   9  -9   8   14.31   11.52 
   9  -9   9  -21.15   14.57 
   9  10 -15   17.60   10.42 
   9  10 -14    3.27    7.34 
   9  10 -13    3.08    6.37 
   9  10 -12   22.84   11.36 
   9  10 -11  -14.01   12.02 
   9  10 -10    5.72   10.72 
   9  10  -9   13.27    7.43 
   9  10  -8   -4.53    7.88 
   9  10  -7    4.66    6.40 
   9  10  -6  -11.27    8.58 
   9  10  -5    3.07    7.54 
   9  10  -4    1.26    4.67 
   9  10  -3    0.62    5.40 
   9 -10  -2   -7.24    4.95 
   9  10  -2    6.13    4.38 
   9 -10  -1    9.93    7.32 
   9 -10   0    1.17    3.13 
   9 -10   1   -0.25    3.72 
   9 -10   2    3.14    3.09 
   9 -10   3  -14.78    8.04 
   9 -10   4   -3.84    7.59 
   9 -10   5  -15.59    9.52 
   9 -10   6   20.31   11.59 
   9 -10   7   24.06   15.85 
   9  11 -12    4.60    4.46 
   9  11 -11   -1.54    5.74 
   9  11 -10   -8.25    6.93 
   9  11  -9    5.97    7.81 
   9  11  -8    7.23    4.57 
   9  11  -7    3.53    7.37 
   9  11  -6    2.50    6.10 
   9  11  -5    2.95    3.98 
   9  11  -4    0.11    3.15 
   9  11  -3  -10.12    7.88 
   9  11  -2   15.65    8.75 
   9  11  -1    7.62    8.57 
   9 -11   1    1.12    5.12 
   9 -11   2   -7.74    9.66 
   9 -11   3    8.81    9.94 
   9 -11   4   26.87    9.70 
   9 -11   5    8.06   10.00 
 -10   0  21   -2.53    2.49 
  10   0 -21    1.96    6.42 
  10   0 -20    5.13    5.66 
  10   0 -19   -3.63    5.56 
  10   0 -18   -1.39    5.28 
  10   0 -17   -3.87    4.88 
  10   0 -16    0.56    2.95 
  10   0 -15   -6.78    6.65 
  10   0 -14   13.56    5.10 
  10   0 -13    3.15    4.85 
  10   0 -12   39.65   10.69 
 -10   0  11   -0.97    2.26 
  10   0 -11    3.07    4.51 
 -10   0  10    1.42    2.50 
  10   0 -10   -4.16    3.80 
  10   0  -9    0.18    2.05 
 -10   0   9    1.24    3.00 
 -10   0   8   20.62    6.37 
  10   0  -8   22.03    6.77 
 -10   0   7   -3.02    3.57 
  10   0  -7   -1.11    2.01 
 -10   0   6   12.03    5.04 
  10   0  -6    9.43    4.08 
 -10   0   5   -0.13    2.83 
  10   0  -5   -0.66    2.24 
 -10   0   4  321.43   25.51 
 -10   0   3    2.32    2.30 
 -10   0   2   53.29   10.87 
 -10   0   1    1.10    2.51 
 -10   0   0   -0.42    1.83 
 -10   0  -1    1.25    4.59 
 -10   0  -2    2.43    2.80 
  10   0   3   -2.04    3.38 
 -10   0  -3   -7.13    6.04 
  10   0   4   -0.23    2.29 
  10   0   5    0.26    4.41 
  10   0   6    0.85    2.98 
  10   0   7    2.91    3.34 
  10   0   8    4.00    4.80 
  10   0   9   -2.88    2.48 
  10   0  10   -8.47    8.75 
  10   0  11    1.29    7.53 
  10   0  12    1.45    3.96 
  10   0  13    0.02    8.23 
  10   0  14   -9.22    7.48 
  10   0  15   -1.49    3.63 
  10   0  16    2.42    3.44 
  10   0  17   -0.23    7.14 
 -10  -1  22   -7.04    3.41 
  10   1 -22   -6.45    4.58 
  10   1 -21   -4.59    3.29 
 -10   1  20    4.09    4.06 
  10  -1 -20   -9.29    8.83 
  10   1 -20   -1.72    4.58 
  10  -1 -19   -3.07    5.87 
  10   1 -19    4.92    6.46 
  10   1 -18   11.24    9.49 
  10  -1 -18   13.41    6.85 
  10   1 -17   16.23    9.39 
  10  -1 -17   17.64    8.77 
  10   1 -16   -5.88    6.95 
  10  -1 -16   -4.68    4.92 
  10  -1 -15   -0.90    2.86 
  10   1 -15   -0.98    2.84 
  10  -1 -14    9.31    5.39 
  10   1 -14    1.80    2.90 
 -10   1  14   11.01    4.97 
  10  -1 -13    1.88    2.72 
  10   1 -13   -4.35    4.10 
 -10   1  13    1.49    3.99 
  10  -1 -12   12.04    6.03 
 -10   1  12    8.68    5.64 
 -10   1  12    5.99    4.77 
  10   1 -12    5.73    3.38 
 -10   1  11    4.25    3.13 
  10  -1 -11    1.18    3.42 
  10   1 -11    1.83    2.88 
 -10   1  11    4.25    2.17 
  10   1 -10    0.37    2.87 
 -10   1  10    5.03    3.72 
  10  -1 -10   -0.08    3.44 
 -10   1   9    9.85    4.34 
  10   1  -9   14.35    6.01 
 -10  -1   9   13.59    6.12 
  10  -1  -9   10.51    5.33 
  10   1  -8   12.49    4.96 
 -10   1   8   10.61    3.74 
  10  -1  -8   14.59    5.85 
 -10  -1   8   11.69    4.33 
 -10   1   7    3.28    2.65 
 -10  -1   7    7.59    4.54 
  10  -1  -7    2.76    2.69 
  10   1  -7    8.87    4.00 
 -10   1   6   24.11    6.70 
  10   1  -6   25.84    7.36 
 -10  -1   6   28.87    8.33 
  10  -1  -6   23.70    7.11 
  10  -1  -6   27.43    6.83 
  10  -1  -5   26.26    6.47 
 -10   1   5   28.21    7.38 
 -10  -1   5   39.41    9.30 
  10  -1  -5   36.02    8.38 
 -10  -1   4   29.95    8.20 
  10  -1  -4   23.91    6.66 
 -10   1   4   24.06    6.59 
 -10  -1   3   42.53    9.04 
  10  -1  -3   35.73    9.16 
 -10   1   3   40.88    8.51 
 -10  -1   2   74.29   12.43 
 -10   1   2   79.92   12.90 
 -10  -1   1   -0.78    1.74 
 -10   1   1    2.01    2.57 
 -10   1   0   31.00    9.17 
 -10  -1   0   31.65    8.77 
 -10   1  -1    9.80    5.19 
 -10  -1  -1    3.84    3.36 
  10   1   2    5.90    4.01 
 -10   1  -2   11.54    6.78 
 -10  -1  -2    1.61    2.55 
  10   1   3   16.60    6.85 
 -10  -1  -3   15.30    6.25 
  10   1   4   12.13    5.79 
  10  -1   4    9.09    5.04 
  10   1   5    6.25    4.65 
  10  -1   5    4.18    3.88 
  10   1   6    1.76    3.06 
  10  -1   6    5.44    5.22 
  10   1   7   -0.14    3.34 
  10  -1   7   -2.70    5.25 
  10   1   8    6.29    5.80 
  10  -1   8    4.55    5.91 
  10   1   9    5.54    4.67 
  10  -1   9   -0.71    4.23 
  10   1  10    4.51    4.28 
  10  -1  10   11.23    7.97 
  10   1  11   27.67   10.98 
  10  -1  11   29.33   11.86 
  10   1  12    1.87    4.35 
  10  -1  12    2.08    4.69 
  10   1  13    6.03    7.44 
  10  -1  13    1.64    3.55 
  10   1  14    6.75    6.47 
  10  -1  14   12.51   10.85 
  10   1  15    3.75    4.45 
  10  -1  15   10.64    7.50 
  10   1  16   11.36    5.27 
  10  -1  16    7.20    5.02 
  10   1  17    3.50    6.41 
  10  -1  17   14.08   12.95 
  10   1  18   -1.26    7.66 
 -10  -2  23   -7.74    5.33 
 -10  -2  22    5.14    5.99 
  10   2 -22  -14.73   10.35 
  10   2 -21   -6.55    9.03 
  10   2 -20  -10.07   10.74 
  10   2 -19    5.24    3.97 
  10   2 -18    5.80    6.90 
 -10   2  18    0.85    1.81 
  10  -2 -18    1.85    2.77 
  10   2 -17   19.08    9.96 
  10  -2 -17   22.90   10.03 
  10   2 -16    7.31    6.90 
 -10   2  16   19.18    6.56 
  10  -2 -16   18.69    8.99 
  10   2 -15    7.94    5.51 
 -10   2  15    5.43    3.57 
  10  -2 -15    5.91    4.39 
 -10   2  14    5.28    3.75 
  10   2 -14   15.34    7.88 
  10  -2 -14   16.55    7.63 
  10  -2 -13   21.21    8.05 
 -10   2  13   22.41    6.39 
  10   2 -13   26.42    8.41 
 -10   2  12   -3.27    4.74 
  10  -2 -12   -3.65    3.41 
 -10   2  12   -0.22    1.47 
  10   2 -12    1.38    3.86 
  10   2 -11   -0.46    3.25 
 -10   2  11    0.45    1.98 
 -10   2  11    2.66    1.59 
  10  -2 -11    4.47    4.19 
 -10   2  10   19.27    5.19 
  10   2 -10   12.17    6.03 
  10  -2 -10   14.44    5.98 
 -10   2   9   -3.43    3.79 
  10  -2  -9    1.80    1.88 
  10   2  -9   -0.31    1.82 
 -10   2   8    8.03    4.50 
  10   2  -8    6.77    3.80 
  10  -2  -8    7.21    3.39 
 -10  -2   8    5.98    5.41 
 -10   2   7    9.48    3.39 
  10   2  -7    5.05    3.57 
  10  -2  -7    7.69    4.12 
 -10  -2   7    5.47    5.19 
 -10  -2   6   11.01    6.53 
  10  -2  -6   11.84    4.64 
  10   2  -6    6.87    4.92 
  10  -2  -6   11.61    4.17 
 -10   2   6    2.66    2.53 
  10  -2  -5    3.64    2.56 
 -10  -2   5    4.26    6.58 
 -10   2   5    3.28    2.72 
  10  -2  -5    6.08    2.84 
 -10  -2   4    5.42    4.08 
 -10   2   4    0.04    1.79 
  10  -2  -3   -0.23    3.12 
 -10  -2   3    3.28    2.68 
 -10   2   3   -1.66    3.32 
  10  -2  -2   25.04    7.56 
 -10  -2   2   27.15    7.79 
 -10   2   2   26.00    7.33 
  10  -2  -1   42.25    9.35 
 -10  -2   1   45.73   11.67 
 -10   2   1   52.36   10.62 
  10  -2   0   10.58    5.69 
 -10  -2   0    6.21    3.46 
 -10   2   0   12.04    6.30 
 -10  -2  -1    3.08    2.81 
  10   2   1   11.56    6.18 
 -10   2  -1    4.72    5.20 
  10  -2   1    0.07    2.58 
  10   2   2    9.35    4.50 
 -10   2  -2   20.43    8.93 
 -10  -2  -2   18.51    7.38 
  10  -2   2    6.50    5.13 
  10   2   3   13.48    6.53 
  10  -2   3    7.92    4.60 
  10   2   4    5.24    3.23 
  10  -2   4   -0.73    2.33 
  10   2   5    6.88    5.00 
  10  -2   5    5.12    4.67 
  10   2   6    3.46    6.79 
  10  -2   6   -4.87    4.11 
  10   2   7    6.43    5.43 
  10  -2   7    2.12    3.81 
  10   2   8   -2.11    2.96 
  10  -2   8   -1.56    4.03 
  10   2   9    0.40    2.58 
  10  -2   9   20.34    9.34 
  10   2  10    7.95    6.78 
  10  -2  10   19.54    7.62 
  10   2  11   11.72    8.85 
  10  -2  11   12.56    8.98 
  10   2  12    1.54    5.20 
  10  -2  12   -0.63    5.88 
  10   2  13   -6.82    5.41 
  10  -2  13   -2.06    6.21 
  10   2  14    7.65    4.55 
  10  -2  14   11.09    8.42 
  10   2  15   14.67    6.98 
  10  -2  15    3.00    4.32 
  10   2  16   -4.78    5.91 
  10  -2  16   13.96   10.08 
  10   2  17    5.46    4.77 
 -10  -3  24  -18.17   12.44 
 -10  -3  23   17.44    9.95 
  10   3 -22    2.78    6.53 
  10   3 -21   -3.53    7.73 
  10   3 -20   -7.19    6.32 
  10   3 -19   -5.05    5.71 
  10   3 -18   -1.09    4.12 
  10   3 -17    6.17    8.09 
  10   3 -16    6.32    5.66 
 -10   3  15    4.11    3.92 
  10   3 -15   12.73    7.00 
  10  -3 -15   22.72    7.92 
 -10   3  14   -0.49    1.83 
  10   3 -14    0.88    3.61 
  10  -3 -14    0.07    2.09 
 -10   3  13   -1.13    2.74 
 -10   3  13   -0.24    4.33 
  10   3 -13    3.26    3.24 
  10  -3 -13   -0.72    3.16 
 -10   3  12    1.00    2.31 
 -10   3  12   -5.72    4.22 
  10   3 -12    0.32    4.01 
  10  -3 -12    1.69    2.83 
  10  -3 -11    3.37    2.94 
  10   3 -11   -0.31    3.38 
 -10   3  11    1.98    2.30 
 -10   3  11    2.16    1.97 
  10  -3 -10   -0.69    2.53 
 -10   3  10    1.01    1.34 
  10   3  -9   13.98    6.75 
  10  -3  -9    9.15    4.25 
 -10   3   9    8.97    3.29 
  10   3  -8    1.46    2.61 
  10  -3  -8    3.36    2.78 
 -10   3   8   -3.20    2.59 
  10   3  -7    3.21    3.80 
  10  -3  -7    8.19    4.37 
 -10  -3   7    3.22    4.36 
  10  -3  -7    3.81    2.14 
 -10   3   7   10.05    3.94 
  10  -3  -6    3.44    2.17 
  10   3  -6   -2.76    4.11 
  10  -3  -6    2.96    2.73 
 -10  -3   6    1.83    3.10 
 -10   3   6    1.41    3.03 
  10  -3  -5    6.07    3.50 
 -10  -3   5    2.20    3.41 
  10  -3  -5    2.38    1.33 
 -10   3   5   11.53    4.88 
  10  -3  -4    5.22    2.47 
 -10  -3   4    2.11    2.60 
 -10   3   4    5.47    2.32 
  10  -3  -4    7.16    3.10 
  10  -3  -3   -0.92    2.76 
 -10  -3   3   -4.24    4.72 
 -10   3   3    3.36    3.18 
  10  -3  -2   14.42    4.76 
 -10  -3   2   16.83    5.92 
 -10   3   2   24.02    7.09 
 -10  -3   1   13.02    6.33 
 -10   3   1   20.96    6.37 
  10  -3  -1   17.11    6.01 
 -10  -3   0   15.24    6.48 
 -10   3   0   19.29    6.99 
  10   3   0    6.63    2.50 
  10  -3   0   16.56    6.68 
 -10  -3  -1    1.88    4.08 
  10   3   1   11.17    6.15 
 -10   3  -1    5.54    5.11 
  10  -3   1    0.39    2.18 
  10   3   2   40.31   11.34 
  10  -3   2   44.82   11.58 
  10   3   3    3.23    4.92 
  10  -3   3    5.27    5.13 
  10   3   4    0.48    2.09 
  10  -3   4   -3.32    5.36 
  10   3   5    5.00    4.41 
  10  -3   5    4.11    4.17 
  10   3   6    2.28    3.71 
  10  -3   6    7.60    6.83 
  10   3   7   -2.96    2.70 
  10  -3   7   -1.32    2.47 
  10   3   8   -5.25    4.84 
  10  -3   8    4.70    4.34 
  10   3   9    6.22    6.13 
  10  -3   9    6.67    6.48 
  10   3  10    6.07    3.46 
  10  -3  10   -1.82    5.78 
  10   3  11    5.42    4.50 
  10  -3  11    8.69    3.88 
  10   3  12   -4.23    5.79 
  10  -3  12   -8.34    8.77 
  10   3  13   -5.89    7.50 
  10  -3  13   -5.40    6.24 
  10   3  14    8.91    9.14 
  10  -3  14    6.16    9.48 
  10   3  15    1.88    7.19 
  10  -3  15  -10.40   12.58 
  10   3  16    0.16    5.54 
 -10  -4  23  -16.54    5.03 
  10   4 -21   -6.03    7.61 
  10   4 -20    2.34    3.06 
  10   4 -19    5.17    6.64 
  10   4 -18    0.19    5.68 
  10   4 -17    1.25    3.46 
  10   4 -16    4.04    3.77 
  10   4 -15    2.25    6.28 
  10   4 -14   -6.32    6.57 
 -10   4  13    7.03    5.34 
 -10   4  13    0.81    0.89 
  10   4 -13    1.07    4.08 
 -10   4  12    3.00    0.84 
  10  -4 -12    6.62    3.58 
 -10   4  12    9.15    2.70 
  10   4 -12    6.37    5.48 
  10   4 -11    4.51    4.44 
 -10   4  11    0.64    1.88 
  10  -4 -11    4.62    2.74 
 -10   4  11    4.03    1.54 
  10   4 -10   15.18    6.82 
 -10   4  10   15.25    3.28 
  10  -4 -10   28.01    6.52 
 -10   4   9   28.74    5.77 
  10   4  -9   36.95   10.46 
  10  -4  -9   27.31    6.21 
  10   4  -8    4.86    3.57 
 -10   4   8    2.29    2.36 
  10  -4  -8    5.82    2.78 
  10  -4  -7    1.77    1.95 
  10   4  -7   -2.40    3.76 
  10  -4  -7   -0.01    1.45 
 -10   4   7   -0.68    1.52 
  10   4  -6   -0.45    3.02 
  10  -4  -6    2.05    2.25 
  10  -4  -6    2.08    1.00 
 -10   4   6   -0.83    1.32 
  10  -4  -5    4.56    1.34 
  10  -4  -5    4.42    2.41 
 -10   4   5    0.07    2.09 
  10  -4  -4   17.64    5.34 
  10  -4  -4   21.54    3.73 
 -10   4   4   19.15    5.87 
 -10   4   3   84.18   13.00 
  10  -4  -3   69.18   11.55 
  10  -4  -3   76.92    7.26 
 -10   4   2   20.08    5.99 
  10  -4  -2   20.25    6.59 
 -10   4   1   -2.90    4.26 
  10  -4  -1    2.49    1.75 
 -10   4   0   13.61    7.31 
  10  -4   0    4.41    4.28 
  10  -4   1   -3.65    5.86 
  10  -4   2   -0.30    2.32 
  10   4   3    7.68    6.50 
  10  -4   3   20.64    8.51 
  10   4   4    1.74    3.69 
  10  -4   4    2.36    3.20 
  10  -4   4    3.72    4.19 
  10   4   5   15.73    7.40 
  10  -4   5   32.96    9.05 
  10  -4   5   16.96    7.92 
  10   4   6   -3.77    5.00 
  10  -4   6   -4.57    3.57 
  10  -4   6    7.93    3.92 
  10   4   7   -6.49    5.90 
  10  -4   7   -3.76    6.05 
  10   4   8   -1.66    4.24 
  10  -4   8    1.11    2.93 
  10   4   9    5.46    5.85 
  10  -4   9   -2.34    6.23 
  10   4  10   -0.62    3.00 
  10  -4  10   -1.23    3.13 
  10   4  11  -10.76    7.94 
  10  -4  11    3.07    6.49 
  10   4  12   -4.26    7.58 
  10  -4  12   13.41    9.08 
  10   4  13    0.84    6.66 
  10  -4  13    8.54    3.46 
  10   4  14    1.18    5.45 
  10  -4  14   -2.58   10.07 
  10   4  15   18.78   10.26 
  10  -4  15   -8.77   10.22 
  10   5 -21    6.42    7.17 
  10   5 -20   -0.47    5.06 
  10   5 -19  -16.18   10.58 
  10   5 -18   -1.14    4.96 
  10   5 -17   -1.20    8.41 
  10   5 -16  -10.61    8.38 
  10   5 -15   -5.98    4.68 
  10   5 -14   12.18    8.77 
 -10   5  13   23.16    7.34 
  10   5 -13   21.09    9.95 
  10   5 -12   21.49    9.93 
 -10   5  12   36.75    8.19 
  10   5 -11   48.97   13.43 
 -10   5  11   62.52   10.33 
  10   5 -10    1.90    4.56 
 -10   5   9   -0.29    1.48 
  10   5  -9    2.31    4.43 
  10   5  -8   15.59    6.98 
 -10   5   8    4.95    3.00 
  10  -5  -8    4.20    2.42 
  10   5  -7   29.93    9.39 
  10  -5  -7   32.66    7.06 
 -10   5   7   22.02    4.33 
  10  -5  -6   -0.07    2.01 
 -10   5   6    2.49    2.75 
  10   5  -6    3.09    3.60 
  10  -5  -5    3.01    1.89 
 -10   5   5    3.93    3.96 
  10  -5  -4   -0.52    2.48 
 -10   5   4    3.40    2.78 
 -10   5   3   37.26    8.95 
  10  -5  -3   25.71    7.81 
 -10   5   2   18.32    6.29 
  10  -5  -2   11.35    5.27 
 -10   5   1   -1.04    3.51 
  10  -5  -1    0.07    0.96 
  10  -5  -1   -3.00    4.39 
  10  -5   0    2.56    3.42 
  10  -5   0    3.88    1.98 
  10  -5   1    4.18    3.29 
  10  -5   1   10.57    2.65 
  10  -5   2    4.10    4.68 
  10  -5   2    7.54    3.86 
  10  -5   3   10.15    7.69 
  10  -5   3    2.99    1.79 
  10  -5   4   -1.88    3.42 
  10  -5   4   -0.78    3.48 
  10  -5   5   62.37   10.62 
  10  -5   5   60.38   14.66 
  10  -5   6    2.38    2.43 
  10   5   6    6.82    7.00 
  10  -5   6    4.66    5.34 
  10   5   7   -0.07    4.04 
  10  -5   7    3.49    5.54 
  10   5   8    0.18    2.54 
  10  -5   8    4.82    5.20 
  10   5   9   -5.66    6.22 
  10  -5   9   34.74   13.80 
  10   5  10  -10.43    6.48 
  10  -5  10  -16.96    9.51 
  10   5  11    2.94    5.49 
  10  -5  11    7.59    5.84 
  10   5  12    6.31    6.71 
  10  -5  12    7.88    5.90 
  10   5  13    1.88    7.09 
  10  -5  13    4.08    5.59 
  10  -5  14   -5.29    9.26 
  10   6 -20   -8.97    8.81 
  10   6 -19   -0.85    4.33 
  10   6 -18    3.98    7.35 
  10   6 -17   11.75    8.83 
  10   6 -16    1.23    5.20 
  10   6 -15   25.09   11.42 
  10   6 -14   -2.20    8.43 
  10   6 -13   15.84    8.03 
 -10   6  12   10.69    5.74 
  10   6 -12   -4.65    4.75 
  10   6 -11   18.32    8.91 
  10   6 -10   33.75   11.60 
  10   6  -9   10.92    6.27 
  10   6  -8   -1.70    3.00 
  10  -6  -8   -2.15    2.00 
  10  -6  -7    0.01    2.29 
  10   6  -7   -6.01    6.39 
  10   6  -6    4.56    5.10 
  10  -6  -6    2.55    2.41 
  10  -6  -5    0.14    1.59 
  10  -6  -4   10.58    5.13 
  10  -6  -3   -0.83    3.41 
  10  -6  -2   13.09    5.26 
  10  -6  -1    6.21    2.81 
  10  -6   0    3.77    4.58 
  10  -6   1    0.40    0.90 
  10  -6   1    9.79    6.55 
  10  -6   2  121.62   19.78 
  10  -6   2  139.89   11.02 
  10  -6   3   37.76    6.53 
  10  -6   3   38.75   11.74 
  10  -6   4    5.86    7.07 
  10  -6   5   42.45   12.41 
  10  -6   6   10.78    7.37 
  10  -6   7  -12.53    9.69 
  10  -6   8   -7.55    8.09 
  10  -6   9    1.25    3.74 
  10  -6  10    6.90    8.44 
  10  -6  11   -6.31    6.79 
  10  -6  12    3.16    8.10 
  10   7 -19   13.97    4.79 
  10   7 -18    3.64    6.70 
  10   7 -17   14.97    8.39 
  10   7 -16    0.68    3.18 
  10   7 -15    9.00    6.37 
  10   7 -14   10.06    9.09 
  10   7 -13   -0.47    6.32 
  10   7 -12    0.19    4.57 
  10   7 -11   11.23    6.47 
  10   7 -10   -4.92    5.35 
  10   7  -9    7.68    2.77 
  10   7  -8    4.06    6.16 
  10  -7  -8    5.09    2.74 
  10  -7  -7    9.01    4.47 
  10   7  -7   13.38    7.28 
  10  -7  -6   24.41    5.87 
  10   7  -6   21.78    8.29 
  10   7  -5    3.34    2.55 
  10  -7  -5    9.12    4.42 
  10  -7  -4    0.54    2.75 
  10  -7  -3    4.57    4.01 
  10  -7  -2    0.81    3.80 
  10  -7  -1   18.92    7.55 
  10  -7   0   37.48   10.92 
  10  -7   1    3.48    3.37 
  10  -7   2    3.70    2.64 
  10  -7   3    6.26    4.93 
  10  -7   4   21.09    9.18 
  10  -7   5   15.39    9.18 
  10  -7   6    1.62    6.22 
  10  -7   7    9.44    6.27 
  10  -7   8    8.78    6.00 
  10  -7   9    1.54    5.48 
  10  -7  10   -2.35    7.91 
  10  -7  11   10.47    8.96 
  10   8 -17   -7.84    6.50 
  10   8 -16   10.69    8.04 
  10   8 -15   -1.43    4.94 
  10   8 -14   -1.50    5.15 
  10   8 -13    8.81    7.17 
  10   8 -12   -0.49    6.57 
  10   8 -11   -6.26    5.75 
  10   8 -10   11.10    9.64 
  10   8  -9   -5.52    5.90 
  10   8  -8    2.86    6.54 
  10  -8  -7    7.25    3.23 
  10   8  -7   13.71    8.79 
  10  -8  -6    0.84    1.91 
  10   8  -6    9.07    6.89 
  10   8  -5   -6.35    6.30 
  10  -8  -5    2.21    2.73 
  10   8  -4    1.63    2.66 
  10  -8  -4    0.83    1.91 
  10  -8  -3   -0.61    3.13 
  10  -8  -2    0.30    2.54 
  10  -8  -1    3.17    6.07 
  10  -8   0   -4.16    4.20 
  10  -8   1   -1.66    3.40 
  10  -8   2   -2.04    6.80 
  10  -8   3  -10.22    7.64 
  10  -8   4    9.86   10.06 
  10  -8   5    2.62    3.25 
  10  -8   6    8.84    8.12 
  10  -8   7   -2.51    5.73 
  10  -8   8   13.36   10.36 
  10  -8   9    1.60    4.81 
  10  -8  10    2.35    7.30 
  10   9 -16  -31.89   17.26 
  10   9 -15   -9.53    7.21 
  10   9 -14  -11.23    9.30 
  10   9 -13    4.03    6.63 
  10   9 -12    0.23    4.89 
  10   9 -11   -5.75    9.13 
  10   9 -10  -13.21    8.63 
  10   9  -9    2.04    3.99 
  10   9  -8   -3.25    8.18 
  10   9  -7    5.77    5.56 
  10   9  -6    5.60    3.39 
  10  -9  -5    8.55    5.12 
  10   9  -5    0.83    4.24 
  10  -9  -4   -0.67    5.83 
  10   9  -4    3.48    5.60 
  10   9  -3    8.06    6.07 
  10  -9  -3   -1.97    3.52 
  10  -9  -2    3.62    5.52 
  10  -9  -1   -5.40    6.21 
  10  -9   0    7.96    6.25 
  10  -9   1    5.88    5.75 
  10  -9   2    6.45    5.62 
  10  -9   3    4.39    5.92 
  10  -9   4   -7.88    8.41 
  10  -9   5   -2.55    7.21 
  10  -9   6    3.22    4.83 
  10  -9   7  -12.40   10.82 
  10  -9   8   -7.40    6.20 
  10  10 -14    0.14    7.33 
  10  10 -13   -5.25    8.35 
  10  10 -12   -8.14    5.67 
  10  10 -11  -16.08   10.93 
  10  10 -10  -13.83   11.50 
  10  10  -9   13.36    8.93 
  10  10  -8   -6.41    8.72 
  10  10  -7    8.53    6.76 
  10  10  -6    4.32    4.47 
  10  10  -5    7.03    6.36 
  10  10  -4    3.10    5.20 
  10  10  -3    4.05    4.67 
  10  10  -2   -6.98    4.69 
  10 -10  -2  -13.64    9.87 
  10 -10  -1  -11.48    6.92 
  10 -10   0   -1.30    6.40 
  10 -10   1    7.86    4.02 
  10 -10   2    3.92    7.21 
  10 -10   3    2.52    4.02 
  10 -10   4    6.63    6.96 
  10 -10   5    5.45    8.16 
  10 -10   6    5.77    6.07 
  10  11 -11  -17.67   11.38 
  10  11 -10  -15.90   10.55 
  10  11  -9   -6.47    4.15 
  10  11  -8   10.36   11.43 
  10  11  -7  -12.42   10.14 
  10  11  -6    5.71    7.71 
  10  11  -5    0.47    3.52 
  10  11  -4   -2.57    8.23 
  10  11  -3   -0.47    5.24 
  10  11  -2   -0.78    7.27 
  10  11  -1   -2.88    6.09 
  10 -11   1    7.53    3.07 
  10 -11   2  -13.32   12.05 
  10 -11   3   34.07   15.69 
  10 -11   4   -5.76    6.64 
  10 -11   5   -5.13    4.95 
  11   0 -22   10.55    9.89 
  11   0 -21   -0.88    5.09 
  11   0 -20   -2.34    5.98 
  11   0 -19    2.02    3.74 
  11   0 -18   13.50    8.95 
  11   0 -17    4.45    4.45 
  11   0 -16   -0.17    5.39 
  11   0 -15    0.20    2.67 
  11   0 -14   -1.13    4.47 
  11   0 -13   -4.47    4.65 
 -11   0  13   -1.98    3.87 
 -11   0  12  105.56   15.92 
  11   0 -12   68.99   14.76 
 -11   0  11    6.97    3.63 
  11   0 -11    3.19    3.46 
  11   0 -10    0.69    2.04 
 -11   0  10   -5.53    4.18 
 -11   0   9   -2.02    4.39 
  11   0  -9    0.65    1.68 
 -11   0   8   43.49   10.12 
  11   0  -8   25.98    7.31 
 -11   0   7   -1.64    2.30 
  11   0  -7   -2.86    3.05 
 -11   0   6   95.08   14.26 
  11   0  -6   83.74   12.50 
 -11   0   5    1.01    1.79 
  11   0  -5    1.29    3.41 
 -11   0   4  338.10   26.87 
  11   0  -4  304.74   26.85 
 -11   0   3    0.92    2.22 
 -11   0   2    0.45    4.71 
 -11   0   1   -3.90    4.76 
 -11   0   0    9.86    7.21 
 -11   0  -1   -0.80    2.76 
  11   0   2   22.26    7.94 
  11   0   3    0.95    1.74 
  11   0   4   -1.58    1.93 
  11   0   5    0.25    3.71 
  11   0   6   14.45    7.39 
  11   0   7    2.95    4.47 
  11   0   8    2.48    4.91 
  11   0   9    1.79    3.30 
  11   0  10  107.77   21.41 
  11   0  11   -0.74    4.13 
  11   0  12    8.73    6.02 
  11   0  13   19.23    9.92 
  11   0  14   -4.21    8.67 
  11   0  15  -10.49   13.12 
  11   0  16   -0.94    6.10 
  11   1 -23    1.91    4.32 
  11   1 -22    5.11    7.26 
  11  -1 -21  -10.06    8.11 
  11   1 -21    0.62    6.45 
  11  -1 -20   -6.35    5.14 
  11   1 -20  -19.45   11.33 
  11  -1 -19   -1.79    6.30 
  11   1 -19  -13.41   10.34 
  11   1 -18   15.32    9.70 
  11  -1 -18   12.48    8.16 
  11   1 -17    4.12    3.48 
  11  -1 -17    9.79    6.68 
  11  -1 -16    6.65    8.35 
  11   1 -16   10.39    6.48 
 -11   1  16   10.21    2.94 
  11  -1 -15    7.72    6.56 
  11   1 -15    4.10    5.76 
 -11   1  15   22.60    7.96 
  11  -1 -14    4.34    4.16 
  11   1 -14    4.60    2.33 
 -11   1  14    8.41    4.23 
  11  -1 -13    7.24    4.45 
 -11   1  13    8.53    4.46 
  11   1 -13    2.16    3.13 
 -11   1  12    8.72    5.79 
  11  -1 -12    2.30    3.13 
  11   1 -12    5.67    4.13 
  11   1 -11   13.77    6.54 
 -11   1  11    8.79    3.93 
 -11  -1  11   15.61    7.75 
  11  -1 -11    9.04    4.99 
 -11   1  10    6.13    3.95 
  11   1 -10    3.76    4.21 
 -11  -1  10    4.77    3.23 
  11  -1 -10    6.49    4.29 
  11  -1  -9   34.06    8.63 
 -11   1   9   32.46    7.87 
 -11  -1   9   31.86    9.75 
  11   1  -9   27.63    8.80 
 -11   1   8   20.36    6.27 
  11   1  -8   21.72    7.22 
 -11  -1   8   26.49    8.57 
  11  -1  -8   19.79    6.38 
 -11   1   7    3.59    3.65 
  11  -1  -7    2.08    2.91 
  11   1  -7    0.67    3.10 
 -11  -1   7   -3.10    4.78 
 -11   1   6   -2.12    3.01 
 -11  -1   6    2.40    2.44 
  11  -1  -6   -1.35    2.10 
  11  -1  -6    3.40    3.05 
 -11   1   5    4.33    3.42 
 -11  -1   5    6.00    2.98 
  11  -1  -5    4.05    3.13 
 -11   1   4  108.88   14.93 
 -11  -1   4   98.41   15.58 
  11  -1  -4  108.44   14.88 
 -11   1   3   84.23   13.54 
 -11  -1   3   83.76   13.92 
  11  -1  -3   65.43   11.71 
 -11  -1   2   -1.95    1.89 
  11  -1  -2    1.81    3.31 
 -11   1   2   -1.42    3.14 
 -11  -1   1   25.36    8.61 
  11  -1  -1   23.46    8.16 
 -11   1   1   24.20    7.05 
 -11   1   0    3.47    5.44 
 -11  -1   0    1.77    3.45 
  11  -1   1    6.36    3.37 
  11   1   1    0.06    1.84 
 -11   1  -1    2.24    2.96 
  11  -1   2   -1.92    3.18 
  11   1   2    4.38    3.15 
  11  -1   3   13.80    6.47 
  11   1   3   10.22    4.98 
  11  -1   4    4.52    3.19 
  11   1   4    7.14    5.19 
  11  -1   5    9.09    5.14 
  11   1   5   13.25    7.48 
  11   1   6   10.33    7.74 
  11  -1   6   11.04    6.78 
  11   1   7    1.34    3.51 
  11  -1   7    1.37    2.64 
  11   1   8   -0.62    5.76 
  11  -1   8    4.58    5.25 
  11   1   9   -3.11    4.75 
  11  -1   9   -8.38    7.61 
  11   1  10    0.84    3.73 
  11  -1  10    6.95    6.95 
  11   1  11    0.86    2.86 
  11  -1  11    1.33    5.79 
  11   1  12   -6.39    5.61 
  11  -1  12    2.33    8.74 
  11   1  13    4.64    6.76 
  11  -1  13   -0.76    8.32 
  11   1  14   16.57    8.35 
  11  -1  14    5.25    6.98 
  11   1  15  -11.03    9.59 
  11  -1  15   -6.68    8.09 
  11   1  16   -3.71    5.48 
  11  -1  16   20.62   14.10 
  11   1  17   30.03   15.85 
  11   2 -22   16.41    9.86 
  11   2 -21   -9.80    3.62 
  11   2 -20   -0.06    7.39 
  11   2 -19    4.93    3.78 
  11  -2 -19    0.55    3.98 
  11   2 -18    4.40    6.10 
  11  -2 -18   28.47   10.71 
  11   2 -17   35.07   12.54 
  11  -2 -17   16.89    7.62 
  11   2 -16   15.61    9.41 
 -11   2  16   18.39    5.93 
  11  -2 -16   21.50    9.33 
 -11   2  15    9.49    4.31 
  11   2 -15    3.50    5.37 
  11  -2 -15    5.80    4.18 
  11  -2 -14   -0.50    2.03 
 -11   2  14    2.65    3.57 
  11   2 -14    4.23    3.08 
  11  -2 -13   11.99    5.68 
 -11   2  13   -0.96    4.05 
  11   2 -13    7.49    5.76 
 -11   2  12   12.57    3.32 
 -11   2  12   13.42    5.08 
  11  -2 -12   16.22    6.53 
  11   2 -12   20.30    8.32 
 -11   2  11    1.35    2.11 
  11   2 -11    1.63    4.06 
  11  -2 -11    5.03    2.11 
 -11   2  10    6.58    1.58 
  11   2 -10   10.10    6.27 
  11  -2 -10    6.69    3.78 
 -11   2   9    3.03    2.53 
  11  -2  -9   -0.35    1.69 
  11   2  -9    7.39    4.76 
 -11   2   8    0.13    1.68 
  11  -2  -8    1.84    2.87 
 -11  -2   8    2.02    3.78 
  11   2  -8    5.12    3.79 
 -11  -2   7   20.99    8.15 
  11  -2  -7   15.83    4.96 
  11  -2  -7    6.04    3.81 
  11   2  -7   12.69    5.93 
 -11   2   7   16.80    5.56 
  11  -2  -6    7.48    3.63 
 -11  -2   6    8.03    6.29 
  11  -2  -6    7.32    4.46 
 -11   2   6    2.58    1.79 
 -11  -2   5    6.60    5.21 
  11  -2  -5   -2.59    2.58 
 -11   2   5   -1.11    3.60 
  11  -2  -5    0.93    2.04 
 -11  -2   4   60.93   12.46 
  11  -2  -4   49.48   10.69 
 -11   2   4   54.97   11.07 
 -11  -2   3    1.64    3.60 
  11  -2  -3    0.29    1.80 
 -11   2   3    2.84    2.47 
 -11  -2   2    7.27    6.32 
  11  -2  -2    4.17    4.06 
 -11   2   2   14.95    6.96 
 -11  -2   1    8.21    3.92 
  11  -2  -1    2.72    1.94 
  11   2  -1    5.25    4.56 
 -11   2   1    5.20    2.75 
  11  -2   0   55.49   11.21 
  11   2   0   44.38   11.10 
 -11   2   0   50.43   11.22 
  11  -2   1   -2.79    3.65 
  11   2   1   -3.69    3.81 
  11  -2   2    1.63    4.49 
  11   2   2   -1.69    2.33 
  11   2   3   -0.16    2.81 
  11  -2   3   -3.25    4.66 
  11   2   4    3.03    3.78 
  11  -2   4    4.51    2.31 
  11   2   5   22.65    8.16 
  11  -2   5   25.57    8.94 
  11   2   6   -0.29    2.16 
  11  -2   6    2.21    3.38 
  11   2   7    2.51    3.93 
  11  -2   7   -5.22    5.28 
  11   2   8    4.17    5.23 
  11  -2   8    0.46    3.74 
  11   2   9   -5.56    6.62 
  11  -2   9   -3.79    3.44 
  11   2  10   13.87    7.63 
  11  -2  10    6.03    6.51 
  11   2  11   -7.99    6.65 
  11  -2  11    6.14    9.90 
  11   2  12   -1.07    2.87 
  11  -2  12   -0.14    5.91 
  11   2  13    5.43    9.38 
  11  -2  13   18.17   10.54 
  11   2  14    6.98    4.39 
  11  -2  14    6.25    8.41 
  11   2  15  -20.88    9.20 
  11  -2  15   -5.72    9.96 
  11   2  16  -21.63   13.26 
 -11  -3  24    7.91    9.04 
  11   3 -22   21.11   10.51 
  11   3 -21  -15.36    4.85 
  11   3 -20    3.25    6.11 
  11   3 -19   -3.58    6.32 
  11   3 -18   10.73    9.91 
  11   3 -17  -11.49    7.02 
  11  -3 -17   -1.32    2.66 
  11   3 -16   24.58   10.01 
  11  -3 -16   20.38    8.55 
  11   3 -15    9.53    5.70 
  11  -3 -15    5.97    6.95 
 -11   3  14    1.46    2.30 
  11   3 -14    7.76    5.94 
  11  -3 -14   10.69    4.87 
 -11   3  13   -0.60    2.37 
 -11   3  13    1.83    2.13 
  11   3 -13   -4.14    3.47 
  11  -3 -13   -0.05    2.24 
  11  -3 -12    8.07    5.45 
  11   3 -12   -0.34    3.52 
 -11   3  12   -1.75    3.05 
 -11   3  12   -0.95    1.73 
  11  -3 -11   24.43    7.29 
  11   3 -11   21.64    8.57 
 -11   3  11   20.52    5.58 
  11  -3 -10    6.26    3.80 
  11   3 -10    5.90    4.71 
 -11   3  10    8.31    3.95 
  11   3  -9   17.68    7.78 
  11  -3  -9   28.66    7.15 
 -11   3   9   24.44    6.38 
  11  -3  -8    4.65    2.09 
  11   3  -8    1.04    2.49 
 -11   3   8   -3.22    3.03 
  11  -3  -7   -0.19    2.74 
 -11   3   7    4.86    3.97 
  11  -3  -7   10.51    4.01 
  11   3  -7    2.40    2.40 
  11  -3  -6   -0.39    1.31 
  11  -3  -6    1.88    2.51 
 -11   3   6    0.29    3.09 
  11  -3  -5   29.03    5.92 
  11  -3  -5   21.79    6.74 
 -11   3   5   29.67    8.00 
  11  -3  -4    0.76    1.63 
  11  -3  -4    0.58    1.75 
 -11   3   4    3.66    3.73 
  11  -3  -3   19.85    6.27 
 -11   3   3   22.55    7.61 
  11  -3  -2    2.12    4.07 
 -11   3   2    0.96    1.85 
  11  -3  -1   -1.65    3.99 
 -11   3   1   -0.21    3.46 
 -11   3   0   15.70    6.36 
  11   3   0    5.29    5.38 
  11  -3   0   13.19    5.49 
  11   3   1   35.31   10.73 
  11  -3   1   22.95    8.46 
  11   3   2    1.26    2.60 
  11  -3   2    7.44    5.49 
  11   3   3   17.11    7.89 
  11  -3   3   20.73    8.67 
  11   3   4   31.93   10.60 
  11  -3   4   27.52    9.91 
  11   3   5   -1.95    4.74 
  11  -3   5    3.98    5.72 
  11   3   6    4.99    5.55 
  11  -3   6    1.28    5.38 
  11   3   7    0.14    3.87 
  11  -3   7    1.66    5.78 
  11   3   8   14.04    7.60 
  11  -3   8    1.81    4.56 
  11   3   9    3.55    6.46 
  11  -3   9   15.24    8.61 
  11   3  10   -1.79    5.38 
  11  -3  10   -1.58    3.46 
  11   3  11    6.54    5.36 
  11  -3  11    7.21    6.77 
  11   3  12    4.68    7.38 
  11  -3  12    4.31    3.62 
  11   3  13   12.82    8.69 
  11  -3  13    0.18    5.79 
  11   3  14    4.02   10.14 
  11  -3  14   -9.49   12.85 
  11   3  15    5.95    7.00 
  11  -3  15   15.72   10.99 
  11   3  16   18.26   11.84 
  11   4 -21   -4.37    7.27 
  11   4 -20   15.33   10.60 
  11   4 -19   -5.14   10.98 
  11   4 -18    7.28    3.06 
  11   4 -17   -2.90    6.66 
  11   4 -16    5.09    7.63 
  11   4 -15   -1.36    2.89 
  11   4 -14    1.42    3.96 
 -11   4  13    1.56    1.78 
  11  -4 -13   -0.16    1.95 
  11   4 -13   -3.49    3.82 
  11   4 -12   -3.85    2.42 
 -11   4  12    0.62    1.64 
  11  -4 -12    1.90    3.15 
  11   4 -11    0.48    3.26 
 -11   4  11    3.93    1.86 
  11  -4 -11    8.23    4.11 
  11   4 -10   -0.72    2.06 
 -11   4  10   -1.30    2.47 
  11  -4 -10    1.89    2.26 
  11  -4  -9   16.85    4.77 
  11   4  -9   15.41    7.28 
 -11   4   9   11.14    3.49 
  11  -4  -8   -2.32    1.32 
  11  -4  -8    2.71    1.80 
 -11   4   8   -2.56    2.69 
  11   4  -8    0.01    2.28 
  11  -4  -7    0.34    1.11 
  11  -4  -7   -0.40    2.31 
 -11   4   7   -0.65    2.80 
  11   4  -7    3.94    2.31 
  11  -4  -6    2.49    2.25 
  11  -4  -6    4.09    2.36 
 -11   4   6    4.08    3.23 
  11  -4  -5   21.83    6.52 
 -11   4   5   32.40    8.14 
  11  -4  -5   31.96    5.46 
  11  -4  -4    4.26    2.76 
  11  -4  -4   -0.22    2.07 
  11  -4  -3   -4.16    4.35 
  11  -4  -3    1.13    1.71 
 -11   4   3   -3.19    3.13 
  11  -4  -2    6.35    4.83 
 -11   4   2   14.33    5.65 
 -11   4   1   11.53    6.94 
  11  -4  -1    1.41    2.98 
  11  -4   0    2.96    4.69 
  11  -4   1    4.10    3.70 
  11  -4   2    2.67    3.93 
  11   4   3    1.79    2.29 
  11  -4   3    7.33    5.31 
  11   4   4    2.87    4.14 
  11  -4   4    1.90    3.40 
  11   4   5    1.10    4.57 
  11  -4   5   -0.42    4.04 
  11  -4   5   -8.50    6.48 
  11   4   6   11.50    7.31 
  11  -4   6   18.79    8.85 
  11  -4   6    8.82    7.58 
  11   4   7    5.84    5.59 
  11  -4   7    6.49    6.81 
  11   4   8    5.38    4.82 
  11  -4   8   -2.14    2.65 
  11   4   9   -4.72    7.31 
  11  -4   9    8.56    6.99 
  11   4  10    4.43    5.25 
  11  -4  10    8.49    2.96 
  11   4  11   -9.55    7.51 
  11  -4  11   23.61   11.03 
  11   4  12    2.21    4.05 
  11  -4  12    6.82    8.96 
  11   4  13  -11.83    8.95 
  11  -4  13    1.44    9.72 
  11   4  14   -1.55    4.31 
  11  -4  14    0.15    7.05 
  11   4  15  -22.52   11.70 
  11   5 -20   11.93    6.89 
  11   5 -19   -4.69    8.12 
  11   5 -18   -0.19    3.40 
  11   5 -17    6.58    7.29 
  11   5 -16    2.46    5.60 
  11   5 -15   -0.04    3.53 
  11   5 -14   -2.00    3.38 
 -11   5  13   44.40   10.21 
  11   5 -13   25.39   10.40 
  11   5 -12   11.61    6.90 
  11   5 -11   -1.03    3.42 
 -11   5  11    1.76    1.96 
 -11   5  10    8.86    2.17 
  11   5 -10   12.56    7.42 
  11   5  -9   10.64    6.46 
 -11   5   9   10.21    2.75 
  11  -5  -8    1.24    2.27 
 -11   5   8    1.51    2.78 
  11   5  -8    4.78    4.70 
  11  -5  -7    4.49    2.69 
 -11   5   7    8.74    4.39 
  11   5  -7   12.51    6.59 
  11  -5  -6    8.72    4.17 
 -11   5   6    5.76    3.68 
  11   5  -6    3.87    2.48 
  11  -5  -5    3.44    1.51 
 -11   5   5   13.42    5.49 
  11  -5  -5    8.19    1.67 
  11  -5  -4    4.68    3.16 
 -11   5   4    9.13    5.09 
 -11   5   3   34.63    9.04 
  11  -5  -3   21.74    2.75 
  11  -5  -3   19.75    6.97 
 -11   5   2   11.93    6.16 
  11  -5  -2   10.17    5.48 
  11  -5  -2   11.22    2.43 
  11  -5  -1   61.28   12.51 
  11  -5   0    0.45    1.71 
  11  -5   0    0.21    2.73 
  11  -5   1    0.94    2.42 
  11  -5   1    2.07    2.70 
  11  -5   2    1.65    2.65 
  11  -5   2    2.47    3.31 
  11  -5   3    1.63    3.24 
  11  -5   3    6.31    2.00 
  11  -5   4    6.80    5.12 
  11  -5   4   10.63    5.80 
  11  -5   5   24.05   10.82 
  11  -5   5    9.54    3.07 
  11   5   6   -0.27    5.16 
  11  -5   6    3.14    4.40 
  11   5   7   -0.90    3.12 
  11  -5   7   -2.20    3.70 
  11   5   8   -6.46    5.90 
  11  -5   8   -3.16    2.75 
  11   5   9    4.34    4.07 
  11  -5   9   35.11   14.83 
  11   5  10    2.37    3.42 
  11  -5  10    4.75    7.35 
  11   5  11    2.42    6.64 
  11  -5  11    7.52    5.14 
  11   5  12   -1.68    8.84 
  11  -5  12    7.07    6.70 
  11   5  13  -10.74    9.44 
  11  -5  13  -12.08   11.10 
  11   6 -19   -1.50    5.77 
  11   6 -18    9.67    7.20 
  11   6 -17   -4.72    4.28 
  11   6 -16    1.39    7.47 
  11   6 -15   -2.50    5.60 
  11   6 -14    0.96    4.15 
  11   6 -13   15.11    8.79 
  11   6 -12   -3.84    5.40 
  11   6 -11   -1.58    3.63 
  11   6 -10   44.32   13.17 
  11   6  -9    1.77    3.08 
  11  -6  -8    0.34    1.28 
  11   6  -8    2.68    5.17 
  11   6  -7   -1.27    2.46 
  11  -6  -7    3.62    1.85 
  11  -6  -6    4.55    2.92 
  11   6  -6    7.68    5.72 
  11  -6  -5   26.05    7.54 
  11  -6  -4    6.91    4.39 
 -11   6   4   25.45    6.81 
 -11   6   3   23.12    7.41 
  11  -6  -3    7.83    4.93 
  11  -6  -2   20.33    6.99 
  11  -6  -1    3.83    1.99 
  11  -6   0    1.28    2.98 
  11  -6   1   79.46    7.42 
  11  -6   1   57.95   13.25 
  11  -6   2   11.57    7.22 
  11  -6   3   13.51    7.87 
  11  -6   4   48.10   13.56 
  11  -6   5    5.81    3.15 
  11  -6   6    2.50    2.91 
  11  -6   7   43.22   14.88 
  11  -6   8   12.34    8.99 
  11  -6   9   -0.89    6.76 
  11  -6  10   -8.12   11.62 
  11  -6  11    5.10    7.35 
  11  -6  12   -8.99    9.24 
  11   7 -18  -16.46   13.76 
  11   7 -17   -4.26    7.45 
  11   7 -16   -2.92    5.13 
  11   7 -15   -1.12    5.21 
  11   7 -14    5.33    7.30 
  11   7 -13   -4.57    3.04 
  11   7 -12   23.91   10.86 
  11   7 -11   14.39   11.24 
  11   7 -10    2.39    4.36 
  11   7  -9    0.05    2.80 
  11   7  -8    2.61    4.07 
  11  -7  -8    0.34    3.38 
  11  -7  -7    3.84    2.36 
  11   7  -7    2.41    4.19 
  11  -7  -6    4.83    2.93 
  11   7  -6   -1.37    5.15 
  11  -7  -5    6.05    3.61 
  11   7  -5    7.59    5.67 
  11  -7  -4    8.03    5.58 
  11  -7  -3   -1.69    2.62 
  11  -7  -2   10.69    5.77 
  11  -7  -1    9.79    7.68 
  11  -7   0    7.43    5.86 
  11  -7   1   62.72   14.34 
  11  -7   2   -6.11    5.27 
  11  -7   3   -4.08    4.22 
  11  -7   4    0.09    4.19 
  11  -7   5    4.01    6.46 
  11  -7   6   16.41   11.22 
  11  -7   7   -0.81    3.32 
  11  -7   8   -1.47    7.06 
  11  -7   9   -5.13    5.41 
  11  -7  10   -4.83    8.12 
  11   8 -17    6.26    7.67 
  11   8 -16    8.94   11.73 
  11   8 -15   -0.02    7.22 
  11   8 -14    2.27    4.49 
  11   8 -13   17.80   11.79 
  11   8 -12    1.64    5.14 
  11   8 -11   -4.10    5.55 
  11   8 -10   -2.31    6.06 
  11   8  -9   -0.70    3.99 
  11   8  -8    8.82    8.27 
  11  -8  -7    0.60    1.98 
  11   8  -7   -1.81    5.62 
  11  -8  -6    7.34    3.61 
  11   8  -6    3.41    4.07 
  11   8  -5   14.39    8.62 
  11  -8  -5    5.98    4.12 
  11  -8  -4   -3.52    3.73 
  11  -8  -3   -0.44    1.85 
  11  -8  -2    1.45    2.87 
  11  -8  -1    3.28    4.27 
  11  -8   0   -5.28    5.13 
  11  -8   1   11.06    3.22 
  11  -8   2    2.41    5.33 
  11  -8   3   -2.00    4.43 
  11  -8   4    1.48    5.74 
  11  -8   5   -4.38    7.49 
  11  -8   6   -0.72    5.63 
  11  -8   7   -1.24    7.38 
  11  -8   8   20.55   11.45 
  11  -8   9   11.94    5.51 
  11   9 -15   -4.23    5.34 
  11   9 -14    0.02    5.12 
  11   9 -13    2.01    4.59 
  11   9 -12   -2.07    4.54 
  11   9 -11  -14.71   10.29 
  11   9 -10   -7.85    8.20 
  11   9  -9   -0.88    4.30 
  11   9  -8   -8.72    8.57 
  11   9  -7    0.81    7.55 
  11   9  -6   -2.26    4.93 
  11   9  -5   -3.67    5.96 
  11   9  -4    9.64    8.52 
  11  -9  -4   -2.94    6.44 
  11  -9  -3   -0.17    2.42 
  11  -9  -2   12.12    6.61 
  11  -9  -1   -4.81    5.17 
  11  -9   0   -9.75    8.08 
  11  -9   1   -1.29    4.04 
  11  -9   2   -4.96    7.65 
  11  -9   3    1.54    8.13 
  11  -9   4    0.06    5.51 
  11  -9   5   -7.60    6.39 
  11  -9   6    2.82    8.19 
  11  -9   7    5.91   10.99 
  11  10 -13   11.87    5.67 
  11  10 -12   -2.49    4.16 
  11  10 -11   -5.60    5.59 
  11  10 -10   -9.16    6.33 
  11  10  -9    3.31    7.75 
  11  10  -8  -12.72   10.13 
  11  10  -7  -10.12    9.36 
  11  10  -6   12.03    9.33 
  11  10  -5   21.58   11.69 
  11  10  -4  -15.43   10.23 
  11  10  -3   10.38    9.03 
  11 -10  -2    2.61    5.63 
  11 -10  -1   -4.05    7.68 
  11 -10   0    0.12    6.41 
  11 -10   1    1.61    3.83 
  11 -10   2   -9.53    4.13 
  11 -10   3   -8.27    7.69 
  11 -10   4    7.60    3.43 
  11 -10   5    0.45    6.48 
  11 -10   6   10.59    9.47 
  11  11 -10    6.03   12.01 
  11  11  -9   14.48    7.84 
  11  11  -8    8.57    8.29 
  11  11  -7  -11.84    4.72 
  11  11  -6  -15.98   10.68 
  11  11  -5    0.02    7.47 
  11  11  -4    8.58    9.32 
  11  11  -3   20.25   11.27 
  11  11  -2   14.32    7.46 
  11  11  -1   -3.08    6.64 
  11 -11   2   -1.69    5.76 
  12   0 -23  -15.59   11.56 
  12   0 -22   -4.64    8.70 
  12   0 -21    0.32    7.05 
  12   0 -20   -1.93    4.79 
  12   0 -19    7.57    4.36 
  12   0 -18   18.51    9.68 
  12   0 -17    3.33    4.66 
  12   0 -16   12.96    7.03 
  12   0 -15    3.63    4.38 
  12   0 -14    4.22    5.46 
 -12   0  13  -10.22    5.44 
  12   0 -13    1.66    3.69 
 -12   0  12   10.57    5.21 
  12   0 -12    7.45    4.96 
  12   0 -11    2.41    2.36 
 -12   0  11   -8.50    4.62 
  12   0 -10   42.23   10.40 
 -12   0  10   49.68   11.31 
 -12   0   9    1.98    3.23 
  12   0  -9   -3.04    3.27 
  12   0  -8    7.43    3.40 
 -12   0   8    5.70    2.15 
 -12   0   7   -1.52    2.45 
  12   0  -7   -2.66    3.09 
 -12   0   6   -1.51    4.16 
  12   0  -6   -2.64    3.02 
 -12   0   5   -1.38    5.17 
  12   0  -5   -3.41    4.61 
 -12   0   4  244.91   24.31 
  12   0  -4  210.06   22.73 
  12   0  -3    5.52    4.58 
 -12   0   3    2.01    2.21 
  12   0  -2    9.47    4.33 
 -12   0   2   -3.97    5.39 
  12   0  -1    2.76    3.72 
  12   0   0   -1.28    3.13 
  12   0   1    3.75    4.13 
  12   0   2   11.09    6.50 
  12   0   3    2.67    3.50 
  12   0   4    0.20    2.85 
  12   0   5    3.28    4.17 
  12   0   6    6.60    5.06 
  12   0   7   -1.29    4.52 
  12   0   8   -2.13    2.76 
  12   0   9   17.22    9.71 
  12   0  10    1.27    3.15 
  12   0  11    2.02    4.34 
  12   0  12  -13.09    9.08 
  12   0  13   15.51   10.02 
  12   0  14    0.81    7.55 
  12   0  15    4.02    8.63 
  12   1 -23   -7.30    8.46 
  12  -1 -22   -4.03    7.07 
  12   1 -22   -5.09    3.21 
  12  -1 -21    7.00    7.47 
  12   1 -21   -4.81    7.92 
  12  -1 -20   -6.61    4.35 
  12   1 -20   -4.00    5.46 
  12   1 -19    6.70    7.72 
  12  -1 -19    3.47    3.04 
  12   1 -18    8.88    6.98 
  12  -1 -18   -1.03    3.30 
  12  -1 -17   -3.96    4.23 
  12   1 -17   -1.06    4.95 
  12  -1 -16    6.26    3.55 
  12   1 -16    6.59    4.59 
  12  -1 -15   -6.05    4.28 
 -12   1  15    2.84    2.98 
  12   1 -15   -7.87    5.90 
  12  -1 -14    0.85    2.61 
 -12   1  14   -0.10    4.80 
  12   1 -14   -0.51    2.63 
 -12   1  13   12.24    5.74 
  12  -1 -13   18.23    6.81 
  12   1 -13   13.40    7.30 
 -12   1  12   -0.82    2.01 
  12  -1 -12   -1.20    3.19 
  12   1 -12   -5.42    5.96 
  12   1 -11    2.07    2.94 
 -12   1  11    0.62    1.64 
  12  -1 -11    5.91    3.55 
  12  -1 -10   -0.10    2.46 
 -12   1  10    1.55    3.10 
 -12  -1  10    0.78    3.81 
  12   1 -10    0.15    2.23 
 -12   1   9    1.06    2.52 
  12  -1  -9    3.38    3.69 
 -12  -1   9    0.95    3.54 
  12   1  -9   -2.95    4.10 
 -12   1   8   61.66   11.01 
 -12  -1   8   39.84   10.56 
  12   1  -8   47.75   10.96 
  12  -1  -8   40.43    9.32 
 -12   1   7   -2.32    3.24 
 -12  -1   7    0.32    2.58 
  12  -1  -7    0.12    2.28 
  12   1  -7    4.89    3.69 
 -12   1   6    4.61    3.95 
  12  -1  -6    3.70    2.78 
 -12  -1   6    0.48    4.15 
  12  -1  -6   -5.41    4.00 
 -12  -1   5   23.51    9.56 
  12  -1  -5    9.88    4.65 
 -12   1   5   16.60    5.49 
 -12  -1   4   -1.40    2.77 
  12  -1  -4    0.11    2.09 
  12   1  -4    3.34    3.40 
 -12   1   4    1.06    3.47 
 -12  -1   3    9.26    5.38 
  12  -1  -3   11.76    6.08 
  12   1  -3    8.34    4.81 
 -12   1   3   10.00    3.25 
  12  -1  -2    0.85    3.36 
  12   1  -2    2.98    2.88 
 -12   1   2    4.77    4.46 
  12  -1  -1    3.07    3.43 
  12   1  -1    6.05    4.64 
  12  -1   0    0.66    2.35 
  12   1   0    0.88    3.25 
  12  -1   1   -3.98    3.15 
  12   1   1    1.65    2.86 
  12  -1   2    5.58    4.60 
  12   1   2    2.21    2.13 
  12  -1   3   10.69    5.74 
  12   1   3    7.85    5.31 
  12  -1   4   12.87    6.85 
  12   1   4    2.14    2.61 
  12  -1   5   -0.28    3.90 
  12   1   5   -2.78    5.94 
  12  -1   6    4.01    5.16 
  12   1   6    1.36    4.80 
  12  -1   7   -3.16    4.30 
  12   1   7   -7.75    5.99 
  12  -1   8   -1.88    9.42 
  12   1   8   -0.40    3.15 
  12  -1   9   25.88   10.69 
  12   1   9   26.88   10.50 
  12  -1  10   11.02    7.74 
  12   1  10    6.81    7.83 
  12  -1  11   11.75    7.46 
  12   1  11   13.21    7.34 
  12  -1  12    5.53    7.46 
  12   1  12    1.31    2.90 
  12  -1  13    7.94    4.14 
  12   1  13    2.87    7.71 
  12  -1  14    3.00    3.62 
  12   1  14    7.04    8.20 
  12  -1  15  -10.68    7.29 
  12   1  15    1.29    7.01 
  12   1  16    2.55    9.12 
  12   2 -22    7.00    9.54 
  12   2 -21   -5.48    6.47 
  12   2 -20   -8.26    3.21 
  12  -2 -20   -6.55    5.80 
  12   2 -19   -0.74    4.81 
  12  -2 -19    0.30    3.95 
  12   2 -18    4.03    5.25 
  12  -2 -18   -6.59    5.60 
  12   2 -17   18.01   11.24 
  12  -2 -17    2.85    4.70 
  12   2 -16    4.62    5.75 
  12  -2 -16   -3.97    6.53 
  12  -2 -15    2.65    4.60 
 -12   2  15    0.02    1.84 
  12  -2 -14   14.22    6.37 
 -12   2  14   17.00    4.75 
  12   2 -14    4.56    4.84 
 -12   2  13   -2.77    1.71 
  12  -2 -13    1.67    2.54 
  12   2 -12   39.38   11.74 
 -12   2  12   48.19    9.27 
  12  -2 -12   52.65   11.41 
 -12   2  11   -7.04    3.71 
  12   2 -11   -0.46    2.57 
  12  -2 -11   -2.87    3.94 
 -12   2  10    7.07    2.51 
  12   2 -10    9.19    5.78 
  12  -2 -10    6.73    3.91 
 -12   2   9   -1.43    2.26 
  12   2  -9    2.64    2.85 
  12  -2  -9    0.93    2.87 
  12  -2  -8   10.88    4.47 
  12   2  -8    9.20    5.66 
 -12   2   8   14.13    5.82 
  12   2  -7    5.52    4.07 
  12  -2  -7    7.74    4.81 
  12  -2  -7   13.91    5.26 
 -12   2   7   10.11    5.22 
  12  -2  -6    2.27    4.00 
  12  -2  -6    9.86    4.16 
 -12   2   6   15.97    6.36 
  12  -2  -5    9.24    5.41 
  12  -2  -5    5.78    2.33 
 -12   2   5   18.26    7.23 
  12  -2  -4    5.29    2.08 
 -12   2   4    3.38    2.79 
  12  -2  -3    2.47    4.11 
 -12   2   3    7.95    6.43 
  12  -2  -2   32.13    9.02 
  12   2  -2   47.35   11.98 
 -12   2   2   51.92   11.85 
  12  -2  -1    4.67    2.09 
  12   2  -1    6.43    4.21 
  12  -2   0    5.94    4.38 
  12   2   0   12.32    7.48 
  12  -2   1    2.74    3.05 
  12   2   1    2.66    2.42 
  12  -2   2    2.42    3.42 
  12   2   2    2.06    4.84 
  12  -2   3    8.92    6.32 
  12   2   3    4.13    6.63 
  12   2   4    9.87    6.13 
  12  -2   4    1.61    2.15 
  12   2   5   -2.89    3.66 
  12  -2   5    8.86    5.84 
  12   2   6    5.26    5.58 
  12  -2   6   -7.81    8.24 
  12   2   7   -4.32    4.44 
  12  -2   7    5.67    4.98 
  12   2   8   -4.77    6.10 
  12  -2   8   -3.78    7.37 
  12   2   9   -3.24    4.79 
  12  -2   9   15.98    9.16 
  12   2  10    2.09    2.73 
  12  -2  10   -4.80    4.96 
  12   2  11    2.72    6.94 
  12  -2  11    6.92    6.12 
  12   2  12  -14.29   10.10 
  12  -2  12    0.26    7.05 
  12   2  13   -5.04    7.33 
  12  -2  13    4.64    4.68 
  12   2  14   -3.70    6.72 
  12  -2  14    3.55    5.30 
  12   2  15    0.11    8.99 
  12   2  16    1.06   10.21 
  12   3 -22   -9.88    7.96 
  12   3 -21   -5.71    4.78 
  12   3 -20   -1.45    3.62 
  12   3 -19  -10.95   10.30 
  12   3 -18    4.65    4.18 
  12  -3 -18   -0.10    2.81 
  12   3 -17   -0.60    3.98 
  12  -3 -17    7.03    4.87 
  12   3 -16    2.26    5.50 
  12  -3 -16   -3.61    4.75 
  12   3 -15    1.92    5.84 
  12  -3 -15   -2.80    4.83 
 -12   3  14    3.95    4.47 
  12   3 -14   -2.11    4.19 
  12  -3 -14   -3.83    4.28 
  12  -3 -13   -5.24    3.95 
  12   3 -13   -5.33    5.81 
 -12   3  13   -1.38    2.46 
  12  -3 -12    0.07    2.10 
  12   3 -12    1.83    2.60 
 -12   3  12    2.73    2.32 
  12  -3 -11   27.63    7.96 
  12   3 -11   22.08    8.29 
 -12   3  11   25.27    6.15 
  12  -3 -10   15.54    5.21 
  12   3 -10   12.18    6.64 
 -12   3  10    5.50    2.93 
  12   3  -9    4.54    2.84 
  12  -3  -9    2.50    2.40 
 -12   3   9    3.99    1.83 
  12   3  -8   -1.01    2.52 
  12  -3  -8   -0.22    1.52 
 -12   3   8    0.87    1.93 
  12  -3  -8    0.32    1.31 
  12  -3  -7   13.29    4.77 
  12  -3  -7    4.41    3.22 
  12   3  -7   11.04    7.29 
 -12   3   7    6.58    4.12 
  12  -3  -6   -4.44    4.38 
  12  -3  -6    2.81    2.37 
 -12   3   6    0.61    4.25 
  12  -3  -5   41.70    9.62 
 -12   3   5   65.89   12.70 
  12  -3  -5   53.57    8.41 
  12  -3  -4    4.26    3.67 
 -12   3   4    0.66    4.17 
  12  -3  -3   12.74    5.55 
 -12   3   3   11.07    6.67 
  12  -3  -2    4.68    3.77 
 -12   3   2   -0.03    2.10 
  12  -3  -1    3.26    4.47 
  12  -3   0   10.46    5.54 
  12   3   0   10.36    6.59 
  12  -3   1    9.55    5.93 
  12   3   1    4.68    4.25 
  12   3   2    7.05    5.45 
  12  -3   2    6.98    5.95 
  12   3   3   53.24   13.63 
  12  -3   3   37.48   10.99 
  12   3   4    2.52    3.08 
  12  -3   4    1.42    2.99 
  12   3   5   -8.71    6.83 
  12  -3   5   -2.37    5.72 
  12   3   6   -1.72    3.55 
  12  -3   6    4.28    4.84 
  12   3   7   -1.75    6.18 
  12  -3   7   -0.61    4.75 
  12   3   8   -3.74    3.16 
  12  -3   8   -1.03    3.64 
  12   3   9    6.61    7.31 
  12  -3   9   40.37   13.62 
  12   3  10    8.24    7.21 
  12  -3  10   14.17    7.37 
  12   3  11   -4.64    4.77 
  12  -3  11   -5.43    8.62 
  12   3  12    0.08    6.27 
  12  -3  12    8.62    6.41 
  12   3  13   -9.75    7.69 
  12  -3  13    7.52    6.26 
  12   3  14    6.20    8.68 
  12  -3  14   -1.95    3.32 
  12   3  15   -1.78    5.98 
  12   4 -21  -16.43   12.98 
  12   4 -20   -2.05    3.81 
  12   4 -19    6.78    3.73 
  12   4 -18   12.39    9.67 
  12   4 -17    0.60    6.83 
  12   4 -16    3.55    7.43 
  12   4 -15   -0.02    4.43 
  12  -4 -15    3.43    2.83 
  12  -4 -14   12.52    5.40 
  12   4 -14   14.78    7.40 
 -12   4  13    3.21    1.92 
  12  -4 -13    3.39    4.03 
  12   4 -12    0.85    2.49 
 -12   4  12   -3.45    2.49 
  12  -4 -12   -3.12    4.03 
  12   4 -11   -0.11    2.66 
 -12   4  11    7.34    4.15 
  12  -4 -11    2.65    3.93 
  12  -4 -10    0.25    1.66 
 -12   4  10    7.12    2.32 
  12   4 -10   -0.82    3.64 
  12  -4  -9    2.09    2.07 
  12   4  -9    5.66    4.16 
 -12   4   9    3.50    4.00 
  12   4  -8    7.91    4.86 
  12  -4  -8   11.79    4.25 
  12  -4  -8    8.70    4.39 
 -12   4   8   13.22    5.68 
  12  -4  -7   -0.41    2.86 
  12  -4  -7    0.20    1.25 
 -12   4   7    2.28    1.60 
  12  -4  -6   32.97    8.76 
 -12   4   6   39.04    9.42 
  12  -4  -6   40.75    7.06 
  12  -4  -5    0.67    2.68 
  12  -4  -5   -0.82    2.09 
 -12   4   5   -4.44    4.25 
  12  -4  -4    4.10    4.35 
  12  -4  -4   -2.80    2.20 
 -12   4   4    3.23    3.96 
  12  -4  -3    0.24    2.95 
 -12   4   3    0.31    4.30 
  12  -4  -2   -1.60    3.05 
  12  -4  -1   -2.25    2.49 
  12  -4   0    4.01    2.83 
  12  -4   1   -1.63    2.34 
  12   4   2    1.03    3.13 
  12  -4   2    4.61    4.63 
  12   4   3   -2.52    4.69 
  12  -4   3    2.69    3.76 
  12   4   4   36.71   11.74 
  12  -4   4   29.76   10.96 
  12   4   5   -0.34    4.47 
  12  -4   5   -4.54    5.21 
  12   4   6   -7.89    4.41 
  12  -4   6   -8.28    6.13 
  12   4   7   -5.05    2.81 
  12  -4   7   -3.65    2.90 
  12   4   8   -7.22    5.65 
  12  -4   8    4.46    5.48 
  12   4   9   -3.47    4.72 
  12  -4   9    1.19    5.14 
  12   4  10   -8.40    6.69 
  12  -4  10   15.12    9.32 
  12   4  11    3.94    5.67 
  12  -4  11   -9.36   10.43 
  12   4  12  -14.10   10.33 
  12  -4  12    8.63   10.62 
  12   4  13   -8.38    6.70 
  12  -4  13   -2.20    8.62 
  12   4  14  -17.49   13.60 
  12   5 -20   -9.11    5.15 
  12   5 -19  -10.06    6.17 
  12   5 -18    7.11    7.18 
  12   5 -17   13.80    9.23 
  12   5 -16   -4.76    4.89 
  12   5 -15   -2.37    3.60 
  12   5 -14   -3.50    4.06 
  12   5 -13    1.69    4.90 
  12   5 -12   -8.59    5.82 
 -12   5  11   14.13    3.77 
  12   5 -11   14.36    9.06 
 -12   5  10    2.21    2.70 
  12   5 -10    5.00    6.38 
  12   5  -9   10.93    6.02 
 -12   5   9   -1.41    3.76 
  12  -5  -9   12.46    4.41 
  12  -5  -8    2.94    3.06 
 -12   5   8    2.14    3.98 
  12  -5  -8    3.23    1.81 
  12   5  -8    2.66    3.77 
  12   5  -7    1.92    4.08 
  12  -5  -7    2.65    2.12 
 -12   5   7   -0.61    3.16 
  12  -5  -7    0.88    1.06 
  12  -5  -6   -3.63    3.80 
 -12   5   6    2.00    2.81 
  12  -5  -6    2.30    0.88 
  12  -5  -5   22.52    6.60 
  12  -5  -5   28.27    3.76 
 -12   5   5   33.60    8.90 
  12  -5  -4    6.76    4.45 
 -12   5   4   16.98    7.49 
  12  -5  -4    8.63    1.77 
  12  -5  -3   11.60    4.82 
  12  -5  -3   22.10    3.79 
 -12   5   3   16.35    6.80 
  12  -5  -2    0.54    0.91 
  12  -5  -2    6.01    3.22 
  12  -5  -1    9.82    6.16 
  12  -5   0    5.07    6.41 
  12  -5   1    2.32    2.18 
  12  -5   1    7.38    5.93 
  12  -5   2   -3.86    3.30 
  12  -5   2   -5.71    5.69 
  12  -5   3    2.24    3.41 
  12  -5   3    3.97    3.29 
  12  -5   4    3.07    3.30 
  12  -5   5   -0.12    6.85 
  12   5   6   -9.90    7.83 
  12  -5   6   -7.37    5.32 
  12   5   7   16.33    9.65 
  12  -5   7    8.05    5.39 
  12   5   8   -4.44    4.81 
  12  -5   8    4.52    5.55 
  12   5   9    1.99    6.22 
  12  -5   9   12.76    9.82 
  12   5  10   -3.94    7.88 
  12  -5  10   20.88   10.85 
  12   5  11   -5.33    7.47 
  12  -5  11   -4.47    9.83 
  12   5  12   -8.47    8.52 
  12  -5  12    1.87    4.22 
  12   5  13   -1.94    9.75 
  12   6 -19    4.65    7.62 
  12   6 -18   -4.12    3.64 
  12   6 -17   12.52   10.34 
  12   6 -16    7.29    6.93 
  12   6 -15    2.07   10.11 
  12   6 -14   -2.15    4.49 
  12   6 -13   11.37    8.11 
  12   6 -12   11.50    7.14 
  12   6 -11   -3.51    5.45 
  12   6 -10   26.10   11.32 
  12   6  -9   19.15    9.80 
  12  -6  -8    7.79    3.21 
  12   6  -8    3.55    4.53 
  12  -6  -7    4.92    3.12 
 -12   6   7    3.24    2.09 
  12   6  -7    7.27    4.91 
  12   6  -6   -1.62    3.77 
  12  -6  -6   -2.21    2.51 
 -12   6   6    2.58    2.33 
  12  -6  -5    1.37    2.21 
 -12   6   5   -9.08    5.69 
  12  -6  -4    5.22    4.47 
 -12   6   4    3.42    4.67 
  12  -6  -3   28.43    8.92 
  12  -6  -2    8.76    5.98 
  12  -6  -1   10.40    6.51 
  12  -6   0    2.74    3.18 
  12  -6   1   24.65    8.00 
  12  -6   2   14.62    7.37 
  12  -6   3    1.21    3.41 
  12  -6   4    1.95    4.81 
  12  -6   5   20.82    8.49 
  12  -6   6   18.09   10.31 
  12  -6   7   -5.57    4.25 
  12  -6   8   -7.26    5.80 
  12  -6   9   18.65   12.36 
  12  -6  10    3.81    8.42 
  12  -6  11   -1.88    8.66 
  12   7 -18    5.10    7.77 
  12   7 -17   20.34   11.66 
  12   7 -16    6.49    6.03 
  12   7 -15    5.37    6.90 
  12   7 -14    7.03    8.07 
  12   7 -13    4.39    8.37 
  12   7 -12  -10.99    9.05 
  12   7 -11    1.97    5.67 
  12   7 -10    1.17    5.31 
  12   7  -9    2.85    3.09 
  12  -7  -9    1.20    2.58 
  12  -7  -8    8.69    4.66 
  12   7  -8    3.39    4.69 
  12   7  -7    0.35    4.06 
  12  -7  -7   -5.16    4.53 
  12  -7  -6    1.73    3.78 
  12   7  -6    4.47    5.85 
  12  -7  -5   -0.23    2.08 
  12  -7  -4    4.41    3.09 
  12  -7  -3    2.26    2.39 
  12  -7  -2    2.11    2.19 
  12  -7  -1   -1.77    2.37 
  12  -7   0   -4.50    3.60 
  12  -7   1    2.89    4.32 
  12  -7   2   -0.15    6.55 
  12  -7   3   12.67    7.58 
  12  -7   4    5.05    6.74 
  12  -7   5   -1.01    6.44 
  12  -7   6   -3.60    6.01 
  12  -7   7   14.40    9.57 
  12  -7   8   17.22   10.21 
  12  -7   9    5.22    7.21 
  12   8 -16    3.51    8.59 
  12   8 -15    4.23    6.68 
  12   8 -14   -8.98    6.76 
  12   8 -13   13.28   11.21 
  12   8 -12  -10.11    6.12 
  12   8 -11    2.60    5.59 
  12   8 -10    4.84    4.80 
  12   8  -9   13.63    7.59 
  12   8  -8   13.63    8.38 
  12   8  -7    2.26    7.28 
  12  -8  -6    0.97    3.40 
  12   8  -6  -13.60    8.03 
  12  -8  -5    5.42    2.84 
  12   8  -5    6.24    5.43 
  12  -8  -4   -1.47    3.09 
  12  -8  -3    9.80    5.48 
  12  -8  -2   -2.09    3.59 
  12  -8  -1    8.46    5.87 
  12  -8   0    3.96    5.12 
  12  -8   1   13.71    9.40 
  12  -8   2   -4.03    7.14 
  12  -8   3   -1.23    4.19 
  12  -8   4   -0.82    5.05 
  12  -8   5   -8.72    9.63 
  12  -8   6  -14.64   10.54 
  12  -8   7   16.91    7.96 
  12  -8   8  -20.38   10.37 
  12   9 -14   21.61   12.21 
  12   9 -13   23.21   12.75 
  12   9 -12   -0.54    3.92 
  12   9 -11   10.34    8.36 
  12   9 -10   -5.36    5.89 
  12   9  -9   -4.66    5.14 
  12   9  -8   -3.72    6.59 
  12   9  -7   -3.44    5.42 
  12   9  -6   20.40   11.72 
  12   9  -5   -8.54    7.34 
  12   9  -4   11.15    6.45 
  12  -9  -4    4.33    3.70 
  12  -9  -3   -9.41    6.60 
  12  -9  -2  -11.05    8.20 
  12  -9  -1    3.70    3.41 
  12  -9   0   -0.14    2.92 
  12  -9   1    3.08    6.37 
  12  -9   2   -6.65    8.56 
  12  -9   3   -3.94    7.01 
  12  -9   4   -3.19    5.64 
  12  -9   5    3.09    7.16 
  12  -9   6    7.95    8.06 
  12  10 -12   14.88   11.05 
  12  10 -11  -27.55   14.21 
  12  10 -10   -5.69    3.98 
  12  10  -9    6.27    6.17 
  12  10  -8    4.09    5.05 
  12  10  -7   13.49    9.01 
  12  10  -6  -10.57   10.37 
  12  10  -5   -5.47    3.16 
  12  10  -4    5.11    4.42 
  12  10  -3  -10.28    7.52 
  12 -10  -1  -11.39    9.02 
  12 -10   0    5.85    6.10 
  12 -10   1    5.31    4.36 
  12 -10   2   17.04    7.48 
  12 -10   3   -8.69    8.87 
  12 -10   4    2.45    9.73 
  12 -10   5   -4.16   11.30 
  12  11  -9   -6.36    4.14 
  12  11  -8    3.11    3.89 
  12  11  -7  -20.77   16.08 
  12  11  -6   -3.82    8.54 
  12  11  -5  -15.92   11.21 
  12  11  -4    2.84    7.52 
  12  11  -3   -2.84    7.51 
  12  11  -2  -17.34   12.43 
  12  11  -1  -13.85   10.80 
  13   0 -23    1.01    8.35 
  13   0 -22   -4.45    8.30 
  13   0 -21   -2.85    6.95 
  13   0 -20    5.79    4.11 
  13   0 -19   11.17    6.26 
  13   0 -18   14.61    8.20 
  13   0 -17   -1.98    3.88 
  13   0 -16    5.80    7.88 
  13   0 -15    0.99    3.01 
  13   0 -14    0.60    4.45 
  13   0 -13    4.09    3.25 
  13   0 -12    7.15    4.81 
  13   0 -11   -6.05    4.49 
 -13   0  11    1.07    4.68 
 -13   0  10   45.67   11.24 
  13   0 -10   42.24   11.24 
 -13   0   9    2.54    4.59 
  13   0  -9   -6.22    4.80 
 -13   0   8    5.48    2.62 
  13   0  -8    5.74    4.90 
 -13   0   7   -3.72    5.66 
  13   0  -7   -1.16    2.46 
 -13   0   6   37.10   10.10 
 -13   0   5    3.62    3.92 
  13   0  -5    0.42    2.94 
  13   0  -4   80.78   14.99 
  13   0  -3   -2.01    2.98 
  13   0  -2   -1.82    2.69 
  13   0  -1   -1.58    3.37 
  13   0   0    6.80    6.02 
  13   0   1   -5.79    4.73 
  13   0   2   11.91    6.60 
  13   0   3   -3.45    3.96 
  13   0   4    6.32    6.58 
  13   0   5    1.38    2.34 
  13   0   6    6.53    8.25 
  13   0   7   -4.19    7.27 
  13   0   8    0.95    4.13 
  13   0   9   -2.99    4.63 
  13   0  10   18.90   10.36 
  13   0  11    8.61    5.60 
  13   0  12    4.98    5.92 
  13   0  13    7.48    5.82 
  13   0  14  -16.60   12.95 
  13  -1 -22    8.56    9.43 
  13   1 -22    5.79    8.15 
  13  -1 -21    5.46    3.88 
  13   1 -21   10.98    7.08 
  13   1 -20   -0.90    7.23 
  13  -1 -20    6.58    6.90 
  13   1 -19    7.08    6.80 
  13  -1 -19   12.51    8.91 
  13  -1 -18   -2.18    5.44 
  13   1 -18   -3.83    6.10 
  13  -1 -17   16.17    7.65 
  13   1 -17   22.12   11.54 
  13  -1 -16    7.25    6.78 
  13   1 -16    6.78    6.60 
  13  -1 -15   -0.09    2.25 
 -13   1  15    2.87    3.86 
  13   1 -15    0.05    3.04 
 -13   1  14   -2.21    2.56 
  13  -1 -14    5.54    4.56 
  13   1 -14    0.11    4.46 
 -13   1  13    4.65    4.34 
  13  -1 -13   -1.13    2.89 
  13   1 -13    4.13    6.07 
  13   1 -12    7.77    5.80 
 -13   1  12    1.13    3.04 
  13  -1 -12   -2.05    4.17 
 -13   1  11    2.15    3.27 
  13   1 -11    6.93    5.27 
  13  -1 -11    8.24    4.46 
 -13   1  10   11.73    5.75 
  13  -1 -10   12.25    5.20 
  13   1 -10   14.81    6.39 
 -13   1   9    6.71    2.33 
  13   1  -9    7.01    4.68 
  13  -1  -9    1.85    1.92 
  13  -1  -8    1.77    2.82 
 -13   1   8    8.02    5.17 
  13   1  -8    1.94    2.69 
 -13   1   7   15.71    7.29 
  13   1  -7   13.90    7.40 
  13  -1  -7    7.92    4.13 
 -13   1   6   -3.65    3.74 
  13  -1  -6   -4.42    2.73 
  13  -1  -6   -1.90    2.79 
  13  -1  -5   10.90    5.69 
 -13   1   5    8.14    6.75 
  13  -1  -4   13.44    7.77 
  13   1  -4   16.23    7.72 
 -13   1   4   10.82    5.12 
  13  -1  -3   22.73    8.71 
  13   1  -3   26.46    9.58 
  13  -1  -2    0.48    4.75 
  13   1  -2    3.13    2.94 
  13  -1  -1    0.38    3.57 
  13   1  -1    0.62    2.49 
  13  -1   0   11.96    7.54 
  13   1   0   -1.83    2.52 
  13  -1   1    4.93    5.45 
  13   1   1    3.20    5.30 
  13  -1   2   -1.32    2.90 
  13   1   2    1.73    2.60 
  13  -1   3    0.86    2.99 
  13   1   3    2.70    5.28 
  13  -1   4   -6.57    6.42 
  13   1   4   -0.49    4.72 
  13  -1   5   -2.61    6.28 
  13   1   5    9.83    6.25 
  13  -1   6   -3.31    5.95 
  13   1   6    5.70    4.95 
  13  -1   7    5.83    4.76 
  13   1   7    2.05    3.11 
  13  -1   8   -0.07    5.74 
  13   1   8   -0.31    3.69 
  13  -1   9    5.06    5.96 
  13   1   9   14.20    9.42 
  13  -1  10    7.72    7.88 
  13   1  10   -3.98    5.63 
  13  -1  11    2.71    6.41 
  13   1  11   13.64    9.46 
  13  -1  12   -5.36    5.07 
  13   1  12  -11.83    8.80 
  13  -1  13   -6.03    9.21 
  13   1  13    2.17    6.19 
  13  -1  14   14.71    6.19 
  13   1  14    4.43    4.40 
  13   1  15  -11.60   10.79 
  13   2 -22   20.10   11.46 
  13   2 -21   -4.44    3.65 
  13  -2 -21   -7.20    5.75 
  13   2 -20   -9.84    9.29 
  13  -2 -20   -3.16    2.73 
  13   2 -19   11.95   10.83 
  13  -2 -19   10.05    7.00 
  13   2 -18    1.69    3.59 
  13  -2 -18    0.38    3.28 
  13   2 -17   -6.77    5.75 
  13  -2 -17    1.99    3.60 
  13  -2 -16   -4.65    5.39 
  13   2 -16    4.06    3.94 
  13  -2 -15    5.78    5.02 
 -13   2  15   -5.87    4.64 
  13   2 -15    8.60    8.48 
 -13   2  14   -2.61    4.30 
  13  -2 -14    2.69    2.97 
  13   2 -14   -1.32    4.14 
 -13   2  13   -7.10    5.85 
  13  -2 -13   -1.43    3.05 
  13   2 -13    2.61    4.37 
 -13   2  12    4.47    3.13 
  13   2 -12    4.88    2.53 
  13  -2 -12   -1.80    3.05 
 -13   2  11   38.86    9.04 
  13   2 -11   26.77    9.69 
  13  -2 -11   34.86    9.24 
 -13   2  10   -4.20    4.38 
  13   2 -10   -4.37    4.93 
  13  -2 -10   -0.30    3.18 
 -13   2   9    2.89    2.89 
  13  -2  -9    2.99    3.16 
  13   2  -9    3.54    6.31 
  13   2  -8    4.22    4.02 
  13  -2  -8    2.72    3.12 
 -13   2   8    6.12    3.97 
  13  -2  -7    3.50    2.34 
  13  -2  -7    2.94    2.62 
  13   2  -7   -3.61    2.97 
 -13   2   7    6.40    5.40 
  13  -2  -6    1.35    3.27 
  13  -2  -6    4.12    4.31 
 -13   2   6    4.60    4.18 
  13  -2  -5   16.27    7.28 
 -13   2   5    9.78    2.60 
  13  -2  -4   13.51    5.33 
 -13   2   4    5.90    2.31 
  13  -2  -3   14.98    7.06 
  13  -2  -2    7.93    4.44 
  13   2  -2   15.55    8.10 
  13  -2  -1    3.82    4.64 
  13   2  -1    3.14    4.66 
  13  -2   0    6.90    5.27 
  13   2   0   -0.80    3.10 
  13  -2   1    1.61    4.58 
  13   2   1   10.68    7.88 
  13  -2   2   35.19   10.61 
  13   2   2   32.79   10.82 
  13  -2   3   13.38    6.24 
  13   2   3   29.93   10.84 
  13  -2   4    1.68    4.09 
  13   2   4    5.78    2.49 
  13  -2   5    1.24    3.73 
  13   2   5   -5.80    6.67 
  13  -2   6    3.07    3.39 
  13   2   6   14.08    7.26 
  13   2   7   13.46    7.26 
  13  -2   7   11.67    8.98 
  13   2   8   -0.45    4.64 
  13  -2   8    0.35    2.98 
  13   2   9   -4.55    6.48 
  13  -2   9    0.55    6.13 
  13   2  10  -13.74   10.67 
  13  -2  10   -9.46    7.05 
  13   2  11   -8.94    8.07 
  13  -2  11    3.98    6.84 
  13   2  12   15.32    9.55 
  13  -2  12   -6.31    8.45 
  13   2  13    6.37    6.87 
  13  -2  13   26.70   12.44 
  13   2  14  -11.99    9.07 
  13   2  15   -3.86    7.35 
  13   3 -21    3.07    6.05 
  13   3 -20  -10.75    8.16 
  13   3 -19   -0.37    4.43 
  13  -3 -19   -2.08    3.54 
  13   3 -18   -9.41    8.73 
  13  -3 -18    2.51    5.51 
  13   3 -17    0.41    7.12 
  13  -3 -17   -3.74    5.03 
  13   3 -16    8.10    7.60 
  13  -3 -16   -5.11    4.55 
  13   3 -15    8.51    7.28 
  13  -3 -15   17.04    5.68 
  13  -3 -14   17.05    7.56 
  13   3 -14   -1.40    6.31 
  13   3 -13    9.22    5.52 
  13  -3 -13   -2.06    3.85 
 -13   3  13   -6.02    4.91 
  13  -3 -12    0.64    3.21 
  13   3 -12    6.39    6.08 
 -13   3  12   -3.54    4.64 
  13  -3 -11    2.42    3.73 
  13   3 -11   -0.74    3.43 
 -13   3  11   -3.75    4.39 
  13  -3 -10    3.31    4.26 
 -13   3  10    3.65    2.07 
  13   3 -10   -1.58    2.80 
  13   3  -9    5.58    4.50 
  13  -3  -9   14.65    5.74 
 -13   3   9   11.06    4.56 
  13  -3  -8   11.86    4.54 
  13   3  -8   13.82    7.11 
  13  -3  -8    9.13    5.00 
 -13   3   8    7.24    2.18 
  13   3  -7   25.82    9.01 
  13  -3  -7   27.80    6.38 
  13  -3  -7   19.95    7.24 
 -13   3   7   32.71    9.01 
  13  -3  -6    0.68    1.45 
  13  -3  -6    1.90    3.24 
 -13   3   6   -5.21    5.04 
  13  -3  -5   25.46    6.82 
  13  -3  -5   26.93    8.28 
 -13   3   5   34.95   10.27 
  13  -3  -4    3.40    2.21 
 -13   3   4   -1.95    2.43 
  13  -3  -3   -2.29    3.71 
  13  -3  -2   14.18    7.82 
  13  -3  -1   26.43    8.81 
  13  -3   0    0.01    2.66 
  13   3   0   -0.17    3.43 
  13  -3   1   13.36    6.13 
  13   3   1   25.46    9.76 
  13  -3   2   24.47    9.70 
  13   3   2   21.46   10.39 
  13   3   3    1.71    5.19 
  13  -3   3   -0.06    3.94 
  13   3   4   -0.02    3.07 
  13  -3   4    1.84    3.07 
  13   3   5   17.89   10.55 
  13  -3   5   24.13    9.69 
  13   3   6    5.00    5.77 
  13  -3   6    9.15    7.84 
  13   3   7    0.61    6.00 
  13  -3   7   -3.29    5.95 
  13   3   8    2.63    2.73 
  13  -3   8    4.56    5.24 
  13   3   9    1.67    3.06 
  13  -3   9    2.32    4.17 
  13   3  10   -5.55    3.95 
  13  -3  10    9.92    3.46 
  13   3  11   -0.91    3.88 
  13  -3  11   10.28    8.75 
  13   3  12   -2.33    4.12 
  13  -3  12   -4.65    9.08 
  13   3  13   -4.17   10.23 
  13   3  14    9.43   10.88 
  13   4 -21   -4.44    5.30 
  13   4 -20    1.08    5.85 
  13   4 -19    2.21    6.25 
  13   4 -18   -3.33    4.47 
  13   4 -17    2.80    4.07 
  13   4 -16    3.96    7.03 
  13  -4 -16    6.89    4.71 
  13   4 -15   -2.89    4.66 
  13  -4 -15    5.36    2.20 
  13  -4 -14    1.48    2.35 
  13   4 -14    9.01    7.34 
  13   4 -13    2.72    3.20 
  13  -4 -13    8.40    4.46 
  13   4 -12   -5.05    6.17 
 -13   4  12    3.19    3.11 
  13  -4 -12    1.72    2.20 
  13  -4 -11    4.93    3.51 
  13   4 -11   10.70    5.97 
 -13   4  11    8.12    3.95 
  13  -4 -10    7.82    4.34 
 -13   4  10    2.76    2.20 
  13  -4  -9   21.85    5.84 
  13   4  -9   10.74    6.23 
 -13   4   9   19.47    6.06 
  13   4  -8   -1.21    2.35 
  13  -4  -8    1.96    2.07 
  13  -4  -8    0.11    1.59 
 -13   4   8    3.19    2.67 
  13  -4  -7   -0.06    3.23 
  13   4  -7    9.71    8.05 
 -13   4   7    3.28    3.65 
  13  -4  -7   -2.51    2.61 
  13  -4  -6    5.45    3.06 
  13  -4  -6    0.42    1.90 
 -13   4   6   -4.59    3.92 
  13  -4  -5   -0.36    1.92 
 -13   4   5   -0.82    3.26 
  13  -4  -5   -0.69    1.18 
  13  -4  -4    2.09    3.79 
 -13   4   4   11.78    4.90 
  13  -4  -4    4.24    2.20 
  13  -4  -3    1.21    2.95 
  13  -4  -2    9.65    6.08 
  13  -4  -1   -7.89    4.95 
  13  -4   0    7.27    5.61 
  13  -4   1    7.02    5.78 
  13   4   2    0.67    3.04 
  13  -4   2   -6.20    5.91 
  13   4   3   -1.05    2.96 
  13  -4   3   -2.52    5.17 
  13   4   4   -3.58    4.58 
  13  -4   4   -8.56    7.41 
  13   4   5    6.11    5.85 
  13  -4   5   -8.33    8.08 
  13   4   6   -0.68    3.40 
  13  -4   6   -4.72    3.52 
  13   4   7  -11.19    8.26 
  13  -4   7    3.41    5.39 
  13   4   8   -4.21    5.94 
  13  -4   8   17.95   10.37 
  13   4   9  -13.60    8.92 
  13  -4   9   -5.01    4.71 
  13   4  10   -1.43    3.66 
  13  -4  10   -3.46    8.20 
  13   4  11   -3.61    3.89 
  13  -4  11   -5.52    6.34 
  13   4  12    5.19    7.34 
  13  -4  12   -5.05    5.95 
  13   4  13   -5.60    7.18 
  13   5 -20   -7.75    5.91 
  13   5 -19    0.84    4.47 
  13   5 -18    5.36    8.48 
  13   5 -17    3.88    6.73 
  13   5 -16  -11.39    7.53 
  13   5 -15   -1.29    5.10 
  13   5 -14    2.75    5.07 
  13   5 -13   31.93   11.96 
  13   5 -12    4.85    5.48 
  13   5 -11   -1.32    6.52 
  13  -5 -11    6.25    2.54 
  13   5 -10    6.66    6.65 
 -13   5  10    5.38    3.66 
  13  -5 -10    4.29    2.61 
  13   5  -9    2.77    4.51 
 -13   5   9    5.85    3.67 
  13  -5  -9    7.97    4.99 
  13  -5  -9    5.14    1.41 
  13   5  -8    0.67    2.81 
  13  -5  -8    7.10    3.31 
 -13   5   8    2.24    4.20 
  13  -5  -8    2.65    2.16 
  13  -5  -7   -0.79    2.10 
  13  -5  -7    2.49    1.96 
 -13   5   7    2.23    3.59 
  13   5  -7    8.74    7.01 
  13  -5  -6    2.39    1.56 
  13  -5  -6    1.17    2.95 
 -13   5   6   -1.48    2.68 
  13  -5  -5    1.27    3.03 
  13  -5  -5    0.98    1.38 
 -13   5   5    2.51    2.65 
  13  -5  -4    0.34    1.02 
  13  -5  -4    4.29    4.67 
  13  -5  -3   10.85    6.30 
  13  -5  -3    3.16    1.64 
  13  -5  -2    2.61    3.32 
  13  -5  -1   -1.12    4.92 
  13  -5   0    8.15    3.66 
  13  -5   1   -0.34    3.29 
  13  -5   2   -2.02    5.03 
  13  -5   3    5.20    5.27 
  13  -5   4   12.78    7.60 
  13  -5   5    2.40    6.75 
  13   5   6   -3.94    5.66 
  13  -5   6   -5.65    5.91 
  13   5   7    9.14    5.29 
  13  -5   7    8.67    7.41 
  13   5   8   -6.91    8.71 
  13  -5   8   14.05    7.91 
  13   5   9   -0.41    3.67 
  13  -5   9   -8.29   11.24 
  13   5  10   -6.10    8.35 
  13  -5  10   -7.31   11.91 
  13   5  11    0.99    5.08 
  13  -5  11   -4.42    6.03 
  13   5  12   16.77   10.50 
  13   6 -19   -9.52    9.25 
  13   6 -18   13.57   12.33 
  13   6 -17   -6.90    6.21 
  13   6 -16   -2.59    7.45 
  13   6 -15   30.42   15.06 
  13   6 -14    0.80    5.42 
  13   6 -13   18.49   11.57 
  13   6 -12   -2.74    6.92 
  13   6 -11    8.87    9.25 
  13   6 -10   -3.44    5.90 
  13   6  -9   -1.95    3.41 
  13  -6  -9   -2.53    4.38 
  13  -6  -8    1.95    2.78 
  13   6  -8    6.94    7.39 
  13  -6  -7    5.61    4.16 
 -13   6   7   -3.45    2.49 
  13   6  -7   -4.86    4.43 
  13  -6  -6    1.41    1.84 
  13   6  -6   -2.38    3.03 
  13  -6  -5    4.71    4.40 
  13  -6  -4   -0.13    3.21 
  13  -6  -3    3.75    5.50 
  13  -6  -2    2.54    4.88 
  13  -6  -1   -3.37    4.48 
  13  -6   0   -3.18    4.50 
  13  -6   1   10.66    5.72 
  13  -6   2   23.18    9.72 
  13  -6   3    1.41    3.86 
  13  -6   4    5.29   10.23 
  13  -6   5   -7.54    5.43 
  13  -6   6    9.94   10.39 
  13  -6   7    4.33    8.19 
  13  -6   8   -2.13    6.82 
  13  -6   9   -5.12    7.51 
  13  -6  10   -1.20    6.92 
  13   7 -17    2.82    5.60 
  13   7 -16   -5.97    8.29 
  13   7 -15    7.84    6.85 
  13   7 -14    2.84    7.33 
  13   7 -13   13.91   12.85 
  13   7 -12   13.81   12.04 
  13   7 -11    5.42    5.24 
  13   7 -10   15.50   11.06 
  13   7  -9   -5.93    5.85 
  13  -7  -8    6.20    5.82 
  13   7  -8    5.74    7.32 
  13  -7  -7    1.22    2.56 
  13   7  -7   -0.33    4.10 
  13   7  -6   -0.17    3.60 
  13  -7  -6   10.10    4.76 
  13  -7  -5   -1.87    2.23 
  13  -7  -4   -2.25    3.90 
  13  -7  -3    7.83    3.80 
  13  -7  -2    2.81    4.23 
  13  -7  -1   -2.08    4.35 
  13  -7   0    7.10    6.25 
  13  -7   1   17.63    9.48 
  13  -7   2    1.02    4.03 
  13  -7   3   -3.31    8.08 
  13  -7   4    7.53    3.61 
  13  -7   5    0.42    4.29 
  13  -7   6    5.04    4.93 
  13  -7   7  -15.72   11.21 
  13  -7   8   -8.78   12.11 
  13   8 -16  -36.06   17.72 
  13   8 -15  -15.74    7.77 
  13   8 -14  -11.80    8.88 
  13   8 -13   -3.33    7.61 
  13   8 -12   -3.93    8.83 
  13   8 -11    0.57    6.67 
  13   8 -10   -0.36    6.09 
  13   8  -9    4.26    5.93 
  13   8  -8   -7.94    5.65 
  13   8  -7    5.25    7.20 
  13  -8  -6   -1.53    2.24 
  13   8  -6    0.75    4.52 
  13   8  -5    3.99    3.57 
  13  -8  -5    3.84    3.65 
  13  -8  -4    1.21    3.30 
  13  -8  -3   -2.40    3.76 
  13  -8  -2   -0.36    3.18 
  13  -8  -1   -4.17    7.52 
  13  -8   0    2.01    5.64 
  13  -8   1    0.49    2.84 
  13  -8   2   -1.32    4.12 
  13  -8   3    2.58    6.22 
  13  -8   4   15.61    9.13 
  13  -8   5   20.69    9.59 
  13  -8   6  -11.96   10.33 
  13  -8   7  -10.50    8.79 
  13   9 -14  -16.75   15.97 
  13   9 -13  -11.18    9.54 
  13   9 -12    3.36    5.66 
  13   9 -11   10.33    4.70 
  13   9 -10   -5.33    5.60 
  13   9  -9    0.44    4.13 
  13   9  -8   13.31    9.26 
  13   9  -7    6.87    7.63 
  13   9  -6    4.82    6.25 
  13   9  -5   -0.12    2.94 
  13  -9  -4   -9.87    7.93 
  13   9  -4    2.29    4.21 
  13  -9  -3   14.05    6.49 
  13  -9  -2   -1.43    2.58 
  13  -9  -1    1.45    3.53 
  13  -9   0  -14.68    8.86 
  13  -9   1    0.02    5.10 
  13  -9   2   -0.82    3.46 
  13  -9   3   -9.47   10.83 
  13  -9   4  -12.26    8.19 
  13  -9   5  -14.93   11.83 
  13  10 -11   10.24    6.69 
  13  10 -10   -0.85   10.41 
  13  10  -9    6.43    4.85 
  13  10  -8    1.42    5.47 
  13  10  -7   23.94   10.90 
  13  10  -6    2.59    6.39 
  13  10  -5   -3.02    4.90 
  13  10  -4   22.15   11.03 
  13  10  -3    3.03    6.78 
  13 -10   0   -9.26    5.01 
  13 -10   1  -11.27    3.38 
  13 -10   2   11.46    4.48 
  13 -10   3   -3.20    8.98 
  13 -10   4   -2.05    9.73 
  14   0 -23  -11.98    8.92 
  14   0 -22  -16.90    8.70 
  14   0 -21   17.48   10.05 
  14   0 -20    8.74    6.62 
  14   0 -19    5.25    3.50 
  14   0 -18   -3.55    3.81 
  14   0 -17   -4.32    7.21 
  14   0 -16   -5.52    5.74 
  14   0 -15    1.36    2.40 
  14   0 -14    2.53    4.46 
  14   0 -13    3.20    3.03 
  14   0 -12    2.37    2.95 
  14   0 -11    4.33    4.77 
  14   0 -10    4.01    4.33 
  14   0  -9    0.33    2.36 
  14   0  -8   -0.19    2.42 
  14   0  -7    7.49    5.20 
  14   0  -5   -2.05    2.97 
  14   0  -4    1.27    2.97 
  14   0  -3    3.58    4.25 
  14   0  -2    2.76    4.52 
  14   0  -1    4.17    3.56 
  14   0   0    0.12    2.89 
  14   0   1    1.66    2.74 
  14   0   2   10.57    5.27 
  14   0   3    5.51    5.22 
  14   0   4    1.62    2.62 
  14   0   5   -6.05    5.66 
  14   0   6    8.51    6.44 
  14   0   7   -7.51    7.21 
  14   0   8    4.85    7.00 
  14   0   9    4.99    4.21 
  14   0  10   16.17    7.89 
  14   0  11   -8.48    5.66 
  14   0  12    6.43    4.31 
  14   0  13   -5.97    5.38 
  14  -1 -23    6.70    9.39 
  14  -1 -22   13.33    9.99 
  14   1 -22   -0.11    7.01 
  14   1 -21   -4.83    7.34 
  14  -1 -21    8.21    5.64 
  14   1 -20    7.64    7.48 
  14  -1 -20   -0.83    3.43 
  14   1 -19   -5.38    6.56 
  14  -1 -19    4.71    5.17 
  14  -1 -18    2.87    2.97 
  14   1 -18    4.82    6.57 
  14  -1 -17   10.15    5.67 
  14   1 -17    8.51    6.91 
  14  -1 -16   10.95    7.45 
  14   1 -16    7.74    7.30 
  14  -1 -15    5.92    3.17 
  14   1 -15    6.02    5.89 
  14  -1 -14    4.44    3.76 
  14   1 -14   13.15    7.72 
  14  -1 -13    2.46    2.74 
  14   1 -13    3.05    3.17 
 -14   1  12   27.10    8.89 
  14   1 -12   16.20    7.31 
  14  -1 -12   13.94    7.15 
  14  -1 -11    0.24    2.19 
 -14   1  11    1.43    2.95 
 -14   1  10    3.65    2.35 
  14  -1 -10   -1.47    2.66 
  14   1 -10   -0.29    3.71 
 -14   1   9    2.85    4.01 
  14   1  -9    2.84    3.58 
  14  -1  -9   -1.27    3.34 
  14  -1  -8   10.65    5.47 
  14   1  -8   17.07    7.24 
  14  -1  -7    0.66    2.72 
  14   1  -7   -0.02    3.92 
  14  -1  -6    4.10    3.06 
  14  -1  -6    5.36    4.43 
  14  -1  -5   90.05   16.10 
  14  -1  -4   12.15    6.44 
  14   1  -4   14.98    6.79 
  14  -1  -3    0.30    3.18 
  14   1  -3    4.09    5.25 
  14  -1  -2   -3.65    6.30 
  14   1  -2  -10.05    6.29 
  14  -1  -1    9.37    6.48 
  14   1  -1   15.14    7.66 
  14  -1   0   -4.52    4.86 
  14   1   0    8.16    6.80 
  14  -1   1   -2.17    4.71 
  14   1   1   -2.36    4.59 
  14  -1   2    7.06    6.04 
  14   1   2    3.27    2.28 
  14  -1   3   -6.02    6.98 
  14   1   3   -1.14    4.23 
  14  -1   4   -2.51    3.91 
  14   1   4    0.38    2.38 
  14  -1   5   -2.33    3.03 
  14   1   5    1.76    4.36 
  14  -1   6    0.43    7.30 
  14   1   6   -2.13    4.44 
  14  -1   7   -5.80    6.51 
  14   1   7    8.44    5.99 
  14  -1   8   11.38    7.25 
  14   1   8    3.91    5.23 
  14  -1   9   20.16   10.28 
  14   1   9    2.92    4.96 
  14  -1  10    3.39    7.14 
  14   1  10   -5.79    6.39 
  14  -1  11    1.39    5.20 
  14   1  11  -16.28   10.42 
  14  -1  12  -11.90   10.57 
  14   1  12  -13.89   11.26 
  14  -1  13   -7.10    7.27 
  14   1  13    8.08    7.45 
  14   2 -22  -12.61   11.23 
  14   2 -21    8.41   11.12 
  14  -2 -21   -4.92    6.64 
  14   2 -20   -4.70    8.87 
  14  -2 -20    0.29    3.83 
  14   2 -19   24.77   11.80 
  14  -2 -19   14.81    9.50 
  14   2 -18   10.97    9.40 
  14  -2 -18    4.64    5.02 
  14  -2 -17   -1.39    4.39 
  14   2 -17    6.10    3.47 
  14  -2 -16   13.23    7.00 
  14   2 -16   14.55    9.60 
  14  -2 -15    1.59    2.76 
  14   2 -15    4.49    2.76 
 -14   2  14    7.75    4.24 
  14  -2 -14   -1.33    3.19 
  14   2 -14    6.15    5.72 
  14   2 -13   38.78   13.29 
 -14   2  13   55.32   11.05 
  14  -2 -13   35.94   10.83 
 -14   2  12    4.08    2.64 
  14   2 -12    5.64    6.34 
  14  -2 -12    3.04    3.38 
 -14   2  11   -0.33    4.09 
  14   2 -11   -3.64    4.64 
  14  -2 -11   -1.20    1.96 
 -14   2  10   -2.36    4.04 
  14  -2 -10    0.79    2.16 
  14   2 -10    1.62    2.39 
  14  -2  -9   13.21    5.91 
  14   2  -9   10.69    6.53 
 -14   2   9    4.71    3.81 
  14   2  -8   16.50    7.91 
  14  -2  -8   13.84    5.25 
 -14   2   8   18.37    6.03 
  14  -2  -7   -0.99    4.37 
  14   2  -7    3.04    4.85 
 -14   2   7   -1.13    2.48 
  14  -2  -6    6.60    2.61 
  14  -2  -6   29.66    7.70 
  14  -2  -5   23.32    8.46 
  14  -2  -4    1.59    2.56 
  14  -2  -3   -0.68    2.57 
  14  -2  -2   18.38    8.29 
  14   2  -2   21.17    8.32 
  14  -2  -1   15.17    7.35 
  14   2  -1   11.77    6.42 
  14  -2   0   21.77    8.83 
  14   2   0   22.54   10.08 
  14  -2   1   40.22   12.61 
  14   2   1   43.16   12.90 
  14  -2   2    9.69    5.70 
  14   2   2   22.72    9.82 
  14  -2   3   10.91    6.61 
  14   2   3    8.53    6.44 
  14  -2   4    9.35    6.00 
  14   2   4    9.49    5.37 
  14  -2   5    8.60    7.08 
  14   2   5    2.08    5.05 
  14  -2   6    5.05    8.63 
  14   2   6    2.12    5.89 
  14  -2   7    9.38    8.02 
  14   2   7    3.64    3.47 
  14  -2   8   -2.05    4.36 
  14   2   8    6.96    8.30 
  14  -2   9  -11.54    8.24 
  14   2   9    0.97    6.79 
  14  -2  10  -14.03   11.31 
  14   2  10    1.70    4.44 
  14  -2  11    0.09    8.03 
  14   2  11   -8.38   10.47 
  14  -2  12   21.34   12.38 
  14   2  12   -0.99    4.27 
  14   2  13    0.69    9.31 
  14   3 -21  -10.56    9.73 
  14   3 -20    4.74    5.35 
  14   3 -19   -5.73    8.17 
  14  -3 -19    6.40    7.07 
  14   3 -18   -1.24    4.85 
  14  -3 -18   -1.77    5.74 
  14   3 -17   -2.00    6.28 
  14  -3 -17    4.02    5.39 
  14   3 -16    8.46    8.10 
  14  -3 -16    2.24    3.71 
  14  -3 -15    9.42    6.42 
  14   3 -15    1.83    7.10 
  14  -3 -14    0.93    4.37 
  14   3 -14   -1.92    4.53 
  14   3 -13   -6.07    5.56 
  14  -3 -13   -3.75    3.61 
 -14   3  13   -1.29    3.84 
  14  -3 -12   -1.21    2.38 
  14   3 -12   -1.72    7.41 
 -14   3  12   -3.13    4.42 
  14  -3 -11   68.38   12.04 
  14   3 -11   47.88   13.62 
 -14   3  11   65.57   12.34 
  14   3 -10   -0.22    3.27 
  14  -3 -10   14.14    6.02 
 -14   3  10    4.73    4.73 
  14   3  -9   13.41    7.97 
 -14   3   9   15.79    6.48 
  14  -3  -9   10.92    5.19 
  14  -3  -8    5.54    3.90 
  14  -3  -8    0.90    2.83 
  14   3  -8   -0.93    4.59 
 -14   3   8   -6.89    2.07 
  14  -3  -7   -1.82    3.00 
  14   3  -7    3.92    4.46 
  14  -3  -7   -3.88    2.41 
 -14   3   7   -1.80    5.28 
  14  -3  -6    9.87    3.53 
  14  -3  -6   -0.82    3.90 
 -14   3   6    3.87    2.65 
  14  -3  -5   32.01    9.55 
  14  -3  -5   34.55    8.08 
  14  -3  -4    6.81    5.07 
  14  -3  -3   17.23    8.10 
  14  -3  -2    3.48    6.25 
  14  -3  -1   -0.01    2.48 
  14  -3   0   -1.41    5.03 
  14   3   0    3.05    3.40 
  14  -3   1   43.34   12.84 
  14   3   1   53.04   14.09 
  14  -3   2   -5.97    5.55 
  14   3   2    3.15    4.17 
  14  -3   3   23.37    9.59 
  14   3   3   15.82    9.11 
  14  -3   4   -2.15    4.59 
  14   3   4    3.44    5.57 
  14  -3   5    8.00    6.67 
  14   3   5    3.81    5.65 
  14   3   6   -6.19    3.66 
  14  -3   6   10.23    6.35 
  14   3   7    8.45    7.54 
  14  -3   7    1.41    4.76 
  14   3   8   -1.15    5.53 
  14  -3   8   -1.94    7.72 
  14   3   9    6.64    7.16 
  14  -3   9    1.76    4.84 
  14   3  10   -8.15    7.77 
  14  -3  10    7.59    8.86 
  14   3  11    3.00    4.57 
  14  -3  11   11.93    7.29 
  14   3  12   -7.90    9.61 
  14   3  13   -0.92    8.54 
  14   4 -20   -2.94    4.97 
  14   4 -19    5.60    5.49 
  14   4 -18  -11.69    9.34 
  14   4 -17    4.06    4.82 
  14  -4 -17   -7.42    5.37 
  14   4 -16    4.74    7.99 
  14  -4 -16    0.74    2.34 
  14  -4 -15   -0.73    3.21 
  14   4 -15    3.32    6.44 
  14   4 -14    3.50    5.59 
  14  -4 -14   18.46    7.06 
  14   4 -13    7.01    6.66 
  14  -4 -13   23.40    8.11 
  14  -4 -12   -1.64    4.21 
  14   4 -12    3.26    7.27 
  14  -4 -11   -1.84    4.05 
 -14   4  11   -3.70    1.95 
  14   4 -11    2.15    3.75 
  14   4 -10   -4.90    6.43 
  14  -4 -10    5.35    3.49 
 -14   4  10  -12.18    7.44 
  14  -4  -9   24.27    7.08 
 -14   4   9   26.13    8.66 
  14   4  -9   23.39    9.95 
  14  -4  -8    8.85    2.95 
  14  -4  -8   11.93    4.36 
 -14   4   8   13.59    4.32 
  14   4  -8    7.11    5.48 
  14  -4  -7    1.50    2.29 
 -14   4   7    4.15    4.22 
  14   4  -7    2.98    3.25 
  14  -4  -7    3.00    2.45 
  14  -4  -6   20.52    7.87 
  14  -4  -6   27.93    6.29 
 -14   4   6   40.51   10.82 
  14  -4  -5    2.82    1.79 
  14  -4  -5   13.03    6.97 
  14  -4  -4    5.77    4.90 
  14  -4  -4   -0.16    2.62 
  14  -4  -3    4.05    5.24 
  14  -4  -2    4.91    4.67 
  14  -4  -1   -2.50    3.08 
  14  -4   0   11.03    7.23 
  14  -4   1   -2.81    4.33 
  14  -4   2    9.80    6.56 
  14   4   2    5.21    6.14 
  14   4   3   -5.26    7.03 
  14  -4   3   11.35    8.43 
  14   4   4    3.16    5.11 
  14  -4   4   -6.86    6.79 
  14   4   5    4.23    5.03 
  14  -4   5   -8.79    7.61 
  14   4   6    3.37    6.50 
  14  -4   6   14.51    9.01 
  14   4   7   16.78   11.79 
  14  -4   7  -11.47   10.47 
  14   4   8  -11.93    9.15 
  14  -4   8   -5.24    7.25 
  14   4   9    2.76    5.32 
  14  -4   9  -11.37   14.53 
  14   4  10    2.35    9.23 
  14  -4  10    5.96    4.47 
  14   4  11    2.64    6.56 
  14  -4  11    2.34    7.57 
  14   4  12   13.05   11.16 
  14   4  13  -19.78   14.99 
  14   5 -19  -24.63   14.51 
  14   5 -18  -14.23   11.14 
  14   5 -17   -1.60    3.40 
  14   5 -16   -0.53    4.12 
  14   5 -15    7.74    8.72 
  14   5 -14   15.56    9.11 
  14   5 -13    9.67    8.19 
  14   5 -12    5.14    5.01 
  14  -5 -12    1.82    1.66 
  14   5 -11    4.20    4.58 
  14  -5 -11    2.57    2.47 
  14   5 -10    2.98    3.30 
  14  -5 -10    1.38    3.15 
 -14   5   9    2.01    5.08 
  14  -5  -9    0.24    3.20 
  14   5  -9    2.43    4.97 
  14  -5  -9   -4.04    2.47 
  14  -5  -8    6.77    3.10 
  14  -5  -8    9.30    5.08 
  14   5  -8    3.93    4.53 
 -14   5   8    7.14    5.21 
  14  -5  -7   -0.65    1.65 
  14  -5  -7   -1.17    3.84 
 -14   5   7    3.60    4.41 
  14   5  -7   -0.58    3.27 
  14  -5  -6   -7.60    5.70 
  14  -5  -6   -2.26    2.27 
  14  -5  -5   -0.99    3.86 
  14  -5  -5    0.87    1.36 
  14  -5  -4   28.72    9.84 
  14  -5  -4   34.57    5.72 
  14  -5  -3    3.21    2.18 
  14  -5  -3    0.44    1.58 
  14  -5  -2    2.43    3.01 
  14  -5  -1   -6.18    6.05 
  14  -5   0  -12.66    8.69 
  14  -5   1   22.36   10.26 
  14  -5   2   11.49    8.35 
  14  -5   3    4.21    2.63 
  14  -5   4   -4.84    7.34 
  14  -5   5   -6.96    5.04 
  14  -5   6    5.69    7.17 
  14   5   7    2.04    4.63 
  14  -5   7   18.03    9.66 
  14   5   8   -3.56    6.15 
  14  -5   8   -2.36    4.95 
  14   5   9   -1.90    5.91 
  14  -5   9    6.24    9.11 
  14   5  10   -3.37    4.13 
  14  -5  10   10.02    8.54 
  14   5  11   14.95    8.48 
  14   5  12   11.02   11.48 
  14   6 -18    3.98    9.31 
  14   6 -17    0.02    5.92 
  14   6 -16    3.39    8.38 
  14   6 -15    6.47    6.82 
  14   6 -14   20.48   10.58 
  14   6 -13    4.64    6.59 
  14   6 -12    0.67    6.13 
  14   6 -11  -10.63    8.67 
  14   6 -10    1.07    3.65 
  14   6  -9   -1.55    6.21 
  14  -6  -9    0.17    2.66 
  14   6  -8   -2.34    5.95 
  14  -6  -8    4.28    3.40 
  14  -6  -7    0.67    3.45 
  14   6  -7   18.58    9.72 
  14  -6  -6    1.91    1.94 
  14  -6  -5   -5.24    4.66 
  14  -6  -4    2.58    4.15 
  14  -6  -3    0.25    3.43 
  14  -6  -2    3.98    4.21 
  14  -6  -1   -3.54    2.98 
  14  -6   0   10.64    7.46 
  14  -6   1    1.62    3.14 
  14  -6   2    1.55    6.10 
  14  -6   3  -10.83    8.37 
  14  -6   4   -2.86    9.95 
  14  -6   5  -10.83    9.43 
  14  -6   6   13.72    9.81 
  14  -6   7    1.51    6.23 
  14  -6   8   -8.65   10.54 
  14  -6   9   22.84   11.66 
  14   7 -17   -1.33    9.36 
  14   7 -16    3.23    6.95 
  14   7 -15   15.00   11.10 
  14   7 -14    0.32    3.55 
  14   7 -13   -4.29    3.64 
  14   7 -12    2.64    4.65 
  14   7 -11    4.57    3.92 
  14   7 -10   -1.17    5.79 
  14   7  -9   -3.78    6.38 
  14  -7  -8    1.03    2.33 
  14   7  -8   -8.25    7.00 
  14  -7  -7   -0.90    3.94 
  14   7  -7    5.37    8.12 
  14  -7  -6   -0.17    3.58 
  14   7  -6    5.42    5.79 
  14  -7  -5    2.84    3.87 
  14  -7  -4   -3.92    3.57 
  14  -7  -3   -0.67    3.98 
  14  -7  -2   -1.75    4.98 
  14  -7  -1   -2.18    4.44 
  14  -7   0   -8.95    6.71 
  14  -7   1    7.56    5.24 
  14  -7   2   -6.58    9.35 
  14  -7   3   -6.50    6.96 
  14  -7   4   13.11    7.86 
  14  -7   5  -11.56   12.24 
  14  -7   6    5.31    5.36 
  14  -7   7   -0.12    6.66 
  14   8 -15    2.18    8.99 
  14   8 -14   -7.13   12.84 
  14   8 -13   -1.71    5.35 
  14   8 -12    0.82    3.61 
  14   8 -11   -7.39    3.96 
  14   8 -10    8.14    9.28 
  14   8  -9    6.91    8.02 
  14   8  -8    2.23    3.24 
  14   8  -7   -1.45    4.61 
  14   8  -6    3.41    5.58 
  14  -8  -6   -6.85    6.45 
  14  -8  -5    6.65    3.55 
  14   8  -5   -1.42    3.43 
  14  -8  -4   -4.30    5.77 
  14  -8  -3   -3.26    5.99 
  14  -8  -2   -2.68    4.49 
  14  -8  -1    7.68    7.69 
  14  -8   0   -0.82    2.88 
  14  -8   1    6.27    6.36 
  14  -8   2   -0.04    8.81 
  14  -8   3   -1.58    5.25 
  14  -8   4   12.46    8.58 
  14  -8   5   -6.09    6.48 
  14  -8   6   -1.05    6.73 
  14   9 -12   -7.96    6.73 
  14   9 -11   -7.41    7.01 
  14   9 -10   -6.08    6.80 
  14   9  -9   12.23    9.43 
  14   9  -8    6.28    6.58 
  14   9  -7   -0.84    5.40 
  14   9  -6   -1.20    7.17 
  14   9  -5   -3.34    3.77 
  14   9  -4    5.93    8.43 
  14  -9  -3   18.75    8.24 
  14  -9  -2    4.37    5.61 
  14  -9  -1   -1.14    3.09 
  14  -9   0    4.31    4.10 
  14  -9   1   12.14    9.74 
  14  -9   2  -13.70    9.00 
  14  -9   3    9.35   10.42 
  14  -9   4  -12.10   11.99 
  14  10  -8    2.81    9.35 
  14  10  -7    9.64   14.91 
  14  10  -6  -11.03    7.07 
  14  10  -5    3.77    7.95 
  14  10  -4   20.74   10.51 
  14  10  -3   11.66   11.42 
  14 -10   0  -32.28   13.14 
  14 -10   1  -11.05   14.78 
  14 -10   2  -16.49   13.62 
  14 -10   3  -11.72   15.38 
  15   0 -22    8.19    9.20 
  15   0 -21    5.24    7.07 
  15   0 -20    1.49    3.67 
  15   0 -19   -3.49    7.56 
  15   0 -18    1.78    4.20 
  15   0 -17   -4.84    6.36 
  15   0 -16    0.81    3.88 
  15   0 -15   -0.40    2.42 
  15   0 -14    6.60    6.92 
  15   0 -13   -7.04    6.17 
  15   0 -12    0.50    2.24 
  15   0 -11    0.09    3.24 
  15   0 -10   -0.16    3.20 
  15   0  -9    1.59    4.09 
  15   0  -8    1.46    3.40 
  15   0  -7    1.19    2.97 
  15   0  -5   -1.19    2.88 
  15   0  -4   34.56   10.97 
  15   0  -3   -1.83    2.86 
  15   0  -2    7.45    5.41 
  15   0  -1    1.01    3.45 
  15   0   0   -0.25    4.49 
  15   0   1   -3.71    5.45 
  15   0   2   12.39    7.99 
  15   0   3    1.90    4.55 
  15   0   4   -2.13    6.05 
  15   0   5    2.71    5.01 
  15   0   6   -2.77    3.82 
  15   0   7    3.19    6.84 
  15   0   8   -2.11    3.78 
  15   0   9    9.91    4.43 
  15   0  10   10.27    7.35 
  15   0  11    3.34    8.77 
  15   0  12  -10.94    8.70 
  15  -1 -23   18.76   10.50 
  15  -1 -22   26.78   14.97 
  15   1 -22    7.13   12.96 
  15   1 -21    6.35    4.79 
  15  -1 -21   14.59    8.90 
  15   1 -20   10.60    8.84 
  15  -1 -20   26.20   11.87 
  15  -1 -19   -2.99    3.07 
  15   1 -19    1.01    2.73 
  15  -1 -18   -3.42    5.58 
  15   1 -18    7.06    6.14 
  15  -1 -17   -0.11    6.19 
  15   1 -17   -4.17    3.83 
  15  -1 -16   -4.61    4.99 
  15   1 -16   14.45    7.43 
  15  -1 -15   -7.30    6.25 
  15   1 -15   -0.81    3.23 
  15  -1 -14   19.94    8.39 
  15   1 -14   24.34    9.29 
  15   1 -13    6.25    5.61 
  15  -1 -13   -1.15    3.11 
  15   1 -12   11.98    7.43 
  15  -1 -12   10.45    7.07 
  15  -1 -11    5.55    4.67 
  15   1 -11   -5.17    4.67 
  15   1 -10    0.28    2.79 
  15  -1 -10    3.04    3.36 
  15   1  -9   -6.82    4.00 
  15  -1  -9    0.18    3.76 
  15  -1  -8    2.20    2.92 
  15   1  -8   -0.50    3.51 
  15   1  -7   -2.78    3.66 
  15  -1  -7   -1.62    1.86 
  15  -1  -6    4.64    4.50 
  15  -1  -5   87.79   16.66 
  15  -1  -4   22.98    8.87 
  15   1  -4   30.92   10.28 
  15  -1  -3    1.30    4.32 
  15   1  -3    5.26    4.33 
  15  -1  -2    0.74    3.47 
  15   1  -2    7.32    5.72 
  15  -1  -1   13.79    8.99 
  15   1  -1    9.50    4.81 
  15  -1   0   13.71    7.85 
  15   1   0   25.95   10.26 
  15  -1   1   -1.77    2.70 
  15   1   1    1.11    2.93 
  15  -1   2   -5.81    6.84 
  15   1   2   -1.35    2.47 
  15  -1   3   -2.53    4.62 
  15   1   3    2.87    4.13 
  15  -1   4    4.39    4.64 
  15   1   4    6.48    6.52 
  15  -1   5   -4.76    6.32 
  15   1   5    5.95    8.19 
  15  -1   6    0.02    7.45 
  15   1   6   -0.76    4.92 
  15  -1   7    0.28    2.83 
  15   1   7    1.85    7.29 
  15  -1   8   -6.71    4.94 
  15   1   8   -7.47    8.10 
  15  -1   9   39.30   14.78 
  15   1   9   14.49    7.73 
  15  -1  10   11.85    7.02 
  15   1  10   -0.61    5.38 
  15  -1  11   15.41    9.58 
  15   1  11    3.23    5.89 
  15   1  12   -7.13   10.34 
  15  -2 -22   -3.91    3.30 
  15   2 -21   24.47   12.93 
  15  -2 -21  -15.03    9.65 
  15   2 -20   -0.98    5.58 
  15  -2 -20    0.02    4.18 
  15   2 -19    2.15    5.33 
  15  -2 -19   10.16    3.51 
  15   2 -18    8.01    6.20 
  15  -2 -18    2.81    4.23 
  15  -2 -17    6.99    6.12 
  15   2 -17    3.74    3.98 
  15  -2 -16    5.40    3.70 
  15   2 -16    1.81    3.43 
  15  -2 -15   -5.99    5.98 
  15   2 -15    4.43    4.73 
  15  -2 -14   -3.06    3.46 
  15   2 -14    3.64    5.94 
  15   2 -13    2.12    2.90 
  15  -2 -13    1.19    3.27 
  15   2 -12   56.16   14.31 
  15  -2 -12   75.09   14.77 
  15   2 -11    5.45    6.09 
  15  -2 -11   10.66    5.01 
  15  -2 -10   33.37    8.89 
  15   2 -10   39.63   11.61 
  15  -2  -9   -2.78    3.98 
  15   2  -9   -7.98    6.10 
  15  -2  -8    7.67    4.30 
  15   2  -8   10.53    5.88 
  15  -2  -7   -7.45    5.56 
  15  -2  -7    1.55    3.48 
  15  -2  -6   27.58    8.10 
  15  -2  -6   11.69    5.80 
  15  -2  -5    6.77    5.62 
  15  -2  -4   -1.76    3.96 
  15  -2  -3   21.46    9.07 
  15  -2  -2   11.14    7.17 
  15   2  -2   18.09    9.81 
  15  -2  -1   -3.84    4.77 
  15   2  -1   -3.72    4.92 
  15  -2   0   15.59    7.75 
  15   2   0   23.28    9.63 
  15  -2   1    4.05    4.70 
  15   2   1    2.13    2.60 
  15  -2   2   42.90   13.30 
  15   2   2   17.81    8.68 
  15  -2   3    2.67    5.05 
  15   2   3    4.56    8.18 
  15  -2   4   20.15    9.79 
  15   2   4   20.38    9.93 
  15  -2   5   -1.76    2.98 
  15   2   5    1.22    5.19 
  15  -2   6    1.22    5.35 
  15   2   6   -3.56    4.33 
  15  -2   7   -3.06    4.59 
  15   2   7    3.35    4.95 
  15  -2   8   11.51    8.69 
  15   2   8  -27.42   11.59 
  15  -2   9   -3.35    8.13 
  15   2   9   17.62   10.73 
  15  -2  10   -3.86    6.87 
  15   2  10   -3.37    4.75 
  15  -2  11   -5.28    9.00 
  15   2  11   21.58   14.96 
  15   2  12    3.82    7.85 
  15   3 -21   11.69    7.63 
  15   3 -20   15.36   10.88 
  15  -3 -20  -10.19    6.69 
  15   3 -19   12.69   10.46 
  15  -3 -19   -1.12    2.88 
  15   3 -18   -1.46    7.40 
  15  -3 -18    0.59    3.38 
  15   3 -17   -3.17    5.01 
  15  -3 -17   27.89    9.70 
  15   3 -16    9.02    8.59 
  15  -3 -16    6.26    4.37 
  15  -3 -15   -4.27    4.30 
  15   3 -15    6.81    4.27 
  15   3 -14   12.37    8.42 
  15  -3 -14   10.24    5.72 
  15   3 -13   -0.92    4.31 
  15  -3 -13   -2.06    4.59 
  15  -3 -12   11.47    4.12 
  15   3 -12   15.11    7.66 
  15  -3 -11    4.68    4.60 
  15   3 -11    3.30    2.55 
 -15   3  11    1.50    3.11 
  15   3 -10    2.29    2.93 
  15  -3 -10   -2.24    2.62 
  15  -3  -9   -5.88    3.78 
 -15   3   9   -6.36    6.67 
  15   3  -9   -2.62    4.93 
  15   3  -8    1.37    3.89 
  15  -3  -8    8.12    4.59 
  15  -3  -8    2.62    2.67 
  15  -3  -7    6.03    4.00 
  15  -3  -7   -1.49    2.83 
  15  -3  -6   -1.50    3.08 
  15  -3  -6    2.98    3.93 
  15  -3  -5   -0.80    2.93 
  15  -3  -5    2.69    2.15 
  15  -3  -4    7.28    5.36 
  15  -3  -3   -1.69    3.18 
  15  -3  -2    5.21    4.16 
  15  -3  -1    7.36    5.65 
  15  -3   0    9.63    5.91 
  15   3   0   10.52    8.31 
  15  -3   1   -1.82    4.11 
  15   3   1   -4.16    5.43 
  15  -3   2    3.35    3.33 
  15   3   2    3.54    4.85 
  15  -3   3    3.23    4.21 
  15   3   3   -5.82    3.05 
  15  -3   4    3.66    5.92 
  15   3   4   -1.17    5.80 
  15  -3   5   -9.54    5.20 
  15   3   5   -2.56    3.14 
  15  -3   6    4.41    3.91 
  15   3   6    2.78    3.03 
  15  -3   7  -12.62   10.49 
  15   3   7    4.08    7.48 
  15  -3   8  -13.33    8.51 
  15   3   8    7.38    6.68 
  15  -3   9    6.91    6.27 
  15   3   9  -11.79   10.68 
  15  -3  10    1.33    8.49 
  15   3  10   -8.39    8.86 
  15   3  11   -1.63    6.10 
  15   3  12  -17.27   12.07 
  15   4 -20   -7.99    8.07 
  15   4 -19    4.34    3.18 
  15   4 -18   10.06    3.95 
  15   4 -17   -9.46    9.03 
  15  -4 -17   -9.04    6.28 
  15   4 -16    1.62    3.58 
  15  -4 -16   -1.95    3.65 
  15  -4 -15    8.36    3.14 
  15   4 -15   10.53    4.64 
  15   4 -14   -5.36    6.38 
  15  -4 -14   -2.75    2.63 
  15  -4 -13    7.37    4.61 
  15   4 -13   12.89    7.80 
  15  -4 -12    6.96    2.45 
  15   4 -12   -3.48    4.76 
  15  -4 -11    2.94    2.47 
  15   4 -11   -1.74    3.73 
  15   4 -10   -4.52    4.64 
  15  -4 -10    3.96    3.08 
  15  -4  -9    1.90    2.33 
  15   4  -9   -4.63    4.47 
  15   4  -8    2.04    4.37 
  15  -4  -8   -1.84    2.02 
  15  -4  -8    3.97    4.01 
  15  -4  -7    0.91    1.41 
  15   4  -7    5.80    4.63 
  15  -4  -7   -4.84    5.69 
  15  -4  -6    2.91    3.14 
  15  -4  -6    9.69    3.74 
  15  -4  -5   10.58    4.57 
  15  -4  -5    6.62    4.56 
  15  -4  -4   -0.70    3.22 
  15  -4  -4   -1.72    2.37 
  15  -4  -3   -6.95    5.16 
  15  -4  -2    8.25    6.71 
  15  -4  -1   -0.51    5.08 
  15  -4   0    0.97    3.15 
  15  -4   1   12.86    7.44 
  15  -4   2    5.72    7.09 
  15  -4   3   -3.76    9.14 
  15   4   3    5.93    6.71 
  15  -4   4    6.12    3.52 
  15   4   4    3.35    7.25 
  15  -4   5  -11.22   10.51 
  15   4   5    0.16    5.52 
  15   4   6   -1.54    3.65 
  15  -4   6   -8.13    7.28 
  15   4   7   -6.77    8.09 
  15  -4   7    6.21    6.07 
  15   4   8   -1.59    3.81 
  15  -4   8   -2.37    6.45 
  15   4   9    5.21    4.99 
  15  -4   9   -4.60    8.85 
  15   4  10  -17.24    9.82 
  15   4  11    0.24    6.93 
  15   4  12   -8.24    5.24 
  15   5 -19   -1.81    7.70 
  15   5 -18   -8.03   11.59 
  15   5 -17  -10.15    9.00 
  15   5 -16    4.74    4.71 
  15   5 -15    2.78    7.24 
  15   5 -14   17.26   11.50 
  15   5 -13    2.93    3.72 
  15  -5 -13    1.87    3.06 
  15   5 -12  -11.72    8.22 
  15  -5 -12    4.47    4.12 
  15   5 -11   -1.65    5.05 
  15  -5 -11   -4.23    3.12 
  15   5 -10   -4.32    4.73 
  15  -5 -10   -0.72    2.72 
  15  -5  -9   -0.57    1.39 
  15  -5  -9   -3.00    2.57 
  15   5  -9    1.36    5.78 
  15  -5  -8    1.21    1.76 
  15  -5  -8    4.55    4.74 
  15   5  -8    3.33    3.79 
  15  -5  -7   -2.04    5.09 
  15  -5  -7    1.40    2.24 
  15   5  -7    4.29    5.64 
  15  -5  -6    4.09    4.33 
  15  -5  -6   -3.82    2.99 
  15  -5  -5   -0.91    1.85 
  15  -5  -5   -1.30    2.50 
  15  -5  -4    7.09    4.66 
  15  -5  -4    7.64    4.06 
  15  -5  -3    3.15    5.27 
  15  -5  -3    2.93    1.52 
  15  -5  -2    4.67    4.59 
  15  -5  -1   10.28    6.64 
  15  -5   0   -0.30    5.98 
  15  -5   1   -1.86    4.04 
  15  -5   2    7.51    6.15 
  15  -5   3   15.16    8.68 
  15  -5   4   -5.23    8.32 
  15  -5   5    8.84    7.45 
  15  -5   6   -3.06    4.29 
  15   5   7    5.70    3.97 
  15  -5   7   -9.13    6.60 
  15   5   8   -2.14    5.71 
  15  -5   8    0.17    4.70 
  15   5   9  -22.22   14.29 
  15   5  10   20.26    9.89 
  15   5  11  -32.72   17.66 
  15   6 -17   -2.62    8.28 
  15   6 -16    3.79    5.27 
  15   6 -15   -2.93    6.07 
  15   6 -14  -17.25    8.38 
  15   6 -13   20.51   10.15 
  15   6 -12   10.68    9.06 
  15   6 -11   -5.17    4.35 
  15   6 -10    3.64    4.21 
  15  -6  -9   -1.43    2.76 
  15   6  -9    0.43    3.80 
  15   6  -8   -5.71    7.24 
  15  -6  -8   -1.72    5.04 
  15  -6  -7    5.63    3.50 
  15   6  -7   -2.35    4.94 
  15  -6  -6    1.74    3.21 
  15  -6  -5    1.55    4.80 
  15  -6  -4    8.09    6.23 
  15  -6  -3    4.00    2.33 
  15  -6  -2    0.47    4.14 
  15  -6  -1   -4.31    5.37 
  15  -6   0   28.28   10.50 
  15  -6   1    0.96    3.51 
  15  -6   2    5.15    4.53 
  15  -6   3   -8.64    8.24 
  15  -6   4   -0.99    5.27 
  15  -6   5   -9.64    8.80 
  15  -6   6  -19.01   11.87 
  15  -6   7    7.09    8.24 
  15   7 -16   23.34   12.38 
  15   7 -15  -31.39   13.19 
  15   7 -14  -10.30   10.09 
  15   7 -13   -2.29    3.65 
  15   7 -12    5.43    5.28 
  15   7 -11    6.58    3.53 
  15   7 -10   -0.18    3.35 
  15   7  -9   10.40    9.47 
  15   7  -8    0.93    6.05 
  15  -7  -8    1.37    4.08 
  15  -7  -7   -5.78    6.01 
  15   7  -7    5.52    6.84 
  15  -7  -6   -0.28    4.94 
  15   7  -6   -1.34    3.24 
  15  -7  -5    2.50    2.63 
  15  -7  -4   -2.53    4.43 
  15  -7  -3    3.14    5.47 
  15  -7  -2    3.01    3.20 
  15  -7  -1    2.16    3.74 
  15  -7   0   -6.86    7.42 
  15  -7   1   -2.05    4.81 
  15  -7   2   18.09   11.96 
  15  -7   3   15.42   10.30 
  15  -7   4   16.13    8.78 
  15  -7   5  -10.40    8.27 
  15  -7   6   -6.11    9.51 
  15   8 -14    5.21    7.81 
  15   8 -13    7.56    4.84 
  15   8 -12   26.74   13.11 
  15   8 -11    8.38    7.60 
  15   8 -10   -2.49    7.01 
  15   8  -9    3.43    6.56 
  15   8  -8   -5.99    5.26 
  15   8  -7   -1.77    4.12 
  15   8  -6  -13.25    9.22 
  15  -8  -5    5.25    3.88 
  15   8  -5   12.24    9.46 
  15  -8  -4   -0.97    3.18 
  15  -8  -3    2.82    4.42 
  15  -8  -2    9.10    5.44 
  15  -8  -1    9.21    8.18 
  15  -8   0   14.97    8.10 
  15  -8   1  -10.76    8.25 
  15  -8   2    2.75    5.88 
  15  -8   3    3.02    5.62 
  15  -8   4   14.43    9.62 
  15  -8   5  -10.77    8.13 
  15   9 -11  -11.93    8.59 
  15   9 -10  -13.99    9.65 
  15   9  -9  -10.49    8.17 
  15   9  -8   -2.29    4.78 
  15   9  -7   25.72   14.64 
  15   9  -6    5.41    6.70 
  15   9  -5   -0.17    4.73 
  15  -9  -3   -4.65    6.69 
  15  -9  -2   -0.22    4.88 
  15  -9  -1    4.52    4.57 
  15  -9   0   10.03    9.54 
  15  -9   1    9.31    8.67 
  15  -9   2  -13.92   13.07 
  15  -9   3   -1.95    4.24 
  16   0 -22  -13.46    9.47 
  16   0 -21   18.07    9.70 
  16   0 -20   -5.55    5.08 
  16   0 -19   -9.74    8.09 
  16   0 -18   -2.19    3.28 
  16   0 -17   -8.46    7.70 
  16   0 -16   -2.87    3.92 
  16   0 -15    6.45    7.58 
  16   0 -14    6.36    5.80 
  16   0 -13   -1.30    4.62 
  16   0 -12    1.15    3.07 
  16   0 -11   -0.54    3.25 
  16   0 -10    4.15    6.16 
  16   0  -9    3.43    3.21 
  16   0  -8   17.74    7.67 
  16   0  -7   -4.66    4.56 
  16   0  -5    0.64    3.48 
  16   0  -4    9.52    6.73 
  16   0  -3    1.14    5.19 
  16   0  -2    2.17    4.41 
  16   0  -1   -4.05    4.85 
  16   0   0   -2.87    4.27 
  16   0   1   -3.63    3.43 
  16   0   2   -0.89    4.39 
  16   0   3   -3.53    3.88 
  16   0   4   -1.47    5.17 
  16   0   5    4.90    4.08 
  16   0   6    0.98    6.45 
  16   0   7  -14.57   10.91 
  16   0   8   26.11   17.35 
  16   0   9  -14.32   12.25 
  16   0  10    1.59    5.59 
  16  -1 -22  -29.70   15.25 
  16   1 -21   -7.73    7.40 
  16  -1 -21    3.59    5.45 
  16  -1 -20   -2.25    9.53 
  16   1 -20   -7.53    8.57 
  16  -1 -19    0.96    4.92 
  16   1 -19   -7.57    3.89 
  16  -1 -18    9.48    9.61 
  16   1 -18    5.86    7.99 
  16  -1 -17   -1.46    3.38 
  16   1 -17    9.97    8.20 
  16  -1 -16   -0.32    2.94 
  16   1 -16   -9.21    8.19 
  16  -1 -15   10.16    7.29 
  16   1 -15    3.53    7.21 
  16  -1 -14   -3.11    2.43 
  16   1 -14   -2.66    4.86 
  16   1 -13   26.94    9.99 
  16  -1 -13   20.80    9.61 
  16  -1 -12    2.88    5.61 
  16   1 -12   -0.80    3.91 
  16  -1 -11    2.34    3.33 
  16   1 -11    2.78    4.33 
  16   1 -10    3.19    5.40 
  16  -1 -10   -0.05    2.31 
  16  -1  -9    3.17    2.95 
  16   1  -9    8.77    6.65 
  16  -1  -8    2.85    4.44 
  16   1  -8   14.10    7.10 
  16  -1  -7   -5.99    5.00 
  16  -1  -6   23.33    9.11 
  16  -1  -5   60.25   15.63 
  16  -1  -4    9.02    6.71 
  16   1  -4    5.89    7.24 
  16  -1  -3    5.49    6.15 
  16   1  -3   -4.05    5.37 
  16  -1  -2   -7.55    7.04 
  16   1  -2    9.44    6.67 
  16  -1  -1   -1.60    6.22 
  16   1  -1   -1.59    4.78 
  16  -1   0   -1.71    2.93 
  16   1   0    0.17    4.62 
  16  -1   1    0.97    2.89 
  16   1   1    9.05    7.63 
  16  -1   2   -4.67    3.51 
  16   1   2    6.43    4.70 
  16  -1   3   10.34    8.54 
  16   1   3    6.64    3.43 
  16  -1   4    5.38    3.74 
  16   1   4   -7.47    6.57 
  16  -1   5   -0.91    4.81 
  16   1   5   -7.25    9.09 
  16  -1   6    4.66    6.67 
  16   1   6    2.41    6.08 
  16  -1   7    8.65    7.45 
  16   1   7   -9.56    8.79 
  16  -1   8   -6.58    7.30 
  16   1   8  -14.04   13.24 
  16  -1   9   -9.11    8.18 
  16   1   9    6.14   10.32 
  16  -1  10  -20.26   13.29 
  16   1  10    1.90    5.95 
  16   1  11    3.15    3.77 
  16  -2 -23  -17.63    8.48 
  16  -2 -22  -14.88   10.45 
  16   2 -21  -14.59    9.76 
  16  -2 -21   -0.04    5.08 
  16   2 -20  -13.58   10.35 
  16  -2 -20   -2.85    4.89 
  16   2 -19    1.34    7.25 
  16  -2 -19   18.19    9.56 
  16  -2 -18   20.34    9.71 
  16   2 -18   22.84   10.65 
  16  -2 -17   13.65    6.94 
  16   2 -17  -15.56   10.30 
  16  -2 -16   15.40    6.41 
  16   2 -16    3.53    3.29 
  16  -2 -15   -2.24    5.49 
  16   2 -15    9.31    8.19 
  16   2 -14   12.70    6.68 
  16  -2 -14   10.47    4.62 
  16   2 -13    3.50    5.76 
  16  -2 -13    0.42    2.78 
  16   2 -12   -2.19    3.74 
  16  -2 -12    8.36    6.13 
  16  -2 -11   -0.03    3.96 
  16   2 -11    2.85    3.69 
  16  -2 -10    4.85    3.73 
  16   2 -10    2.32    4.18 
  16   2  -9   -1.37    2.71 
  16  -2  -9    0.12    2.51 
  16  -2  -8    2.07    1.96 
  16   2  -8   -1.88    4.20 
  16  -2  -7    5.41    5.49 
  16  -2  -7   -2.09    3.23 
  16  -2  -6   20.28    8.41 
  16  -2  -6    7.16    4.91 
  16  -2  -5    0.03    3.64 
  16  -2  -4    3.93    3.22 
  16  -2  -3   -1.41    2.48 
  16  -2  -2    4.30    4.15 
  16   2  -2    5.29    4.17 
  16  -2  -1   -1.74    4.13 
  16   2  -1   -4.44    6.69 
  16  -2   0   -3.02    6.48 
  16   2   0   22.93   11.54 
  16  -2   1    0.68    5.85 
  16   2   1    0.84    5.80 
  16  -2   2   15.64    8.56 
  16   2   2   19.24   10.05 
  16  -2   3    3.06    2.85 
  16   2   3   -3.47    5.46 
  16  -2   4    3.71    5.87 
  16   2   4   17.04   10.98 
  16  -2   5   -1.73    6.22 
  16   2   5   -3.81    6.71 
  16  -2   6   -9.13    7.64 
  16   2   6    1.87    3.27 
  16  -2   7   -4.42    7.60 
  16   2   7   -0.08    2.95 
  16  -2   8   -2.07    7.54 
  16   2   8    3.67    4.19 
  16  -2   9   10.17    6.94 
  16   2   9    9.90   11.37 
  16  -2  10   -2.70    6.09 
  16   2  10    4.63   10.18 
  16   2  11   -0.10    4.18 
  16  -3 -21   -6.71    5.99 
  16   3 -20   -2.35    8.60 
  16  -3 -20   18.60   10.68 
  16   3 -19    7.29    7.14 
  16  -3 -19   -7.79    6.34 
  16   3 -18   -2.24    4.30 
  16  -3 -18    7.93    7.51 
  16   3 -17   -1.57    5.95 
  16  -3 -17   -3.95    7.38 
  16  -3 -16    8.24    5.54 
  16   3 -16   10.62   11.36 
  16  -3 -15   -2.62    2.92 
  16   3 -15    4.65    4.83 
  16   3 -14   13.39    6.91 
  16  -3 -14   17.95    7.71 
  16  -3 -13   14.91    6.01 
  16   3 -13   19.49    9.86 
  16  -3 -12   -3.29    4.08 
  16   3 -12    3.73    3.69 
  16  -3 -11   -0.58    4.27 
  16   3 -11    5.12    4.87 
  16   3 -10    2.67    5.54 
  16  -3 -10    2.72    3.20 
  16   3  -9    0.68    5.84 
  16  -3  -9   -1.47    3.26 
  16   3  -8    8.35    6.61 
  16  -3  -8   11.34    5.10 
  16  -3  -8    8.75    5.37 
  16  -3  -7   18.53    6.62 
  16  -3  -7   15.80    8.89 
  16  -3  -6   -5.11    5.50 
  16  -3  -6    3.51    3.01 
  16  -3  -5   -0.31    2.80 
  16  -3  -5   -1.50    2.97 
  16  -3  -4   -1.00    2.27 
  16  -3  -3    0.37    3.32 
  16  -3  -2    7.86    4.28 
  16  -3  -1    1.77    2.70 
  16  -3   0    3.73    5.63 
  16   3   0    2.94    5.40 
  16  -3   1   -6.94    7.98 
  16   3   1   -9.02    7.59 
  16  -3   2    0.47    6.08 
  16   3   2    0.38    4.07 
  16  -3   3    6.98    5.45 
  16   3   3   15.66   11.03 
  16  -3   4    3.29    5.69 
  16   3   4    1.86    6.37 
  16  -3   5   13.57   11.50 
  16   3   5   -8.09    5.39 
  16  -3   6  -15.68    9.90 
  16   3   6   -3.35    7.44 
  16  -3   7    8.74    5.48 
  16   3   7   -8.04    7.80 
  16  -3   8    7.08    5.21 
  16   3   8   -9.16    5.34 
  16  -3   9    5.63    3.38 
  16   3   9  -16.13   12.50 
  16   3  10   20.75    9.18 
  16   3  11  -28.02   17.73 
  16   4 -19   -2.03    8.11 
  16   4 -18    3.19    7.73 
  16  -4 -18  -11.35    5.98 
  16   4 -17  -14.99   11.94 
  16  -4 -17    7.36    6.96 
  16   4 -16   17.67    9.82 
  16  -4 -16    2.09    5.90 
  16   4 -15   18.15    9.54 
  16  -4 -15   -6.80    6.32 
  16  -4 -14   11.73    5.68 
  16   4 -14   20.07   10.66 
  16  -4 -13    2.09    2.82 
  16   4 -13    6.45    8.61 
  16  -4 -12    3.39    1.88 
  16   4 -12    9.68    9.37 
  16   4 -11    1.70    3.51 
  16  -4 -11    5.69    4.53 
  16   4 -10  -11.38    7.99 
  16  -4 -10    1.96    2.76 
  16   4  -9   -1.25    3.77 
  16  -4  -9    0.22    3.82 
  16  -4  -9   -1.23    3.16 
  16   4  -8   10.24    7.66 
  16  -4  -8    5.35    2.87 
  16  -4  -8   12.82    6.09 
  16  -4  -7    8.90    5.07 
  16  -4  -7    7.57    2.94 
  16  -4  -6   -2.69    3.40 
  16  -4  -6    4.55    3.70 
  16  -4  -5   -1.59    3.41 
  16  -4  -5    5.19    3.36 
  16  -4  -4   11.98    6.16 
  16  -4  -4   -1.56    4.71 
  16  -4  -3   -6.58    4.13 
  16  -4  -2   -1.80    2.50 
  16  -4  -1    4.84    5.08 
  16  -4   0   -4.75    4.83 
  16  -4   1   -4.66    6.73 
  16  -4   2   -2.16    4.58 
  16  -4   3   -4.11    8.43 
  16   4   3  -10.52   10.60 
  16  -4   4   10.35    7.39 
  16   4   4    5.50    7.76 
  16  -4   5   -5.63    7.33 
  16   4   5    3.95    6.74 
  16  -4   6   -1.14    5.19 
  16   4   6   -0.11    9.27 
  16  -4   7    4.21    7.72 
  16   4   7   10.90    9.51 
  16  -4   8   -8.15    4.11 
  16   4   8   -3.69    6.96 
  16   4   9   -2.06    5.00 
  16   4  10  -15.01   14.73 
  16   5 -18    2.15    6.72 
  16   5 -17  -14.18   11.78 
  16   5 -16    7.94    8.57 
  16   5 -15   -7.12    7.34 
  16   5 -14  -11.74    7.89 
  16   5 -13   10.38    7.14 
  16   5 -12    2.26    7.20 
  16   5 -11   -3.49    6.00 
  16   5 -10    2.66    8.05 
  16  -5  -9    2.68    2.03 
  16   5  -9   -1.99    5.81 
  16  -5  -8   -2.11    3.90 
  16   5  -8   -3.47    6.80 
  16  -5  -7   -7.19    7.03 
  16   5  -7    4.67    6.57 
  16  -5  -6    3.67    3.75 
  16  -5  -5   -0.37    2.58 
  16  -5  -4    4.80    4.68 
  16  -5  -3    4.93    5.33 
  16  -5  -2    0.72    3.94 
  16  -5  -1   -6.88    4.64 
  16  -5   0   -5.10    6.56 
  16  -5   1    7.90    4.40 
  16  -5   2   -2.17    3.27 
  16  -5   3   -3.36    5.42 
  16  -5   4    0.23    7.31 
  16  -5   5   -5.85    8.06 
  16  -5   6   -0.86    3.94 
  16  -5   7   -3.43    5.95 
  16   5   8  -13.80   11.43 
  16   5   9   13.58    9.84 
  16   5  10   -3.08    5.77 
  16   6 -16  -19.00    9.97 
  16   6 -15  -16.62   10.79 
  16   6 -14   -9.29    6.53 
  16   6 -13   -2.05    5.95 
  16   6 -12  -11.80   10.81 
  16   6 -11   -3.22    4.01 
  16   6 -10   -1.51    6.09 
  16  -6  -9   -9.01    6.30 
  16   6  -9   10.15    7.54 
  16  -6  -8   -4.57    4.63 
  16   6  -8    1.17    4.53 
  16  -6  -7    1.47    4.84 
  16   6  -7    1.64    3.81 
  16  -6  -6    0.48    5.17 
  16  -6  -5   -2.76    5.03 
  16  -6  -4    3.31    3.75 
  16  -6  -3    1.36    5.04 
  16  -6  -2   -5.84    7.21 
  16  -6  -1    0.52    4.38 
  16  -6   0    3.41    6.80 
  16  -6   1   -5.91    6.88 
  16  -6   2   -5.96   10.24 
  16  -6   3   16.87   13.27 
  16  -6   4   11.17    9.58 
  16  -6   5    9.72   11.27 
  16  -6   6   -5.12    8.23 
  16   7 -15    5.07    6.70 
  16   7 -14    3.61    7.50 
  16   7 -13    2.20    4.93 
  16   7 -12   -1.37    3.14 
  16   7 -11    6.62    5.45 
  16   7 -10   -2.29    6.17 
  16   7  -9   -5.19    9.18 
  16   7  -8   -1.71    7.31 
  16   7  -7    1.34    5.42 
  16  -7  -7   -3.07    5.74 
  16  -7  -6    5.52    5.72 
  16   7  -6   -1.30    4.57 
  16  -7  -5    7.27    3.39 
  16  -7  -4    5.97    6.32 
  16  -7  -3   -3.18    6.41 
  16  -7  -2   -3.12    6.21 
  16  -7  -1   11.15    5.15 
  16  -7   0    0.17    5.47 
  16  -7   1  -12.49    9.00 
  16  -7   2  -12.82   10.13 
  16  -7   3   15.63   10.25 
  16  -7   4    7.18   10.91 
  16  -7   5   -6.09    4.49 
  16   8 -12   -4.42    6.34 
  16   8 -11    1.95    4.75 
  16   8 -10    3.86    6.48 
  16   8  -9    2.37    8.02 
  16   8  -8    4.96    5.25 
  16   8  -7    1.21    4.42 
  16   8  -6   -8.40    9.44 
  16  -8  -5   10.14    7.45 
  16  -8  -4    4.17    4.07 
  16  -8  -3   -0.60    2.46 
  16  -8  -2   -9.92    7.21 
  16  -8  -1  -26.20   13.57 
  16  -8   0  -13.23    9.74 
  16  -8   1   -0.75    7.56 
  16  -8   2   -1.64    5.43 
  16  -8   3   -8.69    8.19 
  16  -8   4   -9.71    8.75 
  16   9  -7    8.93    9.88 
  16   9  -6    8.60    7.24 
  16   9  -5    4.84    4.96 
  16  -9  -2   -3.53    7.34 
  16  -9  -1  -13.70   10.04 
  16  -9   0   -5.30    4.68 
  16  -9   1  -21.83   13.97 
  16  -9   2  -32.75   17.10 
  17   0 -22   -1.76    6.63 
  17   0 -21    1.53    5.50 
  17   0 -20    1.26    5.59 
  17   0 -19   -4.15    3.96 
  17   0 -18   -3.90    3.72 
  17   0 -17    9.79    6.75 
  17   0 -16   13.58    9.29 
  17   0 -15   -2.35    3.66 
  17   0 -14    5.02    5.85 
  17   0 -13   -8.32    4.10 
  17   0 -12   13.85    8.14 
  17   0 -11    3.91    3.96 
  17   0 -10   -2.17    4.61 
  17   0  -9   -1.64    3.61 
  17   0  -8   29.08   10.08 
  17   0  -7    6.10    5.35 
  17   0  -5    1.19    7.74 
  17   0  -4   -0.28    3.21 
  17   0  -3    1.74    2.98 
  17   0  -2    6.95    5.48 
  17   0  -1   -9.01    9.35 
  17   0   0  -11.72    8.50 
  17   0   1    3.74    5.26 
  17   0   2   -2.57    5.99 
  17   0   3   -6.41    6.09 
  17   0   4    1.59    6.32 
  17   0   5    3.45    3.02 
  17   0   6   -0.06    3.88 
  17   0   7   -4.92    6.68 
  17   0   8   -2.05    9.82 
  17   0   9    3.98    4.87 
  17  -1 -22  -26.32   14.42 
  17   1 -21    7.69    9.11 
  17  -1 -21    2.77    5.79 
  17  -1 -20   17.71   11.13 
  17   1 -20  -27.78   13.39 
  17  -1 -19    2.22    3.74 
  17   1 -19    7.13    7.31 
  17  -1 -18    0.25    2.72 
  17   1 -18   -6.70    8.47 
  17  -1 -17    4.28    4.26 
  17   1 -17    6.29    5.19 
  17  -1 -16    3.66    4.39 
  17   1 -16   -6.69    7.17 
  17  -1 -15   -3.83    3.29 
  17   1 -15    0.09    2.71 
  17   1 -14   -2.42    2.68 
  17  -1 -14    5.99    5.56 
  17   1 -13   10.93    7.53 
  17  -1 -13    0.80    2.68 
  17  -1 -12    1.48    2.60 
  17   1 -12    1.81    3.37 
  17  -1 -11    2.70    4.20 
  17   1 -11   -0.22    4.34 
  17   1 -10   12.65    6.15 
  17  -1 -10   11.75    7.14 
  17  -1  -9   -0.96    2.78 
  17   1  -9   -4.48    6.58 
  17   1  -8   12.13    6.36 
  17  -1  -8   -1.52    3.80 
  17  -1  -7    4.96    4.89 
  17  -1  -6    6.58    5.81 
  17  -1  -5   15.52    8.41 
  17  -1  -4   -0.09    5.23 
  17   1  -4    2.83    4.48 
  17  -1  -3   -3.87    5.55 
  17   1  -3    8.02    5.55 
  17  -1  -2   -2.30    4.14 
  17   1  -2   -3.59    7.03 
  17  -1  -1    7.23    7.30 
  17   1  -1    4.90    4.80 
  17  -1   0   -0.91    3.83 
  17   1   0   -0.71    2.97 
  17  -1   1    3.22    2.89 
  17   1   1    1.81    3.15 
  17  -1   2   13.62    9.11 
  17   1   2   -0.88    5.34 
  17  -1   3   -5.72   10.10 
  17   1   3   -4.43    6.16 
  17  -1   4   -0.32    5.01 
  17   1   4   -5.45    3.50 
  17  -1   5   -7.37    8.73 
  17   1   5    9.86    5.95 
  17  -1   6   -6.38    8.02 
  17   1   6   -4.04    6.90 
  17  -1   7    2.83    4.10 
  17   1   7    7.14    8.04 
  17  -1   8  -10.31   10.28 
  17   1   8   16.68    6.02 
  17  -1   9    5.14   10.88 
  17   1   9   -8.18    8.42 
  17  -2 -22    0.36    7.55 
  17  -2 -21  -21.54   11.33 
  17   2 -20    7.55    5.03 
  17  -2 -20    0.17    4.62 
  17  -2 -19    0.54    3.22 
  17   2 -19   -4.86    7.03 
  17  -2 -18   -0.37    3.86 
  17   2 -18    4.73    7.77 
  17  -2 -17   -0.15    3.71 
  17   2 -17    6.52    6.30 
  17  -2 -16    0.93    4.22 
  17   2 -16   -0.67    8.23 
  17  -2 -15   11.11    6.88 
  17   2 -15   -3.62    7.07 
  17   2 -14   12.74    7.56 
  17  -2 -14   -3.83    4.43 
  17   2 -13   11.32    6.69 
  17  -2 -13    1.26    2.45 
  17   2 -12   -2.30    5.58 
  17  -2 -12   14.76    6.97 
  17   2 -11   -2.13    3.22 
  17  -2 -11   -0.55    3.50 
  17  -2 -10    0.36    3.76 
  17   2 -10    8.33    6.53 
  17   2  -9   -2.26    5.35 
  17  -2  -9   -4.66    2.70 
  17  -2  -8    9.48    4.23 
  17   2  -8    4.77    5.73 
  17  -2  -7    8.31    5.70 
  17  -2  -7   -1.30    3.06 
  17  -2  -6   -2.70    4.23 
  17  -2  -6    3.15    3.61 
  17  -2  -5    2.61    4.38 
  17  -2  -4   -2.65    6.55 
  17  -2  -3    0.69    2.85 
  17  -2  -2   12.57    8.56 
  17   2  -2    4.98    4.39 
  17  -2  -1    0.02    5.97 
  17   2  -1   -3.00    5.46 
  17  -2   0    2.85    8.51 
  17   2   0  -10.24    9.43 
  17  -2   1   -2.54    4.00 
  17   2   1   -7.60    5.02 
  17  -2   2   -8.40    8.72 
  17   2   2    7.23    7.05 
  17  -2   3   -5.73    6.36 
  17   2   3   -1.05    6.70 
  17  -2   4  -13.04   10.18 
  17   2   4    4.80    8.59 
  17  -2   5   13.23    9.47 
  17   2   5   11.92    8.76 
  17  -2   6   -1.61    6.77 
  17   2   6   -5.71    6.52 
  17  -2   7   -3.34    5.30 
  17   2   7   12.62    8.40 
  17  -2   8    5.82    9.72 
  17   2   8    3.55    7.83 
  17   2   9   20.31   14.99 
  17  -3 -21   15.24   11.48 
  17  -3 -20   11.05    9.16 
  17   3 -19    8.42   11.09 
  17  -3 -19    1.25    5.43 
  17   3 -18   -6.96    8.97 
  17  -3 -18   10.30    5.82 
  17  -3 -17   13.35    5.81 
  17   3 -17   -5.66    8.11 
  17  -3 -16   -4.00    5.15 
  17   3 -16   -7.79    8.56 
  17   3 -15   -1.49    5.08 
  17  -3 -15  -10.37    3.32 
  17   3 -14    6.13    6.70 
  17  -3 -14    7.90    5.42 
  17  -3 -13   -3.10    2.61 
  17   3 -13    2.69    3.85 
  17  -3 -12    3.64    4.28 
  17   3 -12    5.58    5.48 
  17   3 -11    2.87    3.25 
  17  -3 -11   10.83    6.18 
  17   3 -10   -7.43    6.80 
  17  -3 -10    1.37    2.89 
  17  -3  -9    5.35    3.95 
  17   3  -9    1.97    2.95 
  17  -3  -8   -8.13    5.86 
  17  -3  -8   -4.56    2.41 
  17   3  -8   -7.91    7.46 
  17  -3  -7    2.16    2.35 
  17  -3  -7   -5.32    4.23 
  17  -3  -6   -3.53    3.52 
  17  -3  -6    6.22    4.77 
  17  -3  -5    0.06    4.90 
  17  -3  -5   -1.13    1.83 
  17  -3  -4    7.25    5.12 
  17  -3  -3    5.77    5.46 
  17  -3  -2   -9.90    7.76 
  17  -3  -1    2.88    4.31 
  17  -3   0   13.07    8.92 
  17   3   0   -9.63    9.79 
  17  -3   1   -2.99    6.89 
  17   3   1    9.30    8.14 
  17  -3   2   -1.21    3.63 
  17   3   2   19.19    9.83 
  17  -3   3    9.67    8.12 
  17   3   3   -2.85    5.54 
  17  -3   4   14.35   10.34 
  17   3   4    4.14    7.21 
  17  -3   5   -1.01    4.62 
  17   3   5   14.17    9.85 
  17  -3   6    6.92    3.56 
  17   3   6   -7.61    6.86 
  17  -3   7    1.31   10.17 
  17   3   7   11.19   11.48 
  17  -3   8   -3.50    3.32 
  17   3   8   11.35    4.85 
  17   3   9   -4.15    5.64 
  17   4 -18   -0.07    5.14 
  17   4 -17  -19.96   13.99 
  17   4 -16    3.52    6.70 
  17  -4 -16   15.01    9.29 
  17   4 -15    8.00    7.22 
  17  -4 -15    2.42    6.13 
  17  -4 -14   11.84    6.54 
  17   4 -14   14.18   10.16 
  17  -4 -13   -4.43    5.24 
  17   4 -13    0.23    6.12 
  17  -4 -12    2.32    3.16 
  17   4 -12    4.87    6.36 
  17   4 -11   -2.21    3.37 
  17  -4 -11   -4.67    4.82 
  17   4 -10   -8.64    7.02 
  17  -4 -10    1.18    4.31 
  17   4  -9   -0.70    2.57 
  17  -4  -9    5.07    4.89 
  17  -4  -9   -3.44    5.02 
  17  -4  -8    4.43    1.82 
  17  -4  -8   -4.91    3.12 
  17   4  -8   -2.40    4.68 
  17  -4  -7    0.18    3.56 
  17  -4  -7    8.45    4.45 
  17  -4  -6    2.99    2.67 
  17  -4  -6    2.73    1.84 
  17  -4  -5   -7.84    7.05 
  17  -4  -5    5.29    3.59 
  17  -4  -4    6.59    4.93 
  17  -4  -4    6.72    4.77 
  17  -4  -3   -6.24    5.38 
  17  -4  -2   -4.24    6.18 
  17  -4  -1    9.23    7.65 
  17  -4   0   -2.61    3.97 
  17  -4   1   -1.78    7.02 
  17  -4   2    0.93    6.04 
  17  -4   3    2.18    4.64 
  17   4   3   -9.74   10.24 
  17  -4   4   -0.30    3.94 
  17   4   4  -12.99   10.57 
  17  -4   5   -6.54   10.93 
  17   4   5    4.76    5.12 
  17  -4   6   -4.05    9.07 
  17   4   6   -8.09    8.74 
  17  -4   7   -2.23    3.92 
  17   4   7   18.00    5.74 
  17   4   8   -6.12    7.09 
  17   5 -17  -14.40   12.10 
  17   5 -16   -6.37    3.75 
  17   5 -15  -10.51    8.84 
  17   5 -14   -5.24    5.92 
  17   5 -13    7.00    8.61 
  17   5 -12    6.34    9.08 
  17   5 -11    2.33    4.35 
  17   5 -10    0.36    4.25 
  17   5  -9    4.17    5.87 
  17  -5  -9   -3.59    5.05 
  17   5  -8    7.38    8.17 
  17  -5  -8    0.05    3.73 
  17   5  -7   10.24    9.02 
  17  -5  -7    3.66    4.09 
  17  -5  -6   -1.54    3.95 
  17  -5  -5   -0.87    3.63 
  17  -5  -4   -3.51    3.82 
  17  -5  -3   -2.38    5.68 
  17  -5  -2   -2.16    3.50 
  17  -5  -1   -4.03    5.28 
  17  -5   0   -9.28    8.28 
  17  -5   1   -8.25    8.57 
  17  -5   2   -6.97    6.50 
  17  -5   3    0.10    4.59 
  17  -5   4   10.36    5.83 
  17  -5   5   17.29   11.69 
  17  -5   6  -19.21   10.72 
  17   6 -15  -14.53    9.17 
  17   6 -14   10.06   10.21 
  17   6 -13   -5.52    7.27 
  17   6 -12   -3.24    4.63 
  17   6 -11    3.00    4.40 
  17   6 -10   -7.55    3.47 
  17  -6  -9   -6.62    5.50 
  17   6  -9   13.95    9.71 
  17  -6  -8   -9.63    7.43 
  17   6  -8   17.27   12.28 
  17  -6  -7    9.63    6.65 
  17   6  -7    4.47    6.14 
  17  -6  -6   -7.44    6.06 
  17  -6  -5   -4.62    3.67 
  17  -6  -4   -3.39    4.88 
  17  -6  -3    4.58    5.53 
  17  -6  -2   -9.85    7.06 
  17  -6  -1    7.64    5.28 
  17  -6   0   15.38    7.18 
  17  -6   1   -3.96    7.52 
  17  -6   2   -6.04    7.29 
  17  -6   3    6.33    7.39 
  17  -6   4    2.20    7.91 
  17  -6   5   10.23   12.87 
  17   7 -13   -3.69    6.81 
  17   7 -12  -22.62   11.44 
  17   7 -11    4.61    6.54 
  17   7 -10  -17.38    9.67 
  17   7  -9    2.84    6.95 
  17   7  -8   -9.54    8.99 
  17  -7  -7    4.53    4.83 
  17   7  -7  -10.53    9.16 
  17  -7  -6    3.04    5.42 
  17   7  -6  -20.48   12.16 
  17  -7  -5   -3.51    4.50 
  17  -7  -4  -12.20    7.21 
  17  -7  -3   -5.23    5.86 
  17  -7  -2   -7.56    4.52 
  17  -7  -1    4.67    5.86 
  17  -7   0   -5.88    8.82 
  17  -7   1   17.84   10.82 
  17  -7   2    7.21    6.50 
  17  -7   3    3.93    6.28 
  17  -7   4   21.25   13.06 
  17   8 -10   -2.32    4.49 
  17   8  -9  -10.31    3.75 
  17   8  -8    0.74    6.99 
  17   8  -7   19.28   10.43 
  17   8  -6   11.54    5.81 
  17  -8  -4   -0.05    3.72 
  17  -8  -3   -8.97    5.22 
  17  -8  -2  -12.08    7.63 
  17  -8  -1  -13.12    9.64 
  17  -8   0  -18.49   12.77 
  17  -8   1    0.93    6.05 
  17  -8   2  -29.33   13.64 
  17  -9  -1  -15.85   11.01 
  18   0 -21   -5.09    8.35 
  18   0 -20    9.68    8.83 
  18   0 -19  -13.44    9.82 
  18   0 -18   -0.25    3.77 
  18   0 -17   -0.17    5.74 
  18   0 -16    5.94    6.79 
  18   0 -15    1.28    5.45 
  18   0 -14   -0.44    4.35 
  18   0 -13    7.30    5.01 
  18   0 -12    3.74    5.48 
  18   0 -11    4.88    6.09 
  18   0 -10   -3.57    6.71 
  18   0  -9   -0.95    3.99 
  18   0  -8    0.41    4.09 
  18   0  -7    5.89    6.37 
  18   0  -5   -1.81    5.83 
  18   0  -4   -0.33    4.21 
  18   0  -3   11.93    7.74 
  18   0  -2    1.02    5.33 
  18   0  -1    4.24    7.00 
  18   0   0    4.77    8.74 
  18   0   1    3.07    3.71 
  18   0   2   -2.74    6.38 
  18   0   3   -4.59    4.66 
  18   0   4   14.64    6.04 
  18   0   5   -2.42    6.17 
  18   0   6  -13.58    9.15 
  18   0   7   -6.39    6.31 
  18  -1 -22   -1.51    9.26 
  18  -1 -21    0.47    7.22 
  18  -1 -20   -2.61    4.30 
  18   1 -20  -25.22   11.75 
  18  -1 -19   15.72   11.41 
  18   1 -19  -11.99    7.93 
  18  -1 -18    1.34    5.51 
  18   1 -18   -2.20    9.11 
  18  -1 -17   -3.31    3.70 
  18   1 -17    1.46    4.78 
  18  -1 -16  -10.43    7.33 
  18   1 -16  -15.13    9.92 
  18  -1 -15  -16.54   11.04 
  18   1 -15    5.47    5.50 
  18   1 -14    9.13    6.29 
  18  -1 -14   14.04    8.77 
  18   1 -13  -11.12    7.13 
  18  -1 -13  -13.39    8.38 
  18  -1 -12    4.58    5.37 
  18   1 -12  -12.08    8.26 
  18  -1 -11   -0.52    4.76 
  18   1 -11   -2.27    5.04 
  18   1 -10    0.15    2.58 
  18  -1 -10   -2.04    4.24 
  18   1  -9    2.70    5.04 
  18  -1  -9   -1.43    2.22 
  18   1  -8    2.61    3.72 
  18  -1  -8    5.91    4.28 
  18  -1  -7    2.25    4.12 
  18  -1  -6    8.48    7.00 
  18  -1  -5   15.68    7.80 
  18  -1  -4   -9.75    6.92 
  18   1  -4    2.61    3.96 
  18  -1  -3    3.83    2.64 
  18   1  -3   11.17    9.46 
  18  -1  -2   11.62    9.57 
  18   1  -2    4.39    7.33 
  18  -1  -1    6.53    5.88 
  18   1  -1    5.64    6.99 
  18  -1   0    4.26    4.84 
  18   1   0   -8.24    8.34 
  18  -1   1    2.38    5.53 
  18   1   1    3.72    3.42 
  18  -1   2    6.94    8.76 
  18   1   2    4.82    6.47 
  18  -1   3   -4.42    9.15 
  18   1   3    8.67    8.65 
  18  -1   4   -5.13    6.92 
  18   1   4  -12.03   10.19 
  18  -1   5   -0.02    7.38 
  18   1   5  -19.54   11.92 
  18  -1   6   -1.81    6.51 
  18   1   6   -2.58    4.70 
  18  -1   7    4.02    9.37 
  18   1   7   -7.50    8.19 
  18   1   8   -9.25   11.37 
  18  -2 -22   15.12   10.29 
  18  -2 -21  -15.94    8.20 
  18   2 -20    5.40    4.16 
  18  -2 -20   -4.76    7.63 
  18  -2 -19   -1.58    7.46 
  18   2 -19   -0.02    7.34 
  18  -2 -18   10.47    5.02 
  18   2 -18    9.47    8.13 
  18  -2 -17  -14.42   10.13 
  18   2 -17   -7.53    8.34 
  18  -2 -16   13.33    6.27 
  18   2 -16    2.57    4.49 
  18   2 -15    4.44    3.37 
  18  -2 -15   -4.70    3.37 
  18   2 -14    5.65    6.19 
  18  -2 -14   -0.10    3.98 
  18   2 -13   -0.54    3.06 
  18  -2 -13   -7.13    6.83 
  18   2 -12    7.33    7.08 
  18  -2 -12   -3.05    3.36 
  18   2 -11    6.85    3.44 
  18  -2 -11   -0.35    2.52 
  18  -2 -10   -0.43    4.46 
  18   2 -10    4.67    4.18 
  18   2  -9   -4.29    4.48 
  18  -2  -9   -0.41    4.30 
  18  -2  -8    1.10    3.09 
  18   2  -8   -4.19    5.46 
  18  -2  -7    7.82    6.60 
  18  -2  -7    6.78    5.70 
  18  -2  -6    1.64    3.52 
  18  -2  -6    2.31    4.97 
  18  -2  -5   -0.67    4.07 
  18  -2  -4   -6.40    6.54 
  18  -2  -3   10.92    8.84 
  18  -2  -2   -2.86    5.48 
  18   2  -2   13.22    9.01 
  18  -2  -1   -2.17    3.96 
  18   2  -1    0.12    5.83 
  18  -2   0   -6.37    6.69 
  18   2   0   25.16   13.31 
  18  -2   1   -4.84    5.17 
  18   2   1   12.11    8.57 
  18  -2   2   16.01    8.19 
  18   2   2   15.96    9.80 
  18  -2   3    0.36    4.62 
  18   2   3   -7.10    5.47 
  18  -2   4    8.91    6.61 
  18   2   4   -1.10    7.89 
  18  -2   5    5.89    9.68 
  18   2   5   -7.76    6.08 
  18  -2   6  -12.82   11.31 
  18   2   6    6.09    9.21 
  18  -2   7   27.24   12.75 
  18   2   7    4.84    4.68 
  18  -3 -20    6.50    3.71 
  18   3 -19  -19.27   11.91 
  18  -3 -19   -6.83    7.83 
  18   3 -18  -18.61    9.13 
  18  -3 -18    9.67    4.20 
  18  -3 -17   12.90    4.88 
  18   3 -17   -1.09    5.18 
  18  -3 -16   -6.43    7.44 
  18   3 -16  -16.85   11.41 
  18   3 -15   -1.79    4.04 
  18  -3 -15   27.16   10.87 
  18   3 -14   -2.33    8.06 
  18  -3 -14    0.61    4.41 
  18  -3 -13   12.17    7.35 
  18   3 -13    8.65    8.14 
  18  -3 -12   -3.66    4.09 
  18   3 -12   -2.22    6.94 
  18   3 -11    4.57    4.04 
  18  -3 -11    2.11    4.00 
  18  -3 -10   -1.67    3.21 
  18   3 -10    0.71    5.22 
  18  -3  -9    3.00    3.93 
  18   3  -9    4.39    7.26 
  18   3  -8    7.14    6.60 
  18  -3  -8    0.62    2.80 
  18  -3  -8    4.00    2.74 
  18  -3  -7   24.06    7.09 
  18  -3  -7   21.99    9.47 
  18  -3  -6    5.82    3.87 
  18  -3  -6   13.56    8.25 
  18  -3  -5    0.70    6.65 
  18  -3  -5   -2.67    3.34 
  18  -3  -4    3.10    6.77 
  18  -3  -3  -13.16    8.91 
  18  -3  -2   -4.07    4.41 
  18  -3  -1   -7.89    6.98 
  18  -3   0    8.94    7.45 
  18   3   0    0.02    5.29 
  18  -3   1   -1.19    4.38 
  18   3   1   -5.29    5.08 
  18  -3   2   -5.56    5.57 
  18   3   2   -0.99    8.50 
  18  -3   3   -4.98    3.72 
  18   3   3   13.15    7.12 
  18  -3   4    8.27    5.79 
  18   3   4   -6.14   10.22 
  18  -3   5   -6.71    7.42 
  18   3   5   -2.30    4.16 
  18  -3   6  -15.12   10.54 
  18   3   6   -5.86    7.42 
  18   3   7    7.23    7.21 
  18   4 -18   -6.66    9.59 
  18   4 -17    2.12    7.89 
  18   4 -16   11.49   10.42 
  18   4 -15   -6.94    9.42 
  18   4 -14   -5.54    6.97 
  18   4 -13    5.05    5.79 
  18  -4 -12    9.08    6.69 
  18   4 -12    3.56    6.46 
  18   4 -11    5.97    8.29 
  18  -4 -11   -4.13    4.32 
  18   4 -10    1.83    6.35 
  18  -4 -10    8.06    6.82 
  18  -4  -9   -2.39    5.89 
  18  -4  -9    2.65    2.96 
  18  -4  -8   -3.79    4.13 
  18  -4  -8    3.35    4.60 
  18   4  -8   -8.93    9.37 
  18  -4  -7    2.04    3.83 
  18  -4  -7   -0.39    2.17 
  18  -4  -6    0.53    3.24 
  18  -4  -6   -3.70    4.72 
  18  -4  -5   -3.78    4.83 
  18  -4  -5    4.24    3.22 
  18  -4  -4   -6.83    6.26 
  18  -4  -4   12.75    5.73 
  18  -4  -3   -1.64    5.02 
  18  -4  -2  -11.14    8.50 
  18  -4  -1    2.30    4.12 
  18  -4   0    1.84    5.05 
  18  -4   1    5.44    6.83 
  18  -4   2    3.29    3.64 
  18  -4   3   -7.59   10.22 
  18  -4   4    0.02    4.77 
  18   4   4   -0.47    4.46 
  18  -4   5   -7.53    9.16 
  18   4   5  -23.39   13.54 
  18   4   6  -11.58    9.68 
  18   4   7    0.90    5.82 
  18   5 -16    1.64    6.26 
  18   5 -15  -12.83    7.37 
  18   5 -14   -1.16    4.60 
  18   5 -13   13.84   11.46 
  18   5 -12    0.33    3.48 
  18   5 -11    4.11    5.63 
  18   5 -10   -5.40    7.85 
  18   5  -9    6.04    6.14 
  18  -5  -9   -2.07    3.92 
  18   5  -8  -13.48    8.45 
  18  -5  -8   11.40    6.85 
  18  -5  -7   13.34    7.32 
  18   5  -7   -2.56    3.62 
  18  -5  -6   -5.71    6.96 
  18  -5  -5   -0.46    4.91 
  18  -5  -4    9.25    9.59 
  18  -5  -3   11.43    8.26 
  18  -5  -2    4.58    3.92 
  18  -5  -1   -5.25    7.85 
  18  -5   0    8.33    7.42 
  18  -5   1    5.97    5.81 
  18  -5   2    1.16    7.26 
  18  -5   3    6.65    9.39 
  18  -5   4    9.27    3.51 
  18   6 -14   19.76   13.73 
  18   6 -13   11.48    9.58 
  18   6 -12    7.07    7.76 
  18   6 -11    4.29    3.77 
  18   6 -10   -8.57    2.97 
  18   6  -9   -1.48    4.53 
  18  -6  -9    8.78    7.81 
  18  -6  -8    1.23    4.56 
  18   6  -8   12.41    8.57 
  18  -6  -7    1.89    4.86 
  18   6  -7   13.14    8.95 
  18  -6  -6    9.51    6.64 
  18  -6  -5   -0.97    2.82 
  18  -6  -4    9.05    3.00 
  18  -6  -3   -4.47    6.19 
  18  -6  -2   -5.29    5.21 
  18  -6  -1   -7.36   10.36 
  18  -6   0   11.07    8.38 
  18  -6   1    2.64    6.68 
  18  -6   2   -4.89    4.53 
  18  -6   3   -4.01    9.70 
  18   7 -11   -5.55    9.34 
  18   7 -10   -2.70    7.25 
  18   7  -9    0.51    8.20 
  18   7  -8   -3.01    7.73 
  18   7  -7    3.78    3.99 
  18  -7  -6   -6.46    5.16 
  18   7  -6    4.98    6.80 
  18  -7  -5  -16.26    6.92 
  18  -7  -4    5.03    3.08 
  18  -7  -3    9.27    4.85 
  18  -7  -2   -6.09    5.31 
  18  -7  -1    1.96    6.78 
  18  -7   0   -2.21    5.59 
  18  -7   1  -14.16   11.57 
  18  -7   2   -9.31    6.43 
  18  -8  -4   22.59   10.21 
  18  -8  -3  -11.32    9.45 
  18  -8  -2  -15.39    9.43 
  18  -8  -1   20.18   13.03 
  18  -8   0  -16.07   11.40 
  18  -8   1    6.88   10.42 
  19   0 -20    4.17    7.78 
  19   0 -19   -7.49    8.30 
  19   0 -18  -18.51   10.46 
  19   0 -17  -13.53    9.20 
  19   0 -16   -7.48    8.11 
  19   0 -15  -10.71    6.73 
  19   0 -14    4.94    5.99 
  19   0 -13  -10.54    8.63 
  19   0 -12    5.61    8.10 
  19   0 -11    8.44    6.67 
  19   0 -10    1.07    3.34 
  19   0  -9   -5.86    6.88 
  19   0  -8   -1.70    2.76 
  19   0  -7   -1.90    4.08 
  19   0  -5    4.73    6.01 
  19   0  -4    4.05    6.50 
  19   0  -3   -5.82    6.58 
  19   0  -2   -2.57    9.89 
  19   0  -1   10.29   10.20 
  19   0   0   -1.26    2.81 
  19   0   1   -7.59   12.13 
  19   0   2  -15.19   10.63 
  19   0   3    2.24    4.65 
  19   0   4   -5.13    6.98 
  19   0   5    0.71    5.68 
  19   0   6   -6.30    7.38 
  19  -1 -21  -11.37   10.60 
  19  -1 -20   10.27   11.32 
  19   1 -20   -8.92    8.78 
  19  -1 -19   -1.21    5.41 
  19   1 -19    9.66   10.77 
  19  -1 -18   -7.91    5.63 
  19   1 -18    8.64    9.15 
  19  -1 -17   -2.58    4.92 
  19   1 -17   -9.72    8.04 
  19  -1 -16   -5.49    5.57 
  19   1 -16   -6.55    7.51 
  19  -1 -15    4.44    5.88 
  19   1 -15    4.39    4.74 
  19   1 -14   -0.14    5.06 
  19  -1 -14   -2.05    4.97 
  19  -1 -13   11.38    5.74 
  19   1 -13   10.63    6.10 
  19  -1 -12   -5.14    5.32 
  19   1 -12    7.53    5.44 
  19   1 -11    4.23    5.86 
  19  -1 -11    3.02    2.86 
  19   1 -10    4.81    5.59 
  19  -1 -10    8.93    5.88 
  19   1  -9    1.91    4.46 
  19  -1  -9    5.62    2.38 
  19  -1  -8   -3.09    2.56 
  19   1  -8   -3.68    4.18 
  19  -1  -7   14.46    7.39 
  19  -1  -6    0.53    6.90 
  19  -1  -5  -10.21    7.35 
  19  -1  -4   -9.03    3.85 
  19   1  -4    2.46    4.00 
  19  -1  -3   10.63    7.60 
  19   1  -3   -0.46    5.30 
  19  -1  -2   -0.46    4.19 
  19   1  -2    5.09    7.74 
  19  -1  -1    1.24    5.43 
  19   1  -1   -6.61    3.58 
  19  -1   0   -0.65    6.02 
  19   1   0   -8.95    8.17 
  19  -1   1   -6.68    5.37 
  19   1   1  -10.13    8.53 
  19  -1   2   -4.72    9.36 
  19   1   2   10.37    8.14 
  19  -1   3   -2.62    3.24 
  19   1   3  -11.74   11.66 
  19  -1   4  -10.08    9.53 
  19   1   4   -2.85    7.63 
  19  -1   5   -2.79    8.70 
  19   1   5   -4.18    8.72 
  19  -1   6  -14.44    8.43 
  19   1   6   -8.64    9.69 
  19  -2 -21   21.93    7.93 
  19  -2 -20   -4.02    6.31 
  19  -2 -19   -5.59    9.34 
  19   2 -19   10.20   11.67 
  19  -2 -18   -1.36    6.37 
  19   2 -18   10.06   12.55 
  19  -2 -17   -9.10    9.73 
  19   2 -17  -10.44   11.37 
  19  -2 -16  -10.88    8.30 
  19   2 -16    0.74    6.31 
  19   2 -15   -0.35    7.63 
  19  -2 -15   -3.87    7.41 
  19   2 -14  -10.40    6.20 
  19  -2 -14    6.79    5.16 
  19   2 -13    2.92    4.15 
  19  -2 -13    8.88    5.48 
  19  -2 -12   -7.93    6.57 
  19   2 -12  -10.21    7.89 
  19   2 -11    2.68    5.73 
  19  -2 -11    6.42    4.48 
  19  -2 -10   16.72    7.37 
  19   2 -10    8.91    7.81 
  19   2  -9    4.03    4.59 
  19  -2  -9    0.05    5.34 
  19  -2  -8    2.28    4.51 
  19   2  -8   15.53    9.20 
  19  -2  -7    6.90    4.88 
  19  -2  -7    2.02    3.30 
  19  -2  -6    9.60    4.76 
  19  -2  -6    6.57    8.01 
  19  -2  -5    2.23    4.40 
  19  -2  -4    1.36    6.14 
  19  -2  -3   -0.74    7.64 
  19  -2  -2   -9.18    9.29 
  19   2  -2   -8.81    7.86 
  19  -2  -1    1.68    6.21 
  19   2  -1   -2.99    9.05 
  19  -2   0   -8.43    7.00 
  19   2   0   12.92    8.28 
  19  -2   1   -5.91    6.60 
  19   2   1    9.66   10.29 
  19  -2   2   -3.47    6.63 
  19   2   2   -2.60    3.91 
  19  -2   3  -15.62   10.22 
  19   2   3   -6.55    9.42 
  19  -2   4   -0.02    6.09 
  19   2   4   21.45   14.21 
  19  -2   5   -4.48   12.02 
  19   2   5  -17.16   12.50 
  19   2   6   -9.00    9.41 
  19  -3 -18   -5.15    5.34 
  19   3 -18   -5.73    5.72 
  19  -3 -17   15.86    8.44 
  19   3 -17    3.71    5.00 
  19  -3 -16   -6.39    6.83 
  19   3 -16   -2.41    5.02 
  19   3 -15   -0.21    5.82 
  19  -3 -15   -0.29    6.36 
  19   3 -14   -8.20    8.48 
  19  -3 -14   -3.62    6.84 
  19  -3 -13    9.53    4.94 
  19   3 -13    0.97    5.13 
  19  -3 -12    1.26    4.91 
  19   3 -12   -0.36    5.70 
  19   3 -11    3.78    5.38 
  19  -3 -11    0.87    3.61 
  19  -3 -10    6.27    5.08 
  19   3 -10    8.80    8.51 
  19  -3  -9   -0.76    5.17 
  19   3  -9   -4.90    6.07 
  19   3  -8   -5.90    5.39 
  19  -3  -8   -2.69    3.19 
  19  -3  -8    5.55    4.21 
  19  -3  -7    7.43    5.27 
  19  -3  -7    9.16    8.14 
  19  -3  -6    8.43    6.00 
  19  -3  -6    8.26    9.15 
  19  -3  -5   -2.33    4.76 
  19  -3  -5    8.18    4.63 
  19  -3  -4    2.97    3.86 
  19  -3  -3    9.32    8.12 
  19  -3  -2   -4.91    7.77 
  19  -3  -1   -0.62    3.77 
  19  -3   0    1.11    3.23 
  19  -3   1   -5.11    7.58 
  19   3   1  -12.81   10.54 
  19  -3   2    4.92    4.14 
  19   3   2   12.77   11.84 
  19  -3   3    5.87   11.31 
  19   3   3    7.94    5.11 
  19  -3   4   -6.72    6.45 
  19   3   4   -6.95   11.53 
  19  -3   5  -11.22   12.62 
  19   3   5   11.86   10.56 
  19   4 -16    1.41    5.86 
  19   4 -15   -2.95    5.99 
  19   4 -14   10.94    7.51 
  19   4 -13   11.04    8.28 
  19   4 -12    2.91    3.76 
  19   4 -11    0.77    4.31 
  19   4 -10   -2.24    5.44 
  19   4  -9    2.79    5.85 
  19  -4  -8    2.02    4.23 
  19   4  -8   -6.31    6.70 
  19  -4  -7   -7.24    3.87 
  19  -4  -6   -6.20    6.19 
  19  -4  -5    1.40    3.31 
  19  -4  -4   -0.52    4.19 
  19  -4  -3    0.40    3.40 
  19  -4  -2  -10.72    6.23 
  19  -4  -1   12.91    8.52 
  19  -4   0   -4.18    4.25 
  19  -4   1    7.13    8.60 
  19  -4   2    5.06    8.14 
  19  -4   3  -16.56    9.91 
  19  -4   4    3.72    5.17 
  19   4   4  -12.27   11.98 
  19   5 -15    5.27    4.76 
  19   5 -14    7.88   10.15 
  19   5 -13    4.70    6.87 
  19   5 -12    4.97    7.54 
  19   5 -11   -3.69    7.50 
  19   5 -10   14.88   10.43 
  19   5  -9    7.85    5.43 
  19  -5  -9    4.44    4.34 
  19   5  -8   -9.69    6.87 
  19  -5  -8   -0.77    5.45 
  19   5  -7   -2.88    4.48 
  19  -5  -7  -10.88    7.83 
  19  -5  -6    0.87    3.63 
  19  -5  -5    5.36    4.86 
  19  -5  -4    6.76    8.64 
  19  -5  -3    2.20    3.97 
  19  -5  -2    0.52    5.58 
  19  -5  -1   -4.66    5.58 
  19  -5   0   -4.44    3.80 
  19  -5   1  -13.49    8.72 
  19  -5   2   -1.37    5.16 
  19  -5   3    6.13    6.22 
  19   6 -12  -17.53   11.33 
  19   6 -11   -2.81    5.55 
  19   6 -10    3.03    4.75 
  19   6  -9    3.25    5.06 
  19  -6  -8    8.08    6.56 
  19   6  -8    1.27    6.87 
  19  -6  -7   -1.21    4.34 
  19   6  -7    6.02    5.59 
  19  -6  -6   19.90   10.01 
  19  -6  -5   -3.67    5.17 
  19  -6  -4   14.17    8.51 
  19  -6  -3    4.35    6.47 
  19  -6  -2   -2.57    3.25 
  19  -6  -1    6.65    7.00 
  19  -6   0    0.11    6.01 
  19  -6   1    7.20    6.33 
  19  -6   2    6.49    4.88 
  19  -7  -6    0.82    5.91 
  19  -7  -5    2.63    7.74 
  19  -7  -4  -16.42   11.51 
  19  -7  -3   -4.98    4.73 
  19  -7  -2   16.65   11.07 
  19  -7  -1    5.32    5.65 
  19  -7   0    3.70    4.73 
  19  -7   1  -23.53   15.21 
  19  -8  -3    1.61    8.78 
  19  -8  -2   -1.42    4.63 
  19  -8  -1   22.73   14.32 
  20   0 -20   15.30   10.43 
  20   0 -19   11.70    7.28 
  20   0 -18   -9.02    5.19 
  20   0 -17   18.23   11.22 
  20   0 -16   -4.44    5.77 
  20   0 -15    2.23    4.56 
  20   0 -14   21.81   11.70 
  20   0 -13    5.04    5.72 
  20   0 -12    2.56    3.08 
  20   0 -11   -4.07    4.84 
  20   0 -10   -0.59    4.16 
  20   0  -9    6.48    4.42 
  20   0  -8   36.66   13.32 
  20   0  -7   -3.59    5.99 
  20   0  -5  -10.54    7.91 
  20   0  -4    5.45    7.12 
  20   0  -3   -4.54    5.19 
  20   0  -2  -10.86    8.09 
  20   0  -1   -3.39    6.61 
  20   0   0   13.88   10.86 
  20   0   1    7.66    8.58 
  20   0   2    3.95    6.06 
  20   0   3   -5.99    4.08 
  20   0   4  -14.65    6.88 
  20  -1 -20   -3.26   10.89 
  20  -1 -19  -27.65   12.40 
  20   1 -19  -12.31   13.70 
  20  -1 -18   20.25   10.44 
  20   1 -18   -2.30    8.48 
  20  -1 -17   14.89    8.89 
  20   1 -17   -5.55    4.28 
  20  -1 -16    0.18    4.45 
  20   1 -16   -5.64    6.08 
  20   1 -15  -13.94    9.70 
  20  -1 -15   -4.55    3.88 
  20   1 -14   -3.61    8.47 
  20  -1 -14    2.22    4.83 
  20  -1 -13    9.61    6.84 
  20   1 -13    0.58    5.94 
  20  -1 -12   -3.97    5.00 
  20   1 -12   -5.34    7.71 
  20   1 -11    3.36    5.90 
  20  -1 -11   -5.86    6.72 
  20   1 -10   12.61    9.03 
  20  -1 -10    9.45    7.94 
  20   1  -9    0.87    2.70 
  20  -1  -9    2.99    4.50 
  20  -1  -8   10.78    7.06 
  20   1  -8   -8.86    6.49 
  20  -1  -7   16.01    8.85 
  20  -1  -6    7.48    9.25 
  20  -1  -5    5.27    5.60 
  20  -1  -4   -9.28    8.34 
  20  -1  -3   -3.12    4.84 
  20   1  -3   -2.34    6.65 
  20  -1  -2   -7.76    9.42 
  20   1  -2  -10.60    8.14 
  20  -1  -1  -18.93    8.70 
  20   1  -1    2.38    3.35 
  20  -1   0    1.75    6.22 
  20   1   0  -11.86   11.12 
  20  -1   1   -3.94    3.20 
  20   1   1   -5.97    9.72 
  20  -1   2   -2.33    6.16 
  20   1   2   -6.14    4.57 
  20  -1   3  -10.60   10.65 
  20   1   3  -18.11   10.47 
  20  -1   4  -15.72   12.13 
  20   1   4    6.02    5.19 
  20  -2 -20   32.11   12.64 
  20  -2 -19  -14.83   11.91 
  20  -2 -18    9.02    8.09 
  20   2 -18   -0.02    8.19 
  20  -2 -17   20.18    9.71 
  20   2 -17   -9.35    6.82 
  20  -2 -16    9.08    7.04 
  20   2 -16    3.73    7.75 
  20   2 -15    2.74    4.96 
  20  -2 -15   -8.58    7.16 
  20   2 -14   26.54   12.52 
  20  -2 -14   24.33    9.61 
  20   2 -13   -6.32    7.23 
  20  -2 -13   -6.27    7.05 
  20  -2 -12    2.90    3.85 
  20   2 -12    1.86    3.24 
  20   2 -11   -5.05    4.85 
  20  -2 -11   -1.14    4.53 
  20  -2 -10   -1.02    4.49 
  20   2 -10  -10.97   10.04 
  20   2  -9    2.22    7.02 
  20  -2  -9   -5.33    6.48 
  20  -2  -8   12.37    7.54 
  20   2  -8    0.41    3.39 
  20  -2  -7   14.57    6.60 
  20  -2  -7   -8.72    6.24 
  20  -2  -6   11.44    6.45 
  20  -2  -6   -3.96    8.37 
  20  -2  -5    2.62    6.72 
  20  -2  -4    7.08    6.23 
  20  -2  -3   -1.28    5.24 
  20  -2  -2    3.83    4.02 
  20  -2  -1   -0.93    5.08 
  20   2  -1   -1.47    6.32 
  20  -2   0   12.10    7.87 
  20   2   0   -2.86    4.35 
  20  -2   1    3.98    7.95 
  20   2   1   -6.26   11.36 
  20  -2   2   -9.37    5.49 
  20   2   2  -11.21    6.07 
  20  -2   3   19.87   14.01 
  20   2   3    0.15    4.90 
  20   3 -17   -3.23    4.55 
  20   3 -16   -6.05    6.22 
  20   3 -15    6.29    3.24 
  20   3 -14   -2.46    7.17 
  20  -3 -14   -8.41    4.88 
  20  -3 -13   -9.91    6.17 
  20   3 -13    6.24    6.55 
  20  -3 -12    2.02    4.98 
  20   3 -12    5.78    5.90 
  20   3 -11   13.04    9.82 
  20  -3 -11  -10.71    6.85 
  20  -3 -10    4.96    2.88 
  20   3 -10   11.11    7.83 
  20  -3  -9   -3.95    5.06 
  20   3  -9    1.45    3.67 
  20   3  -8   -4.57    3.82 
  20  -3  -8   10.39    8.52 
  20  -3  -8   10.13    6.22 
  20  -3  -7    5.20    4.92 
  20  -3  -7    0.69    7.52 
  20  -3  -6   -3.63    4.94 
  20  -3  -6    1.20    6.59 
  20  -3  -5    8.61    6.38
[truncated: 12,636 more chars]
